# Supplementary material for: A conserved triple arginine motif in OMA-1 is required for RNA-binding activity and embryo viability
Source: bioRxiv preprint, doi:10.1101/2025.05.09.653132, version 2 (2025-05-12)
Supplement: Supplemental Data Set 2 [file 653132_file05.xlsx]

## Sheet: Normalized Counts
Gene	Name	Type	Chr	Start	End	WRM66_1:DESeq2NormalizedCount	WRM66_2:DESeq2NormalizedCount	WRM66aux_1:DESeq2NormalizedCount	WRM66aux_2:DESeq2NormalizedCount	WRM92_1:DESeq2NormalizedCount	WRM92_2:DESeq2NormalizedCount	WRM92aux_1:DESeq2NormalizedCount	WRM92aux_2:DESeq2NormalizedCount
WBGene00000001	aap-1	protein_coding	I	5107843	5110183	541.102	484.948	513.457	521.143	474.537	470.111	814.658	809.169
WBGene00000002	aat-1	protein_coding	IV	9599178	9601695	108.51	133.608	121.391	83.5281	131.576	150.718	20.1898	28.5925
WBGene00000003	aat-2	protein_coding	V	9244402	9246360	121.531	205.361	210.111	183.399	182.265	193.368	48.4555	65.7628
WBGene00000004	aat-3	protein_coding	X	2552260	2557736	345.784	481.237	313.971	303.243	349.432	392.828	146.376	82.9184
WBGene00000005	aat-4	protein_coding	IV	6272529	6275721	52.0846	35.8763	87.9225	90.7914	32.3548	42.0086	89.8446	85.7776
WBGene00000006	aat-5	protein_coding	I	2571740	2576020	426.805	442.886	325.127	343.192	250.21	331.9	42.3986	51.4666
WBGene00000007	aat-6	protein_coding	V	11466842	11470663	125.871	122.474	145.564	114.397	156.381	133.081	94.892	91.4961
WBGene00000008	aat-7	protein_coding	II	1386870	1391639	18.8083	12.3711	15.4064	12.7108	5.39247	15.7131	7.06643	8.57776
WBGene00000009	aat-8	protein_coding	IV	3862033	3865044	14.468	34.6391	11.422	14.5266	34.5118	40.7259	7.06643	5.71851
WBGene00000010	aat-9	protein_coding	I	11388682	11396662	478.889	440.412	527.535	571.986	421.691	417.2	900.465	817.747
WBGene00000012	abf-1	protein_coding	I	3886070	3887095	1.4468	4.94845	8.23443	7.26332	3.23548	14.1098	6.05694	2.85925
WBGene00000013	abf-2	protein_coding	I	3885631	3885888	33.2763	16.0825	9.56257	5.44749	14.0204	15.7131	4.03796	2.85925
WBGene00000016	abf-5	protein_coding	X	12792854	12793386	36.1699	44.536	26.5627	25.4216	39.9042	35.9157	11.1044	2.85925
WBGene00000017	abf-6	protein_coding	X	12794118	12794870	65.1058	59.3814	47.5472	56.2907	79.8085	74.7175	9.0854	11.437
WBGene00000018	abl-1	protein_coding	X	10605827	10624207	581.612	875.876	647.864	610.119	606.113	681.437	413.891	403.155
WBGene00000019	abt-1	protein_coding	IV	10206189	10214911	5.78718	8.65979	13.547	9.07914	17.2559	25.9748	34.3226	45.7481
WBGene00000020	abt-2	protein_coding	I	2255921	2272866	745.1	718.762	731.536	728.147	414.141	666.044	234.202	291.644
WBGene00000021	abt-3	pseudogene	IV	12950315	12957128	2.89359	1.23711	3.71878	1.81583	1.07849	3.52744	6.05694	2.85925
WBGene00000022	abt-4	protein_coding	V	323777	330725	772.589	832.577	1337.7	1280.16	564.052	764.813	857.057	960.709
WBGene00000023	abt-5	protein_coding	I	12011195	12018684	4.34039	7.42267	11.1563	18.1583	8.62794	23.4094	35.3321	40.0296
WBGene00000024	abu-1	protein_coding	V	10380340	10381826	1.4468	4.94845	41.969	45.3957	2.15699	4.48947	10.0949	11.437
WBGene00000027	abu-4	protein_coding	V	2274842	2275977	0	1.23711	0.265627	0	0	2.24473	1.00949	0
WBGene00000029	abu-6	protein_coding	V	5160678	5161892	1.4468	0	53.1254	38.1324	1.07849	0.641352	8.07592	11.437
WBGene00000030	abu-7	protein_coding	V	5163270	5164782	0	0	63.7504	87.1598	0	0.962028	19.1803	14.2963
WBGene00000031	abu-8	protein_coding	V	5192995	5194608	101.276	211.546	577.738	544.749	175.794	356.592	61.5789	42.8888
WBGene00000033	abu-10	protein_coding	X	3798182	3799741	18.8083	47.0103	199.22	176.135	46.3752	88.1859	18.1708	11.437
WBGene00000034	abu-11	protein_coding	II	192509	194558	46.2975	102.68	191.251	236.058	79.8085	166.11	51.484	34.311
WBGene00000035	ace-1	protein_coding	X	16367293	16373789	193.871	215.258	146.892	147.082	209.228	220.946	31.2942	28.5925
WBGene00000036	ace-2	protein_coding	I	3301368	3307935	484.677	498.556	466.706	486.642	404.435	479.411	102.968	71.4813
WBGene00000037	ace-3	protein_coding	II	14205635	14210214	295.146	404.536	156.454	141.635	277.173	392.828	19.1803	17.1555
WBGene00000038	ace-4	protein_coding	II	14198046	14205460	75.2334	86.5979	61.6254	52.659	44.2182	53.8736	6.05694	5.71851
WBGene00000039	acn-1	protein_coding	X	5092481	5097067	332.763	926.597	1900.29	1833.99	581.308	748.458	44.4175	65.7628
WBGene00000040	aco-1	protein_coding	X	11339874	11343327	2382.87	2263.92	4507.16	4485.1	1759.02	2849.21	2724.61	3053.68
WBGene00000041	aco-2	protein_coding	III	7973717	7977355	7436.53	7190.1	9432.14	9340.62	6325.36	7740.8	9319.61	9389.79
WBGene00000042	acr-2	protein_coding	X	6702549	6709308	41.9571	43.2989	27.8908	47.2116	23.7268	35.2744	1.00949	5.71851
WBGene00000043	acr-3	protein_coding	X	6709538	6712925	23.1487	14.8453	8.23443	7.26332	11.8634	14.4304	0	0
WBGene00000044	acr-5	protein_coding	III	6509445	6514773	47.7443	43.2989	22.047	21.7899	25.8838	34.9537	1.00949	0
WBGene00000045	acr-6	protein_coding	I	4359207	4362548	4.34039	3.71134	3.45315	1.81583	2.15699	2.24473	0	2.85925
WBGene00000046	acr-7	protein_coding	II	7845631	7849797	30.3827	17.3196	17.5314	23.6058	17.2559	21.4853	0	0
WBGene00000047	acr-8	protein_coding	X	10412725	10416661	115.744	136.082	100.673	76.2648	103.535	149.435	11.1044	17.1555
WBGene00000048	acr-9	protein_coding	X	13642313	13646898	27.4891	39.5876	26.0314	27.2374	25.8838	31.4263	2.01898	0
WBGene00000049	acr-10	protein_coding	X	4022267	4025641	17.3615	4.94845	6.37504	3.63166	5.39247	13.4684	1.00949	0
WBGene00000050	acr-11	protein_coding	I	6621624	6624918	27.4891	33.402	15.9376	21.7899	28.0408	25.9748	9.0854	5.71851
WBGene00000051	acr-12	protein_coding	X	13532853	13536459	50.6378	74.2267	40.3753	47.2116	60.3956	57.401	9.0854	2.85925
WBGene00000053	acr-14	protein_coding	II	8174937	8177195	8.68077	12.3711	10.0938	9.07914	18.3344	6.09285	1.00949	0
WBGene00000054	acr-15	protein_coding	V	8552695	8555383	34.7231	58.1443	50.7347	39.9482	33.4333	46.498	18.1708	20.0148
WBGene00000055	acr-16	protein_coding	V	8561216	8564345	69.4462	47.0103	56.8441	58.1065	66.8666	71.5108	27.2562	25.7333
WBGene00000056	acr-17	protein_coding	V	2608652	2615262	28.9359	9.8969	16.4689	23.6058	11.8634	21.806	9.0854	5.71851
WBGene00000057	acr-18	protein_coding	V	15551157	15559147	30.3827	30.9278	20.7189	18.1583	20.4914	27.2575	14.1329	5.71851
WBGene00000058	acr-19	protein_coding	I	9031235	9036695	44.8507	71.7525	27.6252	21.7899	42.0612	51.3082	1.00949	2.85925
WBGene00000059	acr-20	protein_coding	II	14373831	14377896	37.6167	44.536	34.2659	30.8691	25.8838	37.5191	6.05694	0
WBGene00000060	acr-21	protein_coding	III	6581885	6586580	39.0635	29.6907	21.5158	19.9741	15.0989	24.6921	1.00949	5.71851
WBGene00000061	lgc-11	protein_coding	X	7503780	7506633	33.2763	38.3505	18.5939	25.4216	19.4129	30.7849	1.00949	0
WBGene00000062	acr-23	protein_coding	V	3651656	3659572	31.8295	22.268	34.0002	36.3166	15.0989	20.5233	2.01898	0
WBGene00000063	act-1	protein_coding	V	11081052	11082415	2708.4	2648.66	3348.23	3301.18	2004.92	2459.27	1831.21	1809.91
WBGene00000064	act-2	protein_coding	V	11076777	11078154	5098.51	4624.33	6370.79	6471.61	4737.82	4509.35	9982.84	10233.3
WBGene00000065	act-3	protein_coding	V	11071690	11074498	4350.51	4183.91	3997.15	4101.96	3210.67	3968.69	2739.75	2756.32
WBGene00000066	act-4	protein_coding	X	4960621	4964413	22952	23802	23474.2	23262.6	15905.6	21305.7	11306.3	11308.3
WBGene00000067	act-5	protein_coding	III	13604412	13606066	5016.04	4783.91	9303.32	9257.1	3628.05	4567.39	5114.07	5301.06
WBGene00000068	acy-1	protein_coding	III	4722095	4730919	496.251	644.536	443.597	417.641	402.278	574.331	85.8066	65.7628
WBGene00000069	acy-2	protein_coding	V	5976024	5981478	107.063	105.155	55.2504	65.3698	66.8666	76.9623	10.0949	11.437
WBGene00000070	acy-3	protein_coding	III	3774896	3786477	477.443	555.463	575.879	557.459	345.118	490.955	122.148	131.526
WBGene00000071	acy-4	protein_coding	V	5624727	5630892	206.892	136.082	126.438	127.108	135.89	149.756	73.6927	97.2146
WBGene00000072	add-1	protein_coding	X	4854065	4860045	167.828	186.804	184.876	208.82	91.6719	170.279	108.015	82.9184
WBGene00000073	add-2	protein_coding	V	12009540	12013406	209.785	183.093	167.876	145.266	205.992	187.916	140.319	148.681
WBGene00000074	adm-2	protein_coding	X	13687955	13695801	475.996	509.69	507.879	481.195	389.336	438.364	388.653	406.014
WBGene00000075	adm-4	protein_coding	X	7794875	7798298	157.701	155.876	250.486	230.61	147.754	146.549	250.353	274.488
WBGene00000079	adr-1	protein_coding	I	7773416	7777655	959.225	900.618	1069.15	1111.29	762.495	832.155	1255.8	1206.61
WBGene00000080	adr-2	protein_coding	III	7231039	7232882	761.014	624.742	673.895	660.962	730.14	621.791	1132.65	1146.56
WBGene00000081	ads-1	protein_coding	III	295654	298556	1749.18	2104.33	1802.54	1781.33	1905.7	1795.15	1232.59	1209.46
WBGene00000082	adt-1	protein_coding	X	12678832	12689279	127.318	310.515	571.363	622.829	201.678	362.685	61.5789	22.874
WBGene00000083	adt-2	protein_coding	X	7586209	7595416	619.228	623.505	1019.74	1002.34	373.159	540.981	337.169	385.999
WBGene00000084	aex-1	protein_coding	I	7602307	7608245	167.828	127.423	102.001	110.766	140.204	143.984	95.9015	85.7776
WBGene00000085	aex-2	protein_coding	X	9650999	9653116	18.8083	21.0309	17.5314	10.895	22.6484	26.9368	4.03796	0
WBGene00000086	aex-3	protein_coding	X	751203	759734	570.037	712.577	330.44	364.982	409.827	590.685	86.8161	114.37
WBGene00000088	aex-5	protein_coding	I	14850052	14855827	305.274	263.505	223.392	190.662	271.78	228.963	89.8446	145.822
WBGene00000089	aex-6	protein_coding	I	13543068	13545188	111.403	124.948	90.8444	92.6073	158.538	152	33.3132	31.4518
WBGene00000090	age-1	protein_coding	II	11519328	11527054	1022.88	894.432	1184.96	1113.1	779.75	907.834	1821.12	1864.23
WBGene00000092	ags-3	protein_coding	X	5289724	5303600	462.975	524.536	316.627	321.402	406.592	398.28	288.714	248.755
WBGene00000093	agt-1	protein_coding	IV	13368276	13369412	163.488	132.371	141.579	145.266	159.617	137.891	210.983	217.303
WBGene00000094	agt-2	protein_coding	II	5371980	5373827	224.253	201.649	190.454	170.688	182.265	162.262	331.113	297.362
WBGene00000095	aha-1	protein_coding	I	10193925	10196997	273.444	360	233.486	234.242	300.9	307.208	198.869	211.585
WBGene00000096	ahr-1	protein_coding	I	9522550	9531132	24.5955	56.9072	25.2346	27.2374	32.3548	34.633	4.03796	0
WBGene00000097	aip-1	protein_coding	V	14012333	14013644	351.571	314.227	243.845	308.691	325.705	329.976	382.596	374.562
WBGene00000098	air-1	protein_coding	V	8221488	8223582	1426.54	993.401	1288.29	1314.66	1200.36	1079.72	2247.12	2193.05
WBGene00000099	air-2	protein_coding	I	5937195	5938881	454.294	423.092	474.41	419.456	443.261	385.453	866.142	803.45
WBGene00000100	ajm-1	protein_coding	X	9082946	9113619	2824.14	4599.58	2301.66	2360.58	2372.68	3682.97	828.791	949.272
WBGene00000101	aka-1	protein_coding	II	7472729	7478537	3107.72	2665.98	3096.68	3074.2	1987.66	2672.19	4982.84	4952.23
WBGene00000102	akt-1	protein_coding	V	10248905	10252845	1733.26	1516.7	1545.95	1505.32	1557.34	1489.54	2328.89	2358.88
WBGene00000103	akt-2	protein_coding	X	14147700	14152070	355.912	376.082	245.705	187.03	323.548	354.347	69.6548	85.7776
WBGene00000105	alg-1	protein_coding	X	13949110	13956261	1723.13	2197.11	2592.52	2789.11	1227.33	1885.26	865.132	889.228
WBGene00000106	alg-2	protein_coding	II	873212	879885	868.077	1243.3	1557.37	1539.82	1054.77	979.666	1364.83	1395.32
WBGene00000107	alh-1	protein_coding	III	5077764	5080661	3456.39	2746.39	3286.34	3293.91	2310.13	5141.08	3378.76	3588.36
WBGene00000108	alh-2	protein_coding	V	1644169	1647728	4.34039	0	1.32813	1.81583	0	0.962028	0	0
WBGene00000109	alh-3	protein_coding	IV	11022603	11025870	1846.11	1948.45	1502.39	1483.53	1561.66	1772.06	1215.43	1158
WBGene00000110	alh-4	protein_coding	V	6427208	6429920	1646.45	1642.89	1495.21	1552.53	1357.82	1522.57	1718.15	1655.51
WBGene00000111	alh-5	protein_coding	V	1996105	1999581	144.68	160.825	128.829	136.187	153.146	169.958	41.3891	17.1555
WBGene00000112	alh-6	protein_coding	II	1306240	1310133	787.057	978.556	1157.87	1116.73	740.925	744.289	874.218	983.583
WBGene00000113	alh-7	protein_coding	II	13487243	13491786	538.208	515.876	766.068	818.939	518.755	520.778	631.94	606.162
WBGene00000114	alh-8	protein_coding	II	11729055	11731198	14967.1	13766.6	16284.8	16620.3	9715.07	14296.1	13737.1	14253.4
WBGene00000115	alh-9	protein_coding	III	5856018	5859179	1257.27	1157.94	1778.9	1643.33	723.669	1110.5	1911.97	1867.09
WBGene00000116	alh-10	protein_coding	X	7140504	7143641	234.381	194.227	171.861	167.056	195.207	152.321	146.376	151.54
WBGene00000117	alh-11	protein_coding	III	774321	778871	441.273	421.855	432.441	441.246	303.057	454.398	600.646	546.117
WBGene00000118	alh-12	protein_coding	III	7454074	7455936	973.693	763.298	693.286	717.252	697.785	762.247	542.096	474.636
WBGene00000120	aly-1	protein_coding	IV	9108931	9109753	183.743	241.237	210.376	185.215	253.446	211.967	218.05	168.696
WBGene00000121	aly-2	protein_coding	IV	9147468	9148579	1403.39	1202.47	1175.93	1222.05	1293.11	1027.13	2022.01	1967.17
WBGene00000122	aly-3	protein_coding	IV	12123282	12124809	1332.5	1213.61	1349.65	1458.11	1394.49	1104.09	1725.22	1884.25
WBGene00000123	ama-1	protein_coding	IV	4248070	4258169	3800.73	3896.9	6207.17	6246.45	2751.24	3369.99	6804.97	6876.5
WBGene00000133	amt-1	protein_coding	X	4571437	4573914	7.23398	9.8969	44.8909	50.8432	4.31397	8.97893	45.427	37.1703
WBGene00000134	amt-2	protein_coding	IV	13042391	13047043	11.5744	24.7422	17.0001	16.3425	11.8634	14.4304	3.02847	0
WBGene00000135	amt-3	protein_coding	II	8363172	8369159	54.9782	79.1752	43.8284	38.1324	42.0612	59.6458	10.0949	11.437
WBGene00000136	amt-4	protein_coding	X	4565302	4569620	470.209	512.165	382.237	381.324	402.278	400.525	334.141	354.547
WBGene00000137	amx-1	protein_coding	III	3822403	3826260	253.189	258.557	243.314	274.19	256.681	239.545	282.657	288.785
WBGene00000138	amx-2	protein_coding	I	12759587	12764960	179.403	167.01	232.158	216.084	121.87	177.975	111.044	105.792
WBGene00000139	amx-3	protein_coding	V	20898840	20903714	60.7654	51.9587	39.3128	45.3957	32.3548	36.5571	49.465	31.4518
WBGene00000140	anc-1	protein_coding	I	4318033	4359092	7273.04	8032.57	7936.4	7737.25	3341.17	6776.53	3335.35	3196.65
WBGene00000142	aos-1	protein_coding	V	10127492	10130295	813.099	702.68	782.802	768.096	896.228	649.049	1216.43	1226.62
WBGene00000143	apc-2	protein_coding	III	8080629	8083701	724.845	585.154	702.583	668.225	707.491	566.314	1151.83	1183.73
WBGene00000144	apc-10	protein_coding	V	10425362	10426353	231.487	169.484	154.86	156.161	221.091	169.958	340.198	320.236
WBGene00000145	apc-11	protein_coding	III	4593863	4594424	276.338	256.082	169.204	170.688	347.275	221.267	331.113	348.829
WBGene00000146	ape-1	protein_coding	V	11675938	11685274	1937.26	1877.94	1884.62	1852.15	1577.84	1715.94	2815.47	2750.6
WBGene00000147	aph-1	protein_coding	I	9232068	9233560	244.508	202.886	224.189	205.189	323.548	261.03	381.587	331.673
WBGene00000148	aph-2	protein_coding	I	10340997	10345654	510.719	472.577	537.629	530.222	555.424	450.229	724.813	717.673
WBGene00000149	apl-1	protein_coding	X	5112422	5116866	4120.47	5545.98	3784.39	3758.77	3163.22	4743.12	1205.33	1166.58
WBGene00000150	apm-1	protein_coding	I	5342180	5344724	493.357	489.897	410.925	377.692	366.688	432.592	181.708	220.163
WBGene00000151	apn-1	protein_coding	II	8047564	8049063	477.443	390.928	392.065	394.035	335.411	370.381	597.618	714.813
WBGene00000155	app-1	protein_coding	I	4964667	4967089	1540.84	1297.73	1718.87	1692.35	1627.45	1294.89	2634.77	2550.45
WBGene00000156	apr-1	protein_coding	I	8050037	8055475	1744.84	1656.49	1686.73	1745.01	1323.31	1596.65	3018.37	2922.16
WBGene00000157	aps-2	protein_coding	X	4458272	4459255	118.637	147.216	144.767	161.609	153.146	132.119	113.063	154.4
WBGene00000158	apg-1	protein_coding	I	14406028	14417934	1300.67	1536.49	1698.15	1668.75	1203.6	1284.95	1783.77	1795.61
WBGene00000159	aps-1	protein_coding	V	6017970	6018886	354.465	320.412	267.752	265.111	383.944	326.128	357.359	351.688
WBGene00000160	apb-1	protein_coding	III	2583971	2597034	1461.26	1697.32	1993	1946.57	1116.24	1543.09	1874.62	1792.75
WBGene00000161	apa-2	protein_coding	X	9338675	9342900	886.886	1093.61	1065.43	1094.94	816.419	918.737	571.371	614.74
WBGene00000162	apd-3	protein_coding	II	3532527	3546431	943.311	1005.77	1247.12	1218.42	842.303	884.746	1380.98	1401.03
WBGene00000163	apb-3	protein_coding	I	7853750	7857853	1089.44	1167.83	1093.32	1156.68	1081.73	1038.03	1472.85	1555.43
WBGene00000164	apm-3	protein_coding	X	954975	957762	162.041	240	216.22	221.531	225.405	184.709	124.167	120.089
WBGene00000165	aps-3	protein_coding	I	1154514	1156020	818.886	821.443	748.536	749.937	1193.89	766.095	1271.96	1372.44
WBGene00000166	apt-9	protein_coding	X	11068527	11072047	76.6802	86.5979	59.5004	45.3957	48.5322	70.5488	3.02847	5.71851
WBGene00000168	apx-1	protein_coding	V	3210196	3223221	766.802	669.278	998.491	956.942	585.622	713.504	1820.11	1889.97
WBGene00000169	aqp-1	protein_coding	II	7235828	7238349	386.294	228.866	322.205	286.901	432.476	1144.49	242.277	260.192
WBGene00000170	aqp-2	protein_coding	II	9259048	9261981	2991.97	5568.24	2450.94	2378.74	2809.47	3921.87	232.183	251.614
WBGene00000171	aqp-3	protein_coding	IV	10961229	10966459	8.68077	2.47422	1.85939	5.44749	5.39247	7.05488	5.04745	11.437
WBGene00000172	aqp-4	protein_coding	V	9737556	9739740	141.786	139.794	228.97	257.848	175.794	191.444	91.8635	140.103
WBGene00000173	aqp-5	protein_coding	V	10491743	10493256	10.1276	6.18556	6.37504	10.895	7.54945	8.33758	1.00949	0
WBGene00000174	aqp-6	protein_coding	V	10648446	10651997	14.468	18.5567	16.2032	16.3425	20.4914	15.7131	2.01898	2.85925
WBGene00000175	aqp-7	protein_coding	X	3025063	3026974	1160.33	1098.56	1538.78	1485.35	795.928	1315.09	878.256	846.339
WBGene00000176	aqp-8	protein_coding	X	4702167	4704977	535.314	697.731	423.94	433.983	416.298	514.685	325.056	348.829
WBGene00000177	aqp-9	protein_coding	I	9605896	9609047	65.1058	71.7525	44.6253	56.2907	63.6311	46.498	19.1803	11.437
WBGene00000178	aqp-10	protein_coding	II	9768458	9769847	434.039	482.474	373.206	337.744	567.287	454.719	366.445	377.421
WBGene00000179	aqp-11	protein_coding	III	13673280	13674739	215.573	244.948	302.815	292.348	246.975	215.174	236.221	203.007
WBGene00000180	arc-1	protein_coding	II	9674978	9677210	199.658	184.33	201.345	214.268	174.716	181.182	85.8066	108.652
WBGene00000181	ard-1	protein_coding	IV	11131279	11133805	1183.48	1066.39	1131.57	1296.5	1207.91	1034.5	1422.37	1398.18
WBGene00000182	arf-1	protein_coding	III	5714886	5717586	2406.02	2599.17	3351.68	3239.44	2429.84	2508.33	2752.88	2756.32
WBGene00000183	arf-5	protein_coding	IV	7982526	7983852	2041.43	2335.67	2792.27	2603.9	1990.9	2264.29	2425.8	2527.58
WBGene00000184	arf-6	protein_coding	IV	16947120	16949564	289.359	334.02	294.846	294.164	281.487	261.992	413.891	431.747
WBGene00000185	arg-1	protein_coding	X	1786907	1788405	4.34039	1.23711	1.85939	0	0	2.88609	0	0
WBGene00000186	ark-1	protein_coding	IV	12622091	12631022	892.673	1029.28	931.022	1018.68	667.587	959.142	1070.06	1106.53
WBGene00000187	arl-1	protein_coding	II	8582000	8583080	298.04	246.185	270.408	288.717	423.848	267.444	366.445	337.392
WBGene00000188	arl-3	protein_coding	II	14606472	14608342	101.276	120	59.5004	38.1324	94.9074	125.384	22.2088	8.57776
WBGene00000189	arl-5	protein_coding	III	9823242	9824132	118.637	149.691	107.313	107.134	185.501	106.785	184.737	208.726
WBGene00000190	warf-1	protein_coding	IV	7634786	7635712	10.1276	3.71134	9.56257	3.63166	9.70644	2.24473	3.02847	0
WBGene00000191	arl-7	pseudogene	X	14980954	14981675	7.23398	6.18556	3.71878	7.26332	12.9419	7.37555	1.00949	2.85925
WBGene00000192	arl-8	protein_coding	IV	14798149	14799227	993.949	870.927	957.585	951.494	937.21	938.94	1342.62	1429.63
WBGene00000193	arl-6	protein_coding	III	4812481	4814830	7.23398	27.2165	7.70318	16.3425	29.1193	21.806	0	2.85925
WBGene00000195	arr-1	protein_coding	X	950782	954233	248.849	347.629	236.939	241.505	221.091	220.625	170.604	185.851
WBGene00000196	aars-1	protein_coding	II	11460205	11464497	282.125	322.886	422.081	406.746	244.818	257.503	449.223	520.384
WBGene00000197	aars-2	protein_coding	I	3983183	3986581	2844.4	2423.5	4231.7	4265.38	2272.38	2407	4479.1	4509.04
WBGene00000198	art-1	protein_coding	II	6970745	6972235	1280.41	1161.65	1775.18	1824.91	954.466	1278.22	2123.97	2038.65
WBGene00000199	arx-1	protein_coding	I	2883549	2893718	827.567	880.824	1065.43	1025.94	822.89	797.522	1024.63	1083.66
WBGene00000200	arx-2	protein_coding	V	10335463	10338355	1015.65	958.762	1021.6	1033.21	922.112	901.741	1345.65	1332.41
WBGene00000201	arx-3	protein_coding	III	12052424	12058458	834.801	836.288	1012.84	1000.52	670.823	748.779	1065.01	1012.18
WBGene00000202	exos-4.2	protein_coding	III	860198	862198	609.101	460.206	543.738	515.695	478.851	448.947	863.113	797.732
WBGene00000203	arx-5	protein_coding	III	12816789	12818100	318.295	340.206	357.268	334.113	350.51	311.377	546.134	491.792
WBGene00000204	arx-6	protein_coding	III	4878658	4879643	399.316	367.422	359.659	363.166	312.763	359.157	518.878	460.34
WBGene00000205	arx-7	protein_coding	I	3069325	3070150	257.53	270.928	289.533	323.218	300.9	237.942	383.606	414.592
WBGene00000206	asb-1	protein_coding	III	4594543	4595821	1730.37	1370.72	1387.9	1483.53	1768.73	1366.08	2703.41	2824.94
WBGene00000207	asb-2	protein_coding	X	4469766	4471476	3151.12	3152.16	4416.58	4644.89	2066.39	3016.6	2172.42	2141.58
WBGene00000208	trip-4	protein_coding	II	15039404	15048904	502.038	470.103	422.878	453.957	438.947	415.276	528.972	563.273
WBGene00000209	asg-1	protein_coding	I	8692946	8693468	925.949	867.216	878.162	869.782	1105.46	863.26	1460.73	1361
WBGene00000210	asg-2	protein_coding	X	6841258	6842121	953.438	934.02	1068.09	1020.5	692.393	980.307	790.43	800.591
WBGene00000211	asm-1	protein_coding	II	6910072	6912659	170.722	202.886	81.0162	70.8173	249.132	138.211	50.4745	57.1851
WBGene00000212	asm-2	protein_coding	X	11321079	11324251	234.381	237.526	183.017	168.872	167.166	149.435	102.968	111.511
WBGene00000213	asm-3	protein_coding	IV	520214	523809	525.187	450.309	124.313	125.292	204.914	114.161	263.477	285.925
WBGene00000214	asp-1	protein_coding	V	19049562	19050752	38920.2	41156.3	26679.6	27459	30723	35441.4	18146.6	18230.6
WBGene00000215	asp-2	protein_coding	V	9203077	9204734	5230.17	6050.72	5514.41	5411.17	5316.97	5948.22	5166.57	5252.45
WBGene00000216	asp-3	protein_coding	X	6791064	6792709	15059.7	15780.6	11113	10993	11976.7	15317.1	7659	7634.21
WBGene00000217	asp-4	protein_coding	X	13218985	13221462	3004.99	2491.54	3200.54	3132.31	3506.18	2700.73	2841.71	2899.28
WBGene00000218	asp-5	protein_coding	V	8272385	8274044	9780.34	9721.23	6570.01	6540.62	7824.47	9175.51	3963.26	4022.97
WBGene00000219	asp-6	protein_coding	V	8267511	8268937	41434.8	33377.3	12940.5	13159.3	27953.5	37664.1	9215.63	8674.98
WBGene00000220	atf-2	protein_coding	II	8751986	8753940	104.169	442.886	181.423	205.189	197.364	304.001	5.04745	2.85925
WBGene00000222	atf-6	protein_coding	X	12480948	12484904	253.189	290.721	267.221	246.953	215.699	251.41	138.3	137.244
WBGene00000223	atf-7	protein_coding	III	4491627	4499045	2494.28	2601.65	2553.47	2556.69	2035.12	2597.48	2769.03	2564.75
WBGene00000224	atgp-1	protein_coding	IV	17269342	17272181	679.994	1024.33	629.801	577.434	571.601	845.302	202.907	182.992
WBGene00000225	atgp-2	protein_coding	II	14640098	14644083	412.337	586.391	600.317	613.75	376.394	507.31	222.088	168.696
WBGene00000226	atl-1	protein_coding	V	9634849	9645595	1951.73	1440	1901.89	1993.78	1113	1522.89	2736.73	2882.13
WBGene00000227	atm-1	protein_coding	I	183364	208384	1445.35	1421.44	1558.17	1568.88	974.958	1227.55	2422.77	2396.05
WBGene00000228	atn-1	protein_coding	V	12478411	12484449	1600.16	1842.06	2274.56	2213.5	1450.57	1653.41	1039.77	1112.25
WBGene00000229	atp-2	protein_coding	III	5228417	5230536	21681.7	20705.6	27960.1	28174.4	14982.4	19633.4	23772.5	23829
WBGene00000230	atp-3	protein_coding	I	5428533	5429908	3826.77	3475.05	4092.51	4118.3	2956.15	3580.03	3667.48	3659.84
WBGene00000231	atx-2	protein_coding	III	10461389	10468051	2643.3	3002.47	4398.52	4483.28	2348.96	2871.33	4941.45	4923.63
WBGene00000232	avr-14	protein_coding	I	5967247	5973326	253.189	220.206	141.579	127.108	184.422	238.583	29.2752	14.2963
WBGene00000233	avr-15	protein_coding	V	13498780	13511718	244.508	237.526	120.329	110.766	166.088	189.199	53.5029	48.6073
WBGene00000235	baf-1	protein_coding	III	9467464	9468058	555.569	498.556	606.957	631.908	780.829	541.943	760.146	826.324
WBGene00000236	bag-1	protein_coding	I	6563629	6564451	403.656	321.649	341.862	314.138	388.258	323.562	581.466	663.347
WBGene00000237	bam-2	protein_coding	I	2949601	2957910	487.57	698.969	544.004	502.985	422.769	660.914	143.348	145.822
WBGene00000238	bar-1	protein_coding	X	7166005	7170625	153.36	226.392	213.564	245.137	194.129	215.494	60.5694	91.4961
WBGene00000239	bas-1	protein_coding	III	5612274	5614660	199.658	205.361	277.314	259.664	196.286	194.65	172.623	188.711
WBGene00000240	pah-1	protein_coding	II	8762622	8766997	1281.86	1124.54	735.521	717.252	702.099	844.661	555.219	649.051
WBGene00000241	bbs-1	protein_coding	I	14371138	14376086	44.8507	59.3814	28.6877	29.0533	35.5903	48.7428	2.01898	5.71851
WBGene00000242	bbs-2	protein_coding	IV	7934033	7937749	41.9571	45.7732	15.4064	14.5266	53.9247	49.3841	3.02847	0
WBGene00000244	bbs-8	protein_coding	V	6762467	6765072	33.2763	44.536	24.4377	27.2374	39.9042	65.7386	2.01898	0
WBGene00000245	bca-1	protein_coding	X	6201875	6204746	202.551	143.505	309.455	250.584	153.146	243.714	190.794	225.881
WBGene00000246	bcc-1	protein_coding	IV	11086074	11092552	76.6802	81.6494	65.3442	54.4749	62.5526	63.4939	25.2372	11.437
WBGene00000247	bec-1	protein_coding	IV	5661141	5664425	392.082	348.866	354.877	366.797	466.987	383.529	457.299	417.451
WBGene00000248	ben-1	protein_coding	III	3537642	3541639	625.016	771.958	678.942	764.464	571.601	662.838	471.432	523.243
WBGene00000249	bir-1	protein_coding	V	11644477	11645370	280.678	272.165	238.533	214.268	341.882	271.613	404.805	431.747
WBGene00000250	bir-2	protein_coding	V	13568850	13570030	331.316	230.103	292.455	319.586	251.289	251.089	562.286	637.614
WBGene00000251	bli-1	protein_coding	II	10708960	10712156	36.1699	45.7732	90.8444	94.4231	17.2559	42.0086	44.4175	65.7628
WBGene00000252	bli-2	protein_coding	II	5651394	5652434	14.468	13.6082	37.1878	38.1324	16.1774	13.7891	7.06643	22.874
WBGene00000253	bli-3	protein_coding	I	145968	154855	383.401	540.618	591.285	510.248	475.615	580.745	219.059	208.726
WBGene00000254	bli-4	protein_coding	I	6342224	6356680	2314.87	2693.19	3363.9	3233.99	2218.46	2633.71	3241.47	3273.85
WBGene00000255	bli-5	protein_coding	III	13427640	13429768	4.34039	2.47422	22.8439	16.3425	5.39247	5.45149	4.03796	5.71851
WBGene00000256	bli-6	protein_coding	IV	6377065	6378168	20.2551	14.8453	45.1566	58.1065	26.9623	42.0086	330.103	345.97
WBGene00000257	bmk-1	protein_coding	V	14453302	14456984	963.566	935.257	1104.21	1080.42	826.126	846.906	1683.83	1546.86
WBGene00000259	bpl-1	protein_coding	II	6274216	6279714	473.102	522.061	405.612	457.589	415.22	449.909	509.792	603.303
WBGene00000262	bra-1	protein_coding	X	13598449	13599687	85.3609	82.8865	47.2816	49.0274	84.1225	70.8694	29.2752	31.4518
WBGene00000263	F23H11.5	protein_coding	III	909957	910590	1487.31	1510.51	1412.07	1418.16	1234.87	1390.45	1584.9	1515.4
WBGene00000264	brc-1	protein_coding	III	3853102	3862968	418.124	385.979	385.159	374.061	325.705	321.959	738.946	783.435
WBGene00000265	brd-1	protein_coding	III	6885207	6889504	458.634	371.134	437.222	401.298	395.807	350.499	733.899	680.502
WBGene00000266	bre-1	protein_coding	IV	8987266	8990444	267.657	420.618	379.581	343.192	407.67	422.33	120.129	117.229
WBGene00000267	bre-2	protein_coding	III	13133906	13139626	59.3186	75.4639	31.344	38.1324	25.8838	50.9875	17.1613	11.437
WBGene00000268	bre-3	protein_coding	III	9469900	9485473	681.441	669.278	733.13	744.49	581.308	626.281	965.072	874.932
WBGene00000269	bre-4	protein_coding	I	1621314	1628486	167.828	192.99	227.908	248.769	169.323	163.545	213.002	174.414
WBGene00000270	bre-5	protein_coding	IV	12049850	12051215	138.892	141.031	120.86	116.213	153.146	115.123	232.183	191.57
WBGene00000271	brf-1	protein_coding	II	7305858	7308792	856.503	763.298	867.803	873.414	637.389	733.386	1474.86	1558.29
WBGene00000272	bro-1	protein_coding	I	5186926	5189240	7.23398	43.2989	13.0157	12.7108	24.8053	24.3714	0	2.85925
WBGene00000273	brp-1	protein_coding	III	12020552	12025321	6140.2	5096.9	3152.73	3212.2	3669.03	4999.98	2283.47	2215.92
WBGene00000274	btf-1	protein_coding	II	13200165	13215706	911.481	851.133	1273.68	1207.53	711.805	821.893	1748.44	1741.29
WBGene00000275	bub-1	protein_coding	I	7251941	7255223	1737.6	1545.15	2055.95	1982.89	1611.27	1428.61	3117.3	3110.87
WBGene00000276	byn-1	protein_coding	III	6932001	6935862	1254.37	1109.69	1128.91	1124	937.21	945.995	1117.5	1097.95
WBGene00000277	cab-1	protein_coding	X	12199655	12212901	2702.61	2543.5	1682.21	1732.3	1540.09	2074.13	420.957	457.481
WBGene00000279	cah-1	protein_coding	III	5083206	5085629	59.3186	70.5154	50.2035	43.5799	84.1225	69.9074	29.2752	45.7481
WBGene00000280	cah-2	protein_coding	II	7480751	7483109	69.4462	75.4639	39.5784	30.8691	48.5322	70.5488	5.04745	2.85925
WBGene00000281	cah-3	protein_coding	X	16487481	16489397	672.76	622.268	540.285	522.959	524.148	523.023	301.837	340.251
WBGene00000282	cah-4	protein_coding	X	13542574	13544599	1114.03	976.082	754.646	724.516	693.471	945.995	485.564	566.132
WBGene00000283	cah-5	protein_coding	X	7020033	7023950	232.934	274.639	309.19	305.059	223.248	265.841	250.353	283.066
WBGene00000284	cah-6	protein_coding	I	3628246	3631112	196.764	236.288	160.97	154.345	170.402	236.018	9.0854	11.437
WBGene00000285	cal-1	protein_coding	V	12514835	12517248	67.9994	79.1752	60.0317	54.4749	73.3375	66.38	17.1613	5.71851
WBGene00000286	cal-2	protein_coding	II	8960714	8961569	176.509	184.33	86.86	118.029	165.009	118.009	26.2467	62.9036
WBGene00000287	cal-3	protein_coding	IV	3829493	3835165	44.8507	44.536	33.7346	30.8691	24.8053	29.8229	6.05694	8.57776
WBGene00000288	cal-4	protein_coding	IV	10521406	10530598	243.062	195.464	122.72	88.9756	153.146	159.055	13.1234	20.0148
WBGene00000289	cam-1	protein_coding	II	9295915	9310304	1283.31	1692.37	1229.85	1222.05	1314.68	1510.38	1147.79	1126.55
WBGene00000292	cap-1	protein_coding	IV	7228422	7230223	897.013	969.896	784.927	808.044	896.228	785.015	976.176	1037.91
WBGene00000293	cap-2	protein_coding	II	10869196	10870827	1209.52	1077.52	996.632	929.704	1149.67	1033.54	1183.12	1069.36
WBGene00000294	cas-1	protein_coding	X	16807455	16813656	881.098	1125.77	1205.95	1074.97	854.167	938.619	742.984	777.717
WBGene00000295	cat-1	protein_coding	X	5705690	5710737	54.9782	70.5154	34.0002	38.1324	43.1397	58.6837	5.04745	17.1555
WBGene00000296	cat-2	protein_coding	II	257819	261074	18.8083	13.6082	34.0002	49.0274	20.4914	21.1646	5.04745	0
WBGene00000298	cat-4	protein_coding	V	10564880	10566464	376.167	310.515	235.611	196.11	399.042	295.984	360.388	411.733
WBGene00000301	cav-1	protein_coding	IV	9772510	9773559	519.4	1167.83	316.893	239.689	1411.75	815.479	338.179	291.644
WBGene00000302	cav-2	protein_coding	V	13557104	13559922	133.105	144.742	40.9065	36.3166	80.887	95.2408	18.1708	8.57776
WBGene00000308	C04A11.t1	tRNA	X	13665555	13665673	10.1276	6.18556	2.12501	1.81583	6.47096	7.05488	1.00949	2.85925
WBGene00000366	cbp-1	protein_coding	III	9766509	9774825	5340.12	6320.41	5919.49	6077.58	3380	5314.57	5650.11	6115.94
WBGene00000367	cca-1	protein_coding	X	7847678	7875954	616.335	707.628	524.879	550.196	421.691	645.521	99.9395	65.7628
WBGene00000368	ccb-1	protein_coding	I	3641651	3647082	350.125	501.031	330.971	374.061	325.705	477.166	82.7781	82.9184
WBGene00000369	ccf-1	protein_coding	III	11918828	11920237	1093.78	1005.77	1252.7	1338.27	805.634	981.269	1702	1686.96
WBGene00000370	ccg-1	protein_coding	IV	15270160	15275804	904.247	971.133	765.271	791.701	711.805	832.475	370.483	380.281
WBGene00000371	cox-5B	protein_coding	I	9788725	9790050	1945.94	2027.63	1632.01	1739.56	1834.52	1963.5	1917.02	1815.63
WBGene00000372	cyp-13A7	protein_coding	II	9803620	9805513	7.23398	13.6082	25.7658	30.8691	16.1774	9.29961	7.06643	17.1555
WBGene00000373	cyp-14A5	protein_coding	V	5421018	5423282	153.36	192.99	179.298	167.056	201.678	186.313	74.7022	117.229
WBGene00000374	cyp-31A1	pseudogene	IV	9101773	9103851	127.318	133.608	163.626	185.215	118.634	125.064	87.8256	68.6221
WBGene00000375	cyp-44A1	protein_coding	II	5504044	5505975	344.337	282.062	303.346	310.507	340.804	286.364	519.887	543.258
WBGene00000376	ccr-4	protein_coding	IV	12361542	12371852	3097.59	3063.09	3759.95	3702.48	2769.57	2905.97	5130.23	5023.71
WBGene00000377	cct-1	protein_coding	II	8185443	8187601	3405.76	3248.66	4726.56	4910	2543.09	2911.74	4373.11	4589.1
WBGene00000378	cct-2	protein_coding	II	8927741	8929815	3026.7	2815.67	3922.25	4027.51	2436.32	2602.93	4097.52	4294.6
WBGene00000379	cct-4	protein_coding	II	8283667	8285711	3117.84	2758.76	3676.28	3618.95	2783.59	2718.69	3750.25	4080.15
WBGene00000380	cct-5	protein_coding	III	4499188	4508114	4599.36	4167.83	5964.65	5923.23	3945.13	3964.84	5488.59	5781.41
WBGene00000381	cct-6	protein_coding	III	5853530	5855687	2957.25	2648.66	3752.78	3677.05	2609.95	2588.82	4014.74	4057.28
WBGene00000382	cdc-6	protein_coding	I	4268070	4270287	700.249	587.628	691.692	702.726	517.677	582.348	1134.67	1120.83
WBGene00000383	cdc-14	protein_coding	II	5589038	5593427	1812.83	1851.96	1258.54	1227.5	1403.12	1648.92	1835.25	1912.84
WBGene00000386	cdc-25.1	protein_coding	I	6469386	6471922	1724.58	1444.95	1674.25	1697.8	1281.25	1388.21	3451.44	3219.52
WBGene00000387	cdc-25.2	protein_coding	V	1567076	1585532	423.911	629.69	540.285	550.196	504.735	475.242	524.935	626.177
WBGene00000388	cdc-25.3	protein_coding	III	8916351	8917929	302.38	227.629	277.049	290.533	236.19	236.98	497.678	548.977
WBGene00000389	cdc-25.4	protein_coding	II	10188258	10189469	2.89359	1.23711	2.9219	5.44749	2.15699	6.41352	4.03796	5.71851
WBGene00000390	cdc-42	protein_coding	II	7616452	7618245	1756.41	1688.66	1904.81	1908.44	1615.58	1683.87	2320.82	2153.02
WBGene00000391	cdd-1	protein_coding	X	8208748	8211149	124.424	147.216	116.876	130.74	104.614	107.106	51.484	25.7333
WBGene00000392	cdd-2	protein_coding	IV	7547118	7547893	205.445	214.02	235.877	236.058	212.463	199.781	375.53	403.155
WBGene00000393	cdf-1	protein_coding	X	6499916	6505143	276.338	256.082	306.268	321.402	236.19	305.925	251.363	205.866
WBGene00000395	cdh-3	protein_coding	III	7741229	7754448	487.57	1104.74	569.77	493.905	426.005	804.256	204.926	168.696
WBGene00000396	cdh-4	protein_coding	III	4520357	4536994	3865.84	5428.45	4121.47	3891.32	3010.07	4940.66	3541.29	3411.09
WBGene00000397	cdh-5	protein_coding	IV	8668935	8676619	128.765	468.866	474.144	468.484	304.135	480.373	25.2372	28.5925
WBGene00000399	cdh-7	protein_coding	II	14843229	14850905	70.893	42.0618	809.365	864.335	18.3344	43.2913	3.02847	2.85925
WBGene00000401	cdh-9	protein_coding	X	16595231	16602245	66.5526	175.67	110.501	110.766	106.771	156.169	11.1044	2.85925
WBGene00000402	cdh-10	protein_coding	IV	2436498	2463369	115.744	40.8247	1008.05	1002.34	20.4914	53.2322	5.04745	20.0148
WBGene00000403	casy-1	protein_coding	II	5945405	5956683	2812.57	3168.24	1894.72	1830.36	2134.34	2748.19	391.682	408.873
WBGene00000405	cdk-1	protein_coding	III	9747472	9748852	1322.37	1128.25	1457.76	1430.87	1286.64	1056.95	2204.72	2427.51
WBGene00000406	cdk-4	protein_coding	X	13515856	13518911	111.403	105.155	111.032	116.213	138.047	89.7893	128.205	120.089
WBGene00000407	cdk-5	protein_coding	III	13464687	13466342	394.975	360	322.471	370.429	350.51	353.064	527.963	577.569
WBGene00000408	cdk-7	protein_coding	I	2281503	2291205	520.846	466.391	419.956	423.088	569.444	437.082	751.06	680.502
WBGene00000409	cdk-8	protein_coding	I	8702466	8705825	520.846	514.639	561.004	577.434	580.229	532.643	910.559	749.124
WBGene00000410	cdk-9	protein_coding	I	11323527	11333154	455.741	436.701	496.988	515.695	417.377	426.179	633.959	683.362
WBGene00000411	cdl-1	protein_coding	II	10785452	10787272	1455.48	1307.63	1667.07	1697.8	1529.3	1301.95	2825.56	2690.56
WBGene00000412	cdr-1	protein_coding	V	15921309	15922820	26.0423	30.9278	76.2349	67.1857	10.7849	14.4304	18.1708	11.437
WBGene00000413	cdt-1	protein_coding	I	3223160	3228104	570.037	629.69	603.77	575.618	490.714	516.289	1023.62	1012.18
WBGene00000414	cec-1	protein_coding	III	8426333	8428583	405.103	501.031	297.768	281.453	469.144	392.187	214.012	180.133
WBGene00000415	ced-1	protein_coding	I	11851554	11868105	1553.86	1616.91	1509.03	1481.72	1398.81	1329.84	1672.72	1586.89
WBGene00000416	ced-2	protein_coding	IV	1597318	1601621	452.847	476.288	545.863	582.881	437.868	413.031	937.816	843.48
WBGene00000417	ced-3	protein_coding	IV	13198261	13204137	1122.71	1045.36	1312.99	1294.69	899.463	991.851	2402.58	2401.77
WBGene00000418	ced-4	protein_coding	III	4852325	4855171	451.4	358.763	356.471	390.403	366.688	350.499	643.045	620.458
WBGene00000419	ced-5	protein_coding	IV	10484110	10492913	1610.28	1407.83	1615.01	1628.8	1096.83	1411.94	2548.96	2433.22
WBGene00000420	ced-6	protein_coding	III	5595771	5598061	580.165	604.948	559.145	615.566	556.502	588.12	885.322	817.747
WBGene00000421	ced-7	protein_coding	III	9570390	9580089	2698.27	2451.96	3062.68	2938.01	1797.85	2345.75	4163.13	4002.96
WBGene00000422	ced-8	protein_coding	X	8414006	8416919	39.0635	53.1958	33.2034	41.7641	52.8462	42.3293	47.446	31.4518
WBGene00000423	ced-9	protein_coding	III	10335172	10337522	658.292	671.752	702.583	711.805	683.765	565.352	1120.53	1100.81
WBGene00000424	ced-10	protein_coding	IV	3506328	3509527	549.782	656.907	650.786	639.172	518.755	540.019	746.013	737.687
WBGene00000425	ced-11	protein_coding	III	9119556	9125162	147.573	233.814	158.048	147.082	235.111	258.465	43.408	42.8888
WBGene00000426	ced-12	protein_coding	I	10222881	10227009	727.738	574.02	585.442	593.776	623.369	574.652	976.176	946.413
WBGene00000428	ceh-1	protein_coding	X	4653167	4654157	5.78718	4.94845	2.9219	3.63166	3.23548	7.37555	0	2.85925
WBGene00000429	ceh-2	protein_coding	I	6046788	6050451	15.9148	19.7938	17.797	12.7108	11.8634	14.4304	4.03796	0
WBGene00000430	ceh-5	protein_coding	I	9727169	9728034	4.34039	14.8453	12.4845	9.07914	19.4129	15.0718	9.0854	8.57776
WBGene00000431	ceh-6	protein_coding	I	8498112	8502604	60.7654	96.4948	57.1098	58.1065	60.3956	76.3209	4.03796	11.437
WBGene00000433	ceh-8	protein_coding	I	8245505	8250948	17.3615	32.1649	4.78128	3.63166	22.6484	18.9199	1.00949	2.85925
WBGene00000434	ceh-9	protein_coding	I	565284	566588	5.78718	9.8969	6.9063	1.81583	4.31397	6.09285	0	0
WBGene00000435	ceh-10	protein_coding	III	5799047	5801115	36.1699	39.5876	30.8127	16.3425	30.1978	25.9748	7.06643	5.71851
WBGene00000437	ceh-13	protein_coding	III	7555660	7558041	120.084	173.196	106.782	85.344	160.695	126.988	28.2657	31.4518
WBGene00000438	ceh-14	protein_coding	X	7527769	7532732	86.8077	103.917	59.5004	49.0274	46.3752	97.8062	13.1234	20.0148
WBGene00000439	ceh-16	protein_coding	III	8622735	8626314	31.8295	34.6391	22.8439	23.6058	26.9623	20.2026	9.0854	5.71851
WBGene00000440	ceh-17	protein_coding	I	4568765	4570027	15.9148	18.5567	9.82819	7.26332	12.9419	12.5064	0	0
WBGene00000441	ceh-18	protein_coding	X	3843367	3857797	454.294	493.608	419.425	399.482	330.019	474.28	89.8446	111.511
WBGene00000442	ceh-19	protein_coding	IV	7953500	7955949	21.7019	12.3711	6.37504	7.26332	15.0989	18.5992	8.07592	0
WBGene00000443	ceh-20	protein_coding	III	6979884	6981785	269.104	463.917	305.471	301.428	344.039	343.444	81.7686	85.7776
WBGene00000444	ceh-21	protein_coding	X	1848779	1852736	169.275	173.196	218.345	236.058	162.852	146.228	267.515	251.614
WBGene00000445	ceh-22	protein_coding	V	10671918	10675769	53.5314	66.8041	40.9065	47.2116	39.9042	51.6289	1.00949	0
WBGene00000446	ceh-23	protein_coding	III	7839592	7841491	39.0635	17.3196	23.3752	27.2374	23.7268	15.7131	1.00949	2.85925
WBGene00000447	ceh-24	protein_coding	V	13813231	13815350	20.2551	49.4845	12.7501	18.1583	22.6484	40.7259	1.00949	2.85925
WBGene00000448	pros-1	protein_coding	III	8067289	8071463	218.466	314.227	143.439	119.845	237.268	278.347	2.01898	0
WBGene00000449	ceh-27	protein_coding	V	11661549	11665102	105.616	101.443	54.7191	59.9224	90.5934	101.975	5.04745	2.85925
WBGene00000451	ceh-30	protein_coding	X	3063574	3065551	8.68077	30.9278	11.6876	5.44749	28.0408	29.5022	6.05694	2.85925
WBGene00000452	ceh-31	protein_coding	X	3068648	3070422	20.2551	27.2165	19.1251	27.2374	24.8053	35.9157	2.01898	0
WBGene00000453	ceh-32	protein_coding	V	11701764	11705400	293.699	482.474	196.298	192.478	358.06	399.562	40.3796	42.8888
WBGene00000454	ceh-33	protein_coding	V	5323194	5324666	18.8083	25.9794	11.6876	9.07914	14.0204	25.0127	1.00949	0
WBGene00000455	ceh-34	protein_coding	V	5315496	5319577	91.1481	153.402	52.5941	67.1857	79.8085	113.199	6.05694	5.71851
WBGene00000457	ceh-36	protein_coding	X	14183221	14186566	20.2551	30.9278	10.6251	3.63166	42.0612	22.768	2.01898	0
WBGene00000458	ceh-37	protein_coding	X	14197372	14208000	94.0417	147.216	90.0475	87.1598	90.5934	108.068	28.2657	37.1703
WBGene00000459	ceh-38	protein_coding	II	6951526	6955409	1351.31	1251.96	1256.95	1194.82	1037.51	1270.52	1862.51	1698.4
WBGene00000460	ceh-39	protein_coding	X	1853874	1856172	218.466	261.031	296.705	268.743	245.896	206.195	295.78	303.081
WBGene00000461	ceh-40	protein_coding	X	12318126	12320777	39.0635	34.6391	38.7815	41.7641	56.0816	38.4811	39.3701	40.0296
WBGene00000462	ceh-41	protein_coding	X	1846608	1848675	59.3186	76.701	92.9694	74.449	103.535	70.5488	95.9015	100.074
WBGene00000463	ceh-43	protein_coding	III	4446638	4449943	99.8289	210.309	73.5786	67.1857	203.835	158.414	33.3132	25.7333
WBGene00000464	ceh-44	protein_coding	III	2530620	2543068	428.251	624.742	424.472	352.271	426.005	513.082	307.894	328.814
WBGene00000465	cpg-1	protein_coding	III	4489359	4491392	11711.8	11225.6	18571.3	18105.6	8591.28	10421.3	32356.2	32218.1
WBGene00000466	cel-1	protein_coding	I	9665251	9668650	642.377	550.515	567.91	552.012	572.68	536.171	938.825	914.961
WBGene00000467	cep-1	protein_coding	I	8324286	8328859	520.846	384.742	457.941	466.668	516.598	416.558	880.275	869.213
WBGene00000468	ces-1	protein_coding	I	8633897	8636169	5.78718	18.5567	8.76569	9.07914	15.0989	10.903	1.00949	2.85925
WBGene00000469	ces-2	protein_coding	I	14961497	14965361	34.7231	142.268	12.2188	18.1583	104.614	65.4179	8.07592	11.437
WBGene00000472	cey-1	protein_coding	II	11039348	11041206	4246.34	6188.04	4807.85	4851.9	4185.63	5168.02	3855.24	4045.84
WBGene00000473	cey-2	protein_coding	I	5619569	5620669	10182.5	9299.37	11318.1	11167.3	9730.16	8289.16	18635.2	19811.8
WBGene00000474	cey-3	protein_coding	I	5571796	5572949	4116.13	3618.55	4081.36	4031.14	5175.69	3066.63	7456.09	7557.01
WBGene00000475	cey-4	protein_coding	III	10866946	10868703	3807.97	3666.8	4881.69	5133.35	3125.47	3305.53	6215.43	6496.22
WBGene00000476	cfi-1	protein_coding	I	9993906	9999928	231.487	350.103	168.939	187.03	202.757	308.811	13.1234	11.437
WBGene00000477	cft-1	protein_coding	V	5538800	5545789	105.616	110.103	111.032	125.292	90.5934	102.296	19.1803	28.5925
WBGene00000478	cfz-2	protein_coding	V	3441504	3444877	222.807	398.35	149.548	130.74	287.958	327.09	23.2183	11.437
WBGene00000479	cgh-1	protein_coding	III	7495320	7497832	14167	11849.1	14556.1	14234.3	10856.1	12128.6	26314.4	26776.9
WBGene00000480	cgp-1	protein_coding	V	118202	122789	1105.35	1174.02	1444.48	1541.64	1119.48	1084.85	2113.87	2238.8
WBGene00000481	cha-1	protein_coding	IV	3613931	3624697	162.041	173.196	99.8757	99.8706	95.9859	127.95	8.07592	17.1555
WBGene00000482	chd-3	protein_coding	X	12846439	12852601	1177.69	1562.47	1448.99	1425.43	1097.91	1163.73	664.244	734.828
WBGene00000483	che-1	protein_coding	I	6517529	6520918	2.89359	2.47422	2.9219	3.63166	0	1.2827	1.00949	0
WBGene00000484	che-2	protein_coding	X	481450	486504	34.7231	75.4639	24.7033	23.6058	45.2967	62.2112	0	0
WBGene00000485	che-3	protein_coding	I	8062007	8081671	315.401	476.288	278.111	306.875	267.466	493.2	28.2657	40.0296
WBGene00000487	che-6	protein_coding	IV	2104056	2111408	10.1276	16.0825	3.71878	0	5.39247	7.37555	1.00949	5.71851
WBGene00000488	che-7	protein_coding	V	7961210	7969207	59.3186	95.2577	43.5628	38.1324	64.7096	86.5826	3.02847	2.85925
WBGene00000490	che-11	protein_coding	V	12144244	12150707	86.8077	128.66	52.5941	43.5799	76.573	139.173	4.03796	0
WBGene00000491	che-12	protein_coding	V	10299472	10307383	134.552	179.381	71.9849	78.0806	113.242	149.435	8.07592	2.85925
WBGene00000492	che-13	protein_coding	I	10506998	10515586	33.2763	37.1134	19.1251	7.26332	32.3548	44.2533	7.06643	2.85925
WBGene00000493	che-14	protein_coding	I	5746633	5754306	36.1699	84.1236	139.72	119.845	98.1429	102.296	10.0949	31.4518
WBGene00000496	chs-1	protein_coding	I	7554855	7559916	4728.13	3835.05	5116.77	4926.34	3568.73	3989.85	9692.11	9675.71
WBGene00000497	chs-2	protein_coding	II	196985	211941	175.062	494.845	741.63	677.304	375.316	692.66	92.873	68.6221
WBGene00000498	chk-1	protein_coding	V	3757153	3759469	642.377	618.556	827.959	804.412	726.904	535.208	1258.83	1352.43
WBGene00000499	chk-2	protein_coding	V	19908086	19916023	351.571	293.196	447.316	421.272	224.327	271.613	735.918	834.902
WBGene00000500	chn-1	protein_coding	I	6181314	6183856	506.378	436.701	412.784	399.482	626.604	415.596	673.329	649.051
WBGene00000501	cho-1	protein_coding	IV	13209730	13214566	169.275	184.33	107.313	108.95	133.733	138.211	10.0949	2.85925
WBGene00000502	chp-1	protein_coding	I	5103581	5104911	464.421	491.134	523.285	512.064	510.127	440.93	690.491	777.717
WBGene00000503	cht-1	protein_coding	X	3397613	3400017	303.827	593.814	264.299	274.19	829.361	541.301	368.464	237.318
WBGene00000506	cic-1	protein_coding	III	2394325	2401221	244.508	186.804	163.361	203.373	163.931	177.013	310.923	263.051
WBGene00000507	cit-1.1	protein_coding	III	8005933	8009821	392.082	366.185	440.675	435.799	255.603	345.368	659.197	649.051
WBGene00000508	cit-1.2	protein_coding	III	8010772	8013769	617.782	689.072	689.567	644.619	596.407	601.909	772.259	734.828
WBGene00000509	cka-1	protein_coding	IV	9731737	9737621	552.676	524.536	506.816	528.406	487.479	473.639	606.703	637.614
WBGene00000510	cka-2	protein_coding	X	4286124	4291496	135.999	133.608	113.157	107.134	91.6719	136.287	22.2088	28.5925
WBGene00000511	ckb-1	protein_coding	III	4365274	4367469	56.425	53.1958	58.9692	72.6332	33.4333	51.9495	35.3321	34.311
WBGene00000512	ckb-2	protein_coding	III	4367949	4370160	99.8289	82.8865	96.1569	90.7914	112.163	82.7344	117.101	102.933
WBGene00000513	ckb-3	protein_coding	III	4370885	4372820	11.5744	3.71134	5.84379	3.63166	4.31397	6.7342	0	0
WBGene00000514	ckb-4	protein_coding	V	2106398	2109434	65.1058	86.5979	181.423	217.899	75.4945	75.6796	88.8351	80.0591
WBGene00000515	ckc-1	protein_coding	X	3576606	3578830	164.935	143.505	173.454	152.53	80.887	134.684	168.585	188.711
WBGene00000516	cki-1	protein_coding	II	7811240	7812105	167.828	267.216	114.751	116.213	218.934	184.068	32.3037	22.874
WBGene00000517	cki-2	protein_coding	II	7816499	7820281	422.464	416.907	435.362	403.114	344.039	390.263	651.121	757.702
WBGene00000518	ckk-1	protein_coding	III	5635479	5654564	182.296	269.691	132.017	148.898	167.166	216.456	31.2942	48.6073
WBGene00000519	cku-70	protein_coding	III	11154827	11168817	526.634	503.505	583.848	548.38	489.636	430.989	872.199	932.117
WBGene00000520	cku-80	protein_coding	III	4419848	4423375	706.036	487.422	567.645	579.249	651.41	529.436	1040.78	1000.74
WBGene00000521	cky-1	protein_coding	V	12736703	12741205	5.78718	65.567	57.1098	43.5799	29.1193	54.8356	0	0
WBGene00000522	clc-1	protein_coding	X	11047446	11049275	144.68	89.0721	118.204	101.686	209.228	121.857	119.12	94.3554
WBGene00000523	clc-2	protein_coding	X	7431465	7433535	37.6167	61.8556	39.0471	49.0274	47.4537	43.612	18.1708	11.437
WBGene00000524	clc-3	protein_coding	X	3373236	3374742	39.0635	49.4845	44.6253	32.6849	42.0612	54.8356	16.1518	20.0148
WBGene00000525	clc-4	protein_coding	X	10782927	10783922	0	1.23711	4.25003	3.63166	15.0989	10.5823	0	0
WBGene00000526	clc-5	protein_coding	X	7433569	7435736	88.2545	96.4948	57.641	54.4749	75.4945	74.7175	10.0949	25.7333
WBGene00000527	cle-1	protein_coding	I	8705668	8724279	551.229	621.03	457.144	506.616	448.653	560.542	510.802	551.836
WBGene00000528	clh-1	protein_coding	II	11846507	11856461	685.781	750.927	601.379	653.698	623.369	675.665	416.919	397.436
WBGene00000529	clh-2	protein_coding	II	11351899	11370316	176.509	181.856	131.22	116.213	116.477	137.57	8.07592	34.311
WBGene00000530	clh-3	protein_coding	II	7217943	7225914	308.167	284.536	335.487	359.534	222.17	253.334	428.024	468.918
WBGene00000531	clh-4	protein_coding	X	4094867	4100573	53.5314	54.4329	55.2504	63.554	26.9623	50.6668	11.1044	11.437
WBGene00000532	clh-5	protein_coding	II	9094710	9098605	870.971	879.587	1020.27	1011.42	743.082	795.918	1350.7	1235.2
WBGene00000533	clh-6	protein_coding	V	12060234	12063368	575.825	581.443	608.551	590.144	491.793	479.732	895.417	857.776
WBGene00000534	cpi-2	protein_coding	V	6044062	6045664	863.737	883.298	719.583	702.726	1040.75	940.543	965.072	943.554
WBGene00000535	cpi-1	protein_coding	IV	6092603	6093680	666.973	315.464	313.705	259.664	401.199	466.904	470.422	400.296
WBGene00000536	clk-1	protein_coding	III	5277894	5279344	146.126	191.752	156.985	143.45	177.951	167.072	191.803	200.148
WBGene00000537	clk-2	protein_coding	III	7515222	7518524	581.612	496.082	593.676	568.354	442.182	499.293	1000.4	952.131
WBGene00000539	cln-3.1	protein_coding	V	11263330	11265652	95.4885	79.1752	74.9068	107.134	135.89	93.9581	70.6643	45.7481
WBGene00000540	cln-3.2	protein_coding	I	5274693	5278708	137.446	148.453	134.407	119.845	139.126	141.098	183.727	180.133
WBGene00000541	cln-3.3	protein_coding	V	8683052	8686160	137.446	118.763	101.204	147.082	94.9074	92.3547	36.3416	28.5925
WBGene00000542	clp-1	protein_coding	III	7979959	7986380	2689.59	2501.44	2462.1	2467.71	1812.95	2263.33	1960.43	1855.66
WBGene00000543	clp-2	protein_coding	III	4700325	4704025	425.358	393.402	427.659	408.562	364.531	384.17	676.358	683.362
WBGene00000544	clp-3	protein_coding	I	12073072	12084225	2.89359	7.42267	10.8907	10.895	12.9419	17.3165	19.1803	20.0148
WBGene00000545	clp-4	protein_coding	III	1807740	1818323	580.165	570.309	495.66	488.458	411.984	466.584	295.78	297.362
WBGene00000546	clp-6	protein_coding	IV	1431190	1435039	8.68077	6.18556	11.6876	7.26332	11.8634	17.9579	50.4745	31.4518
WBGene00000547	clp-7	protein_coding	IV	1435465	1445966	792.844	837.525	1081.63	1185.74	746.317	811.631	1247.73	1158
WBGene00000548	clr-1	protein_coding	II	5466358	5473816	2060.24	2254.02	2230.2	2113.62	1611.27	2090.49	2945.69	3087.99
WBGene00000549	cls-2	protein_coding	III	9055048	9058895	1171.9	1138.14	1697.09	1688.72	821.812	1059.83	1759.54	2047.23
WBGene00000550	clu-1	protein_coding	III	9516631	9521460	4571.87	4196.29	6308.9	6279.14	3120.08	4093.75	6346.66	6739.26
WBGene00000551	clx-1	protein_coding	IV	7734648	7736324	0	0	36.9221	25.4216	0	0	0	0
WBGene00000552	cmd-1	protein_coding	V	1156271	1158189	4308.56	5051.13	4739.05	4628.55	3306.66	4356.06	3556.43	3651.27
WBGene00000553	cmk-1	protein_coding	IV	1824481	1834247	280.678	379.794	206.392	203.373	210.306	334.145	8.07592	20.0148
WBGene00000554	cnb-1	protein_coding	V	11375742	11378006	480.336	556.701	349.565	328.665	507.97	553.487	111.044	140.103
WBGene00000556	cnc-2	protein_coding	V	1449665	1450183	7.23398	13.6082	20.9845	21.7899	8.62794	8.65826	19.1803	20.0148
WBGene00000557	cnc-3	protein_coding	V	1448004	1448792	24.5955	33.402	99.8757	83.5281	43.1397	46.8187	17.1613	20.0148
WBGene00000558	cnc-4	protein_coding	V	1447195	1447707	11.5744	33.402	51.266	36.3166	39.9042	45.8567	24.2277	20.0148
WBGene00000560	cnc-6	protein_coding	III	1763522	1764902	2.89359	4.94845	1.32813	3.63166	4.31397	3.20676	1.00949	0
WBGene00000561	cnd-1	protein_coding	III	5240591	5244639	7.23398	33.402	9.56257	10.895	30.1978	21.806	2.01898	0
WBGene00000562	cng-1	protein_coding	V	15025731	15031473	23.1487	34.6391	22.047	29.0533	21.5699	24.0507	15.1423	5.71851
WBGene00000563	cng-3	protein_coding	IV	9477522	9481037	8.68077	14.8453	14.3439	7.26332	17.2559	19.5612	1.00949	2.85925
WBGene00000564	cnk-1	protein_coding	III	10271257	10278579	611.995	773.195	754.646	720.884	595.328	637.504	1021.6	1083.66
WBGene00000565	cnt-1	protein_coding	II	12072170	12088868	606.207	593.814	756.24	759.017	545.717	621.791	829.8	700.517
WBGene00000566	cnt-2	protein_coding	III	10655018	10677523	1141.52	1358.35	1321.49	1260.19	1199.28	1210.87	1275.99	1306.68
WBGene00000567	cnx-1	protein_coding	III	9814364	9817137	2115.22	2079.59	2156.36	2051.89	1922.95	1877.56	2476.28	2458.96
WBGene00000583	cof-2	protein_coding	I	6250475	6252876	23.1487	37.1134	29.7502	39.9482	33.4333	40.4052	4.03796	2.85925
WBGene00000584	cog-1	protein_coding	II	14902493	14907533	41.9571	72.9896	38.7815	67.1857	53.9247	71.5108	7.06643	17.1555
WBGene00000585	cogc-2	protein_coding	IV	7036957	7039580	766.802	669.278	797.677	735.411	674.058	650.011	1190.19	1112.25
WBGene00000591	coh-1	protein_coding	X	7465193	7475018	379.06	587.628	498.847	452.141	399.042	452.153	370.483	363.125
WBGene00000592	coh-3	protein_coding	V	14457422	14460141	377.614	337.732	400.034	423.088	290.115	321.638	722.794	792.013
WBGene00000593	col-2	protein_coding	IV	10084439	10085451	15.9148	2.47422	125.907	147.082	0	9.29961	0	0
WBGene00000594	col-3	protein_coding	IV	8824783	8826013	177.956	216.495	411.456	423.088	126.184	132.76	19.1803	31.4518
WBGene00000596	col-7	protein_coding	I	7401132	7402761	0	2.47422	0.265627	5.44749	4.31397	4.81014	81.7686	85.7776
WBGene00000597	col-8	protein_coding	III	7019583	7020600	1986.45	1960.82	335.221	394.035	2160.22	2312.4	5465.38	5566.97
WBGene00000599	col-10	protein_coding	V	9164292	9165307	892.673	1000.82	1582.34	1543.45	548.953	860.695	58.5504	48.6073
WBGene00000601	col-12	protein_coding	V	10423898	10425198	83.9141	94.0205	326.19	343.192	183.344	134.684	199.879	234.459
WBGene00000602	col-13	protein_coding	V	10420788	10421902	11.5744	8.65979	162.564	190.662	22.6484	17.9579	102.968	108.652
WBGene00000603	col-14	protein_coding	IV	7753408	7754656	198.211	458.969	902.069	915.178	595.328	844.661	187.765	197.288
WBGene00000606	col-17	protein_coding	II	4866436	4867576	209.785	89.0721	8221.95	8394.58	39.9042	91.072	41.3891	120.089
WBGene00000608	col-19	protein_coding	X	421707	422691	2118.11	1973.19	553.566	655.514	2585.15	2593.95	7993.14	8220.35
WBGene00000609	col-20	protein_coding	II	4869670	4870791	4822.17	4156.7	499.113	526.59	4062.68	5544.17	12399.6	12640.8
WBGene00000610	col-33	protein_coding	IV	4263293	4265223	7.23398	8.65979	56.5785	63.554	12.9419	14.7511	2.01898	0
WBGene00000611	col-34	protein_coding	IV	4243545	4244610	105.616	170.722	358.065	388.587	147.754	214.212	66.6263	65.7628
WBGene00000612	col-35	protein_coding	I	7385907	7386935	10.1276	3.71134	9.03131	19.9741	1.07849	3.20676	1.00949	0
WBGene00000613	col-36	protein_coding	II	7167511	7168812	52.0846	1.23711	78.3599	79.8965	5.39247	16.3545	3.02847	0
WBGene00000614	col-37	protein_coding	V	12166706	12167753	11.5744	1.23711	95.8913	92.6073	0	5.45149	2.01898	0
WBGene00000615	col-38	protein_coding	II	8568035	8569088	27.4891	34.6391	74.1099	70.8173	49.6107	45.536	174.642	285.925
WBGene00000616	col-39	protein_coding	II	10704916	10706019	1656.58	2065.98	2061	2189.89	1191.73	1337.86	668.282	600.443
WBGene00000617	col-40	protein_coding	II	1104942	1106964	24.5955	2.47422	164.423	196.11	1.07849	11.2237	5.04745	0
WBGene00000618	col-41	protein_coding	X	15175032	15176481	170.722	65.567	5059.13	5156.95	23.7268	69.5867	9.0854	17.1555
WBGene00000620	col-43	protein_coding	V	8049703	8050911	78.127	18.5567	88.7194	125.292	1.07849	23.73	22.2088	8.57776
WBGene00000621	col-44	protein_coding	X	13591475	13592543	2.89359	1.23711	10.3594	16.3425	3.23548	2.56541	1.00949	0
WBGene00000622	col-45	protein_coding	I	115687	117498	13.0212	2.47422	9.82819	9.07914	3.23548	1.92406	9.0854	2.85925
WBGene00000623	col-46	protein_coding	I	741878	747213	10.1276	16.0825	121.126	121.661	5.39247	15.7131	2.01898	2.85925
WBGene00000624	col-47	protein_coding	I	745888	748288	1.4468	0	4.78128	7.26332	0	0.962028	0	0
WBGene00000625	col-48	protein_coding	I	3010684	3011665	144.68	315.464	537.894	542.933	375.316	454.398	76.7212	97.2146
WBGene00000626	col-49	protein_coding	I	3137185	3138447	10.1276	11.134	15.1407	12.7108	15.0989	18.2785	61.5789	85.7776
WBGene00000627	col-50	protein_coding	I	3651236	3652702	4.34039	1.23711	71.9849	69.0015	1.07849	4.81014	0	5.71851
WBGene00000628	col-51	protein_coding	I	3653997	3655265	4.34039	4.94845	75.1724	54.4749	3.23548	2.88609	3.02847	0
WBGene00000629	col-52	protein_coding	I	4571192	4575038	1.4468	3.71134	7.43755	5.44749	5.39247	2.88609	1.00949	0
WBGene00000630	col-53	protein_coding	I	5644729	5646370	24.5955	32.1649	25.2346	23.6058	42.0612	36.2364	3.02847	5.71851
WBGene00000631	col-54	protein_coding	I	5842709	5844050	21.7019	38.3505	379.05	361.35	61.4741	65.4179	1.00949	0
WBGene00000633	col-56	protein_coding	I	6232777	6234280	7.23398	9.8969	7.96881	5.44749	10.7849	10.2616	0	0
WBGene00000634	col-58	protein_coding	I	6311229	6312416	18.8083	60.6185	81.0162	76.2648	71.1805	98.4476	10.0949	2.85925
WBGene00000636	col-60	protein_coding	I	7105302	7106926	5.78718	3.71134	7.70318	1.81583	31.2763	11.865	141.329	102.933
WBGene00000637	col-61	protein_coding	I	7202205	7203533	1.4468	4.94845	27.3596	32.6849	7.54945	11.5443	3.02847	5.71851
WBGene00000638	col-62	protein_coding	I	7403291	7404374	0	3.71134	2.65627	1.81583	6.47096	10.2616	74.7022	65.7628
WBGene00000639	col-63	protein_coding	I	8243694	8244963	13.0212	21.0309	35.8596	38.1324	29.1193	23.73	64.6073	91.4961
WBGene00000640	col-64	protein_coding	I	9893621	9895766	4.34039	2.47422	5.04691	3.63166	4.31397	4.16879	3.02847	2.85925
WBGene00000641	col-65	protein_coding	I	11489158	11490578	261.87	676.701	669.645	606.487	758.181	984.796	60.5694	65.7628
WBGene00000644	col-68	protein_coding	II	104534	105829	14.468	24.7422	34.7971	32.6849	17.2559	17.3165	10.0949	25.7333
WBGene00000645	col-69	protein_coding	II	303881	305745	20.2551	24.7422	28.6877	23.6058	28.0408	32.709	4.03796	0
WBGene00000647	col-71	protein_coding	II	3500077	3502570	33.2763	59.3814	103.329	145.266	52.8462	64.7766	246.315	300.222
WBGene00000648	col-72	protein_coding	II	3520703	3524197	2.89359	4.94845	9.56257	5.44749	2.15699	1.92406	0	5.71851
WBGene00000649	col-73	protein_coding	II	4872098	4873129	105.616	66.8041	4296.78	4296.25	98.1429	83.0551	237.23	325.955
WBGene00000650	col-74	protein_coding	II	5830374	5832022	813.099	2480.41	180.892	183.399	1975.8	3381.53	20.1898	8.57776
WBGene00000651	col-75	protein_coding	II	6426293	6427513	2.89359	7.42267	7.17193	12.7108	10.7849	9.62028	0	0
WBGene00000652	col-76	protein_coding	II	8204339	8207495	172.169	549.278	266.158	241.505	345.118	388.018	101.958	111.511
WBGene00000653	col-77	protein_coding	II	8358228	8359381	199.658	435.464	695.677	691.831	600.721	666.686	402.786	451.762
WBGene00000655	col-79	protein_coding	II	10703613	10704572	2.89359	6.18556	17.797	21.7899	4.31397	7.69623	3.02847	0
WBGene00000656	col-80	protein_coding	II	10707201	10708287	2100.75	2020.2	1105.01	946.047	1342.72	2464.08	9847.57	10196.1
WBGene00000657	col-81	protein_coding	II	11012397	11013767	149.02	189.278	58.1723	83.5281	223.248	287.647	3778.52	3574.07
WBGene00000658	col-83	protein_coding	II	11044074	11045972	2.89359	0	3.18752	9.07914	3.23548	6.09285	0	5.71851
WBGene00000659	col-84	protein_coding	II	11868534	11869682	26.0423	13.6082	58.1723	59.9224	5.39247	19.2406	22.2088	25.7333
WBGene00000660	col-85	protein_coding	II	12493703	12495095	1.4468	2.47422	93.5007	118.029	4.31397	7.05488	5.04745	5.71851
WBGene00000661	col-86	protein_coding	II	13096009	13098275	1.4468	3.71134	1.32813	5.44749	6.47096	0.962028	4.03796	0
WBGene00000662	col-87	protein_coding	II	14089851	14094690	2.89359	6.18556	9.03131	3.63166	2.15699	6.09285	7.06643	5.71851
WBGene00000663	col-88	protein_coding	III	41063	41971	11.5744	11.134	8.23443	7.26332	51.7677	11.2237	241.268	251.614
WBGene00000664	col-89	protein_coding	III	4748127	4749164	30.3827	60.6185	69.063	76.2648	52.8462	72.4728	10.0949	11.437
WBGene00000665	col-90	protein_coding	III	7948838	7950068	120.084	33.402	3165.21	3301.18	12.9419	33.3503	20.1898	45.7481
WBGene00000666	col-91	protein_coding	III	8262355	8263664	86.8077	69.2783	287.143	292.348	112.163	78.8863	143.348	108.652
WBGene00000667	col-92	protein_coding	III	10982139	10983253	65.1058	50.7216	333.627	339.56	65.7881	73.4348	381.587	323.096
WBGene00000668	col-93	protein_coding	III	10984552	10985609	649.611	750.927	884.537	927.889	450.81	772.509	3934.99	4174.51
WBGene00000669	col-94	protein_coding	III	10986808	10987873	33.2763	59.3814	2.65627	5.44749	20.4914	42.9706	21.1993	14.2963
WBGene00000670	col-95	protein_coding	III	11703994	11705091	2822.7	1782.68	2615.1	2667.45	1321.15	2230.62	2801.33	2453.24
WBGene00000671	col-96	protein_coding	III	11705652	11706765	54.9782	42.0618	24.9689	43.5799	50.6892	64.4559	232.183	257.333
WBGene00000672	col-97	protein_coding	III	12992405	12993707	188.083	476.288	997.694	935.152	570.523	721.842	199.879	265.911
WBGene00000673	col-98	protein_coding	III	13019008	13020226	1432.33	1499.38	1215.51	1267.45	821.812	1393.34	2993.14	3373.92
WBGene00000674	col-99	protein_coding	IV	137974	147919	156.254	350.103	323.799	301.428	280.408	346.972	41.3891	45.7481
WBGene00000675	col-101	protein_coding	IV	325435	327020	2759.04	1850.72	2466.08	2543.98	1735.3	2222.61	6764.59	6584.86
WBGene00000676	col-102	protein_coding	IV	604444	605931	8.68077	0	50.2035	83.5281	0	8.97893	0	0
WBGene00000677	col-103	protein_coding	IV	762413	763678	1928.58	1898.97	1521.51	1648.77	937.21	1702.47	3247.53	3542.62
WBGene00000678	col-104	protein_coding	IV	1353636	1355305	130.212	294.433	644.411	713.621	497.185	548.677	131.234	160.118
WBGene00000679	col-105	protein_coding	IV	1357736	1359225	4.34039	18.5567	11.1563	14.5266	23.7268	20.8439	3.02847	0
WBGene00000680	col-106	protein_coding	IV	1459896	1460786	2944.23	2366.6	1498.93	1568.88	2754.47	3014.36	6171.01	6802.16
WBGene00000681	col-107	protein_coding	IV	1548721	1549714	3232.14	4291.54	4431.98	4650.34	2721.04	3344.97	251.363	271.629
WBGene00000682	col-108	protein_coding	IV	1768588	1769702	1.4468	0	8.76569	12.7108	1.07849	5.45149	0	0
WBGene00000683	col-109	protein_coding	IV	1817392	1820253	133.105	381.031	652.911	680.936	334.333	567.597	64.6073	122.948
WBGene00000684	col-110	protein_coding	IV	4608201	4609668	1.4468	2.47422	21.2501	25.4216	3.23548	8.97893	11.1044	14.2963
WBGene00000685	col-111	protein_coding	IV	4655791	4657974	27.4891	47.0103	404.815	403.114	63.6311	57.0804	28.2657	62.9036
WBGene00000687	col-113	protein_coding	IV	7150663	7152509	39.0635	84.1236	125.907	152.53	154.225	184.068	37.3511	28.5925
WBGene00000688	col-114	protein_coding	IV	7245460	7246653	2.89359	1.23711	2.9219	5.44749	1.07849	1.60338	0	0
WBGene00000689	col-115	protein_coding	IV	7988685	7991428	59.3186	102.68	129.892	125.292	175.794	193.047	10.0949	20.0148
WBGene00000690	col-116	protein_coding	IV	8355906	8357919	17.3615	7.42267	3.71878	7.26332	6.47096	13.1477	7.06643	5.71851
WBGene00000691	col-117	protein_coding	IV	8822962	8824195	147.573	137.319	318.752	241.505	105.692	101.334	10.0949	31.4518
WBGene00000692	col-118	protein_coding	IV	8848218	8849673	285.019	304.33	303.877	328.665	263.152	313.301	175.651	197.288
WBGene00000693	col-119	protein_coding	IV	8978926	8979795	9926.46	8795.87	3574.81	3657.08	6834.41	11216	19126.8	19645.9
WBGene00000694	col-120	protein_coding	IV	9260610	9261787	8.68077	6.18556	7.17193	9.07914	23.7268	13.4684	116.091	180.133
WBGene00000695	col-121	protein_coding	IV	9394873	9396218	67.9994	361.237	14.0782	19.9741	228.641	195.933	0	2.85925
WBGene00000696	col-122	protein_coding	IV	9563379	9564441	5447.19	4943.5	3455.81	3562.66	4398.09	6133.89	13274.8	14041.8
WBGene00000697	col-123	protein_coding	IV	9821921	9823156	10.1276	7.42267	22.5783	21.7899	4.31397	10.5823	4.03796	5.71851
WBGene00000698	col-124	protein_coding	IV	10216451	10217617	1919.9	1865.57	196.83	192.478	2397.49	2532.38	11201.3	12429.2
WBGene00000699	col-125	protein_coding	IV	11225506	11226516	1001.18	1812.37	8816.69	9013.78	1519.6	1978.25	607.713	568.991
WBGene00000701	col-127	protein_coding	IV	11264908	11266190	0	0	1.32813	1.81583	0	0.962028	1.00949	0
WBGene00000702	col-128	protein_coding	IV	11550002	11551960	15.9148	14.8453	127.235	139.819	5.39247	7.69623	1.00949	0
WBGene00000703	col-129	protein_coding	IV	12108734	12110439	214.126	222.68	61.3598	87.1598	309.528	324.524	3745.21	3777.07
WBGene00000704	col-130	protein_coding	IV	12427505	12428516	175.062	257.319	835.396	869.782	298.743	376.474	120.129	120.089
WBGene00000705	col-131	protein_coding	IV	13065729	13067300	18.8083	42.0618	82.3443	99.8706	53.9247	52.2702	2.01898	0
WBGene00000706	col-132	protein_coding	IV	13089643	13091067	0	0	0.531254	5.44749	2.15699	2.56541	1.00949	0
WBGene00000707	col-133	protein_coding	IV	14098325	14099356	18.8083	17.3196	211.97	150.714	60.3956	31.1056	707.652	731.969
WBGene00000708	col-135	protein_coding	IV	15129655	15131797	124.424	129.897	23.1095	16.3425	168.245	109.351	111.044	128.666
WBGene00000710	col-137	protein_coding	IV	16601480	16602776	0	3.71134	2.65627	0	4.31397	0.320676	56.5314	45.7481
WBGene00000711	col-138	protein_coding	IV	17182884	17183729	28.9359	33.402	71.4536	92.6073	47.4537	57.7217	202.907	300.222
WBGene00000712	col-139	protein_coding	V	4652863	4653971	319.742	269.691	83.9381	98.0548	337.568	385.132	4104.58	4005.81
WBGene00000713	col-140	protein_coding	V	5835855	5836834	5743.78	5479.17	2228.61	2197.15	5066.76	6802.5	14720.4	15119.7
WBGene00000714	col-141	protein_coding	V	6829704	6830739	5.78718	4.94845	19.922	30.8691	5.39247	4.81014	16.1518	28.5925
WBGene00000715	col-142	protein_coding	V	6831177	6832256	237.274	220.206	284.221	263.295	232.955	328.052	1353.73	1378.16
WBGene00000716	col-143	protein_coding	V	6835635	6836704	2406.02	1990.51	2423.31	2469.53	1286.64	2395.13	6775.69	7188.16
WBGene00000717	col-144	protein_coding	V	9159586	9160642	1336.84	1411.55	3061.88	2934.38	986.821	1325.68	142.338	165.837
WBGene00000718	col-145	protein_coding	V	9161992	9163005	23.1487	32.1649	306.799	317.77	40.9827	37.5191	169.594	174.414
WBGene00000719	col-146	protein_coding	V	9629943	9631012	27.4891	24.7422	252.346	245.137	24.8053	23.73	159.499	140.103
WBGene00000720	col-147	protein_coding	V	9632029	9633338	1373.01	1417.73	1477.95	1579.77	931.818	974.856	405.815	385.999
WBGene00000722	col-149	protein_coding	V	10291701	10292869	183.743	91.5463	1184.96	1104.02	53.9247	97.8062	394.71	420.31
WBGene00000723	col-150	protein_coding	V	10293563	10294649	13.0212	27.2165	53.9223	65.3698	11.8634	28.8609	53.5029	77.1998
WBGene00000724	col-151	protein_coding	V	10393531	10395223	1.4468	1.23711	2.65627	7.26332	0	2.56541	0	2.85925
WBGene00000725	col-152	protein_coding	V	10560921	10562252	1.4468	1.23711	2.12501	0	1.07849	0.962028	3.02847	2.85925
WBGene00000726	col-153	protein_coding	V	10949811	10951821	54.9782	39.5876	86.0631	88.9756	47.4537	56.439	18.1708	20.0148
WBGene00000727	col-154	protein_coding	V	11385360	11386529	88.2545	75.4639	673.364	648.251	48.5322	65.4179	82.7781	62.9036
WBGene00000728	col-155	protein_coding	V	11388852	11389876	163.488	157.113	391.003	381.324	103.535	158.414	227.135	280.207
WBGene00000729	col-156	protein_coding	V	11449219	11450357	5.78718	3.71134	308.924	286.901	40.9827	11.5443	51.484	40.0296
WBGene00000730	col-157	protein_coding	V	11484042	11485039	8.68077	13.6082	510.004	512.064	21.5699	23.4094	75.7117	77.1998
WBGene00000731	col-158	protein_coding	V	11829582	11831219	60.7654	19.7938	87.6569	67.1857	9.70644	32.3883	14.1329	14.2963
WBGene00000732	col-159	protein_coding	V	13198231	13202177	121.531	190.515	904.194	913.362	203.835	239.224	2734.71	2556.17
WBGene00000733	col-160	protein_coding	V	13200982	13202189	4113.24	4110.92	3211.69	3128.67	2453.57	3797.13	6355.75	6564.85
WBGene00000734	col-161	protein_coding	V	13317029	13318011	14.468	17.3196	587.832	579.249	60.3956	18.9199	376.54	391.718
WBGene00000735	col-162	protein_coding	V	13441961	13443419	5.78718	6.18556	289.799	332.297	34.5118	16.0338	219.059	211.585
WBGene00000736	col-163	protein_coding	V	20600095	20602540	1.4468	7.42267	4.25003	3.63166	0	1.60338	1.00949	5.71851
WBGene00000737	col-164	protein_coding	X	2093469	2094846	1.4468	0	3.45315	1.81583	1.07849	1.2827	0	0
WBGene00000738	col-165	protein_coding	X	4353618	4354852	745.1	2605.36	173.72	261.479	2369.45	3561.43	13.1234	14.2963
WBGene00000739	col-166	protein_coding	X	6280016	6280921	3718.26	3841.23	9093.74	9442.31	2371.61	2984.53	351.302	394.577
WBGene00000740	col-167	protein_coding	X	6323488	6324393	640.93	843.711	1812.11	1888.46	532.776	642.635	137.291	137.244
WBGene00000741	col-168	protein_coding	X	6326388	6327293	107.063	132.371	337.346	297.796	102.457	91.072	29.2752	42.8888
WBGene00000742	col-169	protein_coding	X	6329160	6330062	75.2334	136.082	761.818	713.621	89.5149	99.0889	17.1613	11.437
WBGene00000743	col-170	protein_coding	X	6331709	6332611	44.8507	51.9587	342.127	348.639	39.9042	50.3462	18.1708	37.1703
WBGene00000745	col-172	protein_coding	X	6672819	6674423	31.8295	59.3814	96.6882	112.581	52.8462	73.1142	0	2.85925
WBGene00000746	col-173	protein_coding	X	6875169	6877536	11.5744	9.8969	240.658	256.032	5.39247	11.865	11.1044	5.71851
WBGene00000747	col-174	protein_coding	X	7546809	7548365	13.0212	25.9794	62.4223	56.2907	51.7677	46.498	4.03796	0
WBGene00000748	col-175	protein_coding	X	9233638	9234618	5.78718	11.134	20.4533	9.07914	19.4129	21.806	94.892	122.948
WBGene00000749	col-176	protein_coding	X	10077597	10078728	30.3827	11.134	151.673	116.213	24.8053	22.1267	13.1234	11.437
WBGene00000750	col-177	protein_coding	X	10999663	11001850	36.1699	48.2474	27.6252	21.7899	47.4537	41.6879	0	0
WBGene00000751	col-178	protein_coding	X	11199455	11200467	3175.72	2863.92	1087.48	1076.79	2589.46	3724.65	6431.46	6547.69
WBGene00000752	col-179	protein_coding	X	11201465	11202485	318.295	347.629	188.595	179.767	318.155	568.238	1327.48	1375.3
WBGene00000753	col-180	protein_coding	X	11711378	11712280	43.4039	102.68	1269.17	1281.98	108.928	106.785	200.888	228.74
WBGene00000754	col-181	protein_coding	X	12104930	12106102	5246.08	4682.47	2678.32	2703.77	3549.32	5728.56	11001.4	10885.2
WBGene00000755	col-182	pseudogene	X	12636153	12637056	26.0423	30.9278	71.9849	61.7382	30.1978	36.2364	3.02847	0
WBGene00000756	col-183	protein_coding	X	13466643	13467764	4.34039	0	34.0002	34.5008	0	1.2827	0	0
WBGene00000757	col-184	protein_coding	X	13469455	13470409	2257	2268.86	1342.74	1314.66	2393.18	2664.5	5452.25	5658.46
WBGene00000758	col-185	protein_coding	X	13510035	13511097	1.4468	0	21.2501	32.6849	0	2.56541	0	0
WBGene00000759	col-186	protein_coding	X	15951494	15954789	26.0423	30.9278	59.5004	43.5799	26.9623	31.4263	9.0854	8.57776
WBGene00000760	col-187	protein_coding	X	16072895	16074923	1.4468	4.94845	6.64067	12.7108	9.70644	5.45149	1.00949	2.85925
WBGene00000761	coq-1	protein_coding	I	5412841	5415629	513.612	446.598	603.77	499.353	390.414	475.242	601.656	634.754
WBGene00000762	coq-2	protein_coding	III	6935967	6939457	271.998	237.526	225.517	172.504	262.074	235.056	277.61	234.459
WBGene00000763	coq-3	protein_coding	IV	14793104	14796324	227.147	264.742	254.471	250.584	238.347	218.701	278.619	268.77
WBGene00000764	coq-4	protein_coding	I	3869214	3870114	128.765	100.206	88.985	112.581	128.341	107.747	151.423	128.666
WBGene00000765	coq-5	protein_coding	III	7857315	7858457	415.23	342.68	462.988	432.167	366.688	318.111	551.181	551.836
WBGene00000766	coq-6	protein_coding	V	9336762	9338858	366.039	397.113	401.628	377.692	307.371	310.094	439.128	443.184
WBGene00000767	coq-8	protein_coding	III	4863427	4866948	815.993	685.36	1152.02	1200.26	502.578	661.555	1147.79	1212.32
WBGene00000768	cor-1	protein_coding	III	10249111	10254709	258.976	409.484	361.784	315.954	281.487	363.647	88.8351	88.6369
WBGene00000770	cpb-1	protein_coding	III	9322310	9324913	494.804	426.804	613.067	610.119	346.196	493.521	1038.76	1055.06
WBGene00000771	cpb-2	protein_coding	II	6192784	6195170	4.34039	0	7.96881	7.26332	9.70644	15.7131	23.2183	22.874
WBGene00000772	cpb-3	protein_coding	I	5788634	5791752	1590.03	1291.55	1557.1	1523.48	1106.53	1209.27	3054.72	2956.47
WBGene00000773	cpf-1	protein_coding	II	8600449	8602440	558.463	484.948	561.27	591.96	628.761	453.757	882.294	934.976
WBGene00000774	cpf-2	protein_coding	III	13266932	13268883	435.485	457.732	545.863	493.905	456.203	415.917	800.525	709.095
WBGene00000775	cpin-1	protein_coding	IV	9450675	9453409	73.7866	72.9896	57.9067	52.659	88.4364	62.2112	43.408	40.0296
WBGene00000776	cpl-1	protein_coding	V	16592572	16595346	8245.29	7691.13	7642.35	7944.25	9022.67	8793.58	12189.6	13258.4
WBGene00000777	cpn-1	protein_coding	I	8636123	8637943	1448.24	1269.28	1371.17	1347.35	1278.01	1220.49	2431.86	2510.42
WBGene00000778	cpn-2	protein_coding	II	337782	339250	33.2763	175.67	99.6101	81.7123	94.9074	105.823	29.2752	17.1555
WBGene00000779	cpn-3	protein_coding	I	3987940	3988699	2325	2147.63	1731.09	1726.85	1633.92	2140.51	1838.28	1829.92
WBGene00000780	cpn-4	protein_coding	I	10924240	10925750	214.126	195.464	248.892	205.189	130.498	216.456	131.234	131.526
WBGene00000781	cpr-1	protein_coding	V	11975551	11976756	9486.64	13905.1	3438.01	3337.49	11258.4	12900.5	1949.32	1895.69
WBGene00000782	cpr-2	protein_coding	V	16532936	16534100	85.3609	55.6701	30.0158	34.5008	40.9827	28.2195	0	0
WBGene00000783	cpr-3	protein_coding	V	15296834	15298700	167.828	223.917	204.001	201.557	213.542	175.41	101.958	94.3554
WBGene00000784	cpr-4	protein_coding	V	6614674	6615851	5183.87	6094.02	1631.21	1695.98	9187.68	6406.15	658.187	677.643
WBGene00000785	cpr-5	protein_coding	V	1132598	1134036	2806.78	4023.09	4389.48	4407.02	3041.35	2829.33	2114.88	2181.61
WBGene00000786	cpr-6	protein_coding	X	6607207	6609045	6196.63	5495.25	7474.47	7472.14	6371.74	6411.6	9351.91	9884.44
WBGene00000787	cps-6	protein_coding	I	4446586	4448461	439.826	347.629	435.628	426.72	335.411	359.799	451.242	448.903
WBGene00000788	cpz-1	protein_coding	I	2686640	2689429	2792.32	2461.85	3569.49	3733.34	1872.26	2494.22	3958.21	4094.45
WBGene00000789	cpz-2	protein_coding	V	13381189	13383077	1919.9	1592.16	1348.59	1385.48	1334.1	1684.83	441.147	491.792
WBGene00000792	crb-1	protein_coding	X	17402532	17414014	173.615	481.237	348.768	348.639	264.231	332.22	72.6832	85.7776
WBGene00000793	crh-1	protein_coding	III	11657767	11693981	1190.71	1172.78	1073.4	1116.73	939.367	1075.23	955.987	894.946
WBGene00000794	crn-1	protein_coding	I	3481997	3484500	830.461	660.618	812.021	853.44	674.058	584.272	1368.87	1455.36
WBGene00000795	crn-2	protein_coding	V	5594615	5595842	173.615	152.165	171.329	177.951	166.088	136.929	196.85	142.963
WBGene00000796	crn-3	protein_coding	II	10588042	10592652	1202.29	1002.06	1248.98	1212.97	799.163	946.957	1858.47	1807.05
WBGene00000797	crn-4	protein_coding	X	2255848	2258101	102.722	91.5463	122.188	127.108	125.105	73.4348	166.566	200.148
WBGene00000798	crn-5	protein_coding	II	10592752	10593591	198.211	200.412	197.095	188.846	246.975	157.452	259.439	237.318
WBGene00000799	crn-6	protein_coding	III	9367271	9370381	107.063	149.691	126.97	107.134	161.774	116.085	56.5314	54.3258
WBGene00000800	cars-1	protein_coding	I	2623099	2628112	1889.51	1776.49	2416.94	2389.63	1692.16	1690.93	2712.5	2593.34
WBGene00000801	cars-2	pseudogene	I	2629685	2632320	85.3609	84.1236	112.095	105.318	75.4945	64.7766	76.7212	88.6369
WBGene00000802	crt-1	protein_coding	V	6098992	6100542	11373.3	12394.6	17709.1	17958.5	10382.7	9931.66	9866.75	9958.78
WBGene00000803	csb-1	protein_coding	X	15861294	15865918	214.126	207.835	284.752	305.059	189.815	199.461	407.834	354.547
WBGene00000804	csc-1	protein_coding	II	13596955	13597947	429.698	451.546	563.66	613.75	689.157	434.516	910.559	1100.81
WBGene00000812	csk-1	protein_coding	I	71425	81156	818.886	994.638	873.115	893.388	701.02	825.42	1183.12	1206.61
WBGene00000813	csn-1	protein_coding	V	17861368	17870651	755.227	645.773	729.411	746.306	857.402	633.335	981.224	995.02
WBGene00000814	csn-2	protein_coding	I	6022660	6026877	982.374	759.587	660.083	677.304	1063.39	766.737	1059.96	1158
WBGene00000815	csn-3	protein_coding	IV	194742	202586	703.143	570.309	646.27	571.986	840.146	573.69	959.015	883.509
WBGene00000816	csn-4	protein_coding	IV	1077463	1087013	562.803	557.938	617.051	651.883	663.273	517.892	998.385	989.302
WBGene00000817	csn-5	protein_coding	IV	5649533	5651079	617.782	531.958	554.895	513.88	634.154	498.972	837.876	846.339
WBGene00000818	csn-6	protein_coding	IV	13300824	13303711	672.76	655.67	698.864	657.33	507.97	562.466	951.949	923.539
WBGene00000819	csp-1	protein_coding	II	13601204	13605057	23.1487	12.3711	18.3283	14.5266	19.4129	15.7131	23.2183	34.311
WBGene00000820	csp-2	protein_coding	IV	6307739	6315719	15.9148	22.268	17.797	18.1583	15.0989	15.3925	19.1803	11.437
WBGene00000821	csp-3	protein_coding	I	11888501	11890558	0	6.18556	2.39064	0	1.07849	0.962028	2.01898	0
WBGene00000822	csq-1	protein_coding	X	14684877	14688322	2265.68	1986.8	1771.47	1677.83	1583.23	1773.66	939.835	889.228
WBGene00000829	ctb-1	protein_coding	MtDNA	4504	5621	13488.5	11552.2	16157.6	15699.7	15636	12249.8	16291.1	14230.5
WBGene00000830	ctl-1	protein_coding	II	14303568	14306260	47.7443	47.0103	73.0474	63.554	70.102	72.7935	32.3037	14.2963
WBGene00000831	ctl-2	protein_coding	II	14299556	14302027	844.929	1125.77	767.662	764.464	1123.79	1227.55	438.118	488.932
WBGene00000832	ctn-1	protein_coding	I	2606741	2617360	591.739	862.267	710.817	662.778	643.86	694.264	159.499	174.414
WBGene00000833	cts-1	protein_coding	III	10214771	10216635	7621.72	7479.58	8792.78	8784.98	5332.07	8096.43	7655.97	7760.01
WBGene00000834	cua-1	protein_coding	III	13439730	13455307	1232.67	1203.71	1556.04	1599.75	990.057	1249.35	2105.79	1967.17
WBGene00000835	cuc-1	protein_coding	III	7860466	7860985	231.487	222.68	297.768	314.138	334.333	245.959	332.122	340.251
WBGene00000836	cul-1	protein_coding	III	10471237	10475129	1303.56	1134.43	1440.23	1372.77	1314.68	1072.34	1931.15	1867.09
WBGene00000837	cul-2	protein_coding	III	13687269	13692683	2129.68	2192.16	2298.73	2237.1	1966.09	2010.32	3368.67	3153.76
WBGene00000838	cul-3	protein_coding	V	177417	185172	1999.47	1954.64	2319.45	2353.31	1866.87	1857.68	3532.2	3382.5
WBGene00000839	cul-4	protein_coding	II	7302101	7305758	833.354	763.298	755.974	829.834	678.372	735.952	1225.52	1200.89
WBGene00000840	cul-5	protein_coding	V	10179535	10183154	826.12	728.659	818.662	813.491	710.727	724.728	1133.66	1126.55
WBGene00000841	cul-6	protein_coding	IV	12586485	12590451	47.7443	23.5051	43.5628	41.7641	45.2967	40.0845	24.2277	31.4518
WBGene00000843	cup-2	protein_coding	I	10398990	10400177	902.8	763.298	865.147	828.018	745.239	756.475	1144.76	1137.98
WBGene00000845	cup-4	protein_coding	III	7866489	7868737	75.2334	96.4948	62.9536	32.6849	80.887	83.0551	27.2562	28.5925
WBGene00000846	cup-5	protein_coding	III	7584181	7591581	732.079	601.237	666.192	691.831	584.543	623.715	1157.88	1117.97
WBGene00000851	cut-1	protein_coding	II	11269122	11271660	15.9148	1.23711	35.8596	36.3166	0	9.94096	1.00949	0
WBGene00000853	cut-6	protein_coding	III	10911460	10916665	39.0635	263.505	43.5628	38.1324	173.637	261.03	2.01898	5.71851
WBGene00000854	cux-7	protein_coding	III	7518628	7520845	499.144	445.36	504.425	477.563	385.022	407.9	712.7	686.221
WBGene00000857	cwn-1	protein_coding	II	130983	133598	124.424	257.319	145.564	143.45	193.05	183.106	38.3606	68.6221
WBGene00000858	cwn-2	protein_coding	IV	10067816	10070251	104.169	169.484	76.7662	74.449	153.146	153.604	10.0949	31.4518
WBGene00000859	cwp-1	protein_coding	V	4840617	4841279	0	1.23711	1.85939	0	1.07849	3.20676	1.00949	0
WBGene00000860	cwp-2	protein_coding	V	4841935	4842644	0	0	0.265627	3.63166	0	2.88609	0	0
WBGene00000862	cwp-4	protein_coding	V	5053635	5056474	56.425	45.7732	23.9064	18.1583	25.8838	26.9368	2.01898	2.85925
WBGene00000863	cya-1	protein_coding	III	9106699	9109272	666.973	648.247	630.333	766.28	677.294	616.66	1218.45	1289.52
WBGene00000864	cya-2	protein_coding	II	2022673	2023614	8.68077	4.94845	4.51566	5.44749	9.70644	5.45149	12.1139	11.437
WBGene00000865	cyb-1	protein_coding	IV	10735216	10737177	2361.17	2020.2	2703.28	2845.4	2084.73	2053.29	4790.03	4720.63
WBGene00000866	cyb-2.1	protein_coding	IV	10985985	10987426	881.098	675.463	723.036	682.752	809.948	694.264	1547.55	1549.72
WBGene00000867	cyb-2.2	protein_coding	I	4114861	4116370	1349.86	1175.26	1353.9	1370.95	1372.92	1145.78	2654.96	2584.77
WBGene00000868	cyb-3	protein_coding	V	15395696	15397353	3865.84	3722.47	5031.77	4948.13	3997.97	3430.59	8592.77	8540.59
WBGene00000869	cyc-1	protein_coding	I	8022674	8024422	3256.74	2992.58	3874.7	3816.87	3017.62	2884.48	3465.58	3405.37
WBGene00000870	cyd-1	protein_coding	II	12980591	12993117	188.083	263.505	278.643	281.453	183.344	197.857	104.987	88.6369
WBGene00000871	cye-1	protein_coding	I	6780799	6784397	1264.5	992.164	1192.13	1178.47	925.347	1029.05	2275.39	2221.64
WBGene00000872	cyk-1	protein_coding	III	7023642	7029205	979.481	1080	881.084	902.467	784.064	1039.31	1401.17	1218.04
WBGene00000874	cyk-3	protein_coding	III	6020159	6024985	1128.5	1021.85	1191.6	1193	944.76	902.383	1421.36	1415.33
WBGene00000875	cyk-4	protein_coding	III	13768648	13771224	1688.41	1478.35	2019.83	2155.39	1306.06	1413.22	3406.02	3534.04
WBGene00000876	cyl-1	protein_coding	V	11991011	11993723	836.248	801.649	761.818	749.937	588.857	675.665	1027.66	1083.66
WBGene00000877	cyn-1	protein_coding	V	14356076	14356822	840.588	728.659	924.116	991.443	924.269	653.859	1088.23	1086.52
WBGene00000878	cyn-2	protein_coding	III	13692668	13693811	21.7019	24.7422	23.1095	16.3425	43.1397	47.1394	68.6453	77.1998
WBGene00000879	cyn-3	protein_coding	V	15189927	15190926	1475.73	1465.98	2000.7	1970.17	1629.6	1351.01	1955.38	2141.58
WBGene00000880	cyn-4	protein_coding	II	10870779	10872611	606.207	477.525	596.067	591.96	536.011	519.495	901.474	986.442
WBGene00000881	cyn-5	protein_coding	I	15040474	15041274	2599.89	3033.4	3842.29	3882.24	2866.63	2754.61	2712.5	2856.39
WBGene00000882	cyn-6	protein_coding	III	773414	774159	125.871	233.814	434.566	484.826	234.033	197.216	104.987	80.0591
WBGene00000883	cyn-7	protein_coding	V	15186582	15187378	7858.99	7566.18	10379.4	10203.1	7493.37	6443.67	12883.1	13229.8
WBGene00000884	cyn-8	protein_coding	X	8911293	8914261	260.423	264.742	343.456	319.586	279.33	206.515	280.638	297.362
WBGene00000885	cyn-9	protein_coding	III	3697821	3699640	295.146	236.288	188.861	167.056	246.975	211.646	454.27	494.651
WBGene00000886	cyn-10	protein_coding	II	6912540	6913365	285.019	227.629	204.798	217.899	296.586	217.418	397.739	320.236
WBGene00000887	cyn-11	protein_coding	II	8715131	8716281	309.614	238.763	271.205	243.321	362.374	244.355	445.185	431.747
WBGene00000888	cyn-12	protein_coding	IV	7132132	7133217	277.785	280.825	219.939	199.741	337.568	247.883	362.407	406.014
WBGene00000889	cyn-13	protein_coding	IV	17111081	17116657	506.378	560.412	598.989	633.724	689.157	447.664	765.193	866.354
WBGene00000890	sig-7	protein_coding	I	8646451	8651671	449.953	384.742	367.096	314.138	464.831	375.512	666.263	631.895
WBGene00000891	cyn-15	protein_coding	I	13566251	13572047	597.527	560.412	643.614	744.49	572.68	508.592	899.455	883.509
WBGene00000892	cyn-16	protein_coding	II	12028128	12036742	418.124	435.464	371.346	397.667	331.097	365.25	562.286	657.628
WBGene00000893	cyn-17	protein_coding	V	5799673	5805666	37.6167	215.258	304.94	246.953	127.262	241.469	2.01898	2.85925
WBGene00000894	dab-1	protein_coding	II	8222386	8229153	2714.19	2649.89	3006.1	2921.67	2460.04	2732.8	4625.48	4514.76
WBGene00000895	dac-1	protein_coding	III	816145	821730	40.5103	34.6391	54.1879	45.3957	28.0408	37.1984	24.2277	14.2963
WBGene00000896	dad-1	protein_coding	I	6553481	6554290	623.569	600	592.348	546.565	691.314	611.529	821.724	749.124
WBGene00000897	daf-1	protein_coding	IV	132416	138081	491.91	555.463	577.207	553.828	448.653	498.651	462.346	408.873
WBGene00000898	daf-2	protein_coding	III	2994514	3040846	4560.3	4623.09	3644.93	3617.13	2744.76	4488.5	4126.79	4331.77
WBGene00000899	daf-3	protein_coding	X	817922	825475	571.484	713.814	377.19	437.615	444.339	558.939	251.363	151.54
WBGene00000900	daf-4	protein_coding	III	5625135	5632323	827.567	1049.07	760.755	760.832	610.427	748.779	488.593	500.369
WBGene00000901	daf-5	protein_coding	II	14033216	14052304	1022.88	1082.47	922.522	985.995	559.738	762.568	379.568	397.436
WBGene00000902	daf-6	protein_coding	X	14888488	14894326	30.3827	113.814	150.345	145.266	78.73	134.043	13.1234	5.71851
WBGene00000903	daf-7	protein_coding	III	811844	813773	146.126	134.845	150.345	138.003	64.7096	78.5657	22.2088	31.4518
WBGene00000904	daf-8	protein_coding	I	8584424	8587507	269.104	274.639	170.798	174.32	175.794	231.208	112.053	105.792
WBGene00000905	daf-9	protein_coding	X	6196927	6200823	11.5744	17.3196	79.4224	108.95	5.39247	11.5443	16.1518	5.71851
WBGene00000906	daf-10	protein_coding	IV	9136933	9146211	46.2975	74.2267	33.2034	27.2374	51.7677	84.3378	6.05694	11.437
WBGene00000907	daf-11	protein_coding	V	11718102	11726071	107.063	113.814	48.0785	43.5799	88.4364	101.013	1.00949	5.71851
WBGene00000908	daf-12	protein_coding	X	10635908	10666875	587.399	593.814	1225.87	1300.13	283.644	560.542	210.983	177.274
WBGene00000910	daf-14	protein_coding	IV	10250627	10255852	241.615	225.154	155.657	148.898	252.367	205.553	58.5504	60.0443
WBGene00000911	daf-15	protein_coding	IV	9386208	9394979	2733	2544.74	2683.63	2689.24	1754.71	2443.87	3881.49	3868.57
WBGene00000912	daf-16	protein_coding	I	10750498	10776703	2734.44	2708.04	2100.84	2215.31	1979.03	2516.67	2152.23	2233.08
WBGene00000913	daf-18	protein_coding	IV	420011	425177	4291.2	3889.48	4836	4933.61	3620.5	3559.83	9449.83	8929.45
WBGene00000914	daf-19	protein_coding	II	10157520	10169346	554.123	741.03	534.972	477.563	455.124	648.407	306.885	325.955
WBGene00000915	hsp-90	protein_coding	V	14684918	14688545	25700.9	22432.6	33376.8	33004.5	20321	21653.3	34123.8	36266.8
WBGene00000917	daf-25	protein_coding	I	332604	337845	348.678	367.422	343.19	345.008	296.586	283.478	452.251	440.325
WBGene00000920	daf-28	protein_coding	V	19815133	19816454	44.8507	42.0618	109.97	110.766	22.6484	31.4263	7.06643	8.57776
WBGene00000923	daf-31	protein_coding	IV	8290273	8291496	593.186	587.628	612.004	633.724	601.799	528.154	907.531	986.442
WBGene00000928	dao-2	protein_coding	II	4562950	4563461	221.36	672.989	1351.24	1283.79	309.528	360.44	8.07592	17.1555
WBGene00000929	dao-3	protein_coding	X	8084210	8086550	235.828	279.587	404.55	392.219	220.013	296.625	258.429	205.866
WBGene00000930	dao-4	protein_coding	X	10075288	10076357	0	3.71134	5.84379	9.07914	3.23548	3.20676	2.01898	2.85925
WBGene00000931	dao-5	protein_coding	I	10187546	10190896	3330.52	3143.5	4253.48	4318.04	1838.83	2624.41	4698.16	4709.19
WBGene00000932	dao-6	protein_coding	III	9735263	9736201	14.468	7.42267	26.0314	21.7899	11.8634	9.94096	3.02847	2.85925
WBGene00000933	dap-3	protein_coding	II	10581133	10582512	538.208	476.288	719.052	677.304	456.203	442.854	658.187	617.599
WBGene00000934	dat-1	protein_coding	III	9242975	9246802	70.893	96.4948	54.4535	52.659	58.2386	82.7344	3.02847	2.85925
WBGene00000935	daz-1	protein_coding	II	5456305	5458609	2228.07	2006.6	2364.08	2393.26	1500.18	1928.87	4742.58	4489.03
WBGene00000936	dbl-1	protein_coding	V	6758135	6760418	157.701	149.691	189.392	210.636	112.163	141.098	54.5124	42.8888
WBGene00000937	dbr-1	protein_coding	I	6490716	6492727	418.124	340.206	414.644	414.009	351.589	348.896	628.912	571.851
WBGene00000938	dcp-66	protein_coding	I	7536104	7542159	1237.01	1343.5	1097.84	1114.92	1103.3	1219.21	1339.59	1240.92
WBGene00000939	dcr-1	protein_coding	III	8071967	8080281	1977.77	1651.55	2132.72	2066.41	1471.06	1569.39	2888.15	2879.27
WBGene00000940	dcs-1	protein_coding	V	20087848	20090743	383.401	330.309	389.409	401.298	337.568	313.942	607.713	574.71
WBGene00000941	ddp-1	protein_coding	III	1859888	1860381	309.614	320.412	367.096	383.14	473.458	308.17	486.574	497.51
WBGene00000942	deb-1	protein_coding	IV	7085215	7094266	4039.45	4698.55	3418.35	3391.97	2587.3	3754.16	718.756	703.376
WBGene00000950	deg-1	protein_coding	X	7753070	7774817	44.8507	89.0721	65.3442	69.0015	55.0031	92.3547	19.1803	14.2963
WBGene00000951	deg-3	protein_coding	V	11412870	11415159	69.4462	50.7216	68.2661	52.659	35.5903	50.6668	8.07592	17.1555
WBGene00000952	del-1	protein_coding	X	14268081	14277082	18.8083	30.9278	30.5471	23.6058	15.0989	33.0296	4.03796	2.85925
WBGene00000953	del-2	protein_coding	IV	9636905	9642025	39.0635	54.4329	28.4221	41.7641	31.2763	62.8525	2.01898	2.85925
WBGene00000955	des-2	protein_coding	V	11415272	11421705	91.1481	68.0412	86.86	78.0806	59.3171	80.169	10.0949	22.874
WBGene00000958	dgk-1	protein_coding	X	983903	991456	554.123	712.577	457.941	404.93	432.476	519.175	28.2657	31.4518
WBGene00000959	dgk-2	protein_coding	X	4494876	4504388	452.847	606.185	505.222	512.064	605.035	540.339	157.48	142.963
WBGene00000960	dgk-3	protein_coding	III	9163068	9168196	36.1699	56.9072	24.172	27.2374	38.8258	59.6458	2.01898	0
WBGene00000961	dgn-1	protein_coding	X	10920515	10928998	554.123	893.195	683.192	682.752	537.09	750.703	332.122	291.644
WBGene00000962	dhc-1	protein_coding	I	4386785	4401907	11397.9	10353.4	15000.2	14846.2	6533.51	9998.36	18125.4	18479.4
WBGene00000963	dhp-1	protein_coding	I	7238993	7243967	447.06	329.072	261.377	306.875	342.961	326.769	110.034	88.6369
WBGene00000964	dhp-2	protein_coding	IV	9978122	9980775	266.21	268.453	205.595	217.899	235.111	190.482	38.3606	45.7481
WBGene00000965	dhs-1	protein_coding	I	5278803	5281519	405.103	424.33	391.8	346.823	543.561	359.799	632.95	634.754
WBGene00000966	dhs-2	protein_coding	I	5354181	5357029	118.637	111.34	104.391	96.2389	113.242	118.33	77.7307	57.1851
WBGene00000967	dhs-3	protein_coding	I	8212362	8218324	455.741	400.824	597.395	561.091	423.848	504.744	563.295	546.117
WBGene00000968	dhs-4	protein_coding	I	9647603	9649238	53.5314	32.1649	39.0471	47.2116	38.8258	46.498	13.1234	8.57776
WBGene00000969	dhs-5	protein_coding	II	5453847	5455977	127.318	176.907	215.158	216.084	154.225	137.57	35.3321	34.311
WBGene00000970	dhs-6	protein_coding	II	5617128	5619319	782.716	873.401	692.489	657.33	919.955	651.935	840.905	826.324
WBGene00000971	dhs-7	protein_coding	II	7206990	7208460	20.2551	29.6907	20.1876	23.6058	43.1397	28.8609	27.2562	31.4518
WBGene00000972	dhs-8	protein_coding	II	14498026	14499755	10.1276	14.8453	28.4221	27.2374	23.7268	17.6372	11.1044	8.57776
WBGene00000973	dhs-9	protein_coding	III	5364512	5368045	250.296	244.948	328.846	312.323	211.385	220.305	177.67	194.429
WBGene00000974	dhs-11	protein_coding	III	10640836	10642865	153.36	143.505	142.376	152.53	227.562	146.549	263.477	311.659
WBGene00000975	dhs-12	protein_coding	IV	10142455	10146225	473.102	409.484	421.284	408.562	488.557	448.947	546.134	566.132
WBGene00000976	dhs-13	protein_coding	V	1765311	1771734	768.248	783.092	1072.34	1040.47	748.474	747.175	1184.13	1246.63
WBGene00000977	dhs-14	protein_coding	V	2763981	2765200	153.36	139.794	154.064	132.556	143.44	131.798	157.48	148.681
WBGene00000978	dhs-15	protein_coding	V	2768361	2769854	46.2975	27.2165	23.1095	19.9741	20.4914	22.768	1.00949	8.57776
WBGene00000979	dhs-16	protein_coding	V	5983745	5985509	13.0212	40.8247	36.3909	54.4749	24.8053	27.5781	5.04745	2.85925
WBGene00000980	dhs-17	protein_coding	V	6026329	6034814	221.36	169.484	126.97	108.95	160.695	150.397	172.623	125.807
WBGene00000981	dhs-18	protein_coding	V	11045705	11046833	412.337	419.381	248.892	250.584	750.631	386.415	127.196	137.244
WBGene00000982	dhs-19	protein_coding	V	11489048	11490482	231.487	228.866	183.017	185.215	237.268	177.334	173.632	180.133
WBGene00000983	dhs-20	protein_coding	V	11602294	11604563	125.871	170.722	85.0006	76.2648	246.975	142.06	40.3796	28.5925
WBGene00000984	dhs-21	protein_coding	V	12731767	12733645	180.849	210.309	107.313	92.6073	311.684	220.946	100.949	120.089
WBGene00000985	dhs-22	protein_coding	V	14420071	14421440	966.459	905.566	936.6	949.679	1055.84	847.226	1386.03	1403.89
WBGene00000986	dhs-23	protein_coding	V	15381219	15382271	11.5744	21.0309	7.17193	9.07914	10.7849	10.2616	3.02847	11.437
WBGene00000987	dhs-24	protein_coding	V	19934767	19946629	493.357	483.711	661.411	619.198	548.953	433.554	711.69	703.376
WBGene00000988	dhs-25	protein_coding	X	1486532	1489326	613.441	617.319	1338.49	1374.58	255.603	599.985	2282.46	2519
WBGene00000989	dhs-26	protein_coding	X	3360722	3362493	11.5744	4.94845	12.4845	16.3425	5.39247	3.84811	11.1044	17.1555
WBGene00000990	dhs-27	protein_coding	X	3412876	3414710	76.6802	128.66	151.939	154.345	98.1429	86.9032	45.427	40.0296
WBGene00000991	dhs-28	protein_coding	X	6818438	6820080	1401.94	1504.33	1816.09	1804.93	1735.3	1457.47	948.92	992.161
WBGene00000992	dhs-29	protein_coding	X	7661891	7664919	81.0205	137.319	157.517	157.977	85.201	106.785	32.3037	37.1703
WBGene00000993	dhs-30	protein_coding	X	17230725	17235838	269.104	231.34	213.83	246.953	292.272	260.71	208.964	268.77
WBGene00000994	ints-6	protein_coding	IV	8691745	8696564	510.719	431.752	483.175	433.983	437.868	435.799	810.62	826.324
WBGene00000995	die-1	protein_coding	II	10061302	10067917	559.91	801.649	739.771	755.385	730.14	732.745	598.627	589.006
WBGene00000996	dif-1	protein_coding	IV	7551560	7553008	682.887	659.381	797.412	788.07	758.181	589.403	922.673	960.709
WBGene00000998	dig-1	protein_coding	III	6746308	6794764	15227.5	18014.8	16482.7	16424.2	10099	17371.3	2657.99	2604.78
WBGene00001000	dim-1	protein_coding	X	8050466	8058220	2456.66	3263.5	3496.18	3275.76	2176.4	2861.71	1257.82	1260.93
WBGene00001001	dis-3	protein_coding	IV	10097202	10106523	1177.69	1055.26	1247.65	1243.84	922.112	891.48	1729.26	1481.09
WBGene00001002	div-1	protein_coding	III	10245056	10248559	565.697	528.247	638.567	690.015	593.171	488.71	1048.86	926.398
WBGene00001005	dlc-1	protein_coding	III	6462963	6463779	1847.56	1774.02	1877.98	1926.59	2464.36	1877.88	2470.22	2336.01
WBGene00001006	dlg-1	protein_coding	X	5479700	5484941	1843.22	3188.04	1758.45	1852.15	1996.29	2489.09	489.602	514.666
WBGene00001007	dli-1	protein_coding	IV	13096982	13098792	733.525	623.505	997.694	1053.18	615.82	649.369	1159.9	1272.37
WBGene00001008	dlk-1	protein_coding	I	12565800	12572801	1038.8	1092.37	1046.04	1087.68	797.006	903.024	382.596	391.718
WBGene00001016	dna-2	protein_coding	II	11778430	11782396	1046.03	908.041	1101.55	1051.36	731.218	844.982	2012.92	1821.34
WBGene00001017	dnc-1	protein_coding	IV	10926720	10933203	1688.41	1647.83	2015.05	1946.57	1348.12	1553.68	2441.95	2513.28
WBGene00001018	dnc-2	protein_coding	III	5924394	5925756	562.803	466.391	522.754	579.249	671.901	428.744	760.146	757.702
WBGene00001019	dnj-1	protein_coding	IV	11299036	11304788	622.122	642.061	602.442	586.513	567.287	618.905	761.155	766.28
WBGene00001020	dnj-2	protein_coding	IV	11312476	11313980	354.465	247.422	397.643	421.272	337.568	280.271	471.432	488.932
WBGene00001021	dnj-3	protein_coding	V	15068678	15069507	76.6802	63.0927	58.9692	50.8432	99.2214	69.5867	104.987	91.4961
WBGene00001022	dnj-4	protein_coding	I	5282083	5283944	154.807	116.289	131.751	161.609	171.48	144.304	245.306	191.57
WBGene00001023	dnj-5	protein_coding	II	6853461	6858301	3337.76	3018.55	3642.01	3553.58	2384.55	2863.64	5763.18	5638.45
WBGene00001025	dnj-7	protein_coding	X	7194564	7198291	432.592	481.237	670.442	684.568	446.496	466.904	392.691	420.31
WBGene00001026	dnj-8	protein_coding	II	6594382	6598080	956.332	1007.01	901.803	871.598	849.853	926.433	1283.06	1298.1
WBGene00001027	dnj-9	protein_coding	II	4852056	4857820	695.909	647.01	840.975	838.913	663.273	575.293	1009.49	1066.5
WBGene00001028	dnj-10	protein_coding	III	8631165	8633565	496.251	423.092	558.879	568.354	438.947	433.875	675.348	674.784
WBGene00001029	dnj-11	protein_coding	IV	6585871	6588186	1707.22	1517.94	1768.54	1815.83	1188.5	1331.77	2716.54	2736.31
WBGene00001030	dnj-12	protein_coding	I	14756904	14758790	2526.11	2331.96	2582.69	2585.74	2078.26	2202.72	2814.46	2859.25
WBGene00001031	dnj-13	protein_coding	II	11545701	11547360	2271.47	2095.67	2379.22	2387.82	2114.92	2283.86	2255.2	2267.39
WBGene00001032	dnj-14	protein_coding	X	4709741	4711748	260.423	269.691	277.049	266.927	225.405	243.073	194.831	263.051
WBGene00001033	dnj-15	protein_coding	IV	4176388	4178364	199.658	204.124	177.704	147.082	239.425	168.676	285.686	334.533
WBGene00001034	dnj-16	protein_coding	III	4191141	4193429	600.42	560.412	510.535	562.907	719.355	504.424	759.136	760.561
WBGene00001035	dnj-17	protein_coding	III	13390850	13393339	438.379	408.247	470.16	408.562	314.92	358.195	654.149	703.376
WBGene00001036	dnj-18	protein_coding	III	4698119	4699380	218.466	200.412	206.923	170.688	203.835	190.482	327.075	308.799
WBGene00001037	dnj-19	protein_coding	V	5503033	5504857	2267.13	2200.82	2645.91	2765.51	2049.14	2223.25	3040.58	3087.99
WBGene00001038	dnj-20	protein_coding	II	9617469	9624176	2455.21	2635.05	2482.02	2500.4	2312.29	3003.77	2163.34	2173.03
WBGene00001039	dnj-21	protein_coding	I	5676827	5677646	141.786	97.7319	130.157	123.476	174.716	108.389	147.385	151.54
WBGene00001040	dnj-22	protein_coding	V	8461113	8462120	452.847	345.154	321.408	317.77	400.121	339.596	608.722	603.303
WBGene00001041	dnj-23	protein_coding	II	9107382	9108600	506.378	394.639	440.409	408.562	534.933	417.2	685.443	792.013
WBGene00001042	dnj-24	protein_coding	III	5415583	5424083	222.807	289.484	336.018	321.402	224.327	315.225	138.3	111.511
WBGene00001043	dnj-25	protein_coding	V	20729948	20744346	810.205	816.494	922.256	924.257	615.82	785.015	1152.84	1178.01
WBGene00001044	dnj-26	protein_coding	IV	12251093	12252679	199.658	154.639	138.657	110.766	257.76	173.486	332.122	348.829
WBGene00001045	dnj-27	protein_coding	I	11877803	11887278	240.168	430.515	531.519	570.17	332.176	291.174	223.097	254.474
WBGene00001046	dnj-28	protein_coding	I	2996488	3001382	256.083	211.546	249.955	277.822	230.798	206.515	435.09	446.044
WBGene00001047	dnj-29	protein_coding	I	14104515	14113108	1510.45	1576.08	2441.64	2306.1	1431.16	1462.6	2164.35	2047.23
WBGene00001048	dnj-30	protein_coding	I	2718027	2721475	364.592	252.371	262.174	263.295	278.251	250.448	420.957	434.607
WBGene00001049	dog-1	protein_coding	I	15017283	15022990	603.314	591.34	732.333	691.831	556.502	500.255	1044.82	1069.36
WBGene00001050	dom-3	protein_coding	I	5003450	5004933	248.849	223.917	232.158	203.373	196.286	202.988	371.492	383.14
WBGene00001051	cks-1	protein_coding	IV	8513919	8514725	947.651	814.02	754.646	789.886	971.722	771.547	1357.76	1458.22
WBGene00001052	dop-1	protein_coding	X	4411301	4418851	114.297	84.1236	93.7663	90.7914	55.0031	69.9074	11.1044	14.2963
WBGene00001053	dop-2	protein_coding	V	9608556	9614940	134.552	120	95.36	101.686	86.2794	91.072	15.1423	17.1555
WBGene00001054	dpf-1	protein_coding	V	15471329	15476124	120.084	184.33	168.142	172.504	127.262	179.258	23.2183	20.0148
WBGene00001055	dpf-2	protein_coding	X	14831831	14838191	497.698	423.092	346.112	305.059	557.581	505.386	317.989	277.348
WBGene00001056	dpf-3	protein_coding	I	6838354	6843343	2338.02	2147.63	2483.35	2407.79	1858.24	1943.94	3668.48	3562.63
WBGene00001057	dpf-4	protein_coding	III	5859308	5861908	813.099	752.164	850.272	842.545	702.099	625.318	1165.96	1123.69
WBGene00001058	dpf-5	protein_coding	IV	4802702	4806586	1925.68	1707.22	2155.56	2037.36	1888.44	1584.14	3038.56	3099.43
WBGene00001059	dpf-6	protein_coding	III	8038241	8041329	199.658	194.227	416.769	444.878	154.225	183.106	61.5789	42.8888
WBGene00001060	dpf-7	protein_coding	IV	4799384	4802594	578.718	514.639	602.707	593.776	534.933	466.584	892.389	894.946
WBGene00001061	dpl-1	protein_coding	II	9169910	9172565	829.014	809.072	963.429	1022.31	722.59	700.357	1600.04	1646.93
WBGene00001063	dpy-1	protein_coding	III	2034988	2048007	120.084	504.742	732.864	717.252	256.681	527.192	15.1423	14.2963
WBGene00001064	dpy-2	protein_coding	II	6714292	6715971	179.403	473.814	1160.79	1202.08	335.411	309.132	1.00949	5.71851
WBGene00001065	dpy-3	protein_coding	X	2144605	2145647	112.85	478.763	957.054	1074.97	198.443	264.237	5.04745	2.85925
WBGene00001066	dpy-4	protein_coding	IV	14985543	14986784	244.508	134.845	9142.35	9070.07	102.457	137.57	282.657	325.955
WBGene00001067	dpy-5	protein_coding	I	5432197	5433051	224.253	101.443	6350.87	6375.38	91.6719	102.616	188.775	274.488
WBGene00001068	dpy-6	protein_coding	X	8450381	8455640	337.103	184.33	1129.45	1035.02	101.378	186.634	40.3796	11.437
WBGene00001069	dpy-7	protein_coding	X	7536467	7537792	172.169	457.732	1150.16	1114.92	378.551	341.841	0	0
WBGene00001070	dpy-8	protein_coding	X	5148804	5150476	135.999	70.5154	1399.85	1434.5	19.4129	53.5529	5.04745	5.71851
WBGene00001071	dpy-9	protein_coding	IV	257403	259204	73.7866	43.2989	868.865	831.65	15.0989	39.4432	9.0854	2.85925
WBGene00001072	dpy-10	protein_coding	II	6710149	6712227	157.701	496.082	717.458	726.332	276.094	266.482	22.2088	25.7333
WBGene00001073	dpy-11	protein_coding	V	6511583	6515240	943.311	935.257	1820.08	1888.46	844.46	944.391	1069.05	1115.11
WBGene00001074	dpy-13	protein_coding	IV	4235614	4236710	289.359	160.825	8302.96	8396.39	76.573	139.494	248.334	446.044
WBGene00001075	dpy-14	protein_coding	I	6843589	6845142	995.395	4392.99	249.424	226.979	2456.81	3614.98	30.2847	14.2963
WBGene00001076	dpy-17	protein_coding	III	5107330	5108492	1154.54	5430.92	476.535	455.773	3588.15	4390.38	70.6643	57.1851
WBGene00001077	dpy-18	protein_coding	III	11372886	11377980	305.274	527.01	1064.37	1049.55	421.691	425.858	293.761	245.896
WBGene00001078	dpy-19	protein_coding	III	8659872	8667482	131.658	133.608	127.235	105.318	122.948	122.498	86.8161	111.511
WBGene00001079	dpy-20	protein_coding	IV	11696430	11700852	18.8083	16.0825	153.532	132.556	6.47096	9.94096	0	0
WBGene00001080	dpy-21	protein_coding	V	17936282	17949193	2476.91	3142.27	2987.77	3041.51	1775.2	2587.22	2391.48	2470.4
WBGene00001081	dpy-22	protein_coding	X	9810202	9822273	2154.28	2821.85	2548.42	2567.58	1402.04	2246.66	1675.75	1575.45
WBGene00001082	dpy-23	protein_coding	X	4389359	4393803	470.209	607.422	671.505	630.093	556.502	540.981	430.043	377.421
WBGene00001085	dpy-26	protein_coding	IV	12445801	12451335	1500.33	1506.8	1698.68	1714.14	1224.09	1337.86	2337.98	2387.48
WBGene00001086	dpy-27	protein_coding	III	3813018	3819679	1054.71	1548.86	1286.96	1220.24	903.777	1094.15	737.937	814.887
WBGene00001087	dpy-28	protein_coding	III	10763131	10777076	1902.54	1676.29	1809.72	1772.25	1481.85	1471.58	2694.33	2673.4
WBGene00001088	dpy-30	protein_coding	V	12191519	12192385	684.334	739.793	731.536	739.042	701.02	676.947	1077.13	1092.23
WBGene00001089	dre-1	protein_coding	V	6533614	6546500	927.396	1204.95	1558.96	1494.43	823.969	1073.62	300.828	351.688
WBGene00001090	drh-1	protein_coding	IV	6607376	6613353	639.484	481.237	664.598	657.33	491.793	516.609	985.262	1009.32
WBGene00001091	drh-2	pseudogene	IV	6613918	6618498	344.337	314.227	431.909	435.799	126.184	319.393	173.632	180.133
WBGene00001092	dro-1	protein_coding	III	13342684	13343712	364.592	374.845	390.206	419.456	430.319	327.09	673.329	663.347
WBGene00001093	drp-1	protein_coding	IV	5538488	5541365	1348.41	1113.4	1585.53	1710.51	1076.34	1112.75	2210.78	2227.36
WBGene00001094	dars-1	protein_coding	III	9489176	9491215	2005.26	1756.7	2333.27	2356.95	1853.93	1637.05	2764.99	2679.12
WBGene00001095	dars-2	protein_coding	V	12048745	12052181	309.614	225.154	284.221	257.848	285.801	230.887	429.033	377.421
WBGene00001096	dsc-1	protein_coding	X	15031180	15034832	5.78718	7.42267	5.04691	0	7.54945	4.81014	1.00949	2.85925
WBGene00001099	dsc-4	protein_coding	IV	315056	320544	972.247	1127.01	1426.15	1501.69	731.218	1078.75	795.478	743.406
WBGene00001101	dsh-1	protein_coding	II	5214400	5225384	625.016	849.896	576.145	552.012	532.776	658.669	239.249	251.614
WBGene00001102	dsh-2	protein_coding	II	5078233	5081174	801.525	703.917	840.709	775.359	840.146	693.943	1478.9	1421.05
WBGene00001103	dsl-1	protein_coding	IV	1207218	1208080	5.78718	9.8969	8.23443	12.7108	28.0408	10.903	12.1139	8.57776
WBGene00001104	dsl-2	protein_coding	IV	1202651	1204970	47.7443	44.536	52.8597	34.5008	135.89	54.1943	101.958	42.8888
WBGene00001105	dsl-3	protein_coding	IV	1610273	1612924	30.3827	74.2267	8.23443	9.07914	61.4741	42.6499	9.0854	8.57776
WBGene00001106	dsl-4	protein_coding	X	14090389	14092054	4.34039	1.23711	0.796881	1.81583	0	1.60338	0	0
WBGene00001107	dsl-5	protein_coding	IV	11619363	11621009	4.34039	1.23711	6.9063	3.63166	4.31397	2.88609	0	2.85925
WBGene00001108	dsl-6	protein_coding	IV	11396765	11398317	10.1276	86.5979	2.65627	3.63166	56.0816	54.8356	2.01898	0
WBGene00001109	dsl-7	protein_coding	V	12993150	12994824	20.2551	29.6907	17.2657	3.63166	19.4129	25.0127	4.03796	0
WBGene00001110	duo-1	protein_coding	V	11554630	11558127	528.08	399.587	477.863	461.221	348.353	395.394	915.607	932.117
WBGene00001111	duo-2	pseudogene	IV	112408	118629	7.23398	3.71134	4.78128	7.26332	10.7849	9.29961	2.01898	8.57776
WBGene00001112	duo-3	protein_coding	I	10464289	10471056	811.652	695.257	776.959	704.542	734.454	663.158	1243.69	1446.78
WBGene00001113	dur-1	protein_coding	IV	9921938	9928230	649.611	752.164	1276.87	1267.45	518.755	685.285	79.7497	100.074
WBGene00001115	dyb-1	protein_coding	I	1483083	1490498	163.488	358.763	176.642	181.583	195.207	267.444	57.5409	71.4813
WBGene00001116	dyc-1	protein_coding	X	14049535	14063930	439.826	593.814	363.378	441.246	315.998	518.533	56.5314	51.4666
WBGene00001117	dyf-1	protein_coding	I	4989548	4994675	62.2122	80.4123	43.0316	27.2374	66.8666	76.9623	8.07592	11.437
WBGene00001118	dyf-2	protein_coding	III	13674879	13686445	159.148	209.072	93.7663	107.134	116.477	172.524	47.446	42.8888
WBGene00001119	dyf-3	protein_coding	IV	3396581	3399231	59.3186	60.6185	54.1879	47.2116	51.7677	49.3841	50.4745	40.0296
WBGene00001121	dyf-5	protein_coding	I	9359067	9364238	50.6378	81.6494	30.5471	39.9482	32.3548	62.8525	0	0
WBGene00001122	dyf-6	protein_coding	X	10379693	10386508	44.8507	61.8556	32.4065	39.9482	36.6688	49.3841	7.06643	2.85925
WBGene00001123	dyf-7	protein_coding	X	9698659	9701732	39.0635	148.453	21.5158	19.9741	84.1225	102.616	5.04745	8.57776
WBGene00001127	dyf-11	protein_coding	X	763752	766739	27.4891	54.4329	15.9376	16.3425	18.3344	45.8567	3.02847	11.437
WBGene00001129	dyf-13	protein_coding	II	7168793	7171355	26.0423	33.402	12.7501	10.895	28.0408	33.9917	0	0
WBGene00001130	dyn-1	protein_coding	X	15568890	15573021	1608.84	1790.1	1643.96	1656.04	1097.91	1528.34	1007.47	1123.69
WBGene00001131	dys-1	protein_coding	I	11526918	11557851	2583.98	4268.04	4067.81	4007.53	2256.21	3250.37	832.829	746.265
WBGene00001132	alp-1	protein_coding	IV	8852494	8862246	730.632	1176.49	1370.1	1401.82	749.553	1011.73	470.422	408.873
WBGene00001133	eat-2	protein_coding	II	14166878	14171658	13.0212	30.9278	18.0626	16.3425	20.4914	26.9368	6.05694	0
WBGene00001134	eat-3	protein_coding	II	9324874	9329665	1368.67	1266.8	1521.78	1485.35	1012.7	1122.05	1787.81	1901.4
WBGene00001135	eat-4	protein_coding	III	9136887	9141827	186.637	191.752	107.845	101.686	165.009	176.372	14.1329	11.437
WBGene00001136	eat-5	protein_coding	I	7308643	7311915	24.5955	28.4536	16.2032	29.0533	19.4129	30.1436	2.01898	8.57776
WBGene00001137	eat-6	protein_coding	V	13126414	13129995	12432.3	13517.9	15731.2	15425.5	8659.22	12446.7	11586.9	11640
WBGene00001145	eat-16	protein_coding	I	9722716	9726284	645.271	744.742	478.128	459.405	486.4	609.926	165.556	165.837
WBGene00001147	eat-18	protein_coding	I	14391860	14400222	34.7231	35.8763	36.1253	30.8691	18.3344	25.0127	0	0
WBGene00001148	eat-20	protein_coding	X	15510011	15524030	368.933	515.876	823.709	882.493	351.589	541.943	377.549	357.407
WBGene00001149	bcat-1	protein_coding	X	12877480	12880328	2157.17	2282.47	2289.44	2149.94	1641.47	1664.31	1637.39	1712.69
WBGene00001150	ech-1.1	protein_coding	V	15357664	15361512	156.254	278.35	105.985	125.292	179.03	129.232	70.6643	94.3554
WBGene00001151	ech-2	protein_coding	IV	11854993	11856351	212.679	192.99	263.236	292.348	268.545	189.52	348.274	311.659
WBGene00001152	ech-3	protein_coding	V	8022217	8023317	92.5949	110.103	60.2973	59.9224	99.2214	82.0931	51.484	31.4518
WBGene00001153	ech-4	protein_coding	II	10821031	10822391	729.185	934.02	953.6	938.784	750.631	684.323	1057.94	1063.64
WBGene00001154	ech-5	protein_coding	IV	797023	799920	409.443	350.103	510.004	517.511	387.179	326.769	518.878	488.932
WBGene00001155	ech-6	protein_coding	III	9751552	9752883	2346.7	2745.15	5558.24	5799.76	2629.37	2939.96	5086.82	4872.17
WBGene00001156	ech-7	protein_coding	I	14367616	14369773	986.715	559.175	705.505	699.094	923.19	1448.17	710.681	812.028
WBGene00001157	ech-8	protein_coding	IV	10236626	10239176	164.935	153.402	114.751	98.0548	215.699	161.3	75.7117	62.9036
WBGene00001158	ech-9	protein_coding	IV	10233310	10235329	121.531	85.3608	28.9533	23.6058	107.849	49.0635	4.03796	11.437
WBGene00001159	eff-1	protein_coding	II	8346684	8350563	130.212	154.639	156.454	219.715	97.0644	125.064	8.07592	14.2963
WBGene00001160	efk-1	protein_coding	III	6164906	6168547	1627.64	1562.47	1173.54	1093.13	1368.61	1652.12	1579.85	1512.55
WBGene00001161	efl-1	protein_coding	V	16958590	16965675	416.677	420.618	462.191	530.222	417.377	359.799	817.686	729.11
WBGene00001162	efl-2	protein_coding	II	13406140	13411895	244.508	230.103	245.174	261.479	199.521	211.646	388.653	411.733
WBGene00001163	efn-2	protein_coding	IV	10576350	10578288	150.467	180.618	172.923	167.056	166.088	164.507	26.2467	25.7333
WBGene00001164	efn-3	protein_coding	X	13475876	13477456	7.23398	9.8969	4.25003	9.07914	10.7849	11.2237	37.3511	22.874
WBGene00001165	efn-4	protein_coding	IV	559234	568147	115.744	189.278	90.3131	118.029	193.05	157.773	76.7212	42.8888
WBGene00001166	eftu-2	protein_coding	III	6009560	6012840	1837.43	1588.45	2589.06	2580.29	1657.64	1592.8	2851.81	3016.51
WBGene00001167	eef-2	protein_coding	I	9163531	9166952	47427.4	42188	62791.5	62224.8	33017	39414	53761.4	56124.3
WBGene00001168	eef-1A.1	protein_coding	III	6970026	6971712	72568.4	65555.8	94729.4	95630.6	46507.9	62944.9	95699.6	98935.9
WBGene00001169	eef-1A.2	protein_coding	X	7823654	7825769	6812.96	8334.43	18822.6	18773.9	4550.16	6792.24	3915.81	3985.8
WBGene00001170	egl-1	protein_coding	V	14431308	14432359	13.0212	16.0825	4.25003	5.44749	7.54945	9.62028	4.03796	2.85925
WBGene00001171	egl-2	protein_coding	V	1289373	1299332	282.125	341.443	217.548	205.189	238.347	340.558	20.1898	17.1555
WBGene00001172	egl-3	protein_coding	V	10169177	10173753	3281.33	3017.32	2347.61	2398.71	1743.92	2465.36	370.483	300.222
WBGene00001173	egl-4	protein_coding	IV	1848071	1880596	4065.5	4376.9	4426.94	4586.78	3224.69	3901.67	4228.75	4383.24
WBGene00001174	egl-5	protein_coding	III	7814374	7817141	57.8718	69.2783	57.1098	56.2907	53.9247	63.1732	4.03796	2.85925
WBGene00001175	egl-6	protein_coding	X	5931122	5934532	57.8718	45.7732	39.844	39.9482	17.2559	35.9157	50.4745	42.8888
WBGene00001177	egl-8	protein_coding	V	20818	43704	2592.66	3017.32	2274.3	2220.76	1789.22	2509.93	952.958	986.442
WBGene00001178	egl-9	protein_coding	V	10468517	10476915	596.08	601.237	444.659	448.51	451.889	603.513	334.141	288.785
WBGene00001179	egl-10	protein_coding	V	12453290	12463008	653.952	785.566	590.754	604.671	558.659	731.783	220.069	211.585
WBGene00001182	egl-13	protein_coding	X	5663837	5674067	280.678	334.02	308.924	314.138	207.071	365.571	93.8825	122.948
WBGene00001184	egl-15	protein_coding	X	11016400	11023421	363.146	520.824	321.94	330.481	354.824	386.415	53.5029	28.5925
WBGene00001185	egl-17	protein_coding	X	489685	492318	5.78718	7.42267	12.2188	5.44749	2.15699	6.09285	0	2.85925
WBGene00001186	egl-18	protein_coding	IV	1902322	1917840	380.507	633.402	494.863	490.274	489.636	485.183	398.748	351.688
WBGene00001187	egl-19	protein_coding	IV	7405582	7418740	1326.71	1824.74	1499.73	1392.74	1088.2	1623.9	197.86	223.022
WBGene00001188	egl-20	protein_coding	IV	9812357	9815532	221.36	246.185	184.079	177.951	153.146	207.157	38.3606	25.7333
WBGene00001189	egl-21	protein_coding	IV	10478442	10481844	2051.56	1939.79	1566.93	1456.29	1201.44	1566.5	309.913	314.518
WBGene00001190	egl-23	protein_coding	IV	13989081	14012074	128.765	97.7319	90.5788	79.8965	75.4945	94.5995	34.3226	17.1555
WBGene00001193	egl-26	protein_coding	II	69654	71279	206.892	273.402	179.033	174.32	189.815	217.098	202.907	245.896
WBGene00001194	egl-27	protein_coding	II	6835008	6847908	2738.78	3007.42	2373.64	2409.61	2224.93	2615.43	2664.04	2827.8
WBGene00001196	egl-30	protein_coding	I	1835661	1841965	2779.29	4041.65	3966.87	3993.01	2345.72	3346.9	1172.02	1163.72
WBGene00001202	egl-36	protein_coding	X	10734326	10744355	33.2763	44.536	32.6721	29.0533	31.2763	47.1394	17.1613	31.4518
WBGene00001204	egl-38	protein_coding	IV	10106599	10110517	28.9359	58.1443	29.4846	25.4216	37.7473	54.1943	4.03796	14.2963
WBGene00001207	egl-43	protein_coding	II	9955185	9963020	203.998	336.495	159.907	176.135	229.719	280.592	17.1613	11.437
WBGene00001208	egl-44	protein_coding	II	5928802	5940830	471.655	585.154	440.941	390.403	448.653	510.837	186.756	180.133
WBGene00001209	egl-45	protein_coding	III	7824377	7828626	4496.64	3859.79	5825.73	5572.78	3143.81	3501.14	6081.16	6493.36
WBGene00001210	egl-46	protein_coding	V	6679123	6681573	62.2122	379.794	74.6411	81.7123	196.286	198.499	7.06643	5.71851
WBGene00001211	egl-47	protein_coding	V	9899578	9907647	43.4039	30.9278	21.7814	27.2374	33.4333	35.5951	3.02847	0
WBGene00001214	ego-1	protein_coding	I	7650341	7656338	1636.33	1425.15	1751.28	1670.56	1193.89	1378.59	3320.21	3385.36
WBGene00001215	ego-2	protein_coding	I	11400143	11416433	1255.82	1172.78	1697.36	1676.01	945.838	1162.13	1866.55	1992.9
WBGene00001223	ehn-3	protein_coding	IV	5416699	5419222	0	8.65979	1.06251	0	8.62794	8.97893	0	0
WBGene00001224	ehs-1	protein_coding	II	5820712	5823862	962.119	1032.99	1010.18	1024.13	762.495	971.969	1313.35	1329.55
WBGene00001225	eif-3.B	protein_coding	II	14795404	14798235	2764.83	2701.85	4033.28	3822.32	2154.83	2308.87	3690.69	3794.23
WBGene00001226	eif-3.C	protein_coding	I	9976426	9979662	3554.78	3262.27	4880.89	4806.5	3087.73	2882.24	5078.74	5123.78
WBGene00001227	eif-3.D	protein_coding	III	8969635	8971578	1947.39	1671.34	2532.49	2467.71	1466.75	1519.68	2752.88	2636.23
WBGene00001228	eif-3.E	protein_coding	I	10640465	10642281	1506.11	1187.63	1793.25	1745.01	1136.73	1183.3	1899.86	1729.85
WBGene00001229	eif-3.F	protein_coding	II	9331643	9333970	1286.2	1145.57	1337.96	1283.79	1282.33	1003.72	1244.7	1352.43
WBGene00001230	eif-3.G	protein_coding	II	8442767	8444175	966.459	909.278	1103.41	1118.55	809.948	793.032	1120.53	1169.43
WBGene00001231	eif-3.H	protein_coding	I	4444719	4446613	1082.2	955.051	1344.87	1405.45	898.385	844.02	1442.56	1403.89
WBGene00001232	eif-3.I	protein_coding	I	2485861	2489787	1229.78	1031.75	1625.64	1621.54	1046.14	1002.11	1647.49	1646.93
WBGene00001233	eif-3.K	protein_coding	V	12954002	12955229	619.228	569.072	792.631	800.781	662.195	508.913	863.113	946.413
WBGene00001234	eif-6	protein_coding	I	12968946	12970272	697.355	598.762	1023.46	1107.66	576.994	567.276	1179.08	1238.06
WBGene00001235	elb-1	protein_coding	III	11718834	11719450	276.338	283.299	348.502	419.456	284.722	252.372	457.299	486.073
WBGene00001236	elc-1	protein_coding	III	1414238	1417190	610.548	648.247	588.629	651.883	530.619	590.044	728.851	786.295
WBGene00001237	elc-2	protein_coding	X	1777288	1778088	7.23398	7.42267	1.85939	1.81583	1.07849	3.84811	0	0
WBGene00001239	elo-1	protein_coding	IV	9526366	9528336	2824.14	2423.5	2955.9	3054.22	1950.99	3222.15	3228.35	3239.53
WBGene00001240	elo-2	protein_coding	IV	17466062	17467408	1335.39	957.525	1677.17	1621.54	899.463	1599.53	1760.55	1884.25
WBGene00001241	elo-3	protein_coding	IV	7237718	7240488	949.098	906.803	1104.74	1096.76	844.46	1016.22	1253.79	1309.54
WBGene00001242	elo-4	protein_coding	III	9332269	9334274	17.3615	63.0927	75.7037	72.6332	59.3171	69.9074	12.1139	5.71851
WBGene00001243	elo-5	protein_coding	IV	5374616	5377117	1019.99	564.123	1301.31	1111.29	832.597	1261.54	1560.67	1821.34
WBGene00001244	elo-6	protein_coding	IV	5386629	5388559	1614.62	1145.57	2378.42	2393.26	1351.35	2676.36	3173.83	3190.93
WBGene00001245	elo-7	protein_coding	IV	9529947	9531400	1.4468	4.94845	2.9219	5.44749	6.47096	9.94096	6.05694	5.71851
WBGene00001246	elo-8	protein_coding	III	11230377	11232069	5.78718	1.23711	4.78128	5.44749	10.7849	7.37555	14.1329	8.57776
WBGene00001247	elo-9	protein_coding	II	14959526	14964108	75.2334	92.7834	162.298	154.345	90.5934	96.5235	92.873	77.1998
WBGene00001248	elp-1	protein_coding	V	20764971	20770161	137.446	204.124	121.657	118.029	146.675	167.072	72.6832	60.0443
WBGene00001249	elt-1	protein_coding	IV	9614995	9620280	186.637	195.464	155.126	157.977	228.641	180.22	96.911	111.511
WBGene00001250	elt-2	protein_coding	X	10481240	10483441	156.254	191.752	165.751	147.082	185.501	168.355	78.7402	100.074
WBGene00001251	elt-3	protein_coding	X	13934874	13941216	260.423	272.165	233.22	256.032	229.719	238.904	88.8351	131.526
WBGene00001252	elt-4	protein_coding	X	10475527	10475959	2.89359	16.0825	4.25003	1.81583	4.31397	4.48947	5.04745	2.85925
WBGene00001253	elt-6	protein_coding	IV	1917977	1921643	104.169	211.546	124.313	130.74	121.87	146.549	28.2657	40.0296
WBGene00001258	emb-4	protein_coding	V	18860285	18894974	2160.07	1912.58	2649.89	2645.66	1814.03	1856.39	3415.1	3222.38
WBGene00001259	emb-5	protein_coding	III	4715293	4720670	3508.48	3012.37	3856.9	3755.13	2385.63	2860.43	5303.86	5160.95
WBGene00001262	emb-8	protein_coding	III	5196680	5199677	1846.11	1553.81	1921.28	1935.67	1349.19	1733.25	2033.11	1995.76
WBGene00001263	emb-9	protein_coding	III	9336881	9344447	7011.17	9181.85	10139.2	10132.3	6818.23	7978.1	3538.26	3619.82
WBGene00001281	emb-27	protein_coding	II	8159865	8162170	788.504	654.432	827.428	791.701	715.041	649.369	1232.59	1349.57
WBGene00001284	emb-30	protein_coding	III	9435507	9441460	860.843	807.834	986.007	1007.79	748.474	775.074	1301.23	1326.69
WBGene00001303	sec-61.G	protein_coding	V	10896658	10897143	1387.48	1326.18	1538.51	1636.06	1320.08	1418.03	1852.41	2012.91
WBGene00001309	emr-1	protein_coding	I	1842445	1843227	415.23	411.958	481.316	435.799	414.141	372.305	710.681	777.717
WBGene00001310	end-1	protein_coding	V	13985128	13987074	10.1276	11.134	3.18752	1.81583	8.62794	2.88609	2.01898	0
WBGene00001311	end-3	protein_coding	V	14014695	14015980	4.34039	1.23711	4.51566	1.81583	7.54945	2.24473	4.03796	2.85925
WBGene00001320	ent-1	protein_coding	IV	11653417	11655470	1206.63	973.607	1528.15	1510.77	1032.12	1124.93	2284.47	2318.85
WBGene00001324	eor-1	protein_coding	IV	4793194	4799178	659.739	635.876	603.504	617.382	516.598	518.854	940.844	846.339
WBGene00001325	eor-2	protein_coding	X	14603017	14608660	523.74	559.175	413.05	386.772	345.118	439.968	388.653	423.17
WBGene00001328	epi-1	protein_coding	IV	10666823	10679291	3433.25	4461.03	6068.25	5914.16	2897.91	3530.64	2166.36	2052.94
WBGene00001329	epn-1	protein_coding	X	14815798	14818514	1530.71	1875.46	1667.87	1617.9	1340.57	1705.68	1274.99	1126.55
WBGene00001330	eps-8	protein_coding	IV	14879484	14900653	1621.86	2327.01	1995.39	2080.94	1501.26	2054.57	611.751	563.273
WBGene00001331	erd-2.1	protein_coding	X	10156858	10158829	441.273	450.309	691.958	715.437	485.322	405.335	387.644	406.014
WBGene00001332	eri-1	protein_coding	IV	415635	419958	397.869	450.309	481.05	468.484	469.144	404.693	880.275	786.295
WBGene00001333	erm-1	protein_coding	I	5284026	5291604	2993.42	2868.86	3396.57	3264.86	2493.48	2662.25	3323.24	3456.84
WBGene00001334	ero-1	protein_coding	I	14664449	14674841	645.271	629.69	808.834	831.65	628.761	642.956	951.949	923.539
WBGene00001335	F35A5.8	protein_coding	X	3800033	3803464	151.914	191.752	166.282	157.977	156.381	161.621	147.385	120.089
WBGene00001336	qars-1	protein_coding	IV	15008503	15013183	2037.09	1734.43	2609.52	2671.08	1599.41	1552.07	2760.95	2819.22
WBGene00001337	ears-1	protein_coding	I	10336395	10341178	3174.27	2636.29	3837.51	3867.72	2243.27	2534.3	4500.3	4694.89
WBGene00001338	ears-2	protein_coding	IV	388686	390468	196.764	202.886	204.267	230.61	237.268	194.971	264.486	283.066
WBGene00001340	etr-1	protein_coding	II	162374	170631	1131.39	1270.51	1361.6	1301.95	1062.32	1117.56	1371.9	1352.43
WBGene00001345	fos-1	protein_coding	V	6003601	6016087	480.336	486.185	391.8	395.851	293.35	425.217	117.101	140.103
WBGene00001352	evl-14	protein_coding	III	4303096	4313128	1759.3	1472.16	1660.96	1570.69	1383.71	1408.73	2337.98	2267.39
WBGene00001358	evl-20	protein_coding	II	8444307	8445177	163.488	158.35	134.938	143.45	156.381	138.211	200.888	188.711
WBGene00001362	exc-1	protein_coding	X	15470663	15477409	27.4891	50.7216	44.3597	45.3957	46.3752	49.3841	2.01898	2.85925
WBGene00001365	exc-4	protein_coding	I	14511431	14518719	522.293	502.268	462.191	504.8	466.987	477.807	658.187	594.725
WBGene00001366	exc-5	protein_coding	IV	8799081	8813670	471.655	528.247	333.096	314.138	387.179	476.845	83.7876	88.6369
WBGene00001368	exc-7	protein_coding	II	9575970	9581560	351.571	510.927	318.221	326.849	348.353	493.521	86.8161	88.6369
WBGene00001371	exl-1	protein_coding	II	14412202	14413475	199.658	184.33	226.314	212.452	224.327	214.853	280.638	308.799
WBGene00001372	exo-3	protein_coding	I	11907525	11909280	405.103	388.453	383.3	372.245	376.394	309.773	806.582	837.761
WBGene00001373	exp-1	protein_coding	II	6157144	6161094	17.3615	18.5567	24.7033	32.6849	20.4914	30.4642	3.02847	0
WBGene00001374	exp-2	protein_coding	V	6131400	6143970	263.317	298.144	231.361	283.269	163.931	264.558	20.1898	20.0148
WBGene00001377	eya-1	protein_coding	I	14220693	14231360	46.2975	155.876	61.3598	67.1857	154.225	120.254	12.1139	17.1555
WBGene00001385	far-1	protein_coding	III	9080371	9081179	6980.79	7917.52	9077	9451.39	5667.48	6783.26	3552.39	3128.02
WBGene00001386	far-2	protein_coding	III	9081828	9082511	13508.7	12322.9	8979.52	8981.09	12765	12603.9	13242.5	12800.9
WBGene00001387	far-3	protein_coding	V	12996787	12997522	33.2763	53.1958	62.9536	70.8173	61.4741	62.8525	53.5029	28.5925
WBGene00001388	far-4	protein_coding	V	12998427	12999659	0	1.23711	3.18752	1.81583	0	0.641352	2.01898	0
WBGene00001389	far-5	protein_coding	V	12995569	12996836	36.1699	29.6907	28.9533	38.1324	43.1397	34.633	13.1234	20.0148
WBGene00001390	far-6	protein_coding	IV	13328359	13329314	415.23	331.546	341.596	403.114	297.664	375.512	443.166	388.858
WBGene00001391	far-7	protein_coding	II	319789	321110	292.253	225.154	77.8287	74.449	251.289	251.41	8.07592	17.1555
WBGene00001392	far-8	protein_coding	III	842930	843802	552.676	450.309	406.675	368.613	390.414	412.71	186.756	148.681
WBGene00001393	fat-1	protein_coding	IV	13315644	13318811	4137.84	3497.32	3572.15	3480.94	3486.77	4252.49	3503.94	3428.25
WBGene00001394	fat-2	protein_coding	IV	13323873	13326395	7383	6006.18	5136.16	5082.51	7180.61	11253.8	3876.44	3817.1
WBGene00001395	fat-3	protein_coding	IV	9803023	9806119	3858.6	3123.71	1331.32	1309.21	2607.8	3695.47	892.389	869.213
WBGene00001396	fat-4	protein_coding	IV	9799429	9802226	3708.14	2899.79	2041.87	1988.33	3678.74	5035.9	2086.61	2044.37
WBGene00001397	fat-5	protein_coding	V	17725004	17726818	115.744	84.1236	296.44	328.665	74.416	181.823	275.591	291.644
WBGene00001398	fat-6	protein_coding	IV	11913692	11915687	5118.76	4416.49	2808.47	2825.43	3730.51	9144.4	2450.03	2561.89
WBGene00001399	fat-7	protein_coding	V	7151353	7153146	241.615	284.536	455.55	468.484	391.493	426.179	1022.61	1246.63
WBGene00001400	fax-1	protein_coding	X	3196064	3199349	27.4891	42.0618	19.1251	10.895	31.2763	33.0296	2.01898	0
WBGene00001401	fbf-1	protein_coding	II	6078263	6080843	316.848	259.794	323.002	372.245	191.972	266.482	690.491	651.91
WBGene00001402	fbf-2	protein_coding	II	6088863	6091480	381.954	222.68	334.424	337.744	228.641	268.406	592.57	526.103
WBGene00001403	fbl-1	protein_coding	IV	9540806	9546252	354.465	317.938	273.064	241.505	217.856	323.242	181.708	217.303
WBGene00001404	fbp-1	protein_coding	I	2581015	2586124	1077.86	1097.32	1602	1568.88	1040.75	1068.81	1515.24	1495.39
WBGene00001405	fce-1	protein_coding	I	9711066	9712719	820.333	680.412	751.458	717.252	786.221	734.028	916.616	894.946
WBGene00001406	fce-2	protein_coding	V	20425301	20431297	199.658	171.959	236.674	225.163	156.381	164.828	323.037	271.629
WBGene00001410	feh-1	protein_coding	III	2549920	2560684	290.806	461.443	238.799	297.796	310.606	412.71	26.2467	28.5925
WBGene00001411	fem-1	protein_coding	IV	5533140	5537962	721.951	680.412	704.974	708.173	584.543	608.964	932.768	983.583
WBGene00001412	fem-2	protein_coding	III	632019	634626	753.78	757.113	1009.91	922.441	847.696	683.361	1414.29	1401.03
WBGene00001413	fem-3	protein_coding	IV	9104966	9107607	377.614	309.278	275.986	261.479	413.063	305.604	587.523	591.865
WBGene00001414	fer-1	protein_coding	I	8623012	8631202	8.68077	17.3196	39.0471	38.1324	15.0989	44.2533	51.484	28.5925
WBGene00001423	fib-1	protein_coding	V	15000651	15002223	3653.16	3807.83	5410.55	5318.56	2690.84	2922	5761.16	6287.5
WBGene00001424	fis-1	protein_coding	II	6755174	6755965	0	0	0.531254	0	1.07849	2.56541	2.01898	2.85925
WBGene00001425	fis-2	protein_coding	X	8283275	8285219	117.19	117.526	121.126	125.292	150.989	112.557	158.49	120.089
WBGene00001426	fkb-1	protein_coding	IV	11036582	11037174	967.906	1062.68	1090.66	1133.08	839.068	899.497	1105.39	980.724
WBGene00001427	fkb-2	protein_coding	I	12918722	12919280	1796.92	1884.12	2265	2389.63	1553.03	1602.42	2491.42	2762.04
WBGene00001428	fkb-3	protein_coding	V	7225223	7226320	170.722	300.618	596.598	590.144	235.111	266.161	163.537	174.414
WBGene00001429	fkb-4	protein_coding	V	12785153	12787126	54.9782	68.0412	144.235	141.635	71.1805	67.9833	9.0854	5.71851
WBGene00001430	fkb-5	protein_coding	I	3898045	3899802	189.53	303.093	823.178	806.228	227.562	205.233	85.8066	114.37
WBGene00001431	fkb-6	protein_coding	V	20846158	20847727	2068.92	2171.13	2549.75	2671.08	1763.34	1789.37	3217.24	3085.13
WBGene00001432	fkb-7	protein_coding	I	10667808	10671357	36.1699	120	27.0939	23.6058	79.8085	84.9792	7.06643	5.71851
WBGene00001433	fkb-8	protein_coding	I	12915166	12918131	26.0423	53.1958	60.2973	70.8173	61.4741	48.4221	41.3891	34.311
WBGene00001434	fkh-2	protein_coding	X	3740207	3742323	20.2551	43.2989	10.8907	9.07914	47.4537	35.2744	2.01898	0
WBGene00001435	fkh-3	protein_coding	X	13421822	13423440	27.4891	23.5051	26.2971	18.1583	39.9042	24.6921	53.5029	40.0296
WBGene00001436	fkh-4	protein_coding	X	13427114	13428855	34.7231	27.2165	24.172	25.4216	31.2763	17.3165	33.3132	34.311
WBGene00001437	fkh-5	protein_coding	III	4844662	4846608	7.23398	2.47422	5.57816	1.81583	12.9419	4.48947	3.02847	2.85925
WBGene00001438	fkh-6	protein_coding	II	4379585	4383406	13.0212	24.7422	14.3439	14.5266	21.5699	21.806	13.1234	14.2963
WBGene00001439	fkh-7	protein_coding	IV	5584684	5610378	950.545	1060.21	508.941	512.064	593.171	844.02	157.48	165.837
WBGene00001440	fkh-8	protein_coding	II	6189623	6191393	52.0846	63.0927	35.0627	56.2907	48.5322	57.0804	5.04745	2.85925
WBGene00001441	fkh-9	protein_coding	X	3816847	3826963	1278.97	1243.3	939.257	962.389	733.375	1281.1	276.6	291.644
WBGene00001442	fkh-10	protein_coding	I	10163475	10165132	7.23398	7.42267	6.9063	5.44749	14.0204	13.4684	1.00949	2.85925
WBGene00001443	fli-1	protein_coding	III	8675297	8683736	1082.2	1135.67	1216.31	1231.13	855.245	1088.7	1679.79	1612.62
WBGene00001444	flp-1	protein_coding	IV	9144705	9146128	244.508	253.608	228.705	226.979	183.344	193.368	27.2562	31.4518
WBGene00001445	flp-2	protein_coding	X	10094430	10095245	66.5526	63.0927	43.5628	47.2116	35.5903	61.5698	4.03796	2.85925
WBGene00001446	flp-3	protein_coding	X	10091946	10092964	167.828	150.928	123.782	110.766	99.2214	125.705	28.2657	22.874
WBGene00001447	flp-4	protein_coding	II	10048868	10055594	85.3609	71.7525	60.2973	58.1065	50.6892	65.7386	20.1898	14.2963
WBGene00001448	flp-5	protein_coding	X	8528250	8531076	179.403	164.536	128.032	128.924	103.535	135.325	15.1423	31.4518
WBGene00001449	flp-6	protein_coding	V	9471975	9473792	189.53	186.804	125.376	121.661	124.027	114.802	76.7212	74.3406
WBGene00001450	flp-7	protein_coding	X	5885865	5886833	92.5949	76.701	71.7193	78.0806	46.3752	80.4897	16.1518	11.437
WBGene00001451	flp-8	protein_coding	X	14881419	14882267	138.892	133.608	80.7506	79.8965	81.9655	95.5615	4.03796	5.71851
WBGene00001452	flp-9	protein_coding	IV	12754558	12757570	445.613	419.381	259.783	256.032	255.603	312.98	48.4555	51.4666
WBGene00001453	flp-10	protein_coding	IV	7868907	7870081	160.594	118.763	59.766	52.659	126.184	108.709	49.465	31.4518
WBGene00001454	flp-11	protein_coding	X	4677334	4678129	222.807	277.113	176.907	226.979	172.559	193.368	30.2847	17.1555
WBGene00001455	flp-12	protein_coding	X	4591281	4592350	199.658	167.01	87.3912	85.344	118.634	140.777	35.3321	20.0148
WBGene00001456	flp-13	protein_coding	IV	7696932	7698420	125.871	101.443	117.407	99.8706	64.7096	104.22	10.0949	5.71851
WBGene00001457	flp-14	protein_coding	III	12910510	12914783	244.508	179.381	210.376	197.925	221.091	187.596	42.3986	31.4518
WBGene00001458	flp-15	protein_coding	III	13663400	13667839	172.169	147.216	100.141	101.686	112.163	136.929	20.1898	22.874
WBGene00001459	flp-16	protein_coding	II	13235306	13237417	189.53	188.041	90.8444	83.5281	102.457	145.587	29.2752	48.6073
WBGene00001460	flp-17	protein_coding	IV	17190204	17191891	300.933	184.33	141.048	132.556	184.422	171.882	38.3606	20.0148
WBGene00001461	flp-18	protein_coding	X	3012182	3018555	319.742	340.206	251.017	239.689	242.661	242.431	41.3891	45.7481
WBGene00001462	flp-19	protein_coding	X	10604686	10605831	143.233	136.082	87.3912	99.8706	85.201	96.2028	20.1898	11.437
WBGene00001463	flp-20	protein_coding	X	9349276	9349894	67.9994	42.0618	28.6877	43.5799	36.6688	45.2153	8.07592	5.71851
WBGene00001464	flp-21	protein_coding	V	7793367	7794025	57.8718	65.567	58.4379	41.7641	50.6892	66.7006	17.1613	5.71851
WBGene00001465	flr-1	protein_coding	X	13452667	13456542	79.5738	79.1752	66.4067	79.8965	69.0236	84.9792	55.5219	62.9036
WBGene00001466	flr-2	protein_coding	V	11936505	11937810	44.8507	30.9278	29.7502	9.07914	39.9042	37.5191	12.1139	11.437
WBGene00001468	flr-4	protein_coding	X	15089397	15093585	78.127	86.5979	61.0942	61.7382	87.3579	68.304	19.1803	20.0148
WBGene00001470	baz-2	protein_coding	III	7650553	7656032	666.973	776.907	777.49	749.937	591.014	606.719	672.32	634.754
WBGene00001475	fmi-1	protein_coding	V	13019061	13033401	774.036	1934.84	717.724	719.068	1005.16	1643.79	41.3891	45.7481
WBGene00001476	fmo-1	protein_coding	IV	10661857	10664404	225.7	287.01	214.627	232.426	340.804	396.676	66.6263	54.3258
WBGene00001477	fmo-2	protein_coding	IV	10682524	10684367	243.062	144.742	43.0316	39.9482	257.76	1313.17	10.0949	5.71851
WBGene00001478	fmo-3	protein_coding	III	10694681	10698864	99.8289	136.082	86.3287	99.8706	103.535	122.498	74.7022	77.1998
WBGene00001479	fmo-4	protein_coding	V	13603276	13606701	293.699	287.01	581.192	584.697	299.821	355.63	128.205	168.696
WBGene00001480	fmo-5	protein_coding	V	899304	903665	188.083	178.144	137.063	138.003	161.774	114.802	82.7781	111.511
WBGene00001481	fog-1	protein_coding	I	3211046	3217267	176.509	145.979	246.502	230.61	134.812	138.211	276.6	368.844
WBGene00001482	fog-2	protein_coding	V	20199254	20200648	251.742	189.278	216.752	201.557	265.309	192.406	428.024	411.733
WBGene00001483	fog-3	protein_coding	I	10016765	10018121	11.5744	1.23711	31.0783	23.6058	6.47096	7.69623	5.04745	14.2963
WBGene00001484	fox-1	protein_coding	X	2445117	2459893	267.657	399.587	272.533	245.137	300.9	327.731	186.756	134.385
WBGene00001485	fre-1	protein_coding	V	20075916	20087735	410.89	389.69	450.769	492.09	396.885	367.174	757.117	686.221
WBGene00001486	frh-1	protein_coding	II	5917422	5918564	122.978	90.3092	87.9225	83.5281	149.911	97.4856	136.281	171.555
WBGene00001487	frk-1	protein_coding	IV	10043181	10045739	11.5744	14.8453	7.43755	1.81583	8.62794	16.9958	21.1993	31.4518
WBGene00001488	frm-1	protein_coding	I	14875823	14900322	6417.98	6993.4	7230.36	6909.23	4312.89	7064.82	3965.27	4040.13
WBGene00001489	frm-2	protein_coding	III	5976781	5982126	270.551	458.969	264.564	270.559	277.173	384.811	136.281	122.948
WBGene00001490	frm-3	protein_coding	X	11572505	11585126	461.528	546.804	500.175	535.67	342.961	581.386	67.6358	34.311
WBGene00001491	frm-4	protein_coding	I	5402882	5412400	1108.25	1023.09	995.569	964.205	771.123	991.851	1249.75	1229.48
WBGene00001492	frm-5.1	protein_coding	IV	32463	48880	112.85	192.99	204.267	221.531	99.2214	127.308	136.281	125.807
WBGene00001493	frm-7	protein_coding	V	12302484	12306974	2251.21	2278.76	1231.18	1292.87	1426.85	2093.05	875.227	923.539
WBGene00001494	frm-8	protein_coding	III	3200795	3219150	366.039	432.989	343.19	337.744	335.411	380.963	78.7402	40.0296
WBGene00001495	F31B12.3	protein_coding	X	10819442	10820611	17.3615	22.268	4.25003	9.07914	19.4129	12.827	10.0949	20.0148
WBGene00001496	frm-10	protein_coding	V	13463207	13467131	1001.18	762.061	614.129	544.749	814.262	795.918	769.231	797.732
WBGene00001497	fars-1	protein_coding	I	6211981	6214685	1141.52	1015.67	1612.36	1481.72	1004.08	926.113	1910.96	1875.67
WBGene00001498	fars-3	protein_coding	II	8464848	8467072	1318.03	1175.26	1507.17	1501.69	1034.27	1068.49	1681.81	1835.64
WBGene00001499	fsn-1	protein_coding	III	4937322	4939453	826.12	743.505	786.787	829.834	710.727	654.5	1405.21	1340.99
WBGene00001500	ftn-1	protein_coding	V	7546468	7547579	121.531	157.113	56.0473	54.4749	99.2214	99.7303	14.1329	20.0148
WBGene00001501	ftn-2	protein_coding	I	3680180	3680927	1646.45	1625.57	1444.74	1523.48	1735.3	1589.91	1323.44	1283.8
WBGene00001502	ftt-2	protein_coding	X	11603708	11605419	4982.76	5998.76	5490.24	5618.17	4287.01	5838.55	2390.47	2453.24
WBGene00001503	fum-1	protein_coding	III	7465605	7467640	2252.66	2255.26	2776.07	2948.91	1636.07	1986.27	2631.74	2862.11
WBGene00001505	fut-1	protein_coding	II	8754070	8759593	138.892	175.67	166.548	105.318	185.501	162.583	67.6358	114.37
WBGene00001506	fut-2	protein_coding	V	6573939	6575890	30.3827	33.402	17.2657	23.6058	19.4129	16.9958	4.03796	0
WBGene00001507	fut-4	protein_coding	II	2819435	2822535	8.68077	2.47422	2.9219	5.44749	2.15699	8.33758	8.07592	2.85925
WBGene00001508	fut-8	protein_coding	V	5986990	5990483	182.296	247.422	241.189	252.4	181.187	233.773	82.7781	108.652
WBGene00001509	fzo-1	protein_coding	II	5833328	5836203	876.758	786.804	985.476	918.809	747.396	799.766	1321.42	1258.07
WBGene00001510	fzr-1	protein_coding	II	9640156	9644466	1688.41	1745.57	1585.26	1570.69	1267.23	1609.15	2386.43	2213.06
WBGene00001511	fzy-1	protein_coding	II	5500770	5503912	1114.03	1041.65	1254.82	1349.16	1105.46	975.176	2194.63	2198.77
WBGene00001512	gab-1	protein_coding	III	12771868	12779726	85.3609	79.1752	47.2816	36.3166	34.5118	57.401	5.04745	11.437
WBGene00001513	gad-1	protein_coding	V	6431333	6433496	1053.27	1000.82	1171.15	1167.58	837.989	856.847	1790.83	1787.03
WBGene00001514	xnd-1	protein_coding	III	5604460	5607556	1235.56	995.876	1469.45	1483.53	793.771	954.653	2491.42	2381.76
WBGene00001515	gap-1	protein_coding	X	2192504	2195348	212.679	179.381	167.611	141.635	156.381	169.317	28.2657	28.5925
WBGene00001516	gap-2	protein_coding	X	9472470	9516454	1019.99	1303.92	1237.56	1232.95	831.518	1167.26	640.016	663.347
WBGene00001517	gar-1	protein_coding	X	6479443	6484880	99.8289	91.5463	65.6098	74.449	49.6107	84.3378	8.07592	11.437
WBGene00001518	gar-2	protein_coding	III	6309366	6320873	250.296	253.608	175.845	172.504	161.774	247.883	18.1708	8.57776
WBGene00001519	gar-3	protein_coding	V	14564819	14579719	235.828	242.474	186.736	170.688	168.245	214.212	22.2088	20.0148
WBGene00001520	gas-1	protein_coding	X	15586786	15590397	1106.8	1178.97	1746.23	1788.59	936.132	1059.51	896.427	992.161
WBGene00001522	gbh-1	protein_coding	II	10690452	10693803	104.169	106.392	119.001	90.7914	131.576	89.148	82.7781	102.933
WBGene00001523	gbh-2	protein_coding	II	8485879	8487571	159.148	169.484	81.5474	92.6073	165.009	159.697	46.4365	34.311
WBGene00001526	gck-1	protein_coding	V	8947799	8956296	1128.5	1161.65	1028.77	1045.92	940.446	1094.15	1358.77	1338.13
WBGene00001527	gcs-1	protein_coding	II	9035562	9038301	930.29	854.845	1066.49	1084.05	866.03	920.982	1286.09	1235.2
WBGene00001528	gcy-1	protein_coding	II	9512490	9516936	1.4468	3.71134	1.85939	0	1.07849	1.60338	0	0
WBGene00001530	gcy-3	protein_coding	II	9502757	9507281	20.2551	23.5051	9.03131	16.3425	11.8634	13.1477	1.00949	0
WBGene00001531	gcy-4	protein_coding	II	10304139	10308826	10.1276	7.42267	11.1563	10.895	3.23548	6.09285	6.05694	0
WBGene00001532	gcy-5	protein_coding	II	10310400	10316219	10.1276	6.18556	7.17193	5.44749	6.47096	9.29961	3.02847	2.85925
WBGene00001533	gcy-6	protein_coding	V	10308291	10314053	10.1276	12.3711	13.0157	12.7108	9.70644	9.62028	1.00949	0
WBGene00001534	gcy-7	protein_coding	V	8387356	8392324	40.5103	13.6082	6.64067	5.44749	20.4914	17.3165	0	0
WBGene00001535	gcy-8	protein_coding	IV	7928152	7933782	41.9571	69.2783	30.0158	19.9741	48.5322	58.6837	2.01898	0
WBGene00001536	gcy-9	protein_coding	X	11332110	11337883	31.8295	43.2989	35.0627	21.7899	24.8053	41.3672	9.0854	5.71851
WBGene00001537	gcy-11	protein_coding	X	17046241	17055581	241.615	179.381	134.673	105.318	100.3	134.363	36.3416	25.7333
WBGene00001538	gcy-12	protein_coding	II	5312046	5319617	1170.46	1091.13	1158.66	1060.44	716.119	1086.77	502.726	591.865
WBGene00001539	gcy-13	protein_coding	V	12363754	12369537	4.34039	3.71134	2.9219	1.81583	8.62794	6.7342	0	0
WBGene00001540	gcy-14	protein_coding	V	14863134	14868281	7.23398	11.134	7.70318	5.44749	9.70644	12.5064	0	0
WBGene00001541	gcy-15	protein_coding	II	3192349	3197066	60.7654	59.3814	47.5472	49.0274	21.5699	42.0086	3.02847	8.57776
WBGene00001542	gcy-17	protein_coding	I	2223353	2233099	17.3615	16.0825	10.6251	7.26332	16.1774	18.5992	1.00949	2.85925
WBGene00001543	gcy-18	protein_coding	IV	12860097	12865956	81.0205	98.969	79.1568	87.1598	59.3171	108.709	10.0949	17.1555
WBGene00001544	gcy-19	protein_coding	II	3250975	3259354	73.7866	96.4948	43.0316	39.9482	42.0612	66.0593	14.1329	5.71851
WBGene00001545	gcy-20	protein_coding	V	16248583	16253787	5.78718	12.3711	5.84379	5.44749	7.54945	17.3165	4.03796	0
WBGene00001546	gcy-21	protein_coding	II	2659664	2664686	63.659	85.3608	65.8755	78.0806	46.3752	46.8187	7.06643	11.437
WBGene00001547	gcy-22	protein_coding	V	20820118	20825062	72.3398	101.443	51.7972	59.9224	47.4537	77.9243	6.05694	14.2963
WBGene00001548	gcy-23	protein_coding	IV	3282885	3289337	63.659	68.0412	42.7659	41.7641	36.6688	52.9116	11.1044	11.437
WBGene00001549	gcy-25	protein_coding	IV	15872933	15882377	5.78718	11.134	10.6251	7.26332	5.39247	8.33758	0	0
WBGene00001550	gcy-27	protein_coding	IV	17432977	17436652	8.68077	16.0825	4.25003	10.895	4.31397	7.05488	0	0
WBGene00001551	gcy-31	protein_coding	X	2419955	2427504	17.3615	34.6391	12.2188	16.3425	21.5699	35.9157	3.02847	2.85925
WBGene00001552	gcy-32	protein_coding	V	13912080	13915490	37.6167	23.5051	24.7033	18.1583	17.2559	22.768	0	0
WBGene00001553	gcy-33	protein_coding	V	11995805	12001797	23.1487	47.0103	23.6408	19.9741	30.1978	35.5951	5.04745	5.71851
WBGene00001554	gcy-34	protein_coding	V	13383019	13385898	13.0212	22.268	10.0938	9.07914	26.9623	27.2575	0	2.85925
WBGene00001555	gcy-35	protein_coding	I	13325230	13333513	85.3609	102.68	57.1098	65.3698	62.5526	71.1901	9.0854	0
WBGene00001556	gcy-36	protein_coding	X	15479017	15485711	21.7019	39.5876	33.7346	19.9741	32.3548	34.3123	2.01898	0
WBGene00001557	gcy-37	protein_coding	IV	2150647	2159169	37.6167	37.1134	43.8284	39.9482	24.8053	39.1225	5.04745	0
WBGene00001558	gdi-1	protein_coding	IV	14790818	14792887	3203.21	3261.03	4016.28	4011.17	2776.04	3013.71	3572.58	3739.9
WBGene00001559	gei-1	protein_coding	III	3344873	3363427	639.484	847.422	890.912	887.94	560.816	912.644	194.831	205.866
WBGene00001560	gei-3	protein_coding	X	12795201	12813639	991.055	852.37	905.256	884.309	568.366	930.282	798.506	663.347
WBGene00001561	gei-4	protein_coding	III	344306	354800	1658.03	2542.27	1696.82	1770.43	1946.68	2011.28	1509.19	1463.94
WBGene00001562	lin-66	protein_coding	IV	13888079	13893986	1639.22	2010.31	1882.23	1792.22	1219.78	1826.89	1355.74	1255.21
WBGene00001563	gei-6	protein_coding	V	7226376	7230848	1210.97	1182.68	1307.42	1349.16	764.652	1057.59	1946.3	1864.23
WBGene00001564	icl-1	protein_coding	V	724332	728004	7192.02	9572.78	8213.18	8098.6	7822.31	18691.9	4089.44	3702.73
WBGene00001565	gei-8	protein_coding	III	8111168	8121232	1019.99	1268.04	1176.99	1236.58	826.126	1039.31	965.072	1083.66
WBGene00001566	acdh-13	protein_coding	IV	8496485	8498823	499.144	457.732	581.192	617.382	377.473	378.077	720.775	689.08
WBGene00001568	snpc-4	protein_coding	I	8962322	8966129	1050.37	1024.33	1208.6	1069.52	873.579	883.783	1922.07	1964.31
WBGene00001569	meg-3	protein_coding	X	1986469	1989607	597.527	452.783	720.911	735.411	477.772	504.744	1159.9	1163.72
WBGene00001570	gei-13	protein_coding	III	9631994	9637116	500.591	1363.3	952.804	909.73	737.689	1229.79	34.3226	31.4518
WBGene00001571	gei-14	protein_coding	II	8273543	8276231	520.846	487.422	538.957	568.354	400.121	459.208	1198.26	1169.43
WBGene00001572	gei-15	protein_coding	X	6820005	6823268	464.421	601.237	418.628	443.062	388.258	503.462	96.911	111.511
WBGene00001574	gei-17	protein_coding	I	9100843	9108140	1582.79	1536.49	1520.18	1410.9	1240.27	1551.11	2187.56	2130.14
WBGene00001575	gei-18	protein_coding	IV	13981062	13982525	10.1276	16.0825	7.96881	1.81583	8.62794	14.1098	1.00949	2.85925
WBGene00001577	gem-4	protein_coding	IV	11745640	11748689	141.786	155.876	65.6098	83.5281	174.716	130.195	63.5978	62.9036
WBGene00001578	ges-1	protein_coding	V	1427653	1432137	421.018	430.515	387.018	417.641	428.162	441.25	296.79	263.051
WBGene00001579	gex-2	protein_coding	IV	572769	583577	662.632	729.896	943.772	902.467	662.195	644.88	865.132	995.02
WBGene00001580	gex-3	protein_coding	IV	12404431	12408690	1205.18	1016.91	1100.49	1149.42	1049.37	971.969	1818.09	1847.08
WBGene00001581	gfi-1	protein_coding	V	6392537	6399931	3842.69	3904.33	5217.97	5487.44	1928.35	2977.16	3450.43	3428.25
WBGene00001582	gfi-2	protein_coding	I	9737816	9744146	1101.01	1368.25	1303.17	1332.82	1150.75	1219.53	1761.56	1649.79
WBGene00001583	gfi-3	protein_coding	X	14480572	14484702	205.445	228.866	314.768	317.77	240.504	210.364	337.169	388.858
WBGene00001584	nrde-4	protein_coding	IV	7646320	7654262	873.865	817.731	879.225	927.889	719.355	750.703	1429.44	1486.81
WBGene00001585	gfl-1	protein_coding	IV	11521290	11522214	211.232	209.072	194.173	207.005	285.801	204.591	315.97	294.503
WBGene00001586	lgc-57	protein_coding	II	10695013	10702555	54.9782	42.0618	33.469	43.5799	36.6688	57.0804	1.00949	2.85925
WBGene00001587	lgc-58	protein_coding	X	6075509	6081881	56.425	47.0103	24.4377	39.9482	31.2763	32.709	0	2.85925
WBGene00001588	lgc-56	protein_coding	II	5130381	5133472	44.8507	45.7732	41.969	34.5008	36.6688	37.1984	5.04745	5.71851
WBGene00001589	gip-1	protein_coding	III	2347591	2362056	726.291	602.474	777.755	822.571	560.816	582.989	1006.46	997.88
WBGene00001590	lipt-1	protein_coding	I	9226905	9228184	157.701	116.289	125.376	110.766	138.047	112.237	225.116	165.837
WBGene00001591	glc-1	protein_coding	V	16219634	16221917	282.125	238.763	104.391	96.2389	290.115	226.718	64.6073	60.0443
WBGene00001592	glc-2	protein_coding	I	4885041	4888002	120.084	176.907	102.266	76.2648	105.692	114.802	45.427	51.4666
WBGene00001593	glc-3	protein_coding	V	5449275	5453715	50.6378	44.536	31.344	23.6058	35.5903	41.0465	3.02847	0
WBGene00001594	glc-4	protein_coding	II	7172204	7174943	153.36	174.433	88.1881	105.318	129.419	152.963	8.07592	22.874
WBGene00001595	gld-1	protein_coding	I	7695681	7698222	6121.39	4963.3	6366.54	6063.05	3715.41	5095.54	12365.2	12077.5
WBGene00001596	gld-2	protein_coding	I	6369748	6386194	2796.66	2517.52	2813.79	2707.4	2028.65	2437.78	4185.34	3774.21
WBGene00001597	gld-3	protein_coding	II	7132643	7137522	2259.89	1787.63	2450.14	2293.39	1838.83	1916.68	4536.65	4417.55
WBGene00001598	glh-1	protein_coding	I	6854478	6857536	2727.21	2397.52	3297.49	3281.2	1705.1	2107.8	5444.18	6367.56
WBGene00001599	glh-2	protein_coding	I	6513928	6517507	1399.05	1169.07	1462.01	1449.03	1021.33	1170.47	2646.88	2716.29
WBGene00001600	glh-3	protein_coding	I	5792321	5795114	481.783	432.989	430.05	484.826	458.36	426.82	836.867	869.213
WBGene00001601	glh-4	protein_coding	I	3727027	3731179	1008.42	920.412	1451.65	1487.16	926.426	884.425	2468.2	2461.82
WBGene00001602	gln-1	protein_coding	X	6058255	6060242	241.615	316.701	236.939	217.899	252.367	240.507	132.243	137.244
WBGene00001603	gln-2	protein_coding	III	9943243	9944823	8.68077	2.47422	18.0626	27.2374	33.4333	40.0845	83.7876	97.2146
WBGene00001604	gln-3	protein_coding	IV	16167781	16170678	1325.26	2272.58	2316.8	2327.89	1524.99	2185.09	1047.85	972.146
WBGene00001605	gln-4	pseudogene	III	13601760	13603156	7.23398	0	5.04691	9.07914	1.07849	6.41352	6.05694	8.57776
WBGene00001606	gln-5	protein_coding	IV	17272231	17273652	1439.56	1311.34	1683.81	1628.8	1466.75	1282.38	3101.15	3262.41
WBGene00001607	gln-6	protein_coding	IV	9739261	9740901	3368.14	3107.63	4048.15	4212.72	3106.06	3015.32	7432.87	7185.3
WBGene00001608	R07B1.8	protein_coding	X	9870632	9872654	26.0423	50.7216	36.9221	25.4216	34.5118	62.5318	4.03796	0
WBGene00001609	glp-1	protein_coding	III	9092241	9099698	2463.89	2073.4	2496.89	2498.58	1435.47	1916.04	4943.47	4534.78
WBGene00001612	glr-1	protein_coding	III	8584163	8588642	73.7866	138.557	60.8286	56.2907	76.573	157.131	3.02847	5.71851
WBGene00001613	glr-2	protein_coding	III	7138640	7144959	49.191	58.1443	50.2035	29.0533	25.8838	63.8146	6.05694	2.85925
WBGene00001614	glr-3	protein_coding	I	7117808	7121545	24.5955	6.18556	11.1563	10.895	5.39247	11.5443	0	0
WBGene00001615	glr-4	protein_coding	II	7785100	7794322	218.466	191.752	138.126	128.924	125.105	178.296	27.2562	8.57776
WBGene00001616	glr-5	protein_coding	V	8716495	8720516	166.381	205.361	141.845	141.635	180.108	202.347	10.0949	14.2963
WBGene00001617	glr-6	protein_coding	X	6836210	6840720	94.0417	111.34	101.204	83.5281	77.6515	103.578	40.3796	37.1703
WBGene00001618	glr-7	protein_coding	X	2413909	2419877	17.3615	18.5567	9.03131	5.44749	18.3344	15.0718	1.00949	0
WBGene00001619	glr-8	protein_coding	X	6505980	6509957	13.0212	29.6907	7.96881	12.7108	17.2559	16.6752	6.05694	2.85925
WBGene00001620	glt-1	protein_coding	X	3496026	3499169	1141.52	1096.08	1075.26	1055	630.918	927.716	546.134	611.88
WBGene00001621	glt-3	protein_coding	IV	10130257	10133283	133.105	100.206	96.4225	108.95	97.0644	143.022	20.1898	37.1703
WBGene00001622	glt-4	protein_coding	X	6403422	6408411	432.592	381.031	274.924	232.426	280.408	348.896	91.8635	57.1851
WBGene00001623	glt-5	protein_coding	II	9706481	9708885	72.3398	66.8041	54.9848	39.9482	77.6515	105.182	10.0949	5.71851
WBGene00001624	glt-6	protein_coding	IV	7503622	7506447	50.6378	38.3505	51.7972	78.0806	53.9247	64.4559	14.1329	20.0148
WBGene00001625	glt-7	protein_coding	IV	532135	535688	26.0423	35.8763	28.6877	32.6849	25.8838	33.0296	4.03796	0
WBGene00001626	gly-1	protein_coding	II	10899985	10902204	5.78718	7.42267	3.45315	7.26332	2.15699	5.13082	0	2.85925
WBGene00001627	gly-2	protein_coding	I	6507894	6511619	124.424	110.103	112.36	114.397	108.928	118.971	74.7022	82.9184
WBGene00001628	gly-3	protein_coding	III	7914306	7917767	775.482	783.092	1009.65	1000.52	748.474	766.416	1161.92	1203.75
WBGene00001629	gly-4	protein_coding	V	19881372	19895350	554.123	800.412	858.24	858.887	725.826	677.268	829.8	731.969
WBGene00001630	gly-5	protein_coding	III	13187390	13204903	857.95	998.35	1270.49	1207.53	926.426	1012.37	1072.08	1080.8
WBGene00001631	gly-6	protein_coding	III	4324280	4331228	409.443	550.515	514.254	472.116	371.002	390.584	152.433	177.274
WBGene00001632	gly-7	protein_coding	V	1815851	1821323	875.311	1015.67	1439.7	1447.22	992.214	892.121	1549.57	1455.36
WBGene00001633	gly-8	protein_coding	III	11625242	11628235	157.701	230.103	573.754	648.251	186.579	270.971	166.566	197.288
WBGene00001635	gly-10	protein_coding	IV	13779096	13782396	730.632	700.206	1023.99	929.704	614.741	665.082	1324.45	1320.98
WBGene00001636	gly-11	protein_coding	III	12171354	12177245	91.1481	154.639	170.798	170.688	107.849	119.612	76.7212	82.9184
WBGene00001637	gly-12	protein_coding	X	7485864	7490707	111.403	145.979	177.704	183.399	101.378	103.899	36.3416	54.3258
WBGene00001638	gly-13	protein_coding	X	9293666	9296622	245.955	295.67	291.393	256.032	239.425	230.566	223.097	251.614
WBGene00001639	gly-14	protein_coding	III	3490337	3493238	26.0423	17.3196	23.1095	18.1583	32.3548	16.6752	22.2088	25.7333
WBGene00001640	gly-15	protein_coding	I	12462176	12465816	0	2.47422	5.84379	1.81583	3.23548	0.320676	0	0
WBGene00001643	gly-18	protein_coding	I	7110234	7112443	33.2763	28.4536	13.8126	18.1583	20.4914	32.3883	1.00949	0
WBGene00001644	gly-19	protein_coding	I	7112867	7115055	56.425	66.8041	62.4223	65.3698	94.9074	84.0172	29.2752	34.311
WBGene00001645	gly-20	protein_coding	V	11282572	11286039	883.992	731.133	940.053	1000.52	867.108	820.61	1376.94	1298.1
WBGene00001646	gna-1	protein_coding	V	10319654	10320151	30.3827	37.1134	46.7503	58.1065	43.1397	26.9368	18.1708	17.1555
WBGene00001647	gna-2	protein_coding	I	7699682	7700958	833.354	611.134	700.724	702.726	724.747	640.07	1449.63	1398.18
WBGene00001648	goa-1	protein_coding	I	7522116	7526716	2340.92	2528.66	2354.25	2146.31	2247.58	2496.46	1880.68	2004.34
WBGene00001649	gob-1	protein_coding	X	15493602	15497504	504.932	523.299	608.817	640.988	644.939	573.69	461.337	448.903
WBGene00001650	gon-1	protein_coding	IV	9934206	9953433	1206.63	1400.41	2331.14	2235.29	822.89	1291.36	435.09	463.199
WBGene00001651	gon-2	protein_coding	I	8549513	8570998	1171.9	1211.13	1357.62	1327.37	672.98	1192.27	986.271	972.146
WBGene00001653	gon-4	protein_coding	IV	10197817	10202993	1297.78	999.587	1173.81	1138.52	993.292	1008.53	2038.16	2050.08
WBGene00001660	gop-1	protein_coding	III	5254438	5258886	490.464	410.721	472.285	435.799	392.571	422.33	666.263	651.91
WBGene00001661	gop-2	protein_coding	III	5259023	5260512	419.571	385.979	304.674	319.586	409.827	313.301	516.859	480.355
WBGene00001662	gop-3	protein_coding	III	5260694	5263837	695.909	653.195	694.614	728.147	661.116	605.116	823.743	803.45
WBGene00001663	gpa-1	protein_coding	V	11174433	11177677	20.2551	28.4536	18.3283	12.7108	29.1193	20.2026	18.1708	5.71851
WBGene00001664	gpa-2	protein_coding	V	8371005	8374034	54.9782	48.2474	27.0939	41.7641	49.6107	52.9116	3.02847	0
WBGene00001665	gpa-3	protein_coding	V	9356581	9359774	65.1058	79.1752	44.0941	39.9482	61.4741	58.3631	5.04745	11.437
WBGene00001666	gpa-4	protein_coding	IV	401695	405273	43.4039	44.536	25.5002	32.6849	45.2967	22.768	20.1898	34.311
WBGene00001667	gpa-5	protein_coding	X	2118894	2121061	1.4468	4.94845	2.65627	3.63166	1.07849	5.13082	0	0
WBGene00001668	gpa-6	protein_coding	X	13191212	13194390	11.5744	9.8969	4.25003	5.44749	10.7849	8.65826	2.01898	0
WBGene00001669	gpa-7	protein_coding	IV	10404008	10408747	253.189	221.443	166.814	187.03	248.053	248.524	25.2372	42.8888
WBGene00001670	gpa-8	protein_coding	V	12638666	12640484	15.9148	17.3196	3.45315	7.26332	12.9419	13.1477	0	2.85925
WBGene00001671	gpa-9	protein_coding	V	12645477	12649313	40.5103	27.2165	12.4845	16.3425	25.8838	26.6161	4.03796	0
WBGene00001672	gpa-10	protein_coding	V	6852521	6854811	15.9148	16.0825	6.10942	3.63166	16.1774	11.2237	5.04745	0
WBGene00001673	gpa-11	protein_coding	II	4247197	4255577	36.1699	21.0309	13.547	10.895	16.1774	18.9199	2.01898	0
WBGene00001674	gpa-12	protein_coding	X	9243557	9249107	72.3398	68.0412	78.6255	79.8965	74.416	73.4348	34.3226	51.4666
WBGene00001675	gpa-13	protein_coding	V	12752603	12754939	8.68077	23.5051	7.17193	5.44749	16.1774	12.5064	3.02847	2.85925
WBGene00001676	gpa-14	protein_coding	I	5942390	5945651	34.7231	45.7732	20.1876	16.3425	19.4129	31.7469	4.03796	2.85925
WBGene00001677	gpa-15	protein_coding	I	8531684	8534527	14.468	22.268	16.7345	23.6058	22.6484	15.7131	2.01898	5.71851
WBGene00001678	gpa-16	protein_coding	I	897286	907370	653.952	571.546	663.802	628.277	582.386	611.529	1322.43	1266.65
WBGene00001679	gpb-1	protein_coding	II	11742811	11748611	3907.79	4997.93	5101.63	5104.3	3035.96	4635.37	2884.11	3076.56
WBGene00001680	gpb-2	protein_coding	I	7318290	7321085	326.976	421.855	235.345	234.242	365.609	391.225	73.6927	65.7628
WBGene00001681	gpc-1	protein_coding	X	12881109	12884989	59.3186	58.1443	32.6721	29.0533	53.9247	52.5909	3.02847	2.85925
WBGene00001682	gpc-2	protein_coding	I	6757763	6758178	445.613	503.505	350.096	370.429	544.639	580.745	262.467	231.6
WBGene00001683	gpd-1	protein_coding	II	10394129	10395349	1235.56	1045.36	1775.45	1766.8	1153.99	1051.18	2686.25	2933.59
WBGene00001684	gpd-2	protein_coding	X	3113443	3114689	1668.16	1600.82	2526.38	2667.45	1093.59	1879.16	1604.08	1735.57
WBGene00001685	gpd-3	protein_coding	X	3112091	3113341	2598.44	2506.39	2672.21	2645.66	1757.94	2929.7	1946.3	1875.67
WBGene00001686	gpd-4	protein_coding	II	10171268	10172498	771.142	635.876	982.022	936.968	643.86	623.394	1749.45	1735.57
WBGene00001687	gpn-1	protein_coding	X	15681693	15687477	11.5744	24.7422	32.1408	25.4216	17.2559	21.4853	12.1139	11.437
WBGene00001688	gpr-1	protein_coding	III	8628932	8630776	157.701	142.268	210.111	208.82	168.245	156.49	312.942	320.236
WBGene00001689	gpr-2	protein_coding	III	9391330	9393164	192.424	173.196	245.174	230.61	212.463	177.655	304.866	357.407
WBGene00001690	grd-1	protein_coding	X	11109440	11115887	57.8718	90.3092	335.752	323.218	53.9247	104.861	8.07592	11.437
WBGene00001691	grd-2	protein_coding	V	20609794	20613929	18.8083	27.2165	64.2817	63.554	26.9623	55.1563	1.00949	5.71851
WBGene00001692	grd-3	protein_coding	IV	3439655	3440453	321.189	374.845	236.408	203.373	235.111	314.904	514.84	514.666
WBGene00001693	grd-4	protein_coding	X	8501222	8502288	4.34039	1.23711	3.71878	3.63166	1.07849	3.52744	10.0949	5.71851
WBGene00001694	grd-5	protein_coding	V	8619032	8619870	130.212	183.093	343.19	388.587	246.975	285.722	346.255	280.207
WBGene00001695	grd-6	protein_coding	V	9221866	9224354	28.9359	94.0205	369.753	355.902	99.2214	125.064	86.8161	97.2146
WBGene00001696	grd-7	protein_coding	X	7267870	7269479	1.4468	2.47422	5.84379	9.07914	0	3.84811	0	0
WBGene00001697	grd-8	protein_coding	V	7842528	7844353	0	2.47422	0.265627	0	9.70644	9.29961	0	5.71851
WBGene00001698	grd-9	protein_coding	V	5895321	5898602	7.23398	3.71134	5.31254	1.81583	2.15699	2.56541	0	2.85925
WBGene00001699	grd-10	protein_coding	IV	3441055	3441841	418.124	377.319	259.252	276.006	350.51	326.448	53.5029	54.3258
WBGene00001700	grd-11	protein_coding	V	20356772	20365773	5.78718	21.0309	21.7814	27.2374	19.4129	26.9368	3.02847	2.85925
WBGene00001701	grd-12	protein_coding	V	14978505	14980250	8.68077	28.4536	37.719	56.2907	24.8053	39.1225	1.00949	0
WBGene00001702	grd-13	protein_coding	IV	3438312	3439507	360.252	367.422	333.096	354.087	248.053	305.284	30.2847	37.1703
WBGene00001703	grd-14	protein_coding	X	8500021	8501037	26.0423	56.9072	290.065	301.428	57.1601	68.304	78.7402	88.6369
WBGene00001704	grd-15	protein_coding	I	13564567	13566362	5.78718	8.65979	12.4845	12.7108	9.70644	9.62028	5.04745	0
WBGene00001705	grd-16	protein_coding	IV	2476686	2480316	13.0212	51.9587	18.0626	21.7899	29.1193	34.633	5.04745	5.71851
WBGene00001707	grh-1	protein_coding	I	1258201	1268155	486.123	934.02	749.068	722.7	473.458	798.804	54.5124	65.7628
WBGene00001708	grk-1	protein_coding	X	9991248	9999208	533.868	562.886	626.083	584.697	378.551	545.47	499.697	468.918
WBGene00001709	grk-2	protein_coding	III	676122	680658	434.039	530.721	328.049	332.297	402.278	476.525	125.177	137.244
WBGene00001710	grl-1	protein_coding	V	5530725	5533855	27.4891	48.2474	44.0941	47.2116	67.9451	112.237	4.03796	0
WBGene00001711	grl-2	protein_coding	V	12945075	12946858	10.1276	18.5567	21.5158	9.07914	14.0204	22.4473	3.02847	2.85925
WBGene00001712	grl-3	protein_coding	V	11411511	11412894	1.4468	0	1.85939	1.81583	0	1.92406	2.01898	0
WBGene00001713	grl-4	protein_coding	IV	7309838	7310760	235.828	335.257	722.239	728.147	352.667	506.348	223.097	191.57
WBGene00001714	grl-5	protein_coding	V	4412748	4414663	63.659	155.876	389.409	428.536	141.283	215.494	1.00949	14.2963
WBGene00001715	grl-6	protein_coding	X	6449959	6450939	8.68077	14.8453	23.3752	21.7899	18.3344	21.806	0	0
WBGene00001716	grl-7	protein_coding	V	11344828	11347012	120.084	452.783	1010.44	1091.31	312.763	527.833	4.03796	8.57776
WBGene00001717	grl-8	protein_coding	V	6731831	6733095	8.68077	12.3711	6.10942	10.895	11.8634	8.0169	1.00949	17.1555
WBGene00001718	grl-9	protein_coding	V	6730216	6731694	2.89359	6.18556	9.03131	3.63166	1.07849	5.45149	0	0
WBGene00001719	grl-10	protein_coding	V	7774545	7775759	59.3186	113.814	130.954	141.635	136.969	145.908	29.2752	51.4666
WBGene00001720	grl-11	protein_coding	III	9117349	9118364	7.23398	11.134	0	0	20.4914	14.4304	0	0
WBGene00001721	grl-12	protein_coding	V	8635820	8637007	5.78718	12.3711	19.3908	18.1583	5.39247	6.7342	1.00949	0
WBGene00001722	grl-13	protein_coding	V	4362668	4364617	1.4468	3.71134	1.59376	5.44749	6.47096	5.45149	0	2.85925
WBGene00001723	grl-14	protein_coding	V	20825559	20827743	14.468	16.0825	12.2188	16.3425	10.7849	19.2406	0	2.85925
WBGene00001724	grl-15	protein_coding	III	12232632	12236014	57.8718	181.856	300.158	281.453	159.617	199.14	4.03796	0
WBGene00001725	grl-16	protein_coding	I	572173	575120	319.742	776.907	2974.76	2912.59	807.791	1261.86	297.799	377.421
WBGene00001726	grl-17	protein_coding	V	13561973	13563941	7.23398	2.47422	4.25003	1.81583	10.7849	3.52744	5.04745	5.71851
WBGene00001727	grl-18	protein_coding	V	5485631	5488866	23.1487	25.9794	14.8751	16.3425	18.3344	23.0887	6.05694	2.85925
WBGene00001728	grl-19	protein_coding	IV	251908	252554	0	0	1.85939	5.44749	0	0.320676	0	0
WBGene00001729	grl-20	protein_coding	IV	2126136	2128861	13.0212	4.94845	39.844	43.5799	1.07849	7.69623	2.01898	0
WBGene00001730	grl-21	protein_coding	IV	10737474	10738191	76.6802	81.6494	145.032	145.266	106.771	137.57	19.1803	31.4518
WBGene00001731	grl-22	protein_coding	III	5413137	5414011	5.78718	9.8969	9.56257	12.7108	4.31397	5.77217	7.06643	8.57776
WBGene00001732	grl-23	protein_coding	V	12575191	12576897	10.1276	2.47422	33.2034	25.4216	0	5.13082	1.00949	0
WBGene00001734	grl-25	protein_coding	III	8962293	8965707	13.0212	2.47422	95.8913	108.95	2.15699	9.29961	3.02847	2.85925
WBGene00001735	grl-26	protein_coding	IV	321514	322814	2.89359	2.47422	0.796881	0	2.15699	2.24473	3.02847	0
WBGene00001736	grl-27	protein_coding	V	3575055	3575859	2.89359	1.23711	8.50006	12.7108	1.07849	3.84811	15.1423	11.437
WBGene00001739	grl-30	protein_coding	V	3556286	3556804	0	0	1.32813	0	1.07849	1.60338	0	0
WBGene00001740	gro-1	protein_coding	III	5265113	5267204	205.445	174.433	167.079	159.793	220.013	170.279	260.448	223.022
WBGene00001743	grp-1	protein_coding	III	8085705	8088449	622.122	538.144	557.02	552.012	534.933	509.554	1028.67	1017.89
WBGene00001744	gars-1	protein_coding	III	5159729	5163627	1416.41	1272.99	2013.45	2091.83	1223.01	1231.4	2238.04	2398.91
WBGene00001745	gsa-1	protein_coding	I	1068484	1074343	946.204	1133.2	1419.51	1501.69	582.386	992.493	325.056	320.236
WBGene00001746	gsk-3	protein_coding	I	12819216	12825602	1577.01	1710.93	1468.12	1472.64	1344.88	1533.15	1465.78	1469.66
WBGene00001747	gsp-1	protein_coding	V	10682422	10686537	1808.49	1915.05	2022.22	2104.55	1561.66	1654.05	2218.86	2195.91
WBGene00001748	gsp-2	protein_coding	III	7336587	7338765	4350.51	3971.13	3178.76	3293.91	3563.34	3552.77	3852.21	3920.04
WBGene00001749	gst-1	protein_coding	III	9059331	9060181	1319.48	1092.37	1125.99	1162.13	1266.15	1066.25	1649.51	1715.55
WBGene00001750	gst-2	protein_coding	IV	10140330	10142061	15.9148	19.7938	9.29694	9.07914	11.8634	10.5823	6.05694	2.85925
WBGene00001751	gst-3	protein_coding	IV	10139380	10140243	24.5955	14.8453	13.8126	19.9741	23.7268	28.2195	2.01898	2.85925
WBGene00001752	gst-4	protein_coding	IV	10142225	10143099	37.6167	65.567	134.407	116.213	40.9827	65.4179	102.968	88.6369
WBGene00001753	gst-5	protein_coding	II	10950352	10951603	355.912	305.567	435.628	466.668	244.818	193.688	150.414	168.696
WBGene00001754	gst-6	protein_coding	II	4879891	4881105	143.233	127.423	184.611	201.557	157.46	109.671	43.408	45.7481
WBGene00001755	gst-7	protein_coding	II	4882062	4883358	852.163	738.556	1154.15	1242.03	991.135	727.294	1105.39	1100.81
WBGene00001756	gst-8	protein_coding	II	4883712	4884599	4.34039	12.3711	37.719	30.8691	3.23548	5.13082	17.1613	17.1555
WBGene00001757	gst-9	protein_coding	II	4891585	4893573	2.89359	13.6082	8.76569	12.7108	10.7849	8.33758	14.1329	14.2963
WBGene00001758	gst-10	protein_coding	V	2561690	2564645	137.446	157.113	306.268	295.98	115.399	132.119	232.183	220.163
WBGene00001759	gst-11	protein_coding	X	3632367	3633754	21.7019	27.2165	22.5783	14.5266	21.5699	17.9579	3.02847	0
WBGene00001760	gst-12	protein_coding	II	13616682	13618061	27.4891	29.6907	48.0785	47.2116	26.9623	21.806	14.1329	11.437
WBGene00001761	gst-13	protein_coding	II	9231457	9232344	371.826	246.185	275.455	257.848	303.057	245.959	237.23	214.444
WBGene00001762	gst-14	protein_coding	II	13614781	13616100	27.4891	28.4536	28.1564	21.7899	22.6484	15.7131	0	0
WBGene00001763	gst-15	protein_coding	II	13611770	13613196	89.7013	95.2577	33.469	39.9482	61.4741	86.9032	5.04745	0
WBGene00001764	gst-16	protein_coding	II	13622967	13624440	13.0212	22.268	18.5939	16.3425	10.7849	16.0338	10.0949	5.71851
WBGene00001767	gst-19	protein_coding	II	13625545	13627145	2.89359	7.42267	7.17193	5.44749	5.39247	9.62028	3.02847	0
WBGene00001768	gst-20	protein_coding	II	13608154	13609824	462.975	517.113	280.768	312.323	310.606	256.22	126.186	117.229
WBGene00001769	gst-21	protein_coding	V	1730684	1732018	10.1276	12.3711	15.4064	27.2374	8.62794	8.65826	3.02847	2.85925
WBGene00001770	gst-22	protein_coding	V	16231032	16232282	81.0205	59.3814	49.9378	41.7641	103.535	50.3462	32.3037	57.1851
WBGene00001771	gst-23	protein_coding	V	3243284	3244502	14.468	14.8453	10.6251	9.07914	16.1774	13.4684	0	2.85925
WBGene00001772	gst-24	protein_coding	II	13610443	13611366	86.8077	91.5463	158.579	170.688	47.4537	50.0255	20.1898	22.874
WBGene00001773	gst-25	protein_coding	I	1451081	1453070	2.89359	2.47422	3.18752	1.81583	0	2.88609	1.00949	5.71851
WBGene00001774	gst-26	protein_coding	II	15163817	15164553	201.105	175.67	265.892	221.531	141.283	162.262	196.85	174.414
WBGene00001775	gst-27	protein_coding	II	15164890	15165731	507.825	444.123	430.05	399.482	358.06	440.93	317.989	300.222
WBGene00001776	gst-28	protein_coding	II	15166194	15167577	122.978	107.629	90.0475	99.8706	116.477	110.954	66.6263	80.0591
WBGene00001777	gst-29	protein_coding	II	15168538	15169861	24.5955	9.8969	9.56257	12.7108	8.62794	16.0338	22.2088	17.1555
WBGene00001778	gst-30	protein_coding	II	4933883	4935054	4.34039	2.47422	1.06251	0	5.39247	5.45149	9.0854	14.2963
WBGene00001779	gst-31	protein_coding	II	15174229	15174965	7.23398	12.3711	3.45315	3.63166	12.9419	9.62028	0	0
WBGene00001780	gst-32	protein_coding	II	15177345	15178594	1.4468	1.23711	2.39064	5.44749	1.07849	0.962028	4.03796	5.71851
WBGene00001781	gst-33	protein_coding	V	3467451	3468562	21.7019	18.5567	17.5314	19.9741	12.9419	9.29961	0	8.57776
WBGene00001782	gst-34	protein_coding	II	15179906	15183239	5.78718	4.94845	1.32813	1.81583	0	1.92406	1.00949	2.85925
WBGene00001783	gst-35	protein_coding	II	15183807	15185389	28.9359	17.3196	18.8595	10.895	22.6484	13.7891	6.05694	11.437
WBGene00001784	gst-36	protein_coding	X	9861646	9862960	370.38	338.969	365.768	386.772	289.036	353.064	213.002	223.022
WBGene00001786	gst-38	protein_coding	V	15915162	15916070	37.6167	30.9278	40.1097	43.5799	43.1397	21.1646	20.1898	28.5925
WBGene00001787	gst-39	protein_coding	II	15171163	15171916	59.3186	74.2267	83.4068	76.2648	55.0031	65.4179	64.6073	65.7628
WBGene00001788	gst-40	protein_coding	IV	760502	762419	31.8295	32.1649	27.3596	30.8691	30.1978	35.5951	4.03796	2.85925
WBGene00001789	gst-41	protein_coding	V	7398396	7399302	47.7443	25.9794	14.6095	10.895	26.9623	32.0676	4.03796	5.71851
WBGene00001790	gst-42	protein_coding	X	11726264	11727936	205.445	199.175	224.189	208.82	140.204	164.186	129.215	151.54
WBGene00001791	gst-43	protein_coding	I	2901325	2903006	79.5738	60.6185	71.4536	63.554	61.4741	65.7386	58.5504	62.9036
WBGene00001792	gst-44	protein_coding	V	16390891	16392490	14.468	11.134	11.9532	10.895	15.0989	12.827	18.1708	5.71851
WBGene00001793	gsy-1	protein_coding	II	12866446	12878121	2041.43	1818.56	2353.19	2222.57	1723.43	1580.61	2685.24	2784.91
WBGene00001794	gta-1	protein_coding	IV	10180660	10183865	2207.81	2151.34	2377.89	2404.16	2213.07	2135.38	2061.38	1947.15
WBGene00001795	gtl-1	protein_coding	IV	11248884	11259535	1069.18	1104.74	729.677	728.147	877.893	984.796	401.777	385.999
WBGene00001796	gtl-2	protein_coding	IV	11273451	11281992	118.637	110.103	84.4693	98.0548	73.3375	99.0889	35.3321	48.6073
WBGene00001803	lite-1	protein_coding	X	6226126	6230769	63.659	61.8556	39.0471	30.8691	38.8258	57.7217	13.1234	17.1555
WBGene00001804	gur-3	protein_coding	X	10402522	10406303	2.89359	13.6082	2.39064	5.44749	3.23548	7.37555	2.01898	0
WBGene00001805	gur-4	protein_coding	II	14104770	14108094	17.3615	30.9278	15.672	14.5266	18.3344	23.4094	6.05694	0
WBGene00001806	gur-5	protein_coding	II	5285329	5288908	11.5744	4.94845	3.45315	1.81583	2.15699	2.56541	4.03796	0
WBGene00001808	gut-2	protein_coding	V	13497690	13498819	237.274	191.752	116.876	92.6073	336.49	191.123	249.344	251.614
WBGene00001811	haf-1	protein_coding	IV	17376427	17379310	73.7866	94.0205	78.0943	69.0015	65.7881	73.4348	99.9395	68.6221
WBGene00001812	haf-2	protein_coding	II	7353576	7356426	1180.59	1052.78	1160.79	1118.55	866.03	995.699	1983.65	1981.46
WBGene00001813	haf-3	protein_coding	V	15760455	15766172	708.93	727.422	955.46	909.73	639.546	652.576	1145.77	1063.64
WBGene00001814	haf-4	protein_coding	I	489969	496158	1061.95	1166.6	1697.09	1639.69	765.73	939.902	386.634	477.495
WBGene00001815	hmt-1	protein_coding	III	11091548	11099964	502.038	510.927	769.521	813.491	478.851	483.58	1004.44	986.442
WBGene00001816	haf-6	protein_coding	I	1162880	1175809	326.976	345.154	536.035	568.354	385.022	316.187	547.143	508.947
WBGene00001817	haf-7	protein_coding	V	14773258	14777697	144.68	142.268	216.22	190.662	93.8289	124.102	94.892	71.4813
WBGene00001819	haf-9	protein_coding	I	6081782	6086006	986.715	1026.8	1655.39	1557.98	802.399	883.142	436.099	488.932
WBGene00001820	ham-1	protein_coding	IV	12542183	12545737	86.8077	186.804	162.564	148.898	179.03	126.988	23.2183	22.874
WBGene00001821	ham-2	protein_coding	X	4554685	4559408	135.999	192.99	78.0943	70.8173	112.163	130.195	24.2277	5.71851
WBGene00001823	hap-1	protein_coding	III	5263943	5264996	159.148	159.588	171.329	154.345	163.931	130.515	185.746	165.837
WBGene00001824	hbl-1	protein_coding	X	5822142	5827755	965.013	3524.53	834.865	795.333	1413.9	2048.8	84.7971	91.4961
WBGene00001827	hcf-1	protein_coding	IV	7770770	7774275	1922.79	1837.11	2074.81	2115.44	1905.7	1680.98	3239.45	3242.39
WBGene00001828	hch-1	protein_coding	X	14696411	14699977	112.85	721.237	45.1566	58.1065	340.804	326.448	7.06643	11.437
WBGene00001829	hcp-1	protein_coding	V	6594194	6599208	3284.23	2988.86	3727.01	3658.9	2254.05	2725.75	6316.38	6284.64
WBGene00001830	hcp-2	protein_coding	V	9645859	9650211	1666.71	1389.28	1832.29	1853.96	1508.81	1424.44	3127.4	3208.08
WBGene00001831	hcp-3	protein_coding	III	9615306	9616470	548.336	638.35	679.208	659.146	616.898	520.778	1292.15	1335.27
WBGene00001832	hcp-4	protein_coding	I	3862833	3865938	1355.65	1223.5	1514.34	1523.48	1035.35	1116.27	2646.88	2644.81
WBGene00001833	hcp-6	protein_coding	I	5165148	5171313	1720.24	1472.16	1851.42	1975.62	1444.1	1398.47	3074.9	3325.31
WBGene00001834	hda-1	protein_coding	V	14525389	14527411	1420.75	1313.81	1508.49	1423.61	1215.46	1262.82	2364.22	2227.36
WBGene00001835	hda-2	protein_coding	II	8020780	8022561	399.316	363.711	379.315	372.245	413.063	351.461	622.855	609.021
WBGene00001836	hda-3	protein_coding	I	11912793	11917712	491.91	565.36	549.848	521.143	513.363	427.782	813.648	749.124
WBGene00001837	hda-4	protein_coding	X	16729559	16744767	908.588	1065.15	763.412	793.517	727.983	969.083	396.729	354.547
WBGene00001838	hda-10	protein_coding	II	13882705	13888034	260.423	241.237	332.83	314.138	278.251	247.562	504.745	457.481
WBGene00001839	hdl-1	protein_coding	IV	11946066	11949817	1.4468	1.23711	7.43755	9.07914	8.62794	13.7891	20.1898	37.1703
WBGene00001840	hel-1	protein_coding	II	8326852	8328870	3190.18	3011.13	4059.84	4071.09	3170.77	2677	4595.2	4935.07
WBGene00001841	hen-1	protein_coding	X	7116202	7116996	20.2551	9.8969	13.0157	12.7108	5.39247	9.29961	5.04745	2.85925
WBGene00001842	her-1	protein_coding	V	9697015	9702035	7.23398	3.71134	11.6876	14.5266	30.1978	13.7891	7.06643	2.85925
WBGene00001843	hgo-1	protein_coding	I	9049460	9055457	720.504	670.515	571.363	599.224	567.287	554.77	536.039	480.355
WBGene00001844	hid-1	protein_coding	X	2489048	2494339	279.232	445.36	330.971	330.481	313.841	337.351	177.67	228.74
WBGene00001851	hif-1	protein_coding	V	20780407	20785260	3307.37	3475.05	2600.22	2562.13	2522.6	3355.23	1416.31	1298.1
WBGene00001852	hil-1	protein_coding	V	14949777	14952799	270.551	158.35	65.6098	49.0274	144.518	168.034	23.2183	25.7333
WBGene00001853	hil-2	protein_coding	IV	6294240	6295217	930.29	1240.82	914.553	891.572	987.9	854.281	494.65	506.088
WBGene00001854	hil-3	protein_coding	X	8159169	8160084	1312.24	1378.14	710.552	800.781	901.62	837.927	95.9015	88.6369
WBGene00001855	hil-4	protein_coding	V	4754313	4755453	1574.11	1602.06	1830.7	1895.73	1475.38	1388.53	3701.8	3365.34
WBGene00001856	hil-5	protein_coding	I	5774585	5775610	2149.94	2025.15	2115.98	2102.73	1891.68	1713.37	4335.76	4148.78
WBGene00001857	hil-6	protein_coding	V	2030507	2031554	10.1276	11.134	5.31254	0	9.70644	9.94096	3.02847	0
WBGene00001858	hil-7	protein_coding	IV	6646312	6646972	423.911	1378.14	119.532	112.581	877.893	1096.71	5.04745	2.85925
WBGene00001859	hil-8	protein_coding	I	5463117	5469639	14.468	8.65979	10.0938	14.5266	7.54945	6.7342	18.1708	20.0148
WBGene00001860	him-1	protein_coding	I	4951571	4957667	2381.43	2135.26	2540.19	2356.95	1636.07	1995.89	4050.07	4151.64
WBGene00001862	him-3	protein_coding	IV	6977508	6978765	611.995	502.268	594.207	524.775	580.229	515.647	1079.14	1152.28
WBGene00001863	him-4	protein_coding	X	9717565	9753764	3230.69	3585.15	3690.09	3727.9	2450.34	3407.5	1555.62	1432.49
WBGene00001864	him-5	protein_coding	V	14090426	14092454	115.744	157.113	116.876	98.0548	190.893	122.498	222.088	223.022
WBGene00001865	him-6	protein_coding	IV	12490791	12495298	908.588	728.659	794.49	906.099	644.939	696.509	1622.25	1541.14
WBGene00001867	him-8	protein_coding	IV	10561905	10563974	374.72	279.587	266.955	252.4	315.998	270.651	475.47	534.68
WBGene00001869	him-10	protein_coding	III	5803260	5805112	581.612	515.876	555.16	562.907	509.049	472.356	1060.97	914.961
WBGene00001872	him-14	protein_coding	II	7065020	7069966	363.146	309.278	296.44	281.453	328.94	284.44	564.305	600.443
WBGene00001874	him-17	protein_coding	V	13176711	13180185	1320.92	1248.25	1477.95	1419.98	946.917	1148.34	2188.57	2181.61
WBGene00001875	his-1	protein_coding	V	16042520	16042831	1403.39	1754.23	1218.96	1283.79	2228.17	1166.62	1371.9	1361
WBGene00001876	his-2	protein_coding	V	16041873	16042283	1124.16	1437.52	1200.9	1134.89	1475.38	1122.69	1184.13	1175.15
WBGene00001877	his-3	protein_coding	V	16040808	16041191	1089.44	1358.35	1178.59	1165.76	1404.2	940.222	969.11	1000.74
WBGene00001878	his-4	protein_coding	V	16040144	16040515	894.12	1178.97	1027.18	1069.52	1267.23	919.058	1165.96	1203.75
WBGene00001879	his-5	protein_coding	V	8535214	8535525	617.782	702.68	716.661	739.042	994.371	565.031	578.437	566.132
WBGene00001880	his-6	protein_coding	V	8534567	8534977	885.439	1211.13	1226.4	1272.9	1221.93	886.349	963.053	1026.47
WBGene00001881	his-7	protein_coding	V	8533379	8533762	490.464	625.979	839.912	777.175	866.03	488.39	429.033	360.266
WBGene00001882	his-8	protein_coding	V	8532715	8533086	170.722	205.361	202.673	190.662	256.681	170.279	189.784	220.163
WBGene00001886	his-12	protein_coding	II	13821198	13821581	0	3.71134	1.32813	0	2.15699	1.92406	1.00949	2.85925
WBGene00001887	his-13	protein_coding	II	13820210	13820620	4.34039	6.18556	1.85939	3.63166	3.23548	1.2827	2.01898	0
WBGene00001889	his-15	protein_coding	II	13818371	13818739	1.4468	3.71134	1.32813	3.63166	4.31397	1.2827	0	0
WBGene00001890	his-16	protein_coding	II	13817760	13818143	1.4468	11.134	1.32813	0	1.07849	1.92406	1.00949	0
WBGene00001891	his-17	protein_coding	V	8897582	8897992	151.914	235.051	228.705	214.268	203.835	185.03	130.224	140.103
WBGene00001892	his-18	protein_coding	V	8898228	8898539	503.485	710.103	612.004	586.513	904.856	506.027	395.72	440.325
WBGene00001894	his-20	protein_coding	V	8895101	8895472	1.4468	0	0.796881	0	3.23548	0.962028	0	0
WBGene00001895	his-21	protein_coding	V	8891883	8892266	0	1.23711	1.32813	0	3.23548	2.88609	1.00949	0
WBGene00001898	his-24	protein_coding	X	14490094	14491119	2206.36	2818.14	1988.75	2059.15	2110.61	1670.08	252.372	251.614
WBGene00001899	his-25	protein_coding	II	13824849	13825259	0	0	2.12501	1.81583	1.07849	1.2827	0	0
WBGene00001901	his-27	protein_coding	V	8890038	8890448	1.4468	1.23711	4.25003	9.07914	2.15699	1.60338	2.01898	2.85925
WBGene00001905	his-31	protein_coding	IV	8333672	8333983	121.531	231.34	57.9067	59.9224	241.582	135.005	116.091	114.37
WBGene00001906	his-32	protein_coding	IV	8334305	8334715	542.548	1071.34	672.833	635.54	1316.84	751.024	363.416	391.718
WBGene00001909	his-35	protein_coding	V	9544659	9545288	539.655	685.36	592.348	635.54	526.305	517.571	280.638	288.785
WBGene00001910	C50F4.6	protein_coding	V	9546092	9546841	143.233	120	97.7507	85.344	183.344	104.22	111.044	114.37
WBGene00001911	his-37	protein_coding	V	9547105	9547607	723.398	732.371	408.268	428.536	797.006	661.876	276.6	205.866
WBGene00001912	his-38	protein_coding	X	7309564	7309875	497.698	432.989	378.253	394.035	854.167	364.929	662.225	566.132
WBGene00001914	his-40	protein_coding	X	7310110	7310520	525.187	527.01	413.847	406.746	750.631	505.065	713.709	689.08
WBGene00001915	his-41	protein_coding	V	9545536	9546264	445.613	481.237	418.097	472.116	358.06	452.795	209.974	171.555
WBGene00001916	his-42	protein_coding	II	13828287	13828697	1.4468	3.71134	0.531254	0	1.07849	1.92406	1.00949	0
WBGene00001918	his-44	protein_coding	II	13826730	13827098	0	0	0.796881	0	2.15699	1.2827	1.00949	0
WBGene00001919	his-45	protein_coding	IV	11326588	11326998	2.89359	2.47422	6.64067	5.44749	4.31397	5.45149	8.07592	14.2963
WBGene00001920	his-46	protein_coding	IV	11326018	11326329	0	2.47422	0.265627	3.63166	0	1.92406	4.03796	2.85925
WBGene00001921	his-47	protein_coding	IV	11324056	11324439	4.34039	1.23711	3.71878	0	2.15699	4.16879	7.06643	8.57776
WBGene00001922	his-48	protein_coding	IV	11324745	11325116	3441.93	3551.75	3047.27	3103.25	3886.89	3086.51	5997.38	6513.38
WBGene00001926	his-52	protein_coding	V	8850464	8850835	2.89359	1.23711	2.65627	1.81583	1.07849	0.320676	0	0
WBGene00001929	his-55	protein_coding	IV	11337853	11338263	4.34039	0	8.76569	0	8.62794	3.52744	13.1234	11.437
WBGene00001930	his-56	protein_coding	IV	11338522	11338833	8.68077	12.3711	2.9219	0	7.54945	7.37555	8.07592	11.437
WBGene00001931	his-57	protein_coding	IV	11340390	11341703	7.23398	7.42267	5.04691	9.07914	1.07849	2.56541	4.03796	8.57776
WBGene00001932	his-58	protein_coding	IV	11339735	11340106	11.5744	7.42267	3.45315	5.44749	10.7849	4.48947	9.0854	17.1555
WBGene00001933	his-59	protein_coding	IV	7488249	7488659	8062.99	7884.12	6663.25	6822.07	8042.32	6741.57	13207.2	12875.2
WBGene00001934	his-60	protein_coding	IV	7487681	7487992	3767.46	3995.87	1243.66	1231.13	3698.15	3313.23	5585.51	5369.68
WBGene00001935	his-61	protein_coding	IV	7485834	7486217	2760.49	2972.78	2794.93	2927.12	3519.12	2581.12	5527.96	5575.54
WBGene00001936	his-62	protein_coding	IV	7486545	7486916	6951.85	7263.09	5593.3	5600.02	7658.38	6132.29	11000.4	11394.1
WBGene00001937	his-63	protein_coding	IV	11406451	11406861	3784.82	3742.27	3048.87	2930.75	4391.62	3376.72	6876.64	6664.92
WBGene00001938	his-64	protein_coding	IV	11407116	11407427	5600.55	5742.68	1723.12	1877.57	6742.74	5135.63	8690.69	8303.27
WBGene00001939	his-65	protein_coding	IV	11401092	11401475	5.78718	7.42267	8.50006	7.26332	7.54945	4.81014	9.0854	8.57776
WBGene00001940	his-66	protein_coding	IV	11400415	11400786	4.34039	6.18556	9.82819	7.26332	9.70644	5.77217	6.05694	0
WBGene00001941	his-67	protein_coding	I	9988452	9988763	1811.39	1802.47	497.253	530.222	1720.2	1514.23	2432.87	2487.55
WBGene00001942	his-68	protein_coding	I	9989132	9989515	837.695	830.102	699.927	735.411	938.289	748.137	1575.81	1706.97
WBGene00001943	his-69	protein_coding	III	4058360	4058743	8.68077	4.94845	0.265627	0	1.07849	1.60338	3.02847	2.85925
WBGene00001944	his-70	protein_coding	III	4059715	4060119	1.4468	2.47422	2.12501	7.26332	3.23548	6.41352	3.02847	2.85925
WBGene00001945	his-71	protein_coding	X	7981382	7982070	471.655	595.051	360.456	357.718	428.162	491.597	109.025	85.7776
WBGene00001946	his-72	protein_coding	III	12367475	12369050	1456.92	1727.01	1535.85	1547.09	1457.04	1383.72	1649.51	1566.87
WBGene00001948	hlh-1	protein_coding	II	4518574	4522528	65.1058	137.319	74.6411	63.554	104.614	110.954	14.1329	14.2963
WBGene00001949	hlh-2	protein_coding	I	7190788	7193920	254.636	346.391	230.033	277.822	347.275	275.781	287.704	277.348
WBGene00001950	hlh-3	protein_coding	II	9086608	9087908	30.3827	75.4639	29.4846	38.1324	58.2386	42.9706	12.1139	20.0148
WBGene00001951	hlh-4	protein_coding	III	9737472	9739054	10.1276	4.94845	3.45315	10.895	5.39247	6.09285	2.01898	0
WBGene00001952	hlh-6	protein_coding	II	9613463	9614828	10.1276	29.6907	9.03131	1.81583	18.3344	14.7511	2.01898	0
WBGene00001953	hlh-8	protein_coding	X	8116457	8120351	13.0212	13.6082	5.04691	3.63166	7.54945	11.2237	6.05694	11.437
WBGene00001954	hlh-10	protein_coding	V	9280512	9282210	5.78718	11.134	3.45315	3.63166	5.39247	6.41352	2.01898	2.85925
WBGene00001955	hlh-11	protein_coding	III	9619711	9626529	1668.16	1546.39	1030.9	1035.02	909.17	1050.54	303.856	294.503
WBGene00001956	hlh-12	protein_coding	IV	8478595	8479446	2.89359	6.18556	3.18752	7.26332	2.15699	6.09285	1.00949	0
WBGene00001957	hlh-13	protein_coding	X	4249249	4250766	2.89359	6.18556	3.45315	0	10.7849	8.65826	0	0
WBGene00001958	hlh-14	protein_coding	II	5737785	5738895	8.68077	29.6907	8.23443	10.895	35.5903	23.4094	7.06643	11.437
WBGene00001959	hlh-15	protein_coding	X	2412953	2413377	2.89359	2.47422	0	1.81583	5.39247	3.52744	0	0
WBGene00001960	hlh-16	protein_coding	I	8766840	8768082	14.468	44.536	11.6876	19.9741	23.7268	28.2195	13.1234	8.57776
WBGene00001961	hlh-17	protein_coding	IV	16254764	16256274	2.89359	1.23711	2.39064	1.81583	3.23548	1.92406	0	2.85925
WBGene00001962	hlh-19	protein_coding	X	555792	557295	1.4468	3.71134	1.85939	1.81583	3.23548	5.13082	0	0
WBGene00001963	btb-1	pseudogene	III	185652	186922	21.7019	8.65979	7.17193	3.63166	12.9419	11.5443	24.2277	14.2963
WBGene00001965	hlh-26	protein_coding	II	5532839	5533742	0	0	0.265627	3.63166	1.07849	1.92406	0	0
WBGene00001971	hmg-1.1	protein_coding	II	14250695	14251450	4616.72	5964.12	4567.99	4514.15	4711.94	4851.83	5130.23	4869.31
WBGene00001972	hmg-1.2	protein_coding	III	6280380	6282438	875.311	1096.08	870.194	893.388	904.856	898.855	915.607	889.228
WBGene00001973	hmg-3	protein_coding	I	5815609	5818132	1503.22	1192.58	1243.4	1325.56	1242.42	1124.61	2330.91	2556.17
WBGene00001974	hmg-4	protein_coding	III	7379143	7381596	1420.75	1277.94	1386.57	1372.77	1356.74	1233.96	2310.72	2333.15
WBGene00001975	hmg-5	protein_coding	IV	7644895	7646219	486.123	351.34	368.159	330.481	469.144	388.018	635.978	591.865
WBGene00001977	hmg-12	protein_coding	II	11916513	11917643	1882.28	1676.29	2691.86	2602.08	1798.93	1604.34	4500.3	4371.8
WBGene00001978	hmp-1	protein_coding	V	11845871	11852166	1388.92	1524.12	1420.04	1461.74	1237.03	1404.56	1970.52	1829.92
WBGene00001979	hmp-2	protein_coding	I	14738882	14742671	986.715	1003.3	1049.76	1165.76	847.696	910.4	1455.68	1598.32
WBGene00001980	hmr-1	protein_coding	I	11075755	11134667	3321.84	5237.93	4809.97	4761.1	3147.04	4339.39	4697.15	4740.64
WBGene00001981	hnd-1	protein_coding	X	11684561	11685788	10.1276	21.0309	13.0157	19.9741	29.1193	16.6752	17.1613	22.874
WBGene00001983	hoe-1	protein_coding	IV	4739490	4744267	980.927	774.432	1127.32	1122.18	770.044	836.644	1750.45	1801.33
WBGene00001984	hog-1	protein_coding	X	5851953	5854263	21.7019	44.536	74.3755	92.6073	50.6892	56.439	7.06643	2.85925
WBGene00001985	hop-1	protein_coding	I	4208515	4210341	250.296	211.546	198.423	205.189	260.995	222.549	426.005	417.451
WBGene00001986	hot-1	protein_coding	V	14621135	14629472	102.722	116.289	65.3442	72.6332	88.4364	102.296	17.1613	17.1555
WBGene00001987	hot-2	protein_coding	V	19174759	19187911	57.8718	74.2267	56.3129	49.0274	67.9451	78.245	4.03796	2.85925
WBGene00001988	hot-3	protein_coding	II	13930527	13932044	39.0635	45.7732	24.7033	21.7899	29.1193	38.8018	2.01898	0
WBGene00001989	hot-4	protein_coding	III	6217416	6224444	47.7443	66.8041	40.3753	36.3166	57.1601	58.0424	9.0854	5.71851
WBGene00001990	hot-5	protein_coding	I	8683197	8687217	26.0423	24.7422	18.8595	9.07914	40.9827	38.8018	1.00949	0
WBGene00001991	hot-6	protein_coding	V	11021069	11022937	39.0635	38.3505	17.5314	21.7899	50.6892	53.8736	9.0854	5.71851
WBGene00001992	hot-7	protein_coding	II	14211418	14213315	10.1276	19.7938	13.2813	9.07914	29.1193	15.0718	3.02847	0
WBGene00001993	hpd-1	protein_coding	III	10535526	10537680	1769.43	1837.11	2158.22	2277.05	1107.61	1546.94	1823.14	1881.39
WBGene00001994	hpk-1	protein_coding	X	4210571	4217290	1841.77	2476.7	2322.64	2320.63	1406.35	1959.01	1216.43	1149.42
WBGene00001995	hpl-1	protein_coding	X	13245390	13247044	81.0205	89.0721	88.1881	61.7382	60.3956	57.0804	85.8066	68.6221
WBGene00001996	hpl-2	protein_coding	III	10752195	10755530	517.953	527.01	553.301	599.224	521.991	440.93	854.028	817.747
WBGene00001997	hpr-9	protein_coding	III	10621551	10626398	176.509	176.907	165.751	174.32	152.068	149.756	290.733	257.333
WBGene00001998	hpr-17	protein_coding	II	13153464	13157047	353.018	293.196	381.706	384.956	339.725	294.06	694.529	691.939
WBGene00001999	hrpa-1	protein_coding	IV	3336920	3338867	2699.72	2976.49	3801.12	3775.11	2342.49	2581.12	4670.91	4489.03
WBGene00002000	hrpr-1	protein_coding	I	12060271	12064897	2678.02	3042.06	3795.28	3885.87	2829.97	2396.73	3915.81	4005.81
WBGene00002001	hars-1	protein_coding	IV	10858957	10861284	1015.65	1102.27	1197.71	1116.73	890.835	910.72	1335.55	1323.83
WBGene00002002	hsb-1	protein_coding	IV	12566092	12567226	364.592	337.732	221.002	212.452	304.135	314.583	387.644	448.903
WBGene00002003	hse-5	protein_coding	III	4345334	4350079	600.42	457.732	614.661	690.015	503.656	506.989	925.702	1020.75
WBGene00002004	hsf-1	protein_coding	I	11953507	11963085	1063.39	966.185	1021.07	1020.5	857.402	893.724	1492.03	1483.95
WBGene00002005	hsp-1	protein_coding	IV	17278959	17281330	25444.8	22514.2	37575	38068.9	17894.4	21230.4	38276.8	39960.9
WBGene00002006	hsp-2	pseudogene	X	3293290	3294369	2.89359	6.18556	4.78128	12.7108	11.8634	8.0169	7.06643	17.1555
WBGene00002007	hsp-3	protein_coding	X	6089028	6092124	6093.9	7504.32	14568.6	14651.9	5184.32	5944.05	6443.57	6539.11
WBGene00002008	hsp-4	protein_coding	II	7350112	7352645	2854.53	2627.63	3829.81	3922.19	2579.76	2514.1	4937.41	4972.24
WBGene00002010	hsp-6	protein_coding	V	4824124	4826760	6160.46	5563.29	10073.9	10048.8	4409.96	5573.35	9106.6	8849.39
WBGene00002011	hsp-12.2	protein_coding	III	8138077	8139631	729.185	990.927	586.504	586.513	516.598	740.121	44.4175	80.0591
WBGene00002012	hsp-12.3	protein_coding	IV	9444791	9445507	83.9141	37.1134	14.0782	7.26332	43.1397	72.1521	16.1518	5.71851
WBGene00002013	hsp-12.6	protein_coding	IV	9446229	9447228	306.721	47.0103	28.4221	27.2374	60.3956	137.249	7.06643	0
WBGene00002016	hsp-16.2	protein_coding	V	1804334	1804957	286.466	238.763	25.2346	29.0533	277.173	270.009	10.0949	22.874
WBGene00002018	hsp-16.41	protein_coding	V	1805178	1805875	254.636	206.598	22.5783	14.5266	255.603	274.499	8.07592	5.71851
WBGene00002021	hsp-17	protein_coding	V	8384799	8385929	257.53	236.288	208.251	187.03	202.757	261.992	101.958	108.652
WBGene00002023	hsp-25	protein_coding	X	6034463	6039644	720.504	724.948	745.615	760.832	514.441	683.682	476.479	500.369
WBGene00002024	hsp-43	protein_coding	X	6233151	6235543	681.441	598.762	407.737	404.93	417.377	587.799	554.21	523.243
WBGene00002025	hsp-60	protein_coding	III	1619742	1625803	5505.06	5340.61	13245.5	13540.6	4277.3	5143.32	8766.41	9052.4
WBGene00002026	hsp-70	protein_coding	I	9320325	9322519	363.146	247.422	31.8752	56.2907	175.794	249.807	43.408	62.9036
WBGene00002027	hsr-9	protein_coding	I	9626241	9630848	3608.31	3249.89	3824.23	3738.79	2577.6	2897.31	6167.98	6396.15
WBGene00002028	hst-1	protein_coding	IV	8688276	8691513	530.974	552.989	600.317	573.802	468.066	493.521	1029.68	869.213
WBGene00002029	hst-2	protein_coding	X	11204103	11207155	89.7013	79.1752	109.704	88.9756	98.1429	80.8104	130.224	114.37
WBGene00002030	hst-3.1	protein_coding	II	6165653	6169256	33.2763	53.1958	30.5471	27.2374	32.3548	26.6161	5.04745	0
WBGene00002031	hst-6	protein_coding	X	5275561	5278519	63.659	63.0927	74.1099	67.1857	79.8085	60.9285	83.7876	71.4813
WBGene00002032	htp-1	protein_coding	IV	5390189	5391557	639.484	441.649	601.645	591.96	677.294	440.288	1079.14	1160.86
WBGene00002033	htp-2	protein_coding	IV	6419522	6420898	289.359	299.381	305.737	308.691	381.787	282.516	636.988	568.991
WBGene00002034	htp-3	protein_coding	I	4827072	4829791	860.843	654.432	931.288	927.889	643.86	642.635	1545.53	1604.04
WBGene00002035	hum-1	protein_coding	I	8845809	8851116	1268.84	1204.95	1332.65	1283.79	1121.63	1209.27	1869.57	1952.87
WBGene00002036	hum-2	protein_coding	V	9386175	9400063	2507.3	2520	3285.54	3244.89	1819.42	2325.22	4082.38	3931.47
WBGene00002037	hum-4	protein_coding	X	11420465	11433588	883.992	1872.99	1367.18	1381.85	1183.11	1589.91	325.056	328.814
WBGene00002038	hum-5	protein_coding	III	4029095	4036840	985.268	1150.51	1215.24	1153.05	889.757	1364.16	646.073	674.784
WBGene00002039	hum-6	protein_coding	X	2303082	2314914	710.377	1338.56	1302.1	1292.87	787.3	1162.77	144.357	120.089
WBGene00002040	hum-7	protein_coding	I	585807	607571	753.78	835.051	611.473	595.592	568.366	858.45	226.126	174.414
WBGene00002041	hum-8	protein_coding	IV	429209	440554	685.781	757.113	617.317	608.303	523.069	709.336	373.511	368.844
WBGene00002042	hus-1	protein_coding	I	3698102	3699300	232.934	155.876	140.251	136.187	225.405	153.604	266.505	288.785
WBGene00002043	hyl-1	protein_coding	IV	8539123	8544412	496.251	478.763	713.739	722.7	541.404	497.689	912.578	826.324
WBGene00002044	hyl-2	protein_coding	X	4696754	4699461	421.018	461.443	737.115	708.173	327.862	439.647	562.286	506.088
WBGene00002045	icd-1	protein_coding	II	6587577	6588655	8272.78	7512.98	9397.35	9389.65	6131.23	6702.77	8420.15	8720.72
WBGene00002046	icln-1	protein_coding	IV	9094552	9095653	525.187	460.206	457.675	470.3	408.749	396.035	616.798	737.687
WBGene00002047	icp-1	protein_coding	I	2304513	2306790	1103.9	1014.43	1437.31	1521.66	990.057	941.505	2293.56	2333.15
WBGene00002048	ida-1	protein_coding	III	5755539	5765816	2086.28	2057.32	1252.7	1205.71	1223.01	1883.01	226.126	177.274
WBGene00002050	ifa-1	protein_coding	X	11271182	11275498	1150.2	1353.4	1010.98	1098.58	720.433	1112.75	360.388	397.436
WBGene00002051	ifa-3	protein_coding	X	16267197	16270069	81.0205	357.525	43.0316	29.0533	204.914	200.743	4.03796	0
WBGene00002052	ifa-4	protein_coding	X	4912308	4915979	555.569	462.68	310.783	305.059	461.595	497.369	258.429	280.207
WBGene00002053	ifb-1	protein_coding	II	5765618	5772084	2504.4	2849.07	2749.24	2683.8	1712.65	2325.22	1237.63	1269.51
WBGene00002054	ifb-2	protein_coding	II	5750188	5754140	3861.5	4080	2527.17	2473.16	2784.67	3276.99	932.768	1003.6
WBGene00002055	ifc-1	protein_coding	V	2881393	2883753	1504.67	1391.75	900.475	900.651	878.972	1116.92	216.031	231.6
WBGene00002056	ifc-2	protein_coding	X	642156	654904	2864.66	2849.07	2361.69	2251.63	2112.77	2580.48	1383	1372.44
WBGene00002057	ifd-1	protein_coding	X	8820703	8824448	442.719	522.061	382.503	366.797	326.783	469.47	83.7876	62.9036
WBGene00002058	ifd-2	protein_coding	X	813854	815929	198.211	210.309	256.33	246.953	204.914	246.921	138.3	120.089
WBGene00002059	ife-1	protein_coding	III	13343417	13344618	1278.97	1093.61	1303.96	1263.82	1254.29	953.37	1751.46	1781.31
WBGene00002060	ife-2	protein_coding	X	381385	382709	283.572	326.598	451.831	404.93	296.586	262.313	231.173	228.74
WBGene00002061	ife-3	protein_coding	V	6584	7828	2083.39	1781.44	2038.15	2001.04	1781.67	1604.34	3253.58	3505.44
WBGene00002062	ife-4	protein_coding	X	1104212	1106251	60.7654	123.711	91.9069	99.8706	91.6719	88.1859	63.5978	54.3258
WBGene00002063	ife-5	protein_coding	II	12280660	12284139	52.0846	48.2474	59.2348	81.7123	46.3752	41.3672	92.873	51.4666
WBGene00002064	iff-1	protein_coding	III	9745862	9747193	3282.78	2564.53	2382.41	2413.24	3037.04	2502.56	4614.38	4995.12
WBGene00002065	iff-2	protein_coding	II	8559375	8561367	4087.2	4177.73	6823.69	6743.99	2799.77	3621.4	1759.54	1741.29
WBGene00002066	ifg-1	protein_coding	II	8217222	8222396	6199.52	5913.4	8299.78	7986.02	4744.29	5660.25	9453.87	9472.71
WBGene00002067	ifp-1	protein_coding	X	9675873	9680169	836.248	972.37	884.006	878.861	729.061	982.552	85.8066	85.7776
WBGene00002068	ify-1	protein_coding	II	5054135	5055179	1109.69	909.278	1152.02	1143.97	982.507	916.492	2093.68	2210.2
WBGene00002069	ikb-1	protein_coding	I	9685398	9688653	321.189	314.227	125.376	116.213	253.446	252.051	41.3891	22.874
WBGene00002070	ile-1	protein_coding	I	9609544	9611534	1206.63	1274.23	1737.73	1726.85	1024.57	1146.42	2005.86	2138.72
WBGene00002071	ile-2	protein_coding	X	768596	770776	342.891	361.237	608.02	626.461	406.592	321.638	408.843	397.436
WBGene00002072	ima-1	protein_coding	V	11239675	11241792	1232.67	1020.62	1023.73	964.205	1013.78	983.834	1862.51	1987.18
WBGene00002073	ima-2	protein_coding	I	6315233	6317262	3643.03	2955.46	4442.87	4363.44	3028.41	2995.44	6871.59	6873.65
WBGene00002074	ima-3	protein_coding	IV	7558726	7561664	3634.35	3300.62	4240.2	4107.41	2522.6	3188.16	4434.69	4417.55
WBGene00002075	imb-1	protein_coding	I	4920683	4926486	1717.35	1557.52	2235.52	2258.89	1399.88	1462.28	3041.59	3185.21
WBGene00002076	imb-2	protein_coding	II	14365701	14373901	1763.64	1740.62	2386.39	2329.71	1528.22	1566.5	3212.2	3093.71
WBGene00002077	imb-3	protein_coding	I	310981	314989	7258.57	6533.19	11118.3	10936.7	4338.78	5532.95	11976.6	12246.2
WBGene00002078	xpo-1	protein_coding	V	7805064	7814656	6266.07	5661.03	5717.62	5509.23	4220.14	4879.73	8025.44	8220.35
WBGene00002079	xpo-2	protein_coding	I	318549	323352	1928.58	1689.9	2842.47	2867.19	1934.82	1760.19	4275.19	4477.59
WBGene00002080	xpo-3	protein_coding	IV	7916689	7924032	1456.92	1182.68	1376.74	1419.98	1054.77	1130.38	2011.91	2024.35
WBGene00002081	ina-1	protein_coding	III	9168073	9172802	629.356	844.948	734.193	773.543	727.983	706.129	602.665	580.428
WBGene00002083	inf-1	protein_coding	III	6930134	6931953	4544.38	3978.55	6307.04	6335.43	3225.77	3704.77	6764.59	6873.65
WBGene00002084	ins-1	protein_coding	IV	10436701	10438412	50.6378	89.0721	39.5784	34.5008	40.9827	57.0804	5.04745	2.85925
WBGene00002085	ins-2	protein_coding	II	5988524	5989426	7.23398	11.134	0.796881	0	18.3344	9.29961	1.00949	0
WBGene00002086	ins-3	protein_coding	II	5990099	5990768	31.8295	22.268	6.9063	0	23.7268	13.4684	3.02847	0
WBGene00002087	ins-4	protein_coding	II	5996366	5997008	15.9148	19.7938	13.0157	12.7108	10.7849	11.865	10.0949	5.71851
WBGene00002088	ins-5	protein_coding	II	5997557	5999023	8.68077	4.94845	31.344	19.9741	3.23548	4.48947	4.03796	5.71851
WBGene00002089	ins-6	protein_coding	II	6000436	6001009	14.468	13.6082	13.8126	18.1583	19.4129	9.62028	5.04745	2.85925
WBGene00002090	ins-7	protein_coding	IV	9682011	9682845	10.1276	14.8453	5.04691	0	29.1193	13.4684	8.07592	11.437
WBGene00002092	ins-9	protein_coding	X	8866099	8866663	0	0	5.57816	7.26332	0	0.641352	1.00949	0
WBGene00002093	ins-10	protein_coding	V	14033949	14034396	11.5744	7.42267	3.18752	3.63166	18.3344	9.62028	2.01898	8.57776
WBGene00002094	ins-11	protein_coding	II	5556731	5557173	4.34039	1.23711	3.9844	1.81583	7.54945	4.16879	1.00949	0
WBGene00002095	ins-12	protein_coding	II	5554617	5555361	2.89359	3.71134	9.29694	5.44749	4.31397	1.2827	7.06643	5.71851
WBGene00002097	ins-14	protein_coding	II	6745435	6745814	5.78718	4.94845	3.9844	5.44749	5.39247	4.48947	0	0
WBGene00002100	ins-17	protein_coding	III	4476918	4477572	130.212	117.526	70.1255	74.449	85.201	94.9201	36.3416	20.0148
WBGene00002101	ins-18	protein_coding	I	8147427	8149651	37.6167	44.536	26.2971	29.0533	36.6688	43.9326	6.05694	2.85925
WBGene00002102	ins-19	protein_coding	II	3126037	3126441	0	2.47422	0	0	1.07849	3.20676	0	0
WBGene00002105	ins-22	protein_coding	III	10026289	10026686	4.34039	8.65979	6.9063	12.7108	6.47096	7.37555	1.00949	0
WBGene00002106	ins-23	protein_coding	III	10028247	10028697	15.9148	8.65979	2.39064	3.63166	12.9419	11.2237	1.00949	0
WBGene00002107	ins-24	protein_coding	I	14031147	14031667	27.4891	21.0309	17.5314	16.3425	17.2559	25.3334	3.02847	2.85925
WBGene00002108	ins-25	protein_coding	I	14020361	14021312	5.78718	3.71134	2.65627	1.81583	0	2.24473	0	0
WBGene00002109	ins-26	protein_coding	I	14037151	14037777	13.0212	13.6082	22.047	18.1583	7.54945	7.05488	4.03796	0
WBGene00002110	ins-27	protein_coding	I	14027236	14027588	21.7019	28.4536	58.1723	65.3698	24.8053	23.4094	16.1518	14.2963
WBGene00002111	ins-28	protein_coding	I	14012369	14013629	23.1487	4.94845	6.64067	1.81583	6.47096	12.5064	3.02847	2.85925
WBGene00002112	ins-29	protein_coding	I	14018799	14019759	14.468	2.47422	7.70318	10.895	5.39247	3.52744	2.01898	0
WBGene00002113	ins-30	protein_coding	I	14034954	14036057	67.9994	71.7525	109.438	121.661	26.9623	49.0635	6.05694	20.0148
WBGene00002114	ins-31	protein_coding	II	3127041	3127831	4.34039	6.18556	25.2346	23.6058	63.6311	74.7175	17.1613	5.71851
WBGene00002116	ins-33	protein_coding	I	13637845	13639311	4.34039	0	18.3283	9.07914	2.15699	2.24473	1.00949	2.85925
WBGene00002117	ins-34	protein_coding	IV	14106574	14107737	21.7019	43.2989	6.9063	3.63166	44.2182	38.1605	16.1518	14.2963
WBGene00002118	ins-35	protein_coding	V	20375536	20376302	10.1276	8.65979	31.8752	54.4749	4.31397	9.29961	1.00949	2.85925
WBGene00002119	ins-36	protein_coding	I	11212307	11215094	2.89359	1.23711	1.32813	0	3.23548	4.16879	0	0
WBGene00002120	ins-37	protein_coding	II	13835101	13836107	4.34039	2.47422	4.78128	7.26332	9.70644	9.94096	7.06643	2.85925
WBGene00002123	inx-1	protein_coding	X	6943735	6956399	457.187	698.969	508.941	490.274	479.929	675.985	38.3606	34.311
WBGene00002124	inx-2	protein_coding	X	11295007	11296733	241.615	347.629	158.314	147.082	401.199	263.916	279.629	257.333
WBGene00002125	inx-3	protein_coding	X	5996156	5998243	526.634	856.082	463.784	493.905	933.975	621.791	678.377	606.162
WBGene00002127	inx-5	protein_coding	X	8300027	8302399	412.337	613.608	590.489	537.485	395.807	434.837	136.281	137.244
WBGene00002128	inx-6	protein_coding	IV	12746584	12749721	332.763	305.567	176.642	156.161	229.719	271.292	8.07592	2.85925
WBGene00002129	inx-7	protein_coding	IV	5943981	5946638	269.104	277.113	207.455	190.662	224.327	254.938	405.815	417.451
WBGene00002130	inx-8	protein_coding	IV	11673843	11675635	523.74	420.618	341.331	357.718	486.4	453.115	613.77	594.725
WBGene00002131	inx-9	protein_coding	IV	11676354	11678497	75.2334	101.443	70.6567	81.7123	99.2214	93.6374	180.699	157.259
WBGene00002132	inx-10	protein_coding	V	9204661	9207477	138.892	212.783	115.548	99.8706	102.457	177.013	47.446	45.7481
WBGene00002133	inx-11	protein_coding	V	12487234	12493269	130.212	133.608	85.5318	108.95	127.262	132.439	104.987	154.4
WBGene00002134	inx-12	protein_coding	I	3755488	3759039	853.609	885.773	1022.66	1027.76	766.809	750.703	293.761	248.755
WBGene00002135	inx-13	protein_coding	I	3748523	3753958	745.1	983.504	963.163	938.784	633.075	788.222	246.315	245.896
WBGene00002136	inx-14	protein_coding	I	7350309	7352235	745.1	559.175	720.911	748.122	734.454	655.783	1347.67	1358.15
WBGene00002137	inx-15	protein_coding	I	4159014	4161113	274.891	467.629	370.284	368.613	457.281	416.879	204.926	154.4
WBGene00002138	inx-16	protein_coding	I	4162035	4165025	410.89	502.268	454.488	430.351	506.892	442.854	226.126	254.474
WBGene00002139	inx-17	protein_coding	I	4165075	4167056	153.36	200.412	162.298	199.741	193.05	198.178	86.8161	88.6369
WBGene00002140	inx-18	protein_coding	IV	606355	614062	88.2545	118.763	72.2505	76.2648	75.4945	126.346	9.0854	0
WBGene00002141	inx-19	protein_coding	I	2451898	2464618	31.8295	59.3814	18.3283	10.895	36.6688	64.1352	4.03796	11.437
WBGene00002142	inx-20	protein_coding	I	9874698	9879218	13.0212	39.5876	15.4064	19.9741	25.8838	37.5191	1.00949	0
WBGene00002143	inx-21	protein_coding	I	3611942	3618317	318.295	261.031	270.674	274.19	307.371	248.524	500.707	537.54
WBGene00002144	inx-22	protein_coding	I	3608518	3611844	694.462	536.907	650.255	722.7	548.953	561.183	1214.42	1223.76
WBGene00002146	ipp-5	protein_coding	X	6031469	6034515	283.572	280.825	241.986	257.848	259.917	295.343	109.025	114.37
WBGene00002147	ire-1	protein_coding	II	8112243	8124910	1234.12	1037.94	1261.73	1291.05	1077.41	1130.7	2039.17	1858.51
WBGene00002148	gon-14	protein_coding	V	6606433	6611158	1474.28	1264.33	1507.7	1459.93	1064.47	1190.03	2556.03	2484.69
WBGene00002149	irk-1	protein_coding	X	6765970	6778114	36.1699	49.4845	52.0629	50.8432	28.0408	43.2913	10.0949	8.57776
WBGene00002150	irk-2	protein_coding	X	702971	714498	50.6378	38.3505	34.5315	36.3166	33.4333	38.4811	11.1044	5.71851
WBGene00002151	irk-3	protein_coding	X	14353290	14370414	83.9141	95.2577	73.0474	67.1857	79.8085	71.8315	19.1803	34.311
WBGene00002152	iars-1	protein_coding	IV	10368601	10373136	2708.4	2437.11	3857.96	3853.19	2316.6	2266.54	3668.48	4048.7
WBGene00002153	iars-2	protein_coding	I	10180236	10184599	771.142	616.082	976.444	1000.52	601.799	627.884	1266.91	1160.86
WBGene00002162	isp-1	protein_coding	IV	8134016	8136055	2838.61	2674.64	3330.96	3313.89	2081.49	2698.49	2397.54	2556.17
WBGene00002163	ist-1	protein_coding	X	7126648	7139666	383.401	385.979	286.346	310.507	189.815	329.655	49.465	40.0296
WBGene00002169	isw-1	protein_coding	III	6703988	6710100	2128.24	1766.6	2335.66	2391.45	1792.46	1789.69	3686.66	3611.24
WBGene00002173	itr-1	protein_coding	IV	7675174	7696930	2272.92	2079.59	2084.11	2071.86	1459.2	2356.01	1371.9	1289.52
WBGene00002174	itx-1	protein_coding	I	2802803	2815830	999.736	1266.8	1295.99	1294.69	946.917	1186.5	512.821	426.029
WBGene00002175	jac-1	protein_coding	IV	15997835	16026847	721.951	1000.82	766.333	691.831	691.314	894.686	392.691	491.792
WBGene00002176	jip-1	protein_coding	II	1326989	1350132	267.657	384.742	215.689	226.979	197.364	324.524	56.5314	65.7628
WBGene00002177	jkk-1	protein_coding	X	5368468	5374174	37.6167	72.9896	49.9378	32.6849	45.2967	55.477	9.0854	22.874
WBGene00002178	jnk-1	protein_coding	IV	6957641	6963719	151.914	189.278	122.454	87.1598	150.989	196.574	15.1423	5.71851
WBGene00002179	jph-1	protein_coding	I	7946193	7951593	1006.97	1276.7	1034.62	1073.15	695.628	1079.72	162.528	134.385
WBGene00002180	jtr-1	protein_coding	IV	1420929	1421790	202.551	181.856	173.189	185.215	226.484	162.583	251.363	245.896
WBGene00002181	kal-1	protein_coding	I	14128591	14142207	228.594	420.618	222.861	210.636	314.92	310.415	59.5599	85.7776
WBGene00002182	kap-1	protein_coding	III	7338835	7343667	67.9994	100.206	45.6878	58.1065	87.3579	101.975	25.2372	20.0148
WBGene00002183	kat-1	protein_coding	II	7073814	7075511	1352.75	1359.59	2448.55	2453.18	1137.81	1534.44	3123.36	3242.39
WBGene00002184	kel-1	protein_coding	II	11688943	11696059	82.4673	168.247	65.8755	81.7123	105.692	96.2028	34.3226	40.0296
WBGene00002185	kel-3	protein_coding	III	13464820	13471350	515.059	454.02	377.987	364.982	451.889	415.596	524.935	543.258
WBGene00002186	kel-10	protein_coding	III	10098469	10101452	14.468	6.18556	15.672	14.5266	17.2559	31.4263	54.5124	91.4961
WBGene00002187	kgb-1	protein_coding	IV	405621	410035	431.145	533.195	436.691	475.747	515.52	534.567	204.926	180.133
WBGene00002188	kgb-2	protein_coding	IV	3606784	3609229	43.4039	59.3814	11.422	16.3425	73.3375	68.6247	6.05694	2.85925
WBGene00002189	kin-1	protein_coding	I	14913766	14952226	1954.62	2015.26	1782.36	1646.96	1275.86	1943.62	419.948	426.029
WBGene00002190	kin-2	protein_coding	X	5970647	5977854	2682.36	2987.63	2566.22	2698.32	1834.52	2770.64	945.892	914.961
WBGene00002191	kin-3	protein_coding	I	10734022	10736615	2636.06	2258.97	2207.62	2277.05	1990.9	2162.96	2261.26	2024.35
WBGene00002192	kin-4	protein_coding	IV	11425742	11447067	2588.32	2444.53	2758	2683.8	1973.64	2468.57	4110.64	4034.41
WBGene00002193	kin-5	protein_coding	IV	9967077	9969181	2.89359	1.23711	8.23443	10.895	8.62794	15.3925	28.2657	22.874
WBGene00002195	kin-9	protein_coding	X	8432661	8437350	91.1481	80.4123	46.4847	65.3698	40.9827	53.5529	11.1044	5.71851
WBGene00002196	kin-10	protein_coding	I	8288949	8291005	1441.01	1333.61	1417.92	1430.87	1284.49	1325.35	1834.24	1844.22
WBGene00002198	kin-14	protein_coding	I	7075918	7079575	46.2975	47.0103	31.6096	29.0533	53.9247	47.1394	40.3796	25.7333
WBGene00002199	kin-15	protein_coding	II	9431383	9433709	57.8718	58.1443	50.4691	36.3166	40.9827	45.2153	45.427	34.311
WBGene00002200	kin-16	protein_coding	II	9434021	9436109	99.8289	87.835	58.9692	52.659	70.102	81.4517	40.3796	42.8888
WBGene00002201	kin-18	protein_coding	III	6118620	6124067	2081.94	1854.43	1940.14	2024.65	1586.46	1783.6	3245.51	3213.8
WBGene00002202	kin-19	protein_coding	III	4083994	4086636	3230.69	3303.09	3043.55	2957.99	2587.3	2778.66	3547.35	3210.94
WBGene00002203	kin-20	protein_coding	X	15268602	15277764	908.588	1421.44	1738.79	1674.19	1011.63	1231.4	533.01	483.214
WBGene00002204	kin-21	protein_coding	IV	9832886	9834870	0	0	0.531254	7.26332	2.15699	5.77217	5.04745	8.57776
WBGene00002205	kin-23	pseudogene	I	11640687	11642206	23.1487	7.42267	7.96881	3.63166	6.47096	6.09285	0	2.85925
WBGene00002206	kin-24	protein_coding	IV	9839057	9841084	2.89359	1.23711	5.31254	5.44749	2.15699	6.7342	14.1329	20.0148
WBGene00002207	sid-3	protein_coding	X	17186380	17193292	577.271	814.02	848.412	740.858	544.639	741.083	668.282	657.628
WBGene00002208	kin-26	protein_coding	IV	7875725	7877881	1.4468	0	1.59376	3.63166	3.23548	2.56541	10.0949	2.85925
WBGene00002210	kin-29	protein_coding	X	2843922	2852438	727.738	728.659	720.114	662.778	540.325	710.618	258.429	248.755
WBGene00002211	kin-30	protein_coding	V	15244756	15247786	21.7019	11.134	10.6251	7.26332	16.1774	13.7891	6.05694	0
WBGene00002212	kin-31	pseudogene	III	8671772	8673626	17.3615	8.65979	9.29694	9.07914	7.54945	8.97893	20.1898	17.1555
WBGene00002213	kin-32	protein_coding	I	5086310	5093903	228.594	262.268	229.502	259.664	234.033	282.195	124.167	142.963
WBGene00002214	klc-1	protein_coding	IV	11083735	11086050	985.268	868.453	880.287	951.494	794.849	725.69	1574.8	1661.23
WBGene00002215	klc-2	protein_coding	V	5576472	5581412	578.718	854.845	695.677	715.437	620.134	687.53	341.207	383.14
WBGene00002216	klp-3	protein_coding	II	7842353	7845653	261.87	282.062	224.455	190.662	222.17	258.786	77.7307	94.3554
WBGene00002217	klp-4	protein_coding	X	3171420	3178701	1213.86	1229.69	1094.38	1091.31	699.942	1072.98	325.056	260.192
WBGene00002218	klp-6	protein_coding	III	5030929	5036583	17.3615	29.6907	10.6251	9.07914	23.7268	25.9748	6.05694	0
WBGene00002219	klp-7	protein_coding	III	10805925	10811001	1223.99	1258.14	1867.62	2068.23	1080.65	1156.36	2641.83	2787.77
WBGene00002220	gcc-1	protein_coding	X	3159940	3164424	177.956	170.722	232.423	228.794	156.381	180.861	144.357	137.244
WBGene00002221	klp-10	pseudogene	IV	7797192	7800252	590.293	514.639	686.114	706.357	545.717	516.289	1160.91	1192.31
WBGene00002222	klp-11	protein_coding	IV	8756735	8762066	7.23398	11.134	2.12501	1.81583	5.39247	8.33758	1.00949	0
WBGene00002223	klp-12	protein_coding	IV	11341325	11359869	1689.86	1682.47	1783.15	1775.88	1176.64	1642.82	2116.9	2127.28
WBGene00002224	klp-13	protein_coding	X	5984989	5992151	49.191	44.536	40.1097	32.6849	38.8258	60.2871	12.1139	5.71851
WBGene00002225	klp-15	protein_coding	I	5577070	5579194	982.374	957.525	1182.57	1265.63	828.283	826.703	2312.74	2504.71
WBGene00002226	klp-16	protein_coding	I	9512452	9514637	1009.86	999.587	1280.59	1320.11	882.207	873.843	2471.23	2341.73
WBGene00002227	klp-17	protein_coding	II	11465940	11467641	26.0423	19.7938	27.8908	23.6058	19.4129	39.1225	30.2847	28.5925
WBGene00002228	klp-18	protein_coding	IV	7040211	7043694	1533.6	1289.07	1591.37	1596.11	1101.14	1141.29	3019.38	3085.13
WBGene00002229	klp-19	protein_coding	III	13302717	13307259	2974.61	2643.71	3612.53	3533.6	2132.18	2382.62	6272.97	6216.02
WBGene00002230	klp-20	protein_coding	III	209992	230450	151.914	305.567	215.689	194.294	191.972	226.718	205.936	168.696
WBGene00002231	knl-1	protein_coding	III	8250632	8253943	1414.97	1270.51	1557.1	1492.61	1215.46	1155.08	2452.05	2510.42
WBGene00002232	kpc-1	protein_coding	I	11675941	11680975	882.545	1049.07	521.691	550.196	998.685	962.349	145.366	168.696
WBGene00002233	kqt-1	protein_coding	X	6619012	6627995	75.2334	106.392	81.8131	85.344	117.556	119.612	20.1898	8.57776
WBGene00002234	kqt-2	protein_coding	X	8243131	8246369	227.147	216.495	206.392	197.925	162.852	199.781	118.11	88.6369
WBGene00002235	kqt-3	protein_coding	II	13696282	13712931	112.85	118.763	105.985	107.134	125.105	111.275	53.5029	54.3258
WBGene00002238	kars-1	protein_coding	II	7070183	7072415	3239.38	2797.11	4028.5	3965.77	2673.58	2751.08	5409.85	5466.89
WBGene00002239	ksr-1	protein_coding	X	8275169	8283301	238.721	267.216	251.283	257.848	202.757	223.832	108.015	142.963
WBGene00002240	ksr-2	protein_coding	I	12047342	12059798	474.549	430.515	464.05	404.93	379.63	400.204	839.895	800.591
WBGene00002241	kup-1	protein_coding	V	12032258	12040873	795.738	682.886	737.911	704.542	661.116	606.078	1264.89	1229.48
WBGene00002242	kvs-1	protein_coding	X	7690498	7707131	56.425	69.2783	45.4222	50.8432	33.4333	42.3293	7.06643	8.57776
WBGene00002243	lad-2	protein_coding	IV	2964334	2978484	208.339	387.216	232.423	207.005	268.545	320.676	12.1139	11.437
WBGene00002244	laf-1	protein_coding	III	2769356	2779053	2232.41	2277.52	3297.23	3170.44	1508.81	1927.91	3344.44	3614.1
WBGene00002245	lag-1	protein_coding	IV	6095407	6110655	1040.25	945.154	1094.91	1113.1	781.907	979.666	1700.99	1581.17
WBGene00002246	lag-2	protein_coding	V	3188343	3190115	30.3827	17.3196	54.4535	58.1065	20.4914	20.5233	5.04745	11.437
WBGene00002247	lam-1	protein_coding	IV	5173332	5183746	2087.73	3204.12	2991.22	2959.8	2180.71	2347.67	1656.57	1718.41
WBGene00002248	lam-3	protein_coding	I	10608466	10621435	578.718	1818.56	404.815	395.851	1063.39	1129.1	223.097	260.192
WBGene00002249	lap-1	protein_coding	III	8399168	8401928	1170.46	1098.56	1281.12	1265.63	874.658	951.767	1731.27	1789.89
WBGene00002250	lap-2	protein_coding	V	13043712	13046154	2605.68	2510.1	2997.6	2907.14	2242.19	2602.61	4134.87	4148.78
WBGene00002251	lat-1	protein_coding	II	8896841	8908634	2326.45	2299.79	2318.92	2151.76	1969.33	2233.83	3567.54	3594.08
WBGene00002252	lat-2	protein_coding	II	4359065	4368281	120.084	145.979	163.626	167.056	67.9451	160.017	16.1518	8.57776
WBGene00002253	lbp-1	protein_coding	X	3259142	3259812	753.78	810.309	144.235	148.898	809.948	556.694	145.366	177.274
WBGene00002254	lbp-2	protein_coding	X	3260610	3261470	1199.39	1028.04	1038.6	1142.16	1646.86	1063.68	1411.27	1298.1
WBGene00002255	lbp-3	protein_coding	X	3257372	3258155	209.785	293.196	318.221	354.087	363.452	315.545	255.401	231.6
WBGene00002256	lbp-4	protein_coding	V	7820578	7821477	247.402	199.175	263.236	268.743	276.094	194.971	294.771	280.207
WBGene00002257	lbp-5	protein_coding	I	6731267	6732276	203.998	227.629	163.095	145.266	311.684	223.191	128.205	125.807
WBGene00002258	lbp-6	protein_coding	I	6728296	6729376	1351.31	1296.49	2032.05	2070.05	1223.01	1533.47	1903.9	1775.6
WBGene00002259	lbp-7	protein_coding	V	13879552	13880213	146.126	178.144	134.938	141.635	181.187	118.33	76.7212	71.4813
WBGene00002260	lbp-8	protein_coding	V	13890773	13891364	4.34039	6.18556	507.082	528.406	1.07849	4.81014	271.553	268.77
WBGene00002261	ldb-1	protein_coding	X	11028917	11040612	743.653	1119.59	713.474	700.91	713.962	912.644	230.164	243.037
WBGene00002262	ldh-1	protein_coding	II	11724204	11726533	716.164	795.463	1016.02	1116.73	738.768	884.746	674.339	677.643
WBGene00002263	lea-1	protein_coding	V	10011923	10028168	6047.61	5630.1	6288.45	6097.55	6319.97	5480.68	5752.07	5461.17
WBGene00002264	lec-1	protein_coding	II	13195549	13199713	4090.09	4588.45	5072.41	4875.5	3342.25	4257.94	3389.87	3465.42
WBGene00002265	lec-2	protein_coding	II	10009608	10016183	15084.3	11429.7	3212.49	3319.34	6564.79	13619.1	1826.17	1832.78
WBGene00002266	lec-3	protein_coding	II	9991112	10000351	1210.97	1411.55	881.881	955.126	1021.33	1487.94	184.737	228.74
WBGene00002267	lec-4	protein_coding	III	3771425	3773326	341.444	278.35	482.113	437.615	336.49	284.76	250.353	265.911
WBGene00002268	lec-5	protein_coding	II	5839639	5841103	1406.29	1461.03	1143.52	1173.03	1485.08	1708.88	852.009	774.858
WBGene00002269	lec-6	protein_coding	III	599510	600366	1346.97	1099.79	1434.39	1401.82	2013.55	1206.7	1724.21	1706.97
WBGene00002270	lec-7	protein_coding	X	9852041	9853002	15.9148	30.9278	9.82819	7.26332	17.2559	16.9958	3.02847	5.71851
WBGene00002271	lec-8	protein_coding	X	9850571	9851336	1127.05	927.834	642.817	719.068	1716.96	1220.81	1008.48	940.694
WBGene00002272	lec-9	protein_coding	X	17600487	17601503	1422.2	1268.04	797.146	853.44	1225.17	1305.47	596.608	574.71
WBGene00002273	lec-10	protein_coding	V	6488203	6489120	1441.01	1099.79	1970.42	1979.25	1061.24	1172.39	1217.44	1195.17
WBGene00002274	lec-11	protein_coding	IV	6588184	6590154	163.488	170.722	104.923	103.502	101.378	101.334	74.7022	62.9036
WBGene00002275	lem-2	protein_coding	II	14063450	14066646	1960.41	1767.83	2545.24	2542.16	1901.38	1671.04	4199.48	3985.8
WBGene00002276	lem-3	protein_coding	I	9578526	9581267	662.632	621.03	678.411	640.988	579.151	576.255	1424.39	1329.55
WBGene00002278	lep-2	protein_coding	IV	992283	997644	528.08	513.402	558.879	528.406	504.735	467.867	906.522	914.961
WBGene00002280	let-2	protein_coding	X	16380597	16389340	11668.4	16704.7	20581.8	20629.6	11107.4	14513.2	7357.16	7496.96
WBGene00002282	let-4	protein_coding	X	14577935	14580923	133.105	257.319	409.862	383.14	134.812	199.461	28.2657	20.0148
WBGene00002285	let-7	miRNA	X	14743590	14745321	10.1276	4.94845	108.11	98.0548	1.07849	4.81014	0	0
WBGene00002295	let-19	protein_coding	II	8770975	8782020	2631.72	3100.2	2770.75	2834.51	1645.78	2672.19	1508.18	1481.09
WBGene00002297	ect-2	protein_coding	II	10778387	10783962	1397.6	1148.04	1543.56	1447.22	1020.25	1197.08	2691.3	2782.05
WBGene00002299	let-23	protein_coding	II	9197512	9207213	460.081	473.814	271.736	256.032	362.374	420.406	168.585	177.274
WBGene00002324	let-49	protein_coding	I	14820405	14821651	225.7	227.629	252.346	266.927	187.658	185.992	369.473	446.044
WBGene00002335	let-60	protein_coding	IV	11688227	11691088	808.759	878.35	911.366	838.913	748.474	793.673	818.696	757.702
WBGene00002344	let-70	protein_coding	IV	11081086	11082253	4840.98	4760.41	4588.97	4525.05	4195.34	4444.25	5784.37	5415.43
WBGene00002348	myo-1	protein_coding	I	7258946	7267057	10395.2	9998.34	7777.82	7337.76	4003.37	7009.02	533.01	466.058
WBGene00002363	let-92	protein_coding	IV	11858442	11860460	2557.93	2383.92	2697.97	2783.67	2364.06	2299.89	3188.98	3136.6
WBGene00002368	let-99	protein_coding	IV	12567842	12570622	959.225	755.876	1016.02	969.653	615.82	768.661	1930.14	2107.27
WBGene00002393	lpr-1	protein_coding	I	557375	561671	20.2551	38.3505	75.1724	65.3698	39.9042	37.8398	3.02847	2.85925
WBGene00002497	let-268	protein_coding	II	10033266	10039980	127.318	304.33	298.565	285.085	183.344	201.064	100.949	125.807
WBGene00002583	let-363	protein_coding	I	5245743	5263424	3907.79	3908.04	4011.76	3933.09	2754.47	3540.91	4973.75	4754.94
WBGene00002601	let-381	protein_coding	I	6320289	6324019	31.8295	45.7732	13.8126	12.7108	45.2967	38.4811	3.02847	0
WBGene00002632	let-413	protein_coding	V	7973078	7977776	616.335	789.278	619.176	622.829	524.148	621.47	479.507	406.014
WBGene00002637	let-418	protein_coding	V	5826833	5832831	3686.44	3712.57	4738.78	4748.39	3185.87	3434.12	5575.41	5747.1
WBGene00002694	let-502	protein_coding	I	4738171	4744321	2128.24	2258.97	2052.23	1939.31	1863.64	2061.31	3145.57	3059.4
WBGene00002696	let-504	protein_coding	I	4129565	4132224	815.993	666.804	728.349	769.911	556.502	624.356	1166.97	1075.08
WBGene00002717	let-526	protein_coding	I	5300852	5317392	4629.75	5481.65	5576.84	5578.23	3497.55	4934.24	5172.62	5086.61
WBGene00002783	let-607	protein_coding	I	6574004	6585510	1783.9	1885.36	2235.25	2115.44	1178.79	1740.63	2413.69	2178.75
WBGene00002804	let-630	protein_coding	I	5162602	5164884	769.695	721.237	1034.09	993.258	647.096	667.648	1220.47	1352.43
WBGene00002827	let-653	protein_coding	IV	11885613	11891082	122.978	212.783	440.409	426.72	100.3	134.684	35.3321	40.0296
WBGene00002845	let-711	protein_coding	III	6946718	6958894	9003.41	9394.63	9972.43	9921.69	6752.45	8647.99	13489.8	13258.4
WBGene00002850	let-716	protein_coding	III	6383552	6389410	2773.51	2640	3316.09	3370.18	1811.87	2216.19	4164.14	4434.7
WBGene00002855	let-721	protein_coding	III	6444693	6446907	1254.37	1286.6	1355.23	1316.48	1314.68	1151.55	1660.61	1747
WBGene00002879	let-754	protein_coding	III	7949971	7953308	775.482	765.773	1494.15	1452.66	678.372	744.61	1362.81	1295.24
WBGene00002881	let-756	protein_coding	III	6407129	6410033	227.147	298.144	210.376	196.11	179.03	228.642	46.4365	37.1703
WBGene00002889	let-765	protein_coding	III	6592525	6601173	4130.6	4021.85	4523.89	4423.36	2709.17	3606.64	6138.71	5912.94
WBGene00002891	let-767	protein_coding	III	6338508	6339969	2369.85	1785.15	2515.75	2551.24	1482.93	3255.5	3265.7	3336.75
WBGene00002915	let-805	protein_coding	III	2658083	2681112	11625	13728.2	15299.3	14940.6	6627.34	11315.1	3580.66	3576.93
WBGene00002957	let-858	protein_coding	II	11022370	11027906	1305.01	1081.24	1403.31	1418.16	1015.94	1009.17	1900.87	2178.75
WBGene00002974	lev-1	protein_coding	IV	13174157	13179395	133.105	176.907	145.298	130.74	131.576	189.199	16.1518	20.0148
WBGene00002975	lev-8	protein_coding	X	11560915	11563707	27.4891	53.1958	36.1253	39.9482	56.0816	59.6458	6.05694	14.2963
WBGene00002976	lev-9	protein_coding	X	6281847	6291732	101.276	128.66	104.657	103.502	111.085	150.718	23.2183	20.0148
WBGene00002977	lev-10	protein_coding	I	14390333	14400226	27.4891	21.0309	24.172	30.8691	22.6484	31.1056	3.02847	8.57776
WBGene00002978	lev-11	protein_coding	I	14621169	14631094	11609.1	12227.6	10232.5	10530	8551.37	9547.49	5242.28	5383.97
WBGene00002979	lfe-2	protein_coding	I	5027155	5041160	578.718	560.412	426.065	419.456	415.22	588.441	240.258	257.333
WBGene00002980	lgg-1	protein_coding	II	6346960	6347719	3915.03	4379.38	1488.04	1452.66	5566.1	3829.84	1816.07	1758.44
WBGene00002981	lgg-2	protein_coding	IV	10934196	10935903	1998.02	2042.47	741.365	817.123	1907.85	1915.08	928.73	797.732
WBGene00002982	lgg-3	protein_coding	III	5697494	5698013	215.573	204.124	145.298	145.266	190.893	199.461	268.524	348.829
WBGene00002983	lgx-1	protein_coding	X	5525123	5538516	162.041	664.329	927.835	837.097	344.039	727.935	25.2372	25.7333
WBGene00002985	lig-1	protein_coding	V	10814106	10816718	1365.77	1253.19	1289.09	1198.45	1143.2	1029.69	2314.76	2218.78
WBGene00002986	lig-4	protein_coding	III	7521463	7524870	296.593	304.33	306.799	326.849	242.661	284.76	466.384	480.355
WBGene00002987	lim-4	protein_coding	X	3869404	3873545	36.1699	77.9381	25.2346	23.6058	37.7473	62.2112	1.00949	0
WBGene00002988	lim-6	protein_coding	X	1072452	1079452	37.6167	49.4845	26.2971	27.2374	44.2182	52.2702	20.1898	14.2963
WBGene00002989	lim-7	protein_coding	I	5716574	5725809	138.892	194.227	103.594	98.0548	133.733	183.747	38.3606	37.1703
WBGene00002990	lin-1	protein_coding	IV	2275861	2300286	224.253	252.371	237.47	256.032	188.736	224.794	88.8351	77.1998
WBGene00002991	lin-2	protein_coding	X	12399517	12414041	334.21	468.866	376.925	314.138	306.292	419.765	103.977	114.37
WBGene00002992	lin-3	protein_coding	IV	11054308	11063768	363.146	287.01	393.925	412.193	326.783	350.499	647.083	597.584
WBGene00002994	lin-5	protein_coding	II	7860574	7863563	1481.52	1479.59	1813.17	1850.33	1272.62	1322.47	2523.72	2436.08
WBGene00002996	lin-7	protein_coding	II	14345844	14349406	339.997	415.67	403.222	410.377	427.083	374.229	603.675	600.443
WBGene00002997	lin-8	protein_coding	II	3056822	3060207	186.637	207.835	192.314	212.452	243.739	172.203	230.164	211.585
WBGene00002998	lin-9	protein_coding	III	8900237	8904131	740.759	757.113	773.505	771.727	638.468	649.69	1248.74	1229.48
WBGene00002999	lin-10	protein_coding	I	8109746	8119316	719.057	982.267	751.99	731.779	584.543	770.264	566.324	640.473
WBGene00003000	lin-11	protein_coding	I	10248288	10255327	70.893	128.66	53.6566	76.2648	89.5149	90.11	22.2088	20.0148
WBGene00003001	lin-12	protein_coding	III	9060221	9071472	149.02	152.165	235.877	208.82	177.951	149.114	71.6738	48.6073
WBGene00003002	lin-13	protein_coding	III	7700338	7709491	3761.67	3622.27	4059.04	3980.3	2548.48	3405.58	5906.52	5872.91
WBGene00003003	lin-14	protein_coding	X	11465560	11485871	2272.92	2991.34	1498.4	1478.08	1767.65	3148.4	207.955	280.207
WBGene00003006	lin-17	protein_coding	I	2706883	2717549	193.871	347.629	260.314	237.874	227.562	261.992	54.5124	48.6073
WBGene00003007	lin-18	protein_coding	X	3958552	3961907	146.126	180.618	174.782	165.24	160.695	169.958	68.6453	85.7776
WBGene00003008	lin-22	protein_coding	IV	3019738	3023304	18.8083	37.1134	34.0002	32.6849	30.1978	20.2026	4.03796	5.71851
WBGene00003009	lin-23	protein_coding	II	6371303	6374776	1636.33	1611.96	1464.14	1441.77	1502.34	1612.68	2177.47	2187.33
WBGene00003010	lin-24	protein_coding	IV	12129504	12135096	465.868	449.072	418.628	417.641	427.083	444.136	612.76	614.74
WBGene00003011	lin-25	protein_coding	V	12649925	12658714	306.721	366.185	302.815	308.691	301.978	325.166	255.401	188.711
WBGene00003012	lin-26	protein_coding	II	7682198	7684764	956.332	978.556	972.46	989.627	871.422	986.721	1244.7	1146.56
WBGene00003014	lin-28	protein_coding	I	8407630	8410804	813.099	809.072	505.754	510.248	788.378	615.057	552.191	586.147
WBGene00003015	lin-29	protein_coding	II	11917643	11935340	62.2122	44.536	205.595	217.899	36.6688	49.3841	53.5029	54.3258
WBGene00003017	lin-31	protein_coding	II	3982549	3987029	15.9148	18.5567	46.4847	34.5008	15.0989	14.1098	10.0949	17.1555
WBGene00003018	lin-32	protein_coding	X	2229055	2230122	14.468	16.0825	3.18752	10.895	16.1774	13.4684	1.00949	0
WBGene00003019	lin-33	protein_coding	IV	5930645	5933326	138.892	163.299	155.923	152.53	142.361	153.604	40.3796	54.3258
WBGene00003020	lin-35	protein_coding	I	5807709	5815637	1177.69	964.948	1059.05	1020.5	935.053	935.733	1716.13	1666.94
WBGene00003021	lin-36	protein_coding	III	8016648	8020873	1565.43	1501.85	1604.92	1554.35	1165.85	1435.99	2876.04	2713.43
WBGene00003022	lin-37	protein_coding	III	7070890	7072552	477.443	413.196	379.581	394.035	413.063	376.794	691.5	663.347
WBGene00003024	lin-39	protein_coding	III	7528641	7536632	135.999	157.113	119.798	88.9756	101.378	125.705	33.3132	40.0296
WBGene00003025	lin-40	protein_coding	V	3704988	3712796	1215.31	1585.98	1940.4	2011.94	1521.75	1360.31	1829.19	1884.25
WBGene00003026	lin-41	protein_coding	I	9334800	9342496	4521.24	4051.54	6062.93	6015.84	2714.57	3782.05	7739.76	7494.1
WBGene00003029	lin-44	protein_coding	I	4126056	4129310	46.2975	75.4639	77.8287	81.7123	74.416	66.38	17.1613	5.71851
WBGene00003030	lin-45	protein_coding	IV	6742537	6748572	1947.39	1609.48	1685.67	1646.96	1309.29	1678.74	2454.07	2410.35
WBGene00003031	lin-46	protein_coding	V	12968855	12970730	21.7019	22.268	47.8128	52.659	26.9623	19.8819	7.06643	5.71851
WBGene00003033	lin-48	protein_coding	III	3745438	3747572	33.2763	25.9794	24.4377	14.5266	20.4914	33.0296	4.03796	2.85925
WBGene00003034	lin-49	protein_coding	IV	8620683	8626162	1264.5	1238.35	1097.04	1100.39	896.228	1094.15	1649.51	1626.92
WBGene00003035	lin-52	protein_coding	III	9824083	9824750	228.594	227.629	180.892	174.32	272.859	206.836	326.065	314.518
WBGene00003036	lin-53	protein_coding	I	9618196	9619760	1705.77	1494.43	1725.78	1685.09	1514.2	1374.74	2759.94	2624.79
WBGene00003037	lin-54	protein_coding	IV	13241044	13243401	656.845	583.917	683.458	759.017	571.601	572.728	1250.76	1232.34
WBGene00003038	lin-56	protein_coding	II	10450007	10452005	179.403	160.825	140.251	134.371	157.46	154.245	222.088	237.318
WBGene00003039	mir-48	miRNA	V	14364412	14364509	2.89359	0	5.84379	10.895	0	1.60338	1.00949	2.85925
WBGene00003040	lin-59	protein_coding	I	3713449	3721157	1919.9	2194.64	1942.79	1981.07	1339.49	1849.66	1058.95	1052.21
WBGene00003041	lin-61	protein_coding	I	7248827	7251282	529.527	507.216	521.426	544.749	503.656	443.495	799.516	826.324
WBGene00003043	lip-1	protein_coding	IV	6842958	6846011	992.502	922.886	1044.44	1020.5	701.02	969.725	1443.57	1423.91
WBGene00003044	lir-1	protein_coding	II	7672005	7682363	561.357	567.835	519.566	497.537	654.645	504.424	742.984	757.702
WBGene00003045	lir-2	protein_coding	II	7667267	7671909	219.913	259.794	186.47	190.662	243.739	176.372	229.154	263.051
WBGene00003046	lir-3	protein_coding	II	11183075	11184807	31.8295	39.5876	25.7658	32.6849	46.3752	30.7849	25.2372	22.874
WBGene00003047	lis-1	protein_coding	III	13371164	13376710	1252.92	993.401	1099.43	1055	789.457	1003.72	1372.91	1326.69
WBGene00003048	lit-1	protein_coding	III	13701991	13724404	1341.18	2121.65	2013.19	2086.39	1120.55	1631.92	1235.62	1295.24
WBGene00003052	lmn-1	protein_coding	I	8763041	8765631	3684.99	3257.32	3421.01	3502.73	3145.96	2990.63	3696.75	4300.32
WBGene00003053	lmp-1	protein_coding	X	6376459	6377684	1433.77	1529.07	1584.46	1745.01	1147.52	1469.66	1152.84	1089.38
WBGene00003055	lon-1	protein_coding	III	5474476	5478005	426.805	243.711	556.488	577.434	211.385	328.693	396.729	380.281
WBGene00003056	lon-2	protein_coding	X	4738964	4749083	232.934	202.886	199.486	174.32	212.463	191.123	208.964	162.977
WBGene00003057	lon-3	protein_coding	V	12197437	12198645	56.425	68.0412	619.442	630.093	30.1978	37.8398	18.1708	28.5925
WBGene00003058	lov-1	protein_coding	II	10109100	10121825	1.4468	8.65979	2.39064	0	3.23548	8.33758	0	0
WBGene00003059	lpd-2	protein_coding	I	6253701	6254947	267.657	249.897	185.408	230.61	189.815	180.22	331.113	437.466
WBGene00003060	lpd-3	protein_coding	I	3564963	3600735	3562.01	3494.84	4458.28	4437.89	1857.17	3152.57	5189.79	5266.75
WBGene00003061	lpd-5	protein_coding	I	4372255	4373018	564.25	540.618	588.629	677.304	623.369	521.419	755.098	774.858
WBGene00003062	lpd-6	protein_coding	I	3144411	3147793	925.949	837.525	1183.63	1105.84	630.918	778.922	1390.07	1569.73
WBGene00003063	lpd-7	protein_coding	III	7573350	7575263	2552.15	2237.94	1972.81	1890.28	1660.88	1928.55	2200.69	2135.86
WBGene00003064	nfu-1	protein_coding	IV	10387413	10388336	449.953	398.35	378.784	370.429	541.404	379.681	590.551	486.073
WBGene00003065	lpd-9	protein_coding	V	10579305	10580693	541.102	449.072	656.364	686.383	498.264	504.744	688.472	629.036
WBGene00003066	lpl-1	protein_coding	IV	9092173	9094032	250.296	189.278	275.986	301.428	159.617	202.026	253.382	248.755
WBGene00003067	lrg-1	pseudogene	III	9504764	9507081	124.424	106.392	142.11	139.819	77.6515	97.1649	262.467	265.911
WBGene00003068	lrk-1	protein_coding	I	10879769	10894237	979.481	1242.06	1213.38	1154.87	863.873	1090.94	760.146	817.747
WBGene00003071	lrp-1	protein_coding	I	7614176	7634143	5063.78	6376.08	7920.2	7904.3	4289.17	5854.26	1580.86	1438.2
WBGene00003072	lrp-2	protein_coding	I	3935272	3953991	3271.2	3900.62	3146.35	3210.39	1811.87	2899.87	1649.51	1784.17
WBGene00003073	lars-1	protein_coding	III	4181549	4186801	3564.9	3167.01	3985.47	3891.32	2831.04	2926.81	4229.76	4428.98
WBGene00003074	lars-2	protein_coding	I	7457152	7460756	496.251	374.845	551.176	526.59	380.708	391.546	689.481	654.769
WBGene00003075	lrx-1	protein_coding	V	12252572	12255450	17.3615	72.9896	77.0318	67.1857	65.7881	86.2619	4.03796	8.57776
WBGene00003076	lsm-1	protein_coding	II	11126950	11127528	308.167	320.412	236.939	256.032	379.63	283.798	436.099	457.481
WBGene00003077	lsm-3	protein_coding	IV	13387203	13389143	238.721	220.206	205.595	199.741	279.33	203.629	308.904	274.488
WBGene00003078	lsm-4	protein_coding	II	7252232	7253163	167.828	143.505	149.282	110.766	234.033	135.967	239.249	237.318
WBGene00003079	lsm-5	protein_coding	V	15570380	15570655	225.7	215.258	190.986	177.951	212.463	201.064	312.942	268.77
WBGene00003080	lsm-6	protein_coding	I	1701361	1701808	175.062	164.536	136.798	132.556	185.501	129.232	178.68	191.57
WBGene00003081	lsm-7	protein_coding	IV	10933502	10934189	227.147	228.866	185.673	194.294	348.353	237.3	305.875	305.94
WBGene00003082	lsm-8	protein_coding	IV	6326526	6329472	332.763	353.814	338.674	366.797	382.865	288.929	494.65	446.044
WBGene00003083	lst-1	protein_coding	I	10588501	10590465	685.781	623.505	830.615	942.415	625.526	697.791	1486.98	1378.16
WBGene00003084	lst-2	protein_coding	X	4378004	4383366	536.761	551.752	510.535	566.539	381.787	471.715	358.369	325.955
WBGene00003085	ccar-1	protein_coding	IV	14071548	14076742	3867.28	3952.57	4947.57	4924.53	3046.74	3446.31	6373.92	6839.33
WBGene00003086	lst-4	protein_coding	IV	14061000	14069860	1087.99	978.556	1213.65	1145.79	929.661	1058.23	1965.48	1852.8
WBGene00003087	lsy-2	protein_coding	X	2089704	2093256	290.806	399.587	356.206	295.98	319.234	305.925	288.714	323.096
WBGene00003089	ltd-1	protein_coding	II	8088427	8092754	263.317	452.783	328.846	377.692	307.371	354.347	26.2467	14.2963
WBGene00003090	lys-1	protein_coding	V	10277904	10279056	1807.05	1279.17	2293.16	2347.87	1670.59	1506.86	2045.23	2110.13
WBGene00003091	lys-2	protein_coding	V	10280307	10281474	571.484	290.721	815.209	886.125	666.509	408.541	780.335	631.895
WBGene00003092	lys-3	protein_coding	V	10282100	10283544	30.3827	2.47422	15.672	32.6849	31.2763	19.2406	5.04745	0
WBGene00003093	lys-4	protein_coding	IV	11621429	11623174	1099.56	1834.64	584.379	617.382	3601.09	2579.2	418.938	377.421
WBGene00003094	lys-5	protein_coding	IV	11624252	11625582	4.34039	14.8453	1.59376	1.81583	23.7268	16.0338	1.00949	5.71851
WBGene00003095	lys-6	protein_coding	IV	11626910	11627947	14.468	9.8969	7.70318	5.44749	43.1397	43.2913	5.04745	8.57776
WBGene00003096	lys-7	protein_coding	V	3481432	3482600	1164.67	1037.94	473.613	526.59	1794.61	2134.42	235.211	297.362
WBGene00003097	lys-8	protein_coding	II	5586178	5587651	1671.05	1801.24	1784.75	1783.14	1765.49	1711.77	1302.24	1289.52
WBGene00003099	lys-10	protein_coding	IV	8332826	8333518	14.468	33.402	16.2032	9.07914	32.3548	17.9579	14.1329	2.85925
WBGene00003100	mab-3	protein_coding	II	9732137	9738035	1.4468	2.47422	37.719	30.8691	5.39247	7.37555	5.04745	5.71851
WBGene00003102	mab-5	protein_coding	III	7776835	7783454	82.4673	101.443	64.5473	74.449	87.3579	69.9074	16.1518	11.437
WBGene00003104	mab-7	protein_coding	X	892228	898048	43.4039	95.2577	113.423	108.95	60.3956	104.861	12.1139	8.57776
WBGene00003106	mab-9	protein_coding	II	516024	521635	33.2763	28.4536	37.1878	34.5008	26.9623	32.709	11.1044	5.71851
WBGene00003107	mab-10	protein_coding	II	10528084	10534380	118.637	97.7319	309.721	303.243	63.6311	106.785	191.803	234.459
WBGene00003111	mab-20	protein_coding	I	1644588	1651457	335.657	713.814	431.112	435.799	548.953	501.217	341.207	297.362
WBGene00003112	mab-21	protein_coding	III	4600753	4603052	79.5738	77.9381	98.0163	108.95	72.259	71.8315	31.2942	20.0148
WBGene00003114	mab-23	protein_coding	V	10633058	10635525	1.4468	0	2.39064	0	1.07849	1.60338	0	0
WBGene00003119	mac-1	protein_coding	II	13311413	13320911	610.548	670.515	942.975	989.627	689.157	561.504	998.385	1049.35
WBGene00003123	mag-1	protein_coding	I	11912005	11912677	626.462	548.041	754.38	731.779	742.003	538.415	771.25	886.369
WBGene00003124	mai-1	protein_coding	X	3114668	3116589	172.169	178.144	144.501	134.371	145.597	154.245	86.8161	94.3554
WBGene00003129	map-1	protein_coding	IV	3683537	3686865	425.358	389.69	546.394	568.354	382.865	327.731	643.045	654.769
WBGene00003130	map-2	protein_coding	IV	16848262	16854890	1150.2	1086.18	1617.4	1645.14	852.01	913.606	1704.02	1924.28
WBGene00003132	mat-1	protein_coding	I	5123915	5127201	1442.46	1458.56	1590.31	1610.64	1358.9	1339.46	2401.58	2353.17
WBGene00003133	apc-1	protein_coding	II	11108161	11120805	1876.49	1734.43	2392.24	2400.53	1553.03	1606.59	3394.91	3551.19
WBGene00003134	mat-3	protein_coding	III	475454	482325	548.336	496.082	594.739	581.065	463.752	425.537	809.611	869.213
WBGene00003136	mau-2	protein_coding	I	8125801	8130039	567.144	482.474	438.55	423.088	516.598	441.571	815.667	800.591
WBGene00003142	mau-8	protein_coding	IV	13378016	13380459	182.296	251.134	161.767	154.345	204.914	207.798	227.135	251.614
WBGene00003143	max-1	protein_coding	V	13098903	13120220	225.7	413.196	284.221	305.059	276.094	406.938	32.3037	68.6221
WBGene00003144	max-2	protein_coding	II	13014317	13025844	1969.09	2276.29	2363.02	2409.61	1504.5	2050.4	2881.08	2813.51
WBGene00003148	mbf-1	protein_coding	IV	11479354	11480369	850.716	672.989	956.788	940.599	764.652	754.23	1156.87	1195.17
WBGene00003149	mbk-1	protein_coding	X	14819909	14824540	570.037	825.154	595.535	617.382	457.281	634.618	498.688	420.31
WBGene00003150	mbk-2	protein_coding	IV	13009158	13035961	4262.26	4933.6	4843.17	4781.08	3951.6	4617.1	6535.43	6324.67
WBGene00003151	mca-1	protein_coding	IV	9625909	9634948	3120.74	2736.49	3120.05	2959.8	1986.58	2503.52	1364.83	1172.29
WBGene00003153	mca-3	protein_coding	IV	3103157	3133149	7262.91	7534.01	8576.56	8403.66	4693.6	6592.78	5543.11	5529.8
WBGene00003154	mcm-2	protein_coding	II	12001509	12006625	2719.98	2244.12	3583.31	3729.71	2594.85	2204.97	5063.6	5006.55
WBGene00003155	mcm-3	protein_coding	V	15056719	15059599	2595.55	2351.75	3274.65	3253.97	2457.89	2210.1	4925.3	4900.76
WBGene00003156	mcm-4	protein_coding	I	2318291	2321817	2194.79	1953.4	2821.49	2881.72	2095.51	1781.36	4195.44	4151.64
WBGene00003157	mcm-5	protein_coding	III	4288264	4291266	2280.15	1828.45	2398.34	2336.97	2000.6	1796.43	3704.83	3771.36
WBGene00003158	mcm-6	protein_coding	III	9794367	9798644	2520.32	2127.83	2567.28	2607.53	2042.67	2042.07	4266.1	4346.07
WBGene00003159	mcm-7	protein_coding	V	4347166	4349768	3248.06	2991.34	4017.34	3873.16	2854.77	2760.7	6314.36	6293.22
WBGene00003160	mdf-1	protein_coding	V	9541782	9544226	936.077	882.061	970.601	862.519	867.108	775.716	1530.39	1446.78
WBGene00003161	mdf-2	protein_coding	IV	2636227	2641125	539.655	457.732	575.879	532.038	607.192	447.664	853.019	849.198
WBGene00003162	mdh-2	protein_coding	III	6606544	6608106	3813.75	3496.08	5652.81	5834.26	2797.61	3618.51	5651.12	5481.19
WBGene00003163	mdl-1	protein_coding	X	6742351	6743899	1129.95	1055.26	886.131	858.887	762.495	1137.76	324.046	165.837
WBGene00003164	mdt-6	protein_coding	V	7058547	7059624	444.166	372.371	398.44	401.298	367.766	360.119	691.5	677.643
WBGene00003165	mec-1	protein_coding	V	6956537	6966425	326.976	358.763	341.596	339.56	245.896	372.626	39.3701	31.4518
WBGene00003166	mec-2	protein_coding	X	5567754	5590830	245.955	289.484	193.642	183.399	182.265	286.043	28.2657	11.437
WBGene00003167	mec-3	protein_coding	IV	10458816	10461867	37.6167	24.7422	22.5783	18.1583	42.0612	33.3503	2.01898	0
WBGene00003168	mec-4	protein_coding	X	16803321	16807115	83.9141	74.2267	47.5472	63.554	35.5903	54.1943	4.03796	2.85925
WBGene00003169	mec-5	protein_coding	X	15944009	15948952	140.339	231.34	201.876	188.846	172.559	172.844	80.7592	108.652
WBGene00003170	mec-6	protein_coding	I	6724867	6728330	43.4039	54.4329	21.7814	27.2374	52.8462	45.8567	16.1518	14.2963
WBGene00003171	mec-7	protein_coding	X	7774856	7776689	664.079	789.278	639.629	735.411	471.301	590.044	57.5409	54.3258
WBGene00003172	mec-8	protein_coding	I	9441010	9444227	509.272	732.371	537.894	535.67	475.615	594.534	225.116	223.022
WBGene00003173	mec-9	protein_coding	V	9907615	9915121	175.062	183.093	111.829	90.7914	112.163	135.967	9.0854	17.1555
WBGene00003174	mec-10	protein_coding	X	8465760	8470314	56.425	44.536	33.7346	41.7641	29.1193	46.498	7.06643	11.437
WBGene00003175	mec-12	protein_coding	III	3131574	3139234	839.141	972.37	906.85	911.546	545.717	751.986	108.015	125.807
WBGene00003176	mec-14	protein_coding	III	7190189	7192992	15.9148	11.134	9.03131	10.895	18.3344	16.3545	2.01898	0
WBGene00003177	mec-15	protein_coding	II	10236936	10239695	580.165	533.195	442.003	446.694	581.308	428.103	940.844	880.65
WBGene00003178	mec-17	protein_coding	IV	7983802	7987183	298.04	304.33	271.471	281.453	255.603	266.161	42.3986	57.1851
WBGene00003179	mec-18	protein_coding	X	4271165	4274216	141.786	124.948	92.9694	118.029	88.4364	108.389	8.07592	5.71851
WBGene00003181	med-2	protein_coding	III	6884503	6885027	2.89359	1.23711	0.531254	0	0	3.20676	0	0
WBGene00003182	mef-2	protein_coding	I	9095957	9100862	507.825	503.505	333.362	334.113	354.824	507.31	103.977	108.652
WBGene00003183	mei-1	protein_coding	I	8294874	8296940	1001.18	934.02	1196.91	1158.5	923.19	909.117	1938.22	1930
WBGene00003184	mei-2	protein_coding	I	6564749	6565852	892.673	771.958	871.256	878.861	852.01	829.91	1764.59	1812.77
WBGene00003185	mek-1	protein_coding	X	7479248	7481005	616.335	600	882.412	891.572	602.878	505.706	980.214	1026.47
WBGene00003186	mek-2	protein_coding	I	3005403	3013448	636.59	566.598	638.036	628.277	452.967	550.601	730.87	629.036
WBGene00003196	mel-11	protein_coding	II	9358530	9369099	1511.9	1696.08	1543.56	1550.72	1231.64	1476.39	2072.48	1987.18
WBGene00003209	mel-26	protein_coding	I	9132538	9135753	1409.18	1232.16	1317.24	1274.71	1396.65	1188.43	2298.61	2224.5
WBGene00003210	mel-28	protein_coding	III	4786080	4792391	3204.65	2807.01	3394.98	3368.36	2112.77	2575.67	5756.11	5698.49
WBGene00003214	mel-32	protein_coding	III	6440145	6443000	2867.55	2615.26	4809.71	4937.24	2467.59	2642.69	4913.19	4980.82
WBGene00003216	memi-1	protein_coding	IV	4758982	4760428	484.677	402.062	469.363	486.642	340.804	380.643	945.892	920.68
WBGene00003218	mep-1	protein_coding	IV	11524642	11527954	2151.38	2365.36	2551.61	2603.9	1711.57	2015.77	3073.9	3090.85
WBGene00003219	mes-1	protein_coding	X	11857478	11862373	166.381	138.557	202.408	254.216	156.381	144.304	335.15	337.392
WBGene00003220	mes-2	protein_coding	II	14383973	14388454	642.377	556.701	728.083	722.7	482.086	545.791	1098.32	1057.92
WBGene00003221	mes-3	protein_coding	I	4996835	5003202	1098.12	1034.23	1104.48	1085.87	967.408	941.826	1504.14	1526.84
WBGene00003222	mes-4	protein_coding	V	13433050	13437545	1040.25	926.597	1226.93	1185.74	760.338	823.176	2132.04	2018.63
WBGene00003224	mes-6	protein_coding	IV	8511284	8513469	480.336	441.649	549.848	502.985	477.772	423.613	747.022	777.717
WBGene00003225	mev-1	protein_coding	III	10334277	10335168	753.78	822.68	917.475	984.179	594.25	712.863	869.17	794.873
WBGene00003228	mex-1	protein_coding	II	11968637	11972347	2012.49	1770.31	2507.78	2513.11	1570.29	1745.44	4552.8	4817.84
WBGene00003229	mex-3	protein_coding	I	127285	134270	2578.19	2408.66	3185.93	3095.99	2206.6	2332.92	6040.78	6321.81
WBGene00003230	mex-5	protein_coding	IV	13353723	13356104	4145.07	3520.82	4978.38	5035.29	3361.66	3824.7	9814.26	9984.51
WBGene00003231	mex-6	protein_coding	II	9524174	9526359	2249.77	1847.01	2696.11	2516.74	1966.09	2002.3	5166.57	4729.21
WBGene00003232	mgl-1	protein_coding	X	9968517	9976306	81.0205	80.4123	50.7347	52.659	38.8258	89.4686	3.02847	5.71851
WBGene00003233	mgl-2	protein_coding	I	10383144	10391388	267.657	314.227	198.423	223.347	199.521	270.33	81.7686	42.8888
WBGene00003234	mif-1	protein_coding	III	11848152	11849413	115.744	133.608	129.626	116.213	124.027	138.211	110.034	134.385
WBGene00003235	mif-2	protein_coding	V	11976777	11978459	176.509	195.464	182.22	216.084	190.893	168.996	133.253	111.511
WBGene00003236	mif-3	protein_coding	I	7312797	7313525	183.743	149.691	129.626	108.95	211.385	161.3	210.983	203.007
WBGene00003237	mif-4	protein_coding	IV	6335230	6335994	20.2551	19.7938	15.1407	10.895	25.8838	16.0338	7.06643	8.57776
WBGene00003238	mig-1	protein_coding	I	948569	957456	271.998	414.433	303.611	281.453	243.739	316.828	108.015	117.229
WBGene00003239	mig-2	protein_coding	X	11548608	11550692	225.7	262.268	213.83	226.979	335.411	233.132	180.699	148.681
WBGene00003241	mig-5	protein_coding	II	8182323	8185023	853.609	742.267	968.476	1029.58	729.061	710.298	1544.52	1455.36
WBGene00003242	mig-6	protein_coding	V	7827217	7842390	6073.65	9833.81	10543.5	10557.2	4898.52	7217.46	3957.2	3948.63
WBGene00003243	mig-10	protein_coding	III	8279101	8305837	668.42	1063.92	615.457	577.434	695.628	971.649	194.831	151.54
WBGene00003245	mig-13	protein_coding	X	4796087	4800128	50.6378	98.969	63.7504	56.2907	78.73	93.9581	33.3132	40.0296
WBGene00003246	mig-14	protein_coding	II	13741738	13749983	380.507	456.494	480.785	432.167	445.418	426.179	622.855	689.08
[truncated: 19,233 more rows]

## Sheet: WRM66 aux v ct
Gene	Name	Type	Chr	Start	End	baseMean	log2FoldChange_shrunken	lfcSE_shrunken	pvalue	padj	log2FoldChange_raw	lfcSE_raw	UP_WrM66 aux vs ct	DOWN_WrM66 aux vs ct
WBGene00000001	aap-1	protein_coding	I	5107843	5110183	578.641	0.00851193	0.145246	0.944687	0.976495	0.0119296	0.171946
WBGene00000002	aat-1	protein_coding	IV	9599178	9601695	97.2642	-0.0918454	0.221513	0.529739	0.747335	-0.20526	0.326636
WBGene00000003	aat-2	protein_coding	V	9244402	9246360	151.282	0.135511	0.211658	0.353074	0.59941	0.271656	0.29253
WBGene00000004	aat-3	protein_coding	X	2552260	2557736	301.974	-0.251713	0.201859	0.0855219	0.253826	-0.422056	0.245452
WBGene00000005	aat-4	protein_coding	IV	6272529	6275721	64.5825	0.616691	0.413799	0.00745656	0.044535	1.02736	0.383953	Up
WBGene00000006	aat-5	protein_coding	I	2571740	2576020	276.748	-0.243684	0.185089	0.0830739	0.24919	-0.384065	0.221603
WBGene00000007	aat-6	protein_coding	V	11466842	11470663	123.02	0.0460897	0.202453	0.746391	0.882595	0.092541	0.286148
WBGene00000008	aat-7	protein_coding	II	1386870	1391639	12.0058	-0.0219507	0.35101	0.883578	0.950882	-0.119787	0.818024
WBGene00000009	aat-8	protein_coding	IV	3862033	3865044	20.3848	-0.276222	0.432612	0.140956	0.348481	-0.978495	0.664629
WBGene00000010	aat-9	protein_coding	I	11388682	11396662	571.99	0.180993	0.150547	0.149136	0.360824	0.25341	0.175663
WBGene00000012	abf-1	protein_coding	I	3886070	3887095	6.0193	0.168481	0.515041	0.316447	0.565004	1.26346	1.26121
WBGene00000013	abf-2	protein_coding	I	3885631	3885888	12.6249	-0.491852	0.630059	0.0446554	0.163054	-1.60726	0.800475
WBGene00000016	abf-5	protein_coding	X	12792854	12793386	27.8092	-0.19466	0.334889	0.240697	0.483426	-0.630939	0.537772
WBGene00000017	abf-6	protein_coding	X	12794118	12794870	50.4217	-0.105345	0.252536	0.481881	0.710197	-0.283768	0.403492
WBGene00000018	abl-1	protein_coding	X	10605827	10624207	602.508	-0.13722	0.167061	0.302236	0.551527	-0.211789	0.205291
WBGene00000019	abt-1	protein_coding	IV	10206189	10214911	20.0468	0.156345	0.386402	0.342676	0.589246	0.712411	0.750782
WBGene00000020	abt-2	protein_coding	I	2255921	2272866	566.197	-0.00232882	0.172188	0.986194	0.993794	-0.00381207	0.2203
WBGene00000021	abt-3	pseudogene	IV	12950315	12957128	2.89843	0.0474964	0.500227	0.745073	NA	0.544074	1.67334
WBGene00000022	abt-4	protein_coding	V	323777	330725	921.207	0.579403	0.196046	0.000102316	0.00134243	0.706446	0.181838	Up
WBGene00000023	abt-5	protein_coding	I	12011195	12018684	18.5596	0.291519	0.500166	0.135543	0.339609	1.22315	0.819479
WBGene00000024	abu-1	protein_coding	V	10380340	10381826	15.2423	2.78435	1.08882	5.0001e-05	0.000723541	3.72588	0.918694	Up
WBGene00000027	abu-4	protein_coding	V	2274842	2275977	0.59462	-0.0337285	0.648179	0.760052	NA	-1.14752	3.75726
WBGene00000029	abu-6	protein_coding	V	5160678	5161892	14.2422	3.44034	1.92602	9.92664e-05	0.00131132	6.10502	1.56846	Up
WBGene00000030	abu-7	protein_coding	V	5163270	5164782	23.1686	6.03551	1.48401	9.51884e-08	2.67722e-06	8.24521	1.5453	Up
WBGene00000031	abu-8	protein_coding	V	5192995	5194608	259.02	1.68219	0.338838	4.24909e-08	1.27878e-06	1.83854	0.335489	Up
WBGene00000033	abu-10	protein_coding	X	3798182	3799741	75.6679	2.26176	0.458692	1.53047e-08	5.00526e-07	2.49907	0.44168	Up
WBGene00000034	abu-11	protein_coding	II	192509	194558	113.5	1.21239	0.456466	0.00017064	0.00209329	1.5032	0.399902	Up
WBGene00000035	ace-1	protein_coding	X	16367293	16373789	149.145	-0.28209	0.214153	0.0614731	0.203538	-0.478241	0.255733
WBGene00000036	ace-2	protein_coding	I	3301368	3307935	374.36	-0.0306402	0.162812	0.815076	0.919363	-0.047278	0.202144
WBGene00000037	ace-3	protein_coding	II	14205635	14210214	213.013	-1.10147	0.289171	4.4229e-06	8.64954e-05	-1.22276	0.26637
WBGene00000038	ace-4	protein_coding	II	14198046	14205460	48.2479	-0.189524	0.275459	0.231735	0.473104	-0.484876	0.405448
WBGene00000039	acn-1	protein_coding	X	5092481	5097067	804.199	0.911686	0.623739	0.00432546	0.0294918	1.56744	0.549323	Up
WBGene00000040	aco-1	protein_coding	X	11339874	11343327	3003.2	0.866738	0.217003	1.06363e-06	2.41959e-05	0.952573	0.19522	Up
WBGene00000041	aco-2	protein_coding	III	7973717	7977355	8271.87	0.287379	0.130967	0.0116247	0.0622034	0.360139	0.142724
WBGene00000042	acr-2	protein_coding	X	6702549	6709308	28.261	-0.0644882	0.292146	0.666365	0.835855	-0.238432	0.553024
WBGene00000043	acr-3	protein_coding	X	6709538	6712925	9.97321	-0.282009	0.510037	0.1456	0.355981	-1.26692	0.870588
WBGene00000044	acr-5	protein_coding	III	6509445	6514773	24.5909	-0.393262	0.451609	0.0595096	0.198524	-1.05144	0.557968
WBGene00000045	acr-6	protein_coding	I	4359207	4362548	2.57271	-0.0459498	0.49794	0.753235	NA	-0.521731	1.65957
WBGene00000046	acr-7	protein_coding	II	7845631	7849797	15.9476	-0.0520638	0.328238	0.729345	0.873103	-0.241715	0.698604
WBGene00000047	acr-8	protein_coding	X	10412725	10416661	88.7492	-0.221089	0.253575	0.16029	0.377976	-0.481532	0.342948
WBGene00000048	acr-9	protein_coding	X	13642313	13646898	22.4593	-0.0896005	0.307232	0.55609	0.76472	-0.343164	0.58296
WBGene00000049	acr-10	protein_coding	X	4022267	4025641	6.52338	-0.155205	0.479562	0.350797	0.597689	-1.06065	1.13676
WBGene00000050	acr-11	protein_coding	I	6621624	6624918	20.9298	-0.211621	0.369969	0.217654	0.455728	-0.745257	0.604529
WBGene00000051	acr-12	protein_coding	X	13532853	13536459	42.7741	-0.194375	0.295827	0.228758	0.468758	-0.536971	0.446151
WBGene00000053	acr-14	protein_coding	II	8174937	8177195	8.2077	-0.0192872	0.386603	0.897937	0.957015	-0.127008	0.990186
WBGene00000054	acr-15	protein_coding	V	8552695	8555383	37.7084	-0.00463289	0.265045	0.97479	0.988924	-0.0151409	0.479115
WBGene00000055	acr-16	protein_coding	V	8561216	8564345	52.8467	-0.00558286	0.242201	0.969465	0.987432	-0.0153938	0.40215
WBGene00000056	acr-17	protein_coding	V	2608652	2615262	15.9226	0.00395775	0.333359	0.978814	0.991051	0.0197976	0.745524
WBGene00000057	acr-18	protein_coding	V	15551157	15559147	20.9735	-0.171826	0.350459	0.296049	0.544928	-0.63767	0.610243
WBGene00000058	acr-19	protein_coding	I	9031235	9036695	32.9071	-0.579337	0.506197	0.0183364	0.0866479	-1.20632	0.511422
WBGene00000059	acr-20	protein_coding	II	14373831	14377896	27.0934	-0.0901621	0.296406	0.552095	0.761376	-0.324791	0.546213
WBGene00000060	acr-21	protein_coding	III	6581885	6586580	19.5954	-0.188342	0.369683	0.263109	0.508373	-0.715941	0.639763
WBGene00000061	lgc-11	protein_coding	X	7503780	7506633	20.8562	-0.20902	0.371804	0.222819	0.461974	-0.747596	0.613253
WBGene00000062	acr-23	protein_coding	V	3651656	3659572	20.2569	0.0948645	0.316656	0.535827	0.751401	0.377332	0.609449
WBGene00000063	act-1	protein_coding	V	11081052	11082415	2513.97	0.242777	0.134319	0.0366819	0.142159	0.312066	0.149365
WBGene00000064	act-2	protein_coding	V	11076777	11078154	6503.57	0.331539	0.124398	0.00242809	0.018941	0.401483	0.132408
WBGene00000065	act-3	protein_coding	V	11071690	11074498	3663.62	-0.0582818	0.129896	0.608562	0.799477	-0.0758059	0.148022
WBGene00000066	act-4	protein_coding	X	4960621	4964413	19164.6	-0.000392255	0.134467	0.997316	0.99906	-0.000521647	0.155067
WBGene00000067	act-5	protein_coding	III	13604412	13606066	5871.37	0.877142	0.158425	5.57951e-10	2.27729e-08	0.921479	0.148581	Up
WBGene00000068	acy-1	protein_coding	III	4722095	4730919	391.275	-0.252156	0.190771	0.0772823	0.237859	-0.403819	0.228575
WBGene00000069	acy-2	protein_coding	V	5976024	5981478	62.2748	-0.453135	0.347942	0.0210666	0.0958468	-0.838585	0.363529
WBGene00000070	acy-3	protein_coding	III	3774896	3786477	406.999	0.0842654	0.169774	0.529063	0.746776	0.134365	0.213469
WBGene00000071	acy-4	protein_coding	V	5624727	5630892	131.634	-0.224085	0.226351	0.140776	0.348148	-0.432008	0.293303
WBGene00000072	add-1	protein_coding	X	4854065	4860045	150.152	0.0666825	0.211787	0.643913	0.821592	0.141929	0.307049
WBGene00000073	add-2	protein_coding	V	12009540	12013406	173.616	-0.17737	0.193714	0.213434	0.449935	-0.308527	0.247977
WBGene00000074	adm-2	protein_coding	X	13687955	13695801	449.641	0.00561283	0.151864	0.964484	0.985313	0.00814637	0.182954
WBGene00000075	adm-4	protein_coding	X	7794875	7798298	201.727	0.424079	0.225906	0.00742277	0.0444115	0.625536	0.233648	Up
WBGene00000079	adr-1	protein_coding	I	7773416	7777655	1012.17	0.173169	0.136108	0.140496	0.347789	0.228111	0.154762
WBGene00000080	adr-2	protein_coding	III	7231039	7232882	793.969	-0.0363256	0.147466	0.769293	0.894954	-0.0514494	0.175416
WBGene00000081	ads-1	protein_coding	III	295654	298556	1697.53	-0.0797563	0.132878	0.490368	0.716424	-0.104964	0.152183
WBGene00000082	adt-1	protein_coding	X	12678832	12689279	285.105	0.531452	0.590732	0.033161	0.132687	1.44592	0.678796
WBGene00000083	adt-2	protein_coding	X	7586209	7595416	612.765	0.5512	0.212051	0.000410187	0.00437298	0.702796	0.198898	Up
WBGene00000084	aex-1	protein_coding	I	7602307	7608245	121.735	-0.259119	0.229363	0.0930223	0.267664	-0.479984	0.285762
WBGene00000085	aex-2	protein_coding	X	9650999	9653116	15.2361	-0.0902704	0.345771	0.558641	0.766508	-0.421854	0.721289
WBGene00000086	aex-3	protein_coding	X	751203	759734	397.467	-0.736282	0.262419	0.000101265	0.0013309	-0.890423	0.229045		Down
WBGene00000088	aex-5	protein_coding	I	14850052	14855827	214.905	-0.258488	0.209544	0.0825053	0.248302	-0.443518	0.255434
WBGene00000089	aex-6	protein_coding	I	13543068	13545188	99.3884	-0.183866	0.222986	0.219658	0.457936	-0.369826	0.301299
WBGene00000090	age-1	protein_coding	II	11519328	11527054	1198.54	0.197834	0.141228	0.100374	0.281846	0.264642	0.161069
WBGene00000092	ags-3	protein_coding	X	5289724	5303600	370.985	-0.482007	0.197059	0.00109804	0.00992147	-0.632659	0.193822		Down
WBGene00000093	agt-1	protein_coding	IV	13368276	13369412	163.562	-0.0241246	0.190311	0.863099	0.940821	-0.0445889	0.258591
WBGene00000094	agt-2	protein_coding	II	5371980	5373827	220.006	-0.13339	0.181485	0.334659	0.581801	-0.223599	0.231763
WBGene00000095	aha-1	protein_coding	I	10193925	10196997	264.967	-0.284452	0.190177	0.0465067	0.16753	-0.440622	0.221333
WBGene00000096	ahr-1	protein_coding	I	9522550	9531132	25.6251	-0.184835	0.348938	0.265571	0.510881	-0.653718	0.587178
WBGene00000097	aip-1	protein_coding	V	14012333	14013644	328.897	-0.187902	0.172304	0.16504	0.384955	-0.290802	0.209463
WBGene00000098	air-1	protein_coding	V	8221488	8223582	1467.89	0.0737558	0.150965	0.557175	0.765516	0.106029	0.180616
WBGene00000099	air-2	protein_coding	I	5937195	5938881	533.695	0.0254027	0.152848	0.840889	0.930446	0.0370469	0.184536
WBGene00000100	ajm-1	protein_coding	X	9082946	9113619	2489.96	-0.478243	0.230093	0.00306789	0.0226526	-0.671762	0.226881		Down
WBGene00000101	aka-1	protein_coding	II	7472729	7478537	3317.44	0.0699679	0.142456	0.563694	0.769803	0.0963778	0.166928
WBGene00000102	akt-1	protein_coding	V	10248905	10252845	1754.49	-0.0691061	0.128962	0.541592	0.755015	-0.0894658	0.146567
WBGene00000103	akt-2	protein_coding	X	14147700	14152070	249.757	-0.540266	0.243661	0.00140505	0.0121018	-0.732627	0.229404		Down
WBGene00000105	alg-1	protein_coding	X	13949110	13956261	1771.1	0.316024	0.177776	0.0221462	0.0996738	0.455812	0.199231
WBGene00000106	alg-2	protein_coding	II	873212	879885	1250.39	0.418699	0.174692	0.00221012	0.0175685	0.551447	0.180186
WBGene00000107	alh-1	protein_coding	III	5077764	5080661	3400.17	0.0300258	0.247204	0.837428	0.928686	0.0852888	0.415668
WBGene00000108	alh-2	protein_coding	V	1644169	1647728	1.0558	-0.0215839	0.594872	0.864323	NA	-0.476268	2.78725
WBGene00000109	alh-3	protein_coding	IV	11022603	11025870	1560.95	-0.27092	0.134586	0.0197477	0.0916524	-0.345515	0.148219
WBGene00000110	alh-4	protein_coding	V	6427208	6429920	1573.89	-0.0861414	0.12897	0.446722	0.682368	-0.111394	0.146399
WBGene00000111	alh-5	protein_coding	V	1996105	1999581	119.021	-0.102935	0.210855	0.477481	0.707079	-0.211831	0.298203
WBGene00000112	alh-6	protein_coding	II	1306240	1310133	922.904	0.270938	0.150322	0.0303988	0.124597	0.365445	0.168808
WBGene00000113	alh-7	protein_coding	II	13487243	13491786	614.591	0.466425	0.168181	0.000479258	0.00498563	0.585272	0.167599
WBGene00000114	alh-8	protein_coding	II	11729055	11731198	14205	0.14007	0.147501	0.258246	0.503188	0.195549	0.172969
WBGene00000115	alh-9	protein_coding	III	5856018	5859179	1431.33	0.363549	0.178028	0.00858621	0.0495782	0.504559	0.191986
WBGene00000116	alh-10	protein_coding	X	7140504	7143641	176.621	-0.189836	0.197898	0.187352	0.416222	-0.333594	0.25302
WBGene00000117	alh-11	protein_coding	III	774321	778871	455.129	0.0103926	0.169385	0.937984	0.973714	0.0167099	0.21477
WBGene00000118	alh-12	protein_coding	III	7454074	7455936	703.037	-0.212662	0.155481	0.0964282	0.27425	-0.300724	0.180895
WBGene00000120	aly-1	protein_coding	IV	9108931	9109753	209.091	-0.052368	0.188055	0.707347	0.859405	-0.0947184	0.252298
WBGene00000121	aly-2	protein_coding	IV	9147468	9148579	1414.16	-0.0875124	0.142972	0.471247	0.702303	-0.120621	0.167424
WBGene00000122	aly-3	protein_coding	IV	12123282	12124809	1432.74	0.101339	0.142632	0.403398	0.644158	0.1392	0.166594
WBGene00000123	ama-1	protein_coding	IV	4248070	4258169	4994.24	0.612826	0.15551	1.59463e-06	3.45966e-05	0.693972	0.144608	Up
WBGene00000133	amt-1	protein_coding	X	4571437	4573914	26.0944	1.84569	0.752815	0.000149194	0.0018582	2.46166	0.649102	Up
WBGene00000134	amt-2	protein_coding	IV	13042391	13047043	12.3727	-0.0245475	0.343773	0.869803	0.943856	-0.128585	0.784489
WBGene00000135	amt-3	protein_coding	II	8363172	8369159	42.4191	-0.270543	0.329742	0.120549	0.316493	-0.696689	0.448761
WBGene00000136	amt-4	protein_coding	X	4565302	4569620	404.678	-0.25753	0.160897	0.0484564	0.172236	-0.364112	0.184515
WBGene00000137	amx-1	protein_coding	III	3822403	3826260	262.115	0.00231696	0.168573	0.986129	0.993794	0.00370711	0.213229
WBGene00000138	amx-2	protein_coding	I	12759587	12764960	163.917	0.20873	0.208201	0.156228	0.372085	0.378081	0.266654
WBGene00000139	amx-3	protein_coding	V	20898840	20903714	43.4077	-0.153331	0.277426	0.324405	0.5729	-0.430542	0.436901
WBGene00000140	anc-1	protein_coding	I	4318033	4359092	5953.62	0.0203097	0.177166	0.881516	0.949991	0.0343129	0.230214
WBGene00000142	aos-1	protein_coding	V	10127492	10130295	881.876	0.0235677	0.154615	0.853208	0.936048	0.0347097	0.187593
WBGene00000143	apc-2	protein_coding	III	8080629	8083701	786.271	0.0478454	0.152423	0.704907	0.857451	0.0695117	0.183551
WBGene00000144	apc-10	protein_coding	V	10425362	10426353	220.435	-0.208965	0.199843	0.149322	0.36103	-0.363676	0.252215
WBGene00000145	apc-11	protein_coding	III	4593863	4594424	265.099	-0.423539	0.24149	0.00977078	0.0544272	-0.647692	0.250671
WBGene00000146	ape-1	protein_coding	V	11675938	11685274	2051.48	-0.0230254	0.124359	0.834587	0.928048	-0.0292827	0.140227
WBGene00000147	aph-1	protein_coding	I	9232068	9233560	271.826	-0.0283124	0.177226	0.835442	0.928117	-0.0478166	0.230189
WBGene00000148	aph-2	protein_coding	I	10340997	10345654	562.411	0.0833235	0.152597	0.509927	0.732956	0.120653	0.183099
WBGene00000149	apl-1	protein_coding	X	5112422	5116866	3435.98	-0.244341	0.167791	0.0675335	0.216199	-0.358014	0.195839
WBGene00000150	apm-1	protein_coding	I	5342180	5344724	371.628	-0.209168	0.16703	0.116467	0.309717	-0.311941	0.198716
WBGene00000151	apn-1	protein_coding	II	8047564	8049063	459.087	-0.0942927	0.160407	0.468519	0.700244	-0.142136	0.196079
WBGene00000155	app-1	protein_coding	I	4964667	4967089	1794.67	0.196547	0.144094	0.107204	0.294306	0.266206	0.165254
WBGene00000156	apr-1	protein_coding	I	8050037	8055475	1961.69	0.00914162	0.132421	0.936843	0.973092	0.0120433	0.151987
WBGene00000157	aps-2	protein_coding	X	4458272	4459255	140.62	0.097214	0.202899	0.497614	0.722237	0.190541	0.280932
WBGene00000158	apg-1	protein_coding	I	14406028	14417934	1534	0.189206	0.134469	0.104274	0.288827	0.246715	0.151874
WBGene00000159	aps-1	protein_coding	V	6017970	6018886	328.357	-0.224359	0.171791	0.0972888	0.275735	-0.338717	0.204275
WBGene00000160	apb-1	protein_coding	III	2583971	2597034	1678.11	0.228975	0.153456	0.0711615	0.224397	0.318739	0.176641
WBGene00000161	apa-2	protein_coding	X	9338675	9342900	882.767	0.0886193	0.14487	0.469413	0.700893	0.123269	0.170395
WBGene00000162	apd-3	protein_coding	II	3532527	3546431	1115.46	0.264613	0.135837	0.0237297	0.104609	0.339657	0.150192
WBGene00000163	apb-3	protein_coding	I	7853750	7857853	1206.91	-0.00586281	0.131317	0.959231	0.983649	-0.00768554	0.150349
WBGene00000164	apm-3	protein_coding	X	954975	957762	186.77	0.062878	0.192049	0.654602	0.828035	0.116513	0.260437
WBGene00000165	aps-3	protein_coding	I	1154514	1156020	967.899	-0.0849438	0.163529	0.517971	0.738693	-0.130577	0.201983
WBGene00000166	apt-9	protein_coding	X	11068527	11072047	49.5003	-0.241683	0.302128	0.147969	0.358881	-0.608017	0.420266
WBGene00000168	apx-1	protein_coding	V	3210196	3223221	1050.09	0.338959	0.155421	0.00784039	0.0462027	0.448197	0.168567
WBGene00000169	aqp-1	protein_coding	II	7235828	7238349	412.963	-0.00318237	0.285604	0.982758	0.992417	-0.0119703	0.55389
WBGene00000170	aqp-2	protein_coding	II	9259048	9261981	2575.63	-0.644064	0.26287	0.00042386	0.00449111	-0.825863	0.234303
WBGene00000171	aqp-3	protein_coding	IV	10961229	10966459	5.92421	-0.104729	0.463809	0.505359	0.728969	-0.82332	1.23606
WBGene00000172	aqp-4	protein_coding	V	9737556	9739740	170.95	0.542514	0.279896	0.00302948	0.0224225	0.781152	0.263482	Up
WBGene00000173	aqp-5	protein_coding	V	10491743	10493256	6.30996	0.00316145	0.400564	0.983184	0.99242	0.0225448	1.06962
WBGene00000174	aqp-6	protein_coding	V	10648446	10651997	13.3316	-0.00528069	0.332479	0.971731	0.988393	-0.026281	0.74162
WBGene00000175	aqp-7	protein_coding	X	3025063	3026974	1139.83	0.283387	0.179037	0.0408042	0.153167	0.42173	0.206173
WBGene00000176	aqp-8	protein_coding	X	4702167	4704977	461.98	-0.371332	0.18818	0.00930145	0.0523977	-0.526483	0.202434
WBGene00000177	aqp-9	protein_coding	I	9605896	9609047	47.3151	-0.174874	0.279084	0.267354	0.51266	-0.470578	0.424259
WBGene00000178	aqp-10	protein_coding	II	9768458	9769847	424.167	-0.243164	0.169541	0.0704474	0.222716	-0.359156	0.198536
WBGene00000179	aqp-11	protein_coding	III	13673280	13674739	244.633	0.233946	0.184742	0.0956173	0.272673	0.371242	0.22277
WBGene00000180	arc-1	protein_coding	II	9674978	9677210	168.745	0.0615878	0.185654	0.657515	0.829489	0.109303	0.24654
WBGene00000181	ard-1	protein_coding	IV	11131279	11133805	1217.61	0.0776158	0.139877	0.516874	0.73773	0.105513	0.162786
WBGene00000182	arf-1	protein_coding	III	5714886	5717586	2755.46	0.3249	0.127207	0.00348682	0.0252045	0.397495	0.136072
WBGene00000183	arf-5	protein_coding	IV	7982526	7983852	2372.73	0.235263	0.134167	0.0427986	0.15819	0.302892	0.149527
WBGene00000184	arf-6	protein_coding	IV	16947120	16949564	325.188	-0.0541369	0.162794	0.679482	0.843573	-0.0833174	0.201654
WBGene00000185	arg-1	protein_coding	X	1786907	1788405	1.29037	-0.0664396	0.601609	0.614625	NA	-1.31882	2.61939
WBGene00000186	ark-1	protein_coding	IV	12622091	12631022	959.372	0.0114589	0.156873	0.928896	0.969077	0.0170987	0.191617
WBGene00000187	arl-1	protein_coding	II	8582000	8583080	312.31	0.0203049	0.184976	0.883489	0.950882	0.0361654	0.246782
WBGene00000188	arl-3	protein_coding	II	14606472	14608342	71.2483	-0.723777	0.439258	0.00384956	0.0272036	-1.12172	0.388108
WBGene00000189	arl-5	protein_coding	III	9823242	9824132	146.065	-0.155555	0.223323	0.295611	0.544511	-0.325936	0.311635
WBGene00000190	warf-1	protein_coding	IV	7634786	7635712	5.2516	0.004099	0.435123	0.978042	0.990655	0.034986	1.27111
WBGene00000191	arl-7	pseudogene	X	14980954	14981675	6.07348	-0.0539556	0.421275	0.72261	0.868468	-0.402477	1.13382
WBGene00000192	arl-8	protein_coding	IV	14798149	14799227	1052.79	0.0262471	0.135243	0.822594	0.923217	0.0350185	0.156186
WBGene00000193	arl-6	protein_coding	III	4812481	4814830	14.0351	-0.120741	0.391149	0.450004	0.685061	-0.637707	0.844189
WBGene00000195	arr-1	protein_coding	X	950782	954233	234.137	-0.194768	0.187222	0.166577	0.38673	-0.322977	0.233485
WBGene00000196	aars-1	protein_coding	II	11460205	11464497	363.221	0.316029	0.177352	0.0219684	0.0991047	0.455179	0.198689
WBGene00000197	aars-2	protein_coding	I	3983183	3986581	3429.06	0.611216	0.152579	1.20593e-06	2.70512e-05	0.690096	0.142151	Up
WBGene00000198	art-1	protein_coding	II	6970745	6972235	1554.68	0.437925	0.167639	0.00101925	0.00934608	0.559731	0.170382
WBGene00000199	arx-1	protein_coding	I	2883549	2893718	941.058	0.224025	0.137596	0.0581239	0.195588	0.293138	0.15471
WBGene00000200	arx-2	protein_coding	V	10335463	10338355	1066.39	0.0438218	0.131353	0.702446	0.856193	0.0574048	0.150266
WBGene00000201	arx-3	protein_coding	III	12052424	12058458	897.654	0.203491	0.139067	0.0876768	0.25765	0.269382	0.157738
WBGene00000202	exos-4.2	protein_coding	III	860198	862198	589.673	-0.00529101	0.155168	0.966932	0.986055	-0.00782046	0.188644
WBGene00000203	arx-5	protein_coding	III	12816789	12818100	381.212	0.0499161	0.159605	0.70025	0.855419	0.075458	0.196004
WBGene00000204	arx-6	protein_coding	III	4878658	4879643	392.588	-0.0565474	0.158833	0.66193	0.83281	-0.0850407	0.19449
WBGene00000205	arx-7	protein_coding	I	3069325	3070150	309.781	0.127539	0.172408	0.344992	0.592175	0.20353	0.215524
WBGene00000206	asb-1	protein_coding	III	4594543	4595821	1829.46	-0.0791078	0.148151	0.524229	0.742923	-0.112002	0.175871
WBGene00000207	asb-2	protein_coding	X	4469766	4471476	3095.22	0.398375	0.167308	0.00278891	0.0210581	0.523215	0.174983
WBGene00000208	trip-4	protein_coding	II	15039404	15048904	474.43	-0.107696	0.15111	0.3917	0.632882	-0.154096	0.179905
WBGene00000209	asg-1	protein_coding	I	8692946	8693468	1041.45	-0.0257422	0.145042	0.833664	0.927899	-0.0360253	0.171545
WBGene00000210	asg-2	protein_coding	X	6841258	6842121	904.97	0.101465	0.154171	0.425148	0.663759	0.147674	0.185166
WBGene00000211	asm-1	protein_coding	II	6910072	6912659	127.556	-1.07338	0.375436	9.55625e-05	0.00127326	-1.2831	0.328866
WBGene00000212	asm-2	protein_coding	X	11321079	11324251	169.359	-0.249136	0.199397	0.0869787	0.256685	-0.414692	0.24229
WBGene00000213	asm-3	protein_coding	IV	520214	523809	261.697	-1.86772	0.270832	2.5547e-13	1.49692e-11	-1.96668	0.268818		Down
WBGene00000214	asp-1	protein_coding	V	19049562	19050752	29594.6	-0.484398	0.135116	2.41125e-05	0.000385327	-0.564805	0.133746
WBGene00000215	asp-2	protein_coding	V	9203077	9204734	5486.33	-0.0361814	0.12524	0.744092	0.881952	-0.0461703	0.141436
WBGene00000216	asp-3	protein_coding	X	6791064	6792709	11941.7	-0.386929	0.142184	0.00123913	0.010972	-0.480345	0.148727
WBGene00000217	asp-4	protein_coding	X	13218985	13221462	2972.16	0.150229	0.143087	0.216347	0.453934	0.205006	0.165822
WBGene00000218	asp-5	protein_coding	V	8272385	8274044	7199.8	-0.488857	0.138988	2.96768e-05	0.000460109	-0.572806	0.137168
WBGene00000219	asp-6	protein_coding	V	8267511	8268937	23052.5	-1.47951	0.16811	1.98036e-19	2.12737e-17	-1.51925	0.168537		Down
WBGene00000220	atf-2	protein_coding	II	8751986	8753940	180.367	-0.100773	0.365383	0.519219	0.739576	-0.503185	0.780676
WBGene00000222	atf-6	protein_coding	X	12480948	12484904	225.092	-0.0454321	0.175353	0.737828	0.879041	-0.0756219	0.225919
WBGene00000223	atf-7	protein_coding	III	4491627	4499045	2521.56	0.0029118	0.135788	0.98021	0.991556	0.00389619	0.157072
WBGene00000224	atgp-1	protein_coding	IV	17269342	17272181	589.295	-0.316493	0.203059	0.0324235	0.130736	-0.495791	0.23177
WBGene00000225	atgp-2	protein_coding	II	14640098	14644083	435.91	0.169774	0.181726	0.220887	0.459916	0.278779	0.227729
WBGene00000226	atl-1	protein_coding	V	9634849	9645595	1942.77	0.136358	0.157145	0.289278	0.538488	0.199834	0.188575
WBGene00000227	atm-1	protein_coding	I	183364	208384	1626.9	0.0934986	0.137043	0.42859	0.665432	0.125229	0.158196
WBGene00000228	atn-1	protein_coding	V	12478411	12484449	1648.28	0.297504	0.140178	0.0126949	0.066009	0.382823	0.153607
WBGene00000229	atp-2	protein_coding	III	5228417	5230536	22592.4	0.318164	0.139736	0.00748727	0.0446666	0.40526	0.151536
WBGene00000230	atp-3	protein_coding	I	5428533	5429908	3672.02	0.13082	0.130324	0.251264	0.495766	0.169376	0.147632
WBGene00000231	atx-2	protein_coding	III	10461389	10468051	3701.62	0.558601	0.159518	1.54941e-05	0.000261087	0.653153	0.151139	Up
WBGene00000232	avr-14	protein_coding	I	5967247	5973326	151.082	-0.547331	0.294593	0.00367375	0.026211	-0.804314	0.276882		Down
WBGene00000233	avr-15	protein_coding	V	13498780	13511718	146.316	-0.89457	0.297944	5.17122e-05	0.000743436	-1.04892	0.259136		Down
WBGene00000235	baf-1	protein_coding	III	9467464	9468058	650.279	0.152393	0.165478	0.249759	0.494011	0.231844	0.20144
WBGene00000236	bag-1	protein_coding	I	6563629	6564451	417.242	-0.0868974	0.166252	0.511976	0.734339	-0.135632	0.20683
WBGene00000237	bam-2	protein_coding	I	2949601	2957910	450.797	-0.103752	0.18389	0.454577	0.688968	-0.179111	0.239515
WBGene00000238	bar-1	protein_coding	X	7166005	7170625	175.018	0.136034	0.203074	0.345362	0.592439	0.258764	0.274223
WBGene00000239	bas-1	protein_coding	III	5612274	5614660	211.783	0.260762	0.189655	0.0671423	0.215393	0.412341	0.225234
WBGene00000240	pah-1	protein_coding	II	8762622	8766997	826.275	-0.612403	0.190649	3.24088e-05	0.000497353	-0.726199	0.174742
WBGene00000241	bbs-1	protein_coding	I	14371138	14376086	31.7554	-0.317294	0.384679	0.0917831	0.265424	-0.857302	0.508463
WBGene00000242	bbs-2	protein_coding	IV	7934033	7937749	28.0001	-0.886582	0.615775	0.00474681	0.0315685	-1.53972	0.545277		Down
WBGene00000244	bbs-8	protein_coding	V	6762467	6765072	29.6437	-0.18467	0.332377	0.261398	0.506119	-0.610556	0.543638
WBGene00000245	bca-1	protein_coding	X	6201875	6204746	214.954	0.443045	0.273872	0.0115112	0.0618074	0.709788	0.280906
WBGene00000246	bcc-1	protein_coding	IV	11086074	11092552	55.1087	-0.148298	0.258114	0.332861	0.580226	-0.380955	0.393399
WBGene00000247	bec-1	protein_coding	IV	5661141	5664425	398.486	-0.0258419	0.16127	0.842855	0.931543	-0.039527	0.199386
WBGene00000248	ben-1	protein_coding	III	3537642	3541639	633.687	0.0274596	0.153384	0.828543	0.926103	0.0401602	0.185437
WBGene00000249	bir-1	protein_coding	V	11644477	11645370	306.961	-0.173914	0.175758	0.202925	0.437377	-0.276107	0.21685
WBGene00000250	bir-2	protein_coding	V	13568850	13570030	359.467	0.0745371	0.17288	0.580793	0.782056	0.12141	0.219856
WBGene00000251	bli-1	protein_coding	II	10708960	10712156	54.5819	0.646548	0.482714	0.0099079	0.0549929	1.17036	0.453801
WBGene00000252	bli-2	protein_coding	II	5651394	5652434	20.4129	0.534901	0.583903	0.0319716	0.1294	1.42294	0.663448
WBGene00000253	bli-3	protein_coding	I	145968	154855	438.712	0.162873	0.174054	0.230656	0.471586	0.257892	0.215148
WBGene00000254	bli-4	protein_coding	I	6342224	6356680	2871.68	0.311632	0.139651	0.00880635	0.05051	0.397951	0.15192
WBGene00000255	bli-5	protein_coding	III	13427640	13429768	8.32518	0.801809	0.945449	0.0147649	0.074083	2.5666	1.05271
WBGene00000256	bli-6	protein_coding	IV	6377065	6378168	110.426	1.18597	0.48738	0.000307182	0.00344833	1.52026	0.421221	Up
WBGene00000257	bmk-1	protein_coding	V	14453302	14456984	1123.4	0.155877	0.13322	0.178194	0.403835	0.203528	0.151172
WBGene00000259	bpl-1	protein_coding	II	6274216	6279714	479.573	-0.147067	0.157602	0.253906	0.498387	-0.215323	0.188728
WBGene00000262	bra-1	protein_coding	X	13598449	13599687	60.0344	-0.41707	0.342063	0.0295229	0.122339	-0.810378	0.372342
WBGene00000263	F23H11.5	protein_coding	III	909957	910590	1444.21	-0.0640074	0.1299	0.573819	0.776609	-0.0832283	0.147978
WBGene00000264	brc-1	protein_coding	III	3853102	3862968	466.671	-0.0548556	0.151385	0.662888	0.833608	-0.0792029	0.181687
WBGene00000265	brd-1	protein_coding	III	6885207	6889504	478.624	0.0157853	0.157738	0.902463	0.958541	0.0236677	0.193126
WBGene00000266	bre-1	protein_coding	IV	8987266	8990444	309.801	0.0426879	0.179261	0.755304	0.887646	0.0729204	0.23398
WBGene00000267	bre-2	protein_coding	III	13133906	13139626	38.7161	-0.420828	0.423979	0.0434499	0.159734	-0.985005	0.487781
WBGene00000268	bre-3	protein_coding	III	9469900	9485473	734.491	0.0944747	0.140837	0.432205	0.668578	0.128781	0.163964
WBGene00000269	bre-4	protein_coding	I	1621314	1628486	194.722	0.235679	0.195838	0.102153	0.284823	0.391883	0.239756
WBGene00000270	bre-5	protein_coding	IV	12049850	12051215	151.127	-0.122627	0.202337	0.393503	0.634918	-0.234889	0.275277
WBGene00000271	brf-1	protein_coding	II	7305858	7308792	970.619	0.0770272	0.139989	0.520279	0.740252	0.104775	0.162969
WBGene00000272	bro-1	protein_coding	I	5186926	5189240	16.0369	-0.214251	0.442939	0.227105	0.467041	-0.984501	0.815085
WBGene00000273	brp-1	protein_coding	III	12020552	12025321	3846.3	-0.732408	0.190537	1.62212e-06	3.50945e-05	-0.820109	0.171014		Down
WBGene00000274	btf-1	protein_coding	II	13200165	13215706	1158.41	0.392774	0.150123	0.0015727	0.0132868	0.495893	0.156882
WBGene00000275	bub-1	protein_coding	I	7251941	7255223	2073.71	0.234608	0.132737	0.041822	0.155703	0.30051	0.14765
WBGene00000276	byn-1	protein_coding	III	6932001	6935862	1089.45	-0.052003	0.132959	0.653074	0.827116	-0.0685888	0.15259
WBGene00000277	cab-1	protein_coding	X	12199655	12212901	1644.16	-0.499189	0.174573	0.00026784	0.00309426	-0.620131	0.170152		Down
WBGene00000279	cah-1	protein_coding	III	5083206	5085629	56.5838	-0.176822	0.268589	0.258676	0.503517	-0.450957	0.399244
WBGene00000280	cah-2	protein_coding	II	7480751	7483109	42.7931	-0.488053	0.42564	0.0248717	0.1085	-1.00506	0.44801
WBGene00000281	cah-3	protein_coding	X	16487481	16489397	505.941	-0.201767	0.151463	0.109073	0.297312	-0.281599	0.175738
WBGene00000282	cah-4	protein_coding	X	13542574	13544599	782.555	-0.358124	0.176092	0.00917618	0.0519068	-0.496501	0.190565
WBGene00000283	cah-5	protein_coding	X	7020033	7023950	268.041	0.171071	0.177338	0.212279	0.448528	0.274289	0.219902
WBGene00000284	cah-6	protein_coding	I	3628246	3631112	146.914	-0.249183	0.222333	0.101398	0.283458	-0.455515	0.278073
WBGene00000285	cal-1	protein_coding	V	12514835	12517248	53.0348	-0.132993	0.258168	0.38184	0.623791	-0.352215	0.402756
WBGene00000286	cal-2	protein_coding	II	8960714	8961569	117.237	-0.494179	0.341186	0.0127739	0.0661974	-0.846616	0.340005
WBGene00000287	cal-3	protein_coding	IV	3829493	3835165	27.9067	-0.138959	0.301922	0.374586	0.617988	-0.456706	0.514357
WBGene00000288	cal-4	protein_coding	IV	10521406	10530598	124.445	-0.778242	0.342091	0.000574314	0.00578401	-1.01181	0.293835		Down
WBGene00000289	cam-1	protein_coding	II	9295915	9310304	1315.87	-0.20304	0.148881	0.103137	0.286795	-0.280091	0.171853
WBGene00000292	cap-1	protein_coding	IV	7228422	7230223	894.401	-0.171672	0.141073	0.153798	0.368385	-0.231051	0.162
WBGene00000293	cap-2	protein_coding	II	10869196	10870827	1081.13	-0.182094	0.140411	0.129071	0.329811	-0.243764	0.160606
WBGene00000294	cas-1	protein_coding	X	16807455	16813656	950.159	0.133665	0.148009	0.281684	0.529557	0.187331	0.174012
WBGene00000295	cat-1	protein_coding	X	5705690	5710737	40.2066	-0.317686	0.368243	0.087257	0.257042	-0.817251	0.477911
WBGene00000296	cat-2	protein_coding	II	257819	261074	20.2685	0.493664	0.551842	0.0382868	0.146381	1.33415	0.643964
WBGene00000298	cat-4	protein_coding	V	10564880	10566464	323.194	-0.450867	0.229019	0.00491368	0.032455	-0.650224	0.231179		Down
WBGene00000301	cav-1	protein_coding	IV	9772510	9773559	637.608	-1.08341	0.588249	0.00142101	0.012212	-1.596	0.500258		Down
WBGene00000302	cav-2	protein_coding	V	13557104	13559922	69.7434	-1.63958	0.370925	5.14437e-07	1.22806e-05	-1.82543	0.36357		Down
WBGene00000308	C04A11.t1	tRNA	X	13665555	13665673	4.70607	-0.312695	0.654786	0.120702	NA	-2.0021	1.29015
WBGene00000366	cbp-1	protein_coding	III	9766509	9774825	5514.78	0.0273813	0.156672	0.831039	0.926559	0.0407851	0.191148
WBGene00000367	cca-1	protein_coding	X	7847678	7875954	453.994	-0.184458	0.183758	0.186154	0.414452	-0.302993	0.229185
WBGene00000368	ccb-1	protein_coding	I	3641651	3647082	315.594	-0.160907	0.191611	0.256107	0.500944	-0.280526	0.24702
WBGene00000369	ccf-1	protein_coding	III	11918828	11920237	1233.3	0.226021	0.142719	0.0621437	0.205099	0.301563	0.161673
WBGene00000370	ccg-1	protein_coding	IV	15270160	15275804	715.925	-0.198169	0.146176	0.107563	0.294954	-0.270659	0.16819
WBGene00000371	cox-5B	protein_coding	I	9788725	9790050	1859.48	-0.188286	0.127953	0.0939835	0.269527	-0.239336	0.142909
WBGene00000372	cyp-13A7	protein_coding	II	9803620	9805513	15.897	0.425474	0.566452	0.0606142	0.201556	1.41268	0.75291
WBGene00000373	cyp-14A5	protein_coding	V	5421018	5423282	159.078	0.0019518	0.196167	0.988967	0.995092	0.0037704	0.272647
WBGene00000374	cyp-31A1	pseudogene	IV	9101773	9103851	126.239	0.220222	0.215447	0.14047	0.347789	0.406648	0.275873
WBGene00000375	cyp-44A1	protein_coding	II	5504044	5505975	366.321	-0.0185749	0.164744	0.887912	0.952571	-0.0290163	0.205868
WBGene00000376	ccr-4	protein_coding	IV	12361542	12371852	3681.57	0.225487	0.120297	0.0355343	0.138984	0.276867	0.131702
WBGene00000377	cct-1	protein_coding	II	8185443	8187601	3838.5	0.446984	0.138368	0.000133033	0.00168956	0.533845	0.139722
WBGene00000378	cct-2	protein_coding	II	8927741	8929815	3402.93	0.366397	0.129353	0.00109336	0.00989767	0.444142	0.136017
WBGene00000379	cct-4	protein_coding	II	8283667	8285711	3313.06	0.249632	0.127464	0.0256747	0.110719	0.312557	0.140091
WBGene00000380	cct-5	protein_coding	III	4499188	4508114	4979.38	0.364794	0.126839	0.000974521	0.00898918	0.43958	0.133296
WBGene00000381	cct-6	protein_coding	III	5853530	5855687	3288.32	0.333037	0.127844	0.00283316	0.0212944	0.407057	0.136355
WBGene00000382	cdc-6	protein_coding	I	4268070	4270287	754.727	0.08252	0.145399	0.50152	0.725852	0.115175	0.171366
WBGene00000383	cdc-14	protein_coding	II	5589038	5593427	1618.87	-0.459602	0.150492	0.000210197	0.0025117	-0.558942	0.150803
WBGene00000386	cdc-25.1	protein_coding	I	6469386	6471922	1985.25	0.0680712	0.13293	0.556201	0.76472	0.089684	0.152396
WBGene00000387	cdc-25.2	protein_coding	V	1567076	1585532	534.396	0.0292544	0.166323	0.825157	0.924418	0.0461065	0.208705
WBGene00000388	cdc-25.3	protein_coding	III	8916351	8917929	327.177	0.0611938	0.169581	0.647244	0.823976	0.0979654	0.214088
WBGene00000389	cdc-25.4	protein_coding	II	10188258	10189469	3.85338	0.0955608	0.503194	0.532647	NA	0.945493	1.51529
WBGene00000390	cdc-42	protein_coding	II	7616452	7618245	1878.95	0.115288	0.125553	0.298976	0.547611	0.146606	0.141153
WBGene00000391	cdd-1	protein_coding	X	8208748	8211149	101.024	-0.0675278	0.214411	0.640584	0.819266	-0.146413	0.313597
WBGene00000392	cdd-2	protein_coding	IV	7547118	7547893	260.291	0.105884	0.171353	0.431326	0.667887	0.169323	0.21517
WBGene00000393	cdf-1	protein_coding	X	6499916	6505143	269.929	0.142691	0.179026	0.29946	0.548152	0.23467	0.226168
WBGene00000395	cdh-3	protein_coding	III	7741229	7754448	532.484	-0.185101	0.320385	0.256906	0.501777	-0.581464	0.512875
WBGene00000396	cdh-4	protein_coding	III	4520357	4536994	4026.27	-0.135425	0.171175	0.314459	0.563641	-0.213922	0.212666
WBGene00000397	cdh-5	protein_coding	IV	8668935	8676619	297.324	0.159955	0.364797	0.329188	0.576734	0.656184	0.672491
WBGene00000399	cdh-7	protein_coding	II	14843229	14850905	231.771	3.81836	0.322544	1.04678e-33	3.17502e-31	3.89937	0.322243
WBGene00000401	cdh-9	protein_coding	X	16595231	16602245	92.5491	-0.0490618	0.247292	0.738284	0.879121	-0.137474	0.411445
WBGene00000402	cdh-10	protein_coding	IV	2436498	2463369	283.218	2.95286	0.952095	1.18862e-05	0.000208703	3.68528	0.841453	Up
WBGene00000403	casy-1	protein_coding	II	5945405	5956683	1923.62	-0.575025	0.17589	3.33225e-05	0.000509515	-0.682512	0.164481
WBGene00000405	cdk-1	protein_coding	III	9747472	9748852	1539.38	0.175957	0.142981	0.147325	0.357765	0.238543	0.164621
WBGene00000406	cdk-4	protein_coding	X	13515856	13518911	114.992	0.0302957	0.211274	0.833012	0.927574	0.0653259	0.309836
WBGene00000407	cdk-5	protein_coding	III	13464687	13466342	407.123	-0.0909037	0.15831	0.481481	0.709889	-0.135552	0.192567
WBGene00000408	cdk-7	protein_coding	I	2281503	2291205	533.546	-0.152552	0.161536	0.243143	0.486082	-0.227414	0.194843
WBGene00000409	cdk-8	protein_coding	I	8702466	8705825	618.31	0.0947376	0.149795	0.448749	0.683978	0.134958	0.178161
WBGene00000410	cdk-9	protein_coding	I	11323527	11333154	508.25	0.127542	0.14917	0.306646	0.556034	0.180001	0.176077
WBGene00000411	cdl-1	protein_coding	II	10785452	10787272	1809.42	0.21798	0.13625	0.0634793	0.207868	0.284227	0.153155
WBGene00000412	cdr-1	protein_coding	V	15921309	15922820	31.9017	0.738563	0.547832	0.00781315	0.0460776	1.3379	0.502964	Up
WBGene00000413	cdt-1	protein_coding	I	3223160	3228104	677.74	-0.0160643	0.1423	0.894464	0.95535	-0.0221791	0.16719
WBGene00000414	cec-1	protein_coding	III	8426333	8428583	342.604	-0.467674	0.213625	0.00248831	0.0193139	-0.642362	0.212368		Down
WBGene00000415	ced-1	protein_coding	I	11851554	11868105	1518.72	-0.0653048	0.126908	0.559516	0.767012	-0.0838239	0.143642
WBGene00000416	ced-2	protein_coding	IV	1597318	1601621	586.259	0.198011	0.150541	0.114465	0.306555	0.275621	0.174616
WBGene00000417	ced-3	protein_coding	IV	13198261	13204137	1433.93	0.207331	0.132724	0.0722976	0.226942	0.267388	0.148777
WBGene00000418	ced-4	protein_coding	III	4852325	4855171	442.216	-0.0817671	0.159074	0.527671	0.745573	-0.122657	0.194211
WBGene00000419	ced-5	protein_coding	IV	10484110	10492913	1719.11	0.0760286	0.14178	0.529145	0.746776	0.104321	0.16577
WBGene00000420	ced-6	protein_coding	III	5595771	5598061	650.939	-0.014248	0.14391	0.907007	0.960168	-0.0198318	0.169772
WBGene00000421	ced-7	protein_coding	III	9570390	9580089	2932.58	0.165161	0.139755	0.167388	0.387855	0.221348	0.160322
WBGene00000422	ced-8	protein_coding	X	8414006	8416919	42.6625	-0.112792	0.273164	0.457729	0.691062	-0.338916	0.456396
WBGene00000423	ced-9	protein_coding	III	10335172	10337522	776.862	0.0631959	0.144026	0.604578	0.797426	0.0877812	0.169518
WBGene00000424	ced-10	protein_coding	IV	3506328	3509527	629.89	0.0682974	0.146208	0.579344	0.781264	0.0958653	0.172935
WBGene00000425	ced-11	protein_coding	III	9119556	9125162	158.299	-0.167441	0.209158	0.252454	0.497184	-0.319602	0.279272
WBGene00000426	ced-12	protein_coding	I	10222881	10227009	700.198	-0.0996458	0.149657	0.425348	0.663759	-0.141735	0.177795
WBGene00000428	ceh-1	protein_coding	X	4653167	4654157	3.84493	-0.0803911	0.479509	0.597854	NA	-0.747039	1.41622
WBGene00000429	ceh-2	protein_coding	I	6046788	6050451	12.0685	-0.0365287	0.34521	0.807952	0.91515	-0.190279	0.78282
WBGene00000430	ceh-5	protein_coding	I	9727169	9728034	11.6121	0.0336718	0.362127	0.823107	0.923351	0.192445	0.860856
WBGene00000431	ceh-6	protein_coding	I	8498112	8502604	53.0835	-0.170338	0.275667	0.277535	0.524776	-0.455862	0.419811
WBGene00000433	ceh-8	protein_coding	I	8245505	8250948	12.9221	-1.28383	0.962484	0.00280029	0.0210997	-2.49056	0.833283		Down
WBGene00000434	ceh-9	protein_coding	I	565284	566588	4.35163	-0.0820186	0.465469	0.593202	NA	-0.706111	1.32181
WBGene00000435	ceh-10	protein_coding	III	5799047	5801115	23.9838	-0.171404	0.337962	0.293907	0.542729	-0.604181	0.575636
WBGene00000437	ceh-13	protein_coding	III	7555660	7558041	104.101	-0.302869	0.264208	0.0660699	0.213013	-0.589061	0.320499
WBGene00000438	ceh-14	protein_coding	X	7527769	7532732	59.5716	-0.344989	0.351777	0.0639583	0.208772	-0.793862	0.428542
WBGene00000439	ceh-16	protein_coding	III	8622735	8626314	21.8609	-0.142647	0.326996	0.369407	0.614182	-0.52288	0.582541
WBGene00000440	ceh-17	protein_coding	I	4568765	4570027	9.6264	-0.192038	0.443756	0.26782	0.51318	-0.966746	0.872438
WBGene00000441	ceh-18	protein_coding	X	3843367	3857797	346.558	-0.12792	0.1764	0.348693	0.59581	-0.208798	0.222807
WBGene00000442	ceh-19	protein_coding	IV	7953500	7955949	11.1857	-0.303913	0.529219	0.127142	0.326812	-1.33977	0.878268
WBGene00000443	ceh-20	protein_coding	III	6979884	6981785	274.369	-0.155407	0.193597	0.274324	0.521061	-0.275158	0.251709
WBGene00000444	ceh-21	protein_coding	X	1848779	1852736	203.135	0.245836	0.193019	0.0865044	0.255858	0.399822	0.23325
WBGene00000445	ceh-22	protein_coding	V	10671918	10675769	37.6245	-0.160602	0.289515	0.307842	0.557085	-0.469961	0.460854
WBGene00000446	ceh-23	protein_coding	III	7839592	7841491	18.788	-0.0364627	0.316724	0.806919	0.914449	-0.162394	0.664451
WBGene00000447	ceh-24	protein_coding	V	13813231	13815350	20.9864	-0.395661	0.513221	0.067497	0.216199	-1.23803	0.677128
WBGene00000448	pros-1	protein_coding	III	8067289	8071463	164.201	-0.794519	0.323353	0.000316934	0.00355522	-1.00032	0.277786		Down
WBGene00000449	ceh-27	protein_coding	V	11661549	11665102	65.272	-0.485266	0.354913	0.0158866	0.078115	-0.866023	0.359121
WBGene00000451	ceh-30	protein_coding	X	3063574	3065551	15.4004	-0.257474	0.468308	0.168223	0.389221	-1.09977	0.79813
WBGene00000452	ceh-31	protein_coding	X	3068648	3070422	19.5718	-0.0193554	0.309065	0.896182	0.956363	-0.0837516	0.641844
WBGene00000453	ceh-32	protein_coding	V	11701764	11705400	250.73	-0.83311	0.296437	9.63678e-05	0.00128178	-0.998781	0.256127		Down
WBGene00000454	ceh-33	protein_coding	V	5323194	5324666	13.1996	-0.258095	0.460831	0.166481	0.386619	-1.07161	0.774512
WBGene00000455	ceh-34	protein_coding	V	5315496	5319577	71.1391	-0.650442	0.426442	0.00623756	0.0389539	-1.06455	0.389228		Down
WBGene00000457	ceh-36	protein_coding	X	14183221	14186566	16.536	-0.568014	0.658613	0.0306888	0.125489	-1.66012	0.768189
WBGene00000458	ceh-37	protein_coding	X	14197372	14208000	85.3203	-0.203232	0.247865	0.190782	0.420879	-0.446424	0.341232
WBGene00000459	ceh-38	protein_coding	II	6951526	6955409	1365.5	-0.0621088	0.13931	0.603018	0.796781	-0.0843171	0.162128
WBGene00000460	ceh-39	protein_coding	X	1853874	1856172	261.987	0.150314	0.177468	0.272699	0.519249	0.244064	0.22251
WBGene00000461	ceh-40	protein_coding	X	12318126	12320777	41.0263	0.0383233	0.261176	0.794424	0.907794	0.119783	0.459695
WBGene00000462	ceh-41	protein_coding	X	1846608	1848675	84.1872	0.135666	0.239037	0.366186	0.611455	0.320363	0.354525
WBGene00000463	ceh-43	protein_coding	III	4446638	4449943	109.025	-0.80286	0.419317	0.00162926	0.0136602	-1.1346	0.360119		Down
WBGene00000464	ceh-44	protein_coding	III	2530620	2543068	425.691	-0.276191	0.1895	0.0526834	0.183096	-0.430137	0.222005
WBGene00000465	cpg-1	protein_coding	III	4489359	4491392	17900.1	0.598648	0.149824	1.38736e-06	3.05714e-05	0.677285	0.140317	Up
WBGene00000466	cel-1	protein_coding	I	9665251	9668650	659.431	-0.062703	0.145383	0.609526	0.799928	-0.0876944	0.171697
WBGene00000467	cep-1	protein_coding	I	8324286	8328859	564.105	0.0203902	0.162001	0.87599	0.947367	0.031332	0.200775
WBGene00000468	ces-1	protein_coding	I	8633897	8636169	9.00742	-0.0765872	0.39253	0.619872	0.807949	-0.467926	0.94334
WBGene00000469	ces-2	protein_coding	I	14961497	14965361	49.6141	-2.20283	0.633163	6.74537e-06	0.00012602	-2.62806	0.583809		Down
WBGene00000472	cey-1	protein_coding	II	11039348	11041206	4668.61	-0.0773855	0.151819	0.539309	0.753551	-0.111694	0.181953
WBGene00000473	cey-2	protein_coding	I	5619569	5620669	12304.2	0.163712	0.12556	0.14002	0.34725	0.207	0.140271
WBGene00000474	cey-3	protein_coding	I	5571796	5572949	4887.82	0.0449581	0.162181	0.730978	0.874313	0.0690211	0.200745
WBGene00000475	cey-4	protein_coding	III	10866946	10868703	4579.06	0.349157	0.125394	0.00147785	0.0126303	0.421486	0.132585
WBGene00000476	cfi-1	protein_coding	I	9993906	9999928	184.211	-0.440374	0.280779	0.0129987	0.0672049	-0.718739	0.28937
WBGene00000477	cft-1	protein_coding	V	5538800	5545789	86.5882	0.053824	0.215825	0.709638	0.860972	0.118922	0.319389
WBGene00000478	cfz-2	protein_coding	V	3441504	3444877	193.893	-0.952129	0.338819	0.000103018	0.0013505	-1.13923	0.293362		Down
WBGene00000479	cgh-1	protein_coding	III	7495320	7497832	16360.3	0.114746	0.126314	0.3034	0.552803	0.146378	0.14223
WBGene00000480	cgp-1	protein_coding	V	118202	122789	1477.81	0.306548	0.135253	0.00844278	0.0489424	0.386849	0.146877
WBGene00000481	cha-1	protein_coding	IV	3613931	3624697	98.0188	-0.434048	0.301208	0.0175542	0.0842004	-0.747644	0.314812
WBGene00000482	chd-3	protein_coding	X	12846439	12852601	1159.41	0.0488161	0.145476	0.69101	0.850013	0.0683822	0.172037
WBGene00000483	che-1	protein_coding	I	6517529	6520918	1.7767	0.0193526	0.524568	0.890443	NA	0.268698	1.95071
WBGene00000484	che-2	protein_coding	X	481450	486504	33.2505	-0.518941	0.502001	0.027665	0.116833	-1.19026	0.540534
WBGene00000485	che-3	protein_coding	I	8062007	8081671	275.705	-0.231965	0.226898	0.128445	0.328905	-0.44304	0.291424
WBGene00000487	che-6	protein_coding	IV	2104056	2111408	6.1781	-0.483588	0.794208	0.0499535	0.176342	-2.40525	1.22694
WBGene00000488	che-7	protein_coding	V	7961210	7969207	49.1814	-0.422133	0.389038	0.0367751	0.142316	-0.906578	0.434133
WBGene00000490	che-11	protein_coding	V	12144244	12150707	66.4282	-0.688998	0.460659	0.00612914	0.0384008	-1.14335	0.417161		Down
WBGene00000491	che-12	protein_coding	V	10299472	10307383	92.2014	-0.787895	0.387193	0.00117566	0.0104988	-1.07833	0.332333		Down
WBGene00000492	che-13	protein_coding	I	10506998	10515586	22.914	-0.457612	0.526974	0.0456746	0.165519	-1.26589	0.633456
WBGene00000493	che-14	protein_coding	I	5746633	5754306	77.7304	0.636393	0.452731	0.00869662	0.0500663	1.10717	0.421979
WBGene00000496	chs-1	protein_coding	I	7554855	7559916	5691.59	0.178118	0.132266	0.121917	0.318777	0.230728	0.149167
WBGene00000497	chs-2	protein_coding	II	196985	211941	414.789	0.364621	0.462595	0.0760621	0.235227	1.08198	0.609908
WBGene00000498	chk-1	protein_coding	V	3757153	3759469	845.835	0.265826	0.160864	0.0416181	0.15513	0.373999	0.183574
WBGene00000499	chk-2	protein_coding	V	19908086	19916023	447.514	0.299578	0.176593	0.0294457	0.122084	0.436157	0.200304
WBGene00000500	chn-1	protein_coding	I	6181314	6183856	514.991	-0.132985	0.172943	0.325606	0.573874	-0.212366	0.216038
WBGene00000501	cho-1	protein_coding	IV	13209730	13214566	106.846	-0.430559	0.28054	0.0147953	0.0741636	-0.712086	0.292156
WBGene00000502	chp-1	protein_coding	I	5103581	5104911	551.271	0.0811865	0.151108	0.518411	0.739173	0.11668	0.180676
WBGene00000503	cht-1	protein_coding	X	3397613	3400017	426.572	-0.45607	0.289224	0.0116467	0.0622724	-0.741675	0.294004
WBGene00000506	cic-1	protein_coding	III	2394325	2401221	214.121	-0.144465	0.190813	0.306308	0.555745	-0.253849	0.248142
WBGene00000507	cit-1.1	protein_coding	III	8005933	8009821	442.995	0.138098	0.164732	0.295647	0.544512	0.210432	0.201213
WBGene00000508	cit-1.2	protein_coding	III	8010772	8013769	668.305	0.0240187	0.142476	0.842899	0.931543	0.0331832	0.167435
WBGene00000509	cka-1	protein_coding	IV	9731737	9737621	539.734	-0.0428204	0.145647	0.727532	0.87161	-0.0600599	0.172383
WBGene00000510	cka-2	protein_coding	X	4286124	4291496	96.0823	-0.131601	0.224008	0.37356	0.617503	-0.285703	0.321078
WBGene00000511	ckb-1	protein_coding	III	4365274	4367469	49.5311	0.0861712	0.254365	0.562616	0.769007	0.242219	0.418369
WBGene00000512	ckb-2	protein_coding	III	4367949	4370160	98.0744	0.0193508	0.215024	0.893139	0.954978	0.0430668	0.320598
WBGene00000513	ckb-3	protein_coding	III	4370885	4372820	4.47617	-0.072158	0.457537	0.636299	NA	-0.616197	1.30307
WBGene00000514	ckb-4	protein_coding	V	2106398	2109434	108.887	1.22821	0.32685	6.42973e-06	0.000120559	1.37745	0.305303	Up
WBGene00000515	ckc-1	protein_coding	X	3576606	3578830	150.911	0.0451993	0.204712	0.751751	0.885595	0.0923067	0.291803
WBGene00000516	cki-1	protein_coding	II	7811240	7812105	140.524	-0.64993	0.333422	0.00196256	0.0159784	-0.918706	0.296755
WBGene00000517	cki-2	protein_coding	II	7816499	7820281	477.622	0.00318365	0.154784	0.980071	0.991556	0.00469565	0.187979
WBGene00000518	ckk-1	protein_coding	III	5635479	5654564	149.553	-0.41893	0.278142	0.0168383	0.0816072	-0.700714	0.293159
WBGene00000519	cku-70	protein_coding	III	11154827	11168817	610.913	0.100301	0.147459	0.41809	0.65726	0.141083	0.174233
WBGene00000520	cku-80	protein_coding	III	4419848	4423375	695.34	-0.0363534	0.162891	0.781465	0.9017	-0.0560931	0.202202
WBGene00000521	cky-1	protein_coding	V	12736703	12741205	31.9998	0.058356	0.449104	0.699888	0.855205	0.496227	1.28732
WBGene00000522	clc-1	protein_coding	X	11047446	11049275	124.775	-0.0293033	0.223452	0.839792	0.930081	-0.0694248	0.343415
WBGene00000523	clc-2	protein_coding	X	7431465	7433535	38.5275	-0.06635	0.267954	0.655083	0.828374	-0.210129	0.470389
WBGene00000524	clc-3	protein_coding	X	3373236	3374742	37.3652	-0.0497701	0.266431	0.736119	0.877853	-0.159473	0.473217
WBGene00000525	clc-4	protein_coding	X	10782927	10783922	4.35	0.238634	0.69517	0.171873	NA	2.59563	1.89988
WBGene00000526	clc-5	protein_coding	X	7433569	7435736	60.3632	-0.329362	0.318101	0.0646633	0.21014	-0.714154	0.386535
WBGene00000527	cle-1	protein_coding	I	8705668	8724279	525.982	-0.198975	0.161095	0.127586	0.327572	-0.290293	0.190519
WBGene00000528	clh-1	protein_coding	II	11846507	11856461	600.647	-0.144613	0.146737	0.241587	0.484271	-0.200954	0.171605
WBGene00000529	clh-2	protein_coding	II	11351899	11370316	112.779	-0.253992	0.255697	0.112265	0.302468	-0.524435	0.330229
WBGene00000530	clh-3	protein_coding	II	7217943	7225914	332.521	0.147222	0.16583	0.266659	0.512158	0.224859	0.202432
WBGene00000531	clh-4	protein_coding	X	4094867	4100573	40.8674	0.0396345	0.261999	0.787657	0.904198	0.124456	0.462055
WBGene00000532	clh-5	protein_coding	II	9094710	9098605	988.393	0.163083	0.13606	0.165066	0.384955	0.215217	0.155029
WBGene00000533	clh-6	protein_coding	V	12060234	12063368	635.085	0.0384508	0.141555	0.750028	0.88465	0.0528495	0.165879
WBGene00000534	cpi-2	protein_coding	V	6044062	6045664	882.407	-0.2233	0.140244	0.0622787	0.205326	-0.295291	0.158392
WBGene00000535	cpi-1	protein_coding	IV	6092603	6093680	411.828	-0.502535	0.285359	0.00587756	0.0371253	-0.764181	0.277427		Down
WBGene00000536	clk-1	protein_coding	III	5277894	5279344	171.911	-0.0895239	0.190712	0.523957	0.742836	-0.162544	0.255068
WBGene00000537	clk-2	protein_coding	III	7515222	7518524	641.717	0.0796449	0.148573	0.522142	0.74151	0.112998	0.176546
WBGene00000539	cln-3.1	protein_coding	V	11263330	11265652	87.8706	0.0101621	0.228709	0.944193	0.976436	0.0252121	0.360169
WBGene00000540	cln-3.2	protein_coding	I	5274693	5278708	148.029	-0.0839511	0.19305	0.551568	0.760853	-0.155229	0.260709
WBGene00000541	cln-3.3	protein_coding	V	8683052	8686160	94.5863	-0.035493	0.215521	0.805646	0.913541	-0.0789208	0.320755
WBGene00000542	clp-1	protein_coding	III	7979959	7986380	2251.65	-0.0559695	0.134589	0.631431	0.814191	-0.0743536	0.154996
WBGene00000543	clp-2	protein_coding	III	4700325	4704025	470.425	0.0244867	0.150608	0.845231	0.932377	0.035282	0.180742
WBGene00000544	clp-3	protein_coding	I	12073072	12084225	12.6944	0.210785	0.460803	0.234867	0.477042	1.05147	0.885143
WBGene00000545	clp-4	protein_coding	III	1807740	1818323	450.788	-0.157194	0.152837	0.214436	0.451337	-0.22412	0.18053
WBGene00000546	clp-6	protein_coding	IV	1431190	1435039	18.1956	0.0900736	0.361053	0.561147	0.76838	0.454311	0.78176
WBGene00000547	clp-7	protein_coding	IV	1435465	1445966	982.677	0.368963	0.149615	0.00296306	0.0220778	0.471546	0.158687
WBGene00000548	clr-1	protein_coding	II	5466358	5473816	2299.19	0.00788563	0.138906	0.947253	0.977704	0.0107089	0.161871
WBGene00000549	cls-2	protein_coding	III	9055048	9058895	1423.03	0.431782	0.165684	0.00110159	0.00994776	0.551836	0.169109
WBGene00000550	clu-1	protein_coding	III	9516631	9521460	5206.99	0.416291	0.152874	0.000918509	0.00853871	0.521867	0.157456
WBGene00000551	clx-1	protein_coding	IV	7734648	7736324	7.79297	0.154501	0.789322	0.144612	0.354179	6.98553	4.78844
WBGene00000552	cmd-1	protein_coding	V	1156271	1158189	4199.71	0.000909049	0.139719	0.993938	0.997661	0.00123943	0.163145
WBGene00000553	cmk-1	protein_coding	IV	1824481	1834247	205.347	-0.420383	0.270441	0.0151417	0.0753871	-0.689468	0.283852
WBGene00000554	cnb-1	protein_coding	V	11375742	11378006	378.484	-0.450722	0.197789	0.00225857	0.0178527	-0.608554	0.199269		Down
WBGene00000556	cnc-2	protein_coding	V	1449665	1450183	15.0122	0.256845	0.446213	0.165819	0.386051	1.01833	0.734849
WBGene00000557	cnc-3	protein_coding	V	1448004	1448792	46.067	1.33455	0.498978	0.000153303	0.00190325	1.66791	0.440588	Up
WBGene00000558	cnc-4	protein_coding	V	1447195	1447707	32.8203	0.348139	0.425617	0.0791269	0.241375	0.974407	0.554973
WBGene00000560	cnc-6	protein_coding	III	1763522	1764902	2.66651	-0.0775257	0.509302	0.603697	NA	-0.849354	1.63623
WBGene00000561	cnd-1	protein_coding	III	5240591	5244639	14.3895	-0.223727	0.452142	0.212838	0.449288	-1.02571	0.823332
WBGene00000562	cng-1	protein_coding	V	15025731	15031473	21.9212	-0.0539488	0.304484	0.718252	0.865776	-0.218403	0.605335
WBGene00000563	cng-3	protein_coding	IV	9477522	9481037	10.7274	-0.00768047	0.360226	0.959119	0.9836	-0.0443648	0.865509
WBGene00000564	cnk-1	protein_coding	III	10271257	10278579	774.852	0.0650554	0.147292	0.599155	0.79427	0.09185	0.174748
WBGene00000565	cnt-1	protein_coding	II	12072170	12088868	676.638	0.244372	0.152475	0.0531264	0.184074	0.336484	0.173993
WBGene00000566	cnt-2	protein_coding	III	10655018	10677523	1259.3	0.0355875	0.134724	0.760516	0.890091	0.0473521	0.155353
WBGene00000567	cnx-1	protein_coding	III	9814364	9817137	2142.35	0.00487876	0.1222	0.964245	0.985198	0.00615065	0.137207
WBGene00000583	cof-2	protein_coding	I	6250475	6252876	26.337	0.0450083	0.289579	0.761704	0.890679	0.168685	0.556268
WBGene00000584	cog-1	protein_coding	II	14902493	14907533	46.3214	-0.0547284	0.269283	0.711579	0.862312	-0.177683	0.480567
WBGene00000585	cogc-2	protein_coding	IV	7036957	7039580	824.459	0.0729696	0.141358	0.545069	0.756203	0.0999491	0.16516
WBGene00000591	coh-1	protein_coding	X	7465193	7475018	437.81	-0.0131416	0.172006	0.922178	0.966004	-0.0214807	0.219886
WBGene00000592	coh-3	protein_coding	V	14457422	14460141	458.129	0.136039	0.156934	0.290034	0.539305	0.19917	0.188244
WBGene00000593	col-2	protein_coding	IV	10084439	10085451	37.5847	0.396305	0.913636	0.0591891	0.197838	3.89731	2.06558
WBGene00000594	col-3	protein_coding	IV	8824783	8826013	192.321	0.958387	0.271284	8.67171e-06	0.000157629	1.07725	0.242194	Up
WBGene00000596	col-7	protein_coding	I	7401132	7402761	23.1072	0.00184277	0.453986	0.990051	0.995651	0.0173886	1.39454
WBGene00000597	col-8	protein_coding	III	7019583	7020600	2522.69	-2.42973	0.153152	1.41694e-58	9.96301e-56	-2.45663	0.152242		Down
WBGene00000599	col-10	protein_coding	V	9164292	9165307	817.012	0.561132	0.223571	0.000512247	0.00526508	0.723174	0.208152	Up
WBGene00000601	col-12	protein_coding	V	10423898	10425198	199.96	1.80965	0.265559	5.31986e-13	2.98163e-11	1.90597	0.264099	Up
WBGene00000602	col-13	protein_coding	V	10420788	10421902	78.2107	3.94119	0.485553	1.64922e-17	1.46619e-15	4.12773	0.484694	Up
WBGene00000603	col-14	protein_coding	IV	7753408	7754656	537.434	1.34683	0.289259	2.37023e-07	6.06034e-06	1.46261	0.28303	Up
WBGene00000606	col-17	protein_coding	II	4866436	4867576	2150.98	5.32216	0.728878	5.19662e-15	3.77402e-13	5.79854	0.741306
WBGene00000608	col-19	protein_coding	X	421707	422691	3336.62	-1.7413	0.148746	8.25459e-33	2.09328e-30	-1.77249	0.148574		Down
WBGene00000609	col-20	protein_coding	II	4869670	4870791	5581.47	-3.10776	0.173569	1.69126e-73	1.86872e-70	-3.13357	0.172793
WBGene00000610	col-33	protein_coding	IV	4263293	4265223	20.7173	2.32546	0.777106	2.43989e-05	0.000388698	2.9054	0.688436	Up
WBGene00000611	col-34	protein_coding	IV	4243545	4244610	189.668	1.30656	0.291786	4.85392e-07	1.16114e-05	1.42441	0.283069	Up
WBGene00000612	col-35	protein_coding	I	7385907	7386935	6.01739	0.147847	0.476327	0.369978	0.614736	1.02888	1.14765
WBGene00000613	col-36	protein_coding	II	7167511	7168812	29.5442	0.159049	0.566836	0.327439	0.575533	1.57367	1.60695
WBGene00000614	col-37	protein_coding	V	12166706	12167753	26.0976	0.718651	1.14788	0.0179971	0.0856871	3.893	1.64562
WBGene00000615	col-38	protein_coding	II	8568035	8569088	95.3462	0.863926	0.450955	0.00151026	0.0128575	1.2216	0.385033
WBGene00000616	col-39	protein_coding	II	10704916	10706019	1471.47	0.139368	0.141861	0.248782	0.492439	0.189547	0.16435
WBGene00000617	col-40	protein_coding	II	1104942	1106964	50.619	0.79543	1.17069	0.0146599	0.0737236	3.74269	1.53347
WBGene00000618	col-41	protein_coding	X	15175032	15176481	1321.49	4.97659	0.725878	1.66064e-13	1.00739e-11	5.43628	0.737261	Up
WBGene00000620	col-43	protein_coding	V	8049703	8050911	45.7863	0.137392	0.50613	0.395061	0.636052	1.14646	1.34803
WBGene00000621	col-44	protein_coding	X	13591475	13592543	4.70537	0.466595	0.830487	0.0527048	NA	2.68681	1.38686
WBGene00000622	col-45	protein_coding	I	115687	117498	6.43836	0.042754	0.41527	0.77741	0.900265	0.31639	1.11919
WBGene00000623	col-46	protein_coding	I	741878	747213	36.8725	2.87073	0.606682	2.46827e-08	7.82412e-07	3.19869	0.573705	Up
WBGene00000624	col-47	protein_coding	I	745888	748288	1.80668	0.203574	0.717724	0.195545	NA	3.11584	2.40727
WBGene00000625	col-48	protein_coding	I	3010684	3011665	318.077	1.08033	0.314075	1.53439e-05	0.000259121	1.22574	0.283495	Up
WBGene00000626	col-49	protein_coding	I	3137185	3138447	28.7309	0.104394	0.326165	0.49979	0.724171	0.425424	0.630425
WBGene00000627	col-50	protein_coding	I	3651236	3652702	19.7714	3.87968	1.02511	1.18872e-06	2.67271e-05	4.70701	0.969016	Up
WBGene00000628	col-51	protein_coding	I	3653997	3655265	18.5108	3.18638	0.883123	2.40229e-06	4.9747e-05	3.81339	0.808564	Up
WBGene00000629	col-52	protein_coding	I	4571192	4575038	3.4164	0.143191	0.535255	0.37365	NA	1.32952	1.49442
WBGene00000630	col-53	protein_coding	I	5644729	5646370	24.0807	-0.0551873	0.295637	0.711455	0.86223	-0.211589	0.572013
WBGene00000631	col-54	protein_coding	I	5842709	5844050	116.044	3.51069	0.351687	4.71101e-25	7.21531e-23	3.60862	0.349041	Up
WBGene00000633	col-56	protein_coding	I	6232777	6234280	6.44922	-0.0429666	0.406912	0.776567	0.90006	-0.304599	1.0733
WBGene00000634	col-58	protein_coding	I	6311229	6312416	52.4113	0.406983	0.420734	0.048155	0.17148	0.974149	0.492991
WBGene00000636	col-60	protein_coding	I	7105302	7106926	38.3026	0.0669545	0.362652	0.661345	0.832344	0.361227	0.824612
WBGene00000637	col-61	protein_coding	I	7202205	7203533	11.7851	1.73224	1.19189	0.00116697	0.0104588	3.18055	0.979586	Up
WBGene00000638	col-62	protein_coding	I	7403291	7404374	20.6726	0.0428829	0.417562	0.776695	0.90006	0.321001	1.13176
WBGene00000639	col-63	protein_coding	I	8243694	8244963	39.6246	0.47312	0.466734	0.0338726	0.134456	1.09754	0.517322
WBGene00000640	col-64	protein_coding	I	9893621	9895766	3.73296	0.0439373	0.459447	0.768635	NA	0.407541	1.38544
WBGene00000641	col-65	protein_coding	I	11489158	11490578	510.501	0.224978	0.231021	0.142005	0.350124	0.442042	0.301044
WBGene00000644	col-68	protein_coding	II	104534	105829	22.1366	0.216136	0.380354	0.212287	0.448528	0.77969	0.625101
WBGene00000645	col-69	protein_coding	II	303881	305745	20.2598	0.0569351	0.309576	0.704146	0.856978	0.236204	0.622033
WBGene00000647	col-71	protein_coding	II	3500077	3502570	125.677	1.16295	0.387989	6.62124e-05	0.000919426	1.3775	0.345281	Up
WBGene00000648	col-72	protein_coding	II	3520703	3524197	4.08146	0.107495	0.495147	0.490882	NA	0.972512	1.41167
WBGene00000649	col-73	protein_coding	II	4872098	4873129	1188.73	5.607	0.223967	4.41275e-140	2.27536e-136	5.6517	0.224308
WBGene00000650	col-74	protein_coding	II	5830374	5832022	1130.49	-2.71439	0.716195	1.48298e-06	3.24932e-05	-3.17689	0.659993
WBGene00000651	col-75	protein_coding	II	6426293	6427513	6.32553	0.122593	0.456672	0.445132	0.680544	0.868342	1.13724
WBGene00000652	col-76	protein_coding	II	8204339	8207495	271.964	-0.231092	0.26013	0.146862	0.357034	-0.507132	0.349576
WBGene00000653	col-77	protein_coding	II	8358228	8359381	518.073	0.984577	0.295519	1.88189e-05	0.000309034	1.12243	0.262343
WBGene00000655	col-79	protein_coding	II	10703613	10704572	7.9631	0.508486	0.745641	0.0446713	0.163054	2.09167	1.0418
WBGene00000656	col-80	protein_coding	II	10707201	10708287	3752.81	-0.898655	0.245142	4.49727e-06	8.75073e-05	-1.00291	0.218644
WBGene00000657	col-81	protein_coding	II	11012397	11013767	1042.93	-1.27801	0.237513	7.69287e-09	2.6802e-07	-1.35579	0.234766
WBGene00000658	col-83	protein_coding	II	11044074	11045972	3.77589	0.19671	0.6265	0.24123	NA	2.0553	1.75379
WBGene00000659	col-84	protein_coding	II	11868534	11869682	28.79	0.794283	0.646447	0.00888058	0.0507851	1.58466	0.605613
WBGene00000660	col-85	protein_coding	II	12493703	12495095	29.6982	4.92565	0.949384	3.02276e-09	1.10541e-07	5.71767	0.964135
WBGene00000661	col-86	protein_coding	II	13096009	13098275	2.92559	0.0169403	0.500542	0.906131	NA	0.205027	1.73869
WBGene00000662	col-87	protein_coding	II	14089851	14094690	5.34711	0.0706886	0.444261	0.644124	0.821592	0.567102	1.22765
WBGene00000663	col-88	protein_coding	III	41063	41971	74.26	-0.122928	0.341916	0.435628	0.672126	-0.512935	0.657949
WBGene00000664	col-89	protein_coding	III	4748127	4749164	47.8975	0.248784	0.320493	0.144515	0.35409	0.656476	0.449893
WBGene00000665	col-90	protein_coding	III	7948838	7950068	841.513	4.87922	0.774916	6.73671e-12	3.45067e-10	5.4004	0.786872	Up
WBGene00000666	col-91	protein_coding	III	8262355	8263664	147.328	1.7759	0.296834	1.30763e-10	5.79592e-09	1.89594	0.295029	Up
WBGene00000667	col-92	protein_coding	III	10982139	10983253	204.115	2.46128	0.275506	5.30128e-21	6.11982e-19	2.54506	0.270664	Up
WBGene00000668	col-93	protein_coding	III	10984552	10985609	1568.22	0.240327	0.17882	0.0820626	0.247403	0.369852	0.2127
WBGene00000669	col-94	protein_coding	III	10986808	10987873	24.9649	-3.29842	0.783182	2.59163e-07	6.60461e-06	-3.79492	0.736741		Down
WBGene00000670	col-95	protein_coding	III	11703994	11705091	2336.78	0.117307	0.181523	0.395747	0.636826	0.198319	0.233525
WBGene00000671	col-96	protein_coding	III	11705652	11706765	96.2812	-0.274196	0.295679	0.104766	0.289709	-0.625452	0.385564
WBGene00000672	col-97	protein_coding	III	12992405	12993707	544.422	1.41264	0.299823	1.87224e-07	4.93384e-06	1.53705	0.294929	Up
WBGene00000673	col-98	protein_coding	III	13019008	13020226	1749.61	-0.155279	0.169305	0.246507	0.490194	-0.240707	0.207707
WBGene00000674	col-99	protein_coding	IV	137974	147919	230.763	0.146548	0.218488	0.32057	0.569464	0.302156	0.304198
WBGene00000675	col-101	protein_coding	IV	325435	327020	3365.9	0.0814074	0.156603	0.525899	0.744361	0.120476	0.189941
WBGene00000676	col-102	protein_coding	IV	604444	605931	18.9239	0.151047	0.728465	0.241502	0.484225	3.95082	3.37319
WBGene00000677	col-103	protein_coding	IV	762413	763678	2053.46	-0.171919	0.175601	0.207913	0.443575	-0.273037	0.216813
WBGene00000678	col-104	protein_coding	IV	1353636	1355305	389.986	1.5606	0.277349	1.71754e-09	6.496e-08	1.66778	0.276925	Up
WBGene00000679	col-105	protein_coding	IV	1357736	1359225	12.0224	0.0191999	0.361388	0.898202	0.957015	0.110918	0.867002
WBGene00000680	col-106	protein_coding	IV	1459896	1460786	3390.08	-0.716973	0.17199	3.73716e-07	9.22013e-06	-0.792606	0.155967		Down
WBGene00000681	col-107	protein_coding	IV	1548721	1549714	2899.38	0.19542	0.149326	0.11744	0.311234	0.270816	0.172978
WBGene00000682	col-108	protein_coding	IV	1768588	1769702	3.68166	0.459773	0.971118	0.0442408	NA	3.96536	1.97105
WBGene00000683	col-109	protein_coding	IV	1817392	1820253	367.183	0.538741	0.568271	0.0300126	0.123771	1.37373	0.633077
WBGene00000684	col-110	protein_coding	IV	4608201	4609668	11.026	1.64486	1.33613	0.00179874	0.0148557	3.53788	1.13336	Up
WBGene00000685	col-111	protein_coding	IV	4655791	4657974	136.789	3.32342	0.353555	1.04001e-22	1.29742e-20	3.42513	0.349218	Up
WBGene00000687	col-113	protein_coding	IV	7150663	7152509	100.733	0.821504	0.421703	0.00144925	0.0124271	1.14989	0.361072	Up
WBGene00000688	col-114	protein_coding	IV	7245460	7246653	1.89774	0.07315	0.543151	0.612388	NA	0.98075	1.93569
WBGene00000689	col-115	protein_coding	IV	7988685	7991428	102.017	0.329224	0.285319	0.0546896	0.187499	0.650307	0.338467
WBGene00000690	col-116	protein_coding	IV	8355906	8357919	8.52124	-0.243576	0.515648	0.189235	0.418601	-1.3025	0.992123
WBGene00000691	col-117	protein_coding	IV	8822962	8824195	136.715	0.737429	0.346182	0.000947673	0.00877292	0.989964	0.299479	Up
WBGene00000692	col-118	protein_coding	IV	8848218	8849673	271.41	0.0590835	0.170045	0.659023	0.830808	0.0948932	0.215049
WBGene00000693	col-119	protein_coding	IV	8978926	8979795	10347.2	-1.32084	0.193711	1.51034e-12	8.11229e-11	-1.37246	0.194027		Down
WBGene00000694	col-120	protein_coding	IV	9260610	9261787	45.5671	0.0134996	0.316783	0.927578	0.968787	0.0613099	0.674536
WBGene00000695	col-121	protein_coding	IV	9394873	9396218	111.34	-2.38756	1.25329	0.000257174	0.0029934	-3.67951	1.0067		Down
WBGene00000696	col-122	protein_coding	IV	9563379	9564441	6907.21	-0.447901	0.165791	0.000713143	0.0069294	-0.566319	0.167329
WBGene00000697	col-123	protein_coding	IV	9821921	9823156	10.8214	0.316669	0.53273	0.117179	0.310756	1.34748	0.860061
WBGene00000698	col-124	protein_coding	IV	10216451	10217617	4091.89	-3.25736	0.154328	1.43382e-100	4.43594e-97	-3.27688	0.153923		Down
WBGene00000699	col-125	protein_coding	IV	11225506	11226516	3164.82	2.61032	0.223418	1.71248e-33	4.99818e-31	2.66252	0.220768	Up
WBGene00000701	col-127	protein_coding	IV	11264908	11266190	0.639435	0.0896315	0.671784	0.449612	NA	2.65397	3.51026
WBGene00000702	col-128	protein_coding	IV	11550002	11551960	38.989	2.85089	0.540632	1.51745e-09	5.78162e-08	3.11555	0.515606	Up
WBGene00000703	col-129	protein_coding	IV	12108734	12110439	1092.71	-1.59862	0.210463	3.16644e-15	2.36626e-13	-1.66098	0.210673		Down
WBGene00000704	col-130	protein_coding	IV	12427505	12428516	381.624	1.9041	0.226253	1.68699e-18	1.67282e-16	1.97339	0.22485	Up
WBGene00000705	col-131	protein_coding	IV	13065729	13067300	43.9124	1.09177	0.560143	0.00109413	0.00989767	1.55409	0.475964	Up
WBGene00000706	col-132	protein_coding	IV	13089643	13091067	1.46383	0.205377	0.738346	0.182219	NA	3.45535	2.59031
WBGene00000707	col-133	protein_coding	IV	14098325	14099356	241.242	3.22611	0.396755	6.66e-18	6.24385e-16	3.35685	0.389398	Up
WBGene00000708	col-135	protein_coding	IV	15129655	15131797	101.385	-2.43739	0.378742	1.72687e-12	9.21139e-11	-2.593	0.367544		Down
WBGene00000710	col-137	protein_coding	IV	16601480	16602776	14.1602	-0.0010316	0.443909	0.994455	0.997757	-0.00922631	1.32754
WBGene00000711	col-138	protein_coding	IV	17182884	17183729	104.338	1.07376	0.436962	0.000301085	0.00339962	1.35807	0.375743	Up
WBGene00000712	col-139	protein_coding	V	4652863	4653971	1200.57	-1.67994	0.197049	1.26872e-18	1.27441e-16	-1.73455	0.196919		Down
WBGene00000713	col-140	protein_coding	V	5835855	5836834	7169.76	-1.30766	0.158701	3.41008e-17	2.93059e-15	-1.34211	0.159176		Down
WBGene00000714	col-141	protein_coding	V	6829704	6830739	14.5592	0.928427	0.865899	0.00841908	0.0488319	2.2049	0.836844	Up
WBGene00000715	col-142	protein_coding	V	6831177	6832256	537.236	0.171297	0.172459	0.205549	0.440211	0.267778	0.211532
WBGene00000716	col-143	protein_coding	V	6835635	6836704	3366.88	0.0944581	0.174399	0.486062	0.712876	0.154396	0.221647
WBGene00000717	col-144	protein_coding	V	9159586	9160642	1420.66	1.08201	0.177865	9.68537e-11	4.36802e-09	1.12584	0.173961	Up
WBGene00000718	col-145	protein_coding	V	9161992	9163005	137.799	3.39323	0.335127	9.35551e-26	1.5075e-23	3.48345	0.331995	Up
WBGene00000719	col-146	protein_coding	V	9629943	9631012	112.231	3.14966	0.356506	1.47599e-20	1.69127e-18	3.25717	0.350433	Up
WBGene00000720	col-147	protein_coding	V	9632029	9633338	1068.37	0.0988152	0.132116	0.390858	0.63238	0.12939	0.150794
WBGene00000722	col-149	protein_coding	V	10291701	10292869	441.378	2.99309	0.285322	1.2182e-27	2.32645e-25	3.06545	0.281364	Up
WBGene00000723	col-150	protein_coding	V	10293563	10294649	41.3696	0.893448	0.61298	0.00450961	0.0303697	1.53653	0.54101	Up
WBGene00000724	col-151	protein_coding	V	10393531	10395223	2.25352	0.13645	0.601593	0.368504	NA	1.81847	2.02214
WBGene00000725	col-152	protein_coding	V	10560921	10562252	1.59215	-0.00023544	0.546047	0.998622	NA	-0.00377588	2.18675
WBGene00000726	col-153	protein_coding	V	10949811	10951821	51.4604	0.444333	0.37764	0.0280951	0.118066	0.89125	0.40586
WBGene00000727	col-154	protein_coding	V	11385360	11386529	218.121	2.95529	0.263493	4.19933e-31	9.41441e-29	3.01791	0.260201	Up
WBGene00000728	col-155	protein_coding	V	11388852	11389876	232.777	1.17133	0.265529	5.2133e-07	1.2426e-05	1.27028	0.25313	Up
WBGene00000729	col-156	protein_coding	V	11449219	11450357	93.6705	5.58641	0.668249	9.45481e-19	9.62213e-17	5.99235	0.677762	Up
WBGene00000730	col-157	protein_coding	V	11484042	11485039	155.281	5.34218	0.421488	1.87144e-38	7.23732e-36	5.49861	0.424031	Up
WBGene00000731	col-158	protein_coding	V	11829582	11831219	38.2407	0.320618	0.424708	0.0983451	0.277812	0.965968	0.584397
WBGene00000732	col-159	protein_coding	V	13198231	13202177	982.943	2.48571	0.206193	2.20923e-35	7.42927e-33	2.53284	0.20404	Up
WBGene00000733	col-160	protein_coding	V	13200982	13202189	4216.98	-0.266738	0.160818	0.0408876	0.15328	-0.375016	0.183412
WBGene00000734	col-161	protein_coding	V	13317029	13318011	255.805	5.03305	0.43015	4.05742e-33	1.10113e-30	5.19214	0.433075	Up
WBGene00000735	col-162	protein_coding	V	13441961	13443419	139.407	5.41282	0.55798	5.87502e-24	8.33768e-22	5.69041	0.563744	Up
WBGene00000736	col-163	protein_coding	V	20600095	20602540	3.13532	-0.015594	0.48206	0.914743	NA	-0.170358	1.59127
WBGene00000737	col-164	protein_coding	X	2093469	2094846	1.13462	0.0977579	0.630803	0.46469	NA	1.98019	2.70834
WBGene00000738	col-165	protein_coding	X	4353618	4354852	1217.99	-2.36389	0.785568	2.25353e-05	0.000361992	-2.94926	0.695882		Down
WBGene00000739	col-166	protein_coding	X	6280016	6280921	4024.7	1.26187	0.153323	3.81215e-17	3.25802e-15	1.29371	0.153674	Up
WBGene00000740	col-167	protein_coding	X	6323488	6324393	829.394	1.26827	0.185534	1.35292e-12	7.34327e-11	1.31523	0.185537	Up
WBGene00000741	col-168	protein_coding	X	6326388	6327293	142.534	1.30053	0.282325	2.84502e-07	7.19111e-06	1.41087	0.274839	Up
WBGene00000742	col-169	protein_coding	X	6329160	6330062	237.995	2.72119	0.273724	3.00337e-25	4.69284e-23	2.79528	0.26925	Up
WBGene00000743	col-170	protein_coding	X	6331709	6332611	116.646	2.7202	0.33579	6.04575e-18	5.70254e-16	2.83064	0.327936	Up
WBGene00000745	col-172	protein_coding	X	6672819	6674423	53.6625	0.693241	0.478163	0.00679953	0.0416562	1.17824	0.435338	Up
WBGene00000746	col-173	protein_coding	X	6875169	6877536	69.0302	4.3332	0.499317	1.67952e-19	1.81681e-17	4.53565	0.502154	Up
WBGene00000747	col-174	protein_coding	X	7546809	7548365	32.5021	0.977631	0.623863	0.00307223	0.0226738	1.599	0.540127	Up
WBGene00000748	col-175	protein_coding	X	9233638	9234618	38.189	0.274741	0.420528	0.140138	0.347347	0.939876	0.637084
WBGene00000749	col-176	protein_coding	X	10077597	10078728	47.6119	2.45101	0.515337	2.81406e-08	8.79408e-07	2.72624	0.490983	Up
WBGene00000750	col-177	protein_coding	X	10999663	11001850	27.8718	-0.240533	0.358156	0.167843	0.388618	-0.741175	0.537407
WBGene00000751	col-178	protein_coding	X	11199455	11200467	3437.14	-1.43686	0.175777	4.70694e-17	3.97878e-15	-1.48007	0.176329		Down
WBGene00000752	col-179	protein_coding	X	11201465	11202485	577.932	-0.657481	0.275897	0.000505879	0.00521348	-0.850084	0.244444		Down
WBGene00000753	col-180	protein_coding	X	11711378	11712280	417.821	4.05196	0.264604	3.51367e-54	2.0905e-51	4.10668	0.264961	Up
WBGene00000754	col-181	protein_coding	X	12104930	12106102	5809.39	-0.784065	0.21638	4.25065e-06	8.33376e-05	-0.883431	0.192103		Down
WBGene00000755	col-182	pseudogene	X	12636153	12637056	32.5195	0.631773	0.516474	0.0133668	0.0685993	1.23965	0.501104
WBGene00000756	col-183	protein_coding	X	13466643	13467764	9.26551	2.00157	1.49836	0.000953496	0.00882154	4.0523	1.22652	Up
WBGene00000757	col-184	protein_coding	X	13469455	13470409	2918.96	-0.704272	0.152551	4.24411e-08	1.27878e-06	-0.767262	0.140002		Down
WBGene00000758	col-185	protein_coding	X	13510035	13511097	7.24341	1.51258	1.73041	0.00239529	0.0187419	5.30544	1.74736	Up
WBGene00000759	col-186	protein_coding	X	15951494	15954789	29.5128	0.322847	0.392828	0.0894668	0.260997	0.880278	0.518355
WBGene00000760	col-187	protein_coding	X	16072895	16074923	5.59667	0.215053	0.55274	0.227595	0.46749	1.50547	1.24772
WBGene00000761	coq-1	protein_coding	I	5412841	5415629	520.675	0.142078	0.161008	0.276073	0.523035	0.212011	0.194652
WBGene00000762	coq-2	protein_coding	III	6935967	6939457	239.593	-0.195984	0.189292	0.166006	0.386355	-0.328017	0.23681
WBGene00000763	coq-3	protein_coding	IV	14793104	14796324	250.173	0.0231979	0.170975	0.862726	0.940682	0.0376487	0.217741
WBGene00000764	coq-4	protein_coding	I	3869214	3870114	118.339	-0.101144	0.21245	0.485837	0.712876	-0.210706	0.302327
WBGene00000765	coq-5	protein_coding	III	7857315	7858457	430.11	0.166216	0.161943	0.204209	0.439161	0.246986	0.19453
WBGene00000766	coq-6	protein_coding	V	9336762	9338858	380.281	0.0233795	0.155232	0.854692	0.936793	0.0345512	0.188666
WBGene00000767	coq-8	protein_coding	III	4863427	4866948	922.236	0.514218	0.18819	0.000353314	0.00386795	0.647609	0.181266	Up
WBGene00000768	cor-1	protein_coding	III	10249111	10254709	271.101	0.0132034	0.187513	0.924433	0.966939	0.0239514	0.252516
WBGene00000770	cpb-1	protein_coding	III	9322310	9324913	634.792	0.279916	0.173932	0.0401438	0.151351	0.409879	0.19972
WBGene00000771	cpb-2	protein_coding	II	6192784	6195170	11.3855	0.353422	0.65493	0.0967328	0.274763	1.91174	1.15102
WBGene00000772	cpb-3	protein_coding	I	5788634	5791752	1786.14	0.0734291	0.135729	0.53148	0.74829	0.097941	0.156518
WBGene00000773	cpf-1	protein_coding	II	8600449	8602440	637.054	0.0942409	0.161122	0.469829	0.701117	0.142624	0.197333
WBGene00000774	cpf-2	protein_coding	III	13266932	13268883	539.341	0.158097	0.153109	0.212303	0.448528	0.22564	0.180909
WBGene00000775	cpin-1	protein_coding	IV	9450675	9453409	61.4284	-0.15959	0.255415	0.298845	0.547536	-0.395238	0.380434
WBGene00000776	cpl-1	protein_coding	V	16592572	16595346	9348.4	-0.0260264	0.11814	0.806177	0.913876	-0.0322766	0.131547
WBGene00000777	cpn-1	protein_coding	I	8636123	8637943	1609.6	0.00145946	0.12989	0.989768	0.99556	0.00190112	0.148246
WBGene00000778	cpn-2	protein_coding	II	337782	339250	79.6787	-0.0596512	0.277239	0.688126	0.848515	-0.20263	0.504808
WBGene00000779	cpn-3	protein_coding	I	3987940	3988699	1921.65	-0.279789	0.146676	0.0230881	0.102806	-0.370937	0.163266
WBGene00000780	cpn-4	protein_coding	I	10924240	10925750	184.173	0.0836249	0.200444	0.557629	0.765737	0.162609	0.277316
WBGene00000781	cpr-1	protein_coding	V	11975551	11976756	7271.4	-1.74342	0.177094	5.01975e-24	7.18986e-22	-1.78744	0.17681		Down
WBGene00000782	cpr-2	protein_coding	V	16532936	16534100	34.3437	-0.541112	0.482103	0.0216408	0.0980268	-1.14348	0.4979
WBGene00000783	cpr-3	protein_coding	V	15296834	15298700	172.821	0.0259204	0.189757	0.85289	0.936034	0.0477077	0.257278
WBGene00000784	cpr-4	protein_coding	V	6614674	6615851	3941.84	-1.71699	0.179071	6.71978e-23	8.59076e-21	-1.7621	0.178857		Down
WBGene00000785	cpr-5	protein_coding	V	1132598	1134036	3224.19	0.26764	0.152491	0.0340859	0.134887	0.364484	0.172003
WBGene00000786	cpr-6	protein_coding	X	6607207	6609045	7332.27	0.2896	0.123799	0.00804158	0.0471015	0.354494	0.133755
WBGene00000787	cps-6	protein_coding	I	4446586	4448461	405.645	0.0896153	0.16003	0.490283	0.716369	0.134938	0.195603
WBGene00000788	cpz-1	protein_coding	I	2686640	2689429	3122.02	0.365925	0.154456	0.00390527	0.0274719	0.474737	0.164513
WBGene00000789	cpz-2	protein_coding	V	13381189	13383077	1274.75	-0.264069	0.153394	0.0372595	0.143446	-0.361478	0.173545
WBGene00000792	crb-1	protein_coding	X	17402532	17414014	263.396	0.0379365	0.219363	0.793175	0.907114	0.0867845	0.330998
WBGene00000793	crh-1	protein_coding	III	11657767	11693981	1052.39	-0.0837164	0.135713	0.475544	0.705562	-0.111555	0.156352
WBGene00000794	crn-1	protein_coding	I	3481997	3484500	904.887	0.112753	0.148137	0.364061	0.608696	0.158792	0.174948
WBGene00000795	crn-2	protein_coding	V	5594615	5595842	164.736	0.052397	0.193631	0.709838	0.861146	0.0985217	0.26479
WBGene00000796	crn-3	protein_coding	II	10588042	10592652	1259.74	0.118407	0.141586	0.326585	0.574933	0.161428	0.164552
WBGene00000797	crn-4	protein_coding	X	2255848	2258101	126.102	0.168621	0.228974	0.261797	0.506661	0.357713	0.318774
WBGene00000798	crn-5	protein_coding	II	10592752	10593591	210.719	-0.0230225	0.191659	0.869581	0.943856	-0.0429698	0.261706
WBGene00000799	crn-6	protein_coding	III	9367271	9370381	109.947	-0.0550884	0.214541	0.702874	0.856201	-0.120472	0.31583
WBGene00000800	cars-1	protein_coding	I	2623099	2628112	2145.19	0.31771	0.128697	0.00464312	0.0310257	0.391362	0.138251
WBGene00000801	cars-2	pseudogene	I	2629685	2632320	86.5658	0.172744	0.230109	0.251529	0.496098	0.366382	0.319525
WBGene00000802	crt-1	protein_coding	V	6098992	6100542	12446.9	0.511322	0.131534	5.28349e-06	0.000101402	0.585477	0.128586	Up
WBGene00000803	csb-1	protein_coding	X	15861294	15865918	270.429	0.318349	0.19021	0.0262319	0.112387	0.477313	0.214739
WBGene00000804	csc-1	protein_coding	II	13596955	13597947	649.213	0.265595	0.187221	0.0607031	0.2017	0.414096	0.220775
WBGene00000812	csk-1	protein_coding	I	71425	81156	937.024	-0.0287295	0.14449	0.814255	0.91903	-0.0400885	0.170633
WBGene00000813	csn-1	protein_coding	V	17861368	17870651	792.962	0.0508542	0.154984	0.690145	0.84965	0.0749008	0.187882
WBGene00000814	csn-2	protein_coding	I	6022660	6026877	890.93	-0.259648	0.170829	0.054461	0.186839	-0.381259	0.198247
WBGene00000815	csn-3	protein_coding	IV	194742	202586	718.508	-0.0364334	0.166333	0.783237	0.902576	-0.0573869	0.208602
WBGene00000816	csn-4	protein_coding	IV	1077463	1087013	694.816	0.12305	0.151742	0.328997	0.576645	0.176065	0.18037
WBGene00000817	csn-5	protein_coding	IV	5649533	5651079	629.482	-0.0676781	0.154877	0.59563	0.792381	-0.0994264	0.187351
WBGene00000818	csn-6	protein_coding	IV	13300824	13303711	703.818	0.0247061	0.141308	0.837613	0.928686	0.0339355	0.165581
WBGene00000819	csp-1	protein_coding	II	13601204	13605057	20.1288	-0.0143675	0.312032	0.922848	0.96613	-0.063443	0.655088
WBGene00000820	csp-2	protein_coding	IV	6307739	6315719	16.9058	-0.0211432	0.316466	0.886908	0.952154	-0.0954183	0.670933
WBGene00000821	csp-3	protein_coding	I	11888501	11890558	1.57946	-0.0677291	0.57629	0.622829	NA	-1.13132	2.30016
WBGene00000822	csq-1	protein_coding	X	14684877	14688322	1610.97	-0.231133	0.136027	0.0487445	0.172943	-0.300008	0.152225
WBGene00000829	ctb-1	protein_coding	MtDNA	4504	5621	14413.2	0.263688	0.143106	0.0296397	0.122724	0.347507	0.159783
WBGene00000830	ctl-1	protein_coding	II	14303568	14306260	52.6064	0.211947	0.287918	0.191184	0.421318	0.542535	0.415072
WBGene00000831	ctl-2	protein_coding	II	14299556	14302027	847.652	-0.260557	0.158508	0.0439696	0.161177	-0.364367	0.180883
WBGene00000832	ctn-1	protein_coding	I	2606741	2617360	562.455	-0.0525564	0.163248	0.688761	0.848824	-0.0811176	0.202522
WBGene00000833	cts-1	protein_coding	III	10214771	10216635	7690.44	0.154931	0.150991	0.217728	0.455755	0.219095	0.177751
WBGene00000834	cua-1	protein_coding	III	13439730	13455307	1488.07	0.282536	0.145503	0.0210739	0.0958519	0.372579	0.161523
WBGene00000835	cuc-1	protein_coding	III	7860466	7860985	289.842	0.270743	0.191044	0.0584066	0.196113	0.426368	0.225277
WBGene00000836	cul-1	protein_coding	III	10471237	10475129	1429.53	0.154124	0.14143	0.201214	0.435195	0.208583	0.163198
WBGene00000837	cul-2	protein_coding	III	13687269	13692683	2419.56	0.0558517	0.122273	0.607953	0.799085	0.0703568	0.137149
WBGene00000838	cul-3	protein_coding	V	177417	185172	2408.27	0.193142	0.122826	0.0765875	0.236332	0.240625	0.135882
WBGene00000839	cul-4	protein_coding	II	7302101	7305758	877.899	-0.0106944	0.138704	0.92844	0.969077	-0.0145086	0.161552
WBGene00000840	cul-5	protein_coding	V	10179535	10183154	860.324	0.0529986	0.137577	0.654508	0.827984	0.0714039	0.159559
WBGene00000841	cul-6	protein_coding	IV	12586485	12590451	37.2046	0.0844601	0.27822	0.573795	0.776609	0.276799	0.492112
WBGene00000843	cup-2	protein_coding	I	10398990	10400177	892.965	0.019664	0.139227	0.869164	0.943682	0.0267404	0.162338
WBGene00000845	cup-4	protein_coding	III	7866489	7868737	60.8947	-0.347687	0.337413	0.0585754	0.196557	-0.764926	0.40443
WBGene00000846	cup-5	protein_coding	III	7584181	7591581	771.931	0.018474	0.144547	0.879946	0.949092	0.0257946	0.170782
WBGene00000851	cut-1	protein_coding	II	11269122	11271660	12.5348	0.493679	0.741643	0.0478314	0.170603	2.09832	1.06037
WBGene00000853	cut-6	protein_coding	III	10911460	10916665	103.334	-0.456084	0.685519	0.056576	0.19213	-1.88675	0.989606
WBGene00000854	cux-7	protein_coding	III	7518628	7520845	514.792	0.0430186	0.149186	0.73018	0.873697	0.0614533	0.178185
WBGene00000857	cwn-1	protein_coding	II	130983	133598	144.237	-0.186019	0.239767	0.223979	0.462766	-0.405533	0.333494
WBGene00000858	cwn-2	protein_coding	IV	10067816	10070251	96.6457	-0.474375	0.352426	0.0174492	0.0839024	-0.856574	0.360344
WBGene00000859	cwp-1	protein_coding	V	4840617	4841279	1.04891	0.0327	0.604421	0.793516	NA	0.756554	2.89039
WBGene00000860	cwp-2	protein_coding	V	4841935	4842644	0.847921	0.0980585	0.679082	0.411831	NA	2.87921	3.50834
WBGene00000862	cwp-4	protein_coding	V	5053635	5056474	25.2452	-0.545804	0.518902	0.0244409	0.107013	-1.23494	0.548829
WBGene00000863	cya-1	protein_coding	III	9106699	9109272	814.22	0.0539674	0.145521	0.660416	0.831716	0.0755861	0.172045
WBGene00000864	cya-2	protein_coding	II	2022673	2023614	7.78765	-0.0718176	0.408442	0.640856	0.819266	-0.480712	1.03046
WBGene00000865	cyb-1	protein_coding	IV	10735216	10737177	2947.34	0.270421	0.130568	0.0174333	0.0838793	0.34024	0.143112
WBGene00000866	cyb-2.1	protein_coding	IV	10985985	10987426	945.478	-0.099699	0.150425	0.426535	0.66419	-0.142365	0.179044
WBGene00000867	cyb-2.2	protein_coding	I	4114861	4116370	1626.05	0.0820432	0.137162	0.487563	0.714382	0.110074	0.158565
WBGene00000868	cyb-3	protein_coding	V	15395696	15397353	5266.27	0.320986	0.129192	0.00433514	0.02951	0.395533	0.138653
WBGene00000869	cyc-1	protein_coding	I	8022674	8024422	3339.24	0.242781	0.123224	0.0261332	0.112087	0.300065	0.134908
WBGene00000870	cyd-1	protein_coding	II	12980591	12993117	198.314	0.176985	0.192679	0.213435	0.449935	0.306283	0.246173
WBGene00000871	cye-1	protein_coding	I	6780799	6784397	1384.84	0.0530637	0.141092	0.659486	0.831019	0.0727067	0.165009
WBGene00000872	cyk-1	protein_coding	III	7023642	7029205	1035.7	-0.146721	0.15199	0.24497	0.488016	-0.208959	0.179726
WBGene00000874	cyk-3	protein_coding	III	6020159	6024985	1152.35	0.114463	0.132301	0.320685	0.569604	0.149749	0.150797
WBGene00000875	cyk-4	protein_coding	III	13768648	13771224	2125.16	0.315434	0.136107	0.00693809	0.0422874	0.397743	0.147323
WBGene00000876	cyl-1	protein_coding	V	11991011	11993723	815.686	-0.0840818	0.140201	0.483239	0.711249	-0.114405	0.163178
WBGene00000877	cyn-1	protein_coding	V	14356076	14356822	904.71	0.19598	0.160903	0.133145	0.336156	0.286067	0.190481
WBGene00000878	cyn-2	protein_coding	III	13692668	13693811	40.2526	-0.0487917	0.274455	0.741597	0.880537	-0.165164	0.500895
WBGene00000879	cyn-3	protein_coding	V	15189927	15190926	1748.77	0.339648	0.143462	0.00498328	0.0327191	0.433217	0.154273
WBGene00000880	cyn-4	protein_coding	II	10870779	10872611	651.898	0.0941838	0.151061	0.453694	0.688175	0.135056	0.180249
WBGene00000881	cyn-5	protein_coding	I	15040474	15041274	3068.5	0.370008	0.135311	0.00140695	0.0121047	0.454896	0.142457
WBGene00000882	cyn-6	protein_coding	III	773414	774159	236.922	1.22758	0.288535	1.07126e-06	2.43338e-05	1.34359	0.275435	Up
WBGene00000883	cyn-7	protein_coding	V	15186582	15187378	9507.2	0.341406	0.128041	0.00222171	0.0176244	0.416279	0.136089
WBGene00000884	cyn-8	protein_coding	X	8911293	8914261	281.507	0.213117	0.183046	0.126771	0.326076	0.341358	0.223554
WBGene00000885	cyn-9	protein_coding	III	3697821	3699640	286.862	-0.376188	0.208479	0.0126705	0.0659045	-0.560616	0.224885
WBGene00000886	cyn-10	protein_coding	II	6912540	6913365	270.916	-0.163831	0.189597	0.245726	0.489206	-0.28184	0.2428
WBGene00000887	cyn-11	protein_coding	II	8715131	8716281	318.321	-0.0463165	0.182911	0.73728	0.878725	-0.0810109	0.241493
WBGene00000888	cyn-12	protein_coding	IV	7132132	7133217	291.52	-0.251602	0.190477	0.0777067	0.23868	-0.402657	0.228244
WBGene00000889	cyn-13	protein_coding	IV	17111081	17116657	633.484	0.130018	0.170885	0.333678	0.580994	0.205511	0.212583
WBGene00000890	sig-7	protein_coding	I	8646451	8651671	456.804	-0.184338	0.16719	0.166504	0.386619	-0.278776	0.201497
WBGene00000891	cyn-15	protein_coding	I	13566251	13572047	676.285	0.182357	0.149287	0.144002	0.353299	0.253761	0.173684
WBGene00000892	cyn-16	protein_coding	II	12028128	12036742	442.358	-0.106396	0.156727	0.407452	0.647778	-0.156791	0.189273
WBGene00000893	cyn-17	protein_coding	V	5799673	5805666	147.297	0.218597	0.477319	0.223227	0.4622	1.12498	0.923638
WBGene00000894	dab-1	protein_coding	II	8222386	8229153	3203.12	0.115197	0.122706	0.291131	0.540229	0.14483	0.137196
WBGene00000895	dac-1	protein_coding	III	816145	821730	34.812	0.136869	0.290431	0.378229	0.620974	0.427024	0.484613
WBGene00000896	dad-1	protein_coding	I	6553481	6554290	654.522	-0.0695788	0.146081	0.57204	0.775249	-0.097588	0.172707
WBGene00000897	daf-1	protein_coding	IV	132416	138081	499.617	0.077751	0.152128	0.537882	0.752697	0.112398	0.182459
WBGene00000898	daf-2	protein_coding	III	2994514	3040846	4017.16	-0.232059	0.165021	0.0796727	0.242621	-0.338594	0.193197
WBGene00000899	daf-3	protein_coding	X	817922	825475	438.286	-0.466691	0.23241	0.00398039	0.0278862	-0.666474	0.231438		Down
WBGene00000900	daf-4	protein_coding	III	5625135	5632323	718.299	-0.21282	0.157617	0.0988902	0.278755	-0.303741	0.184057
WBGene00000901	daf-5	protein_coding	II	14033216	14052304	764.148	-0.0995525	0.153294	0.432394	0.668727	-0.14428	0.183773
WBGene00000902	daf-6	protein_coding	X	14888488	14894326	83.9278	0.483724	0.435692	0.0271593	0.115503	1.02602	0.464427
WBGene00000903	daf-7	protein_coding	III	811844	813773	95.7819	0.0215761	0.2091	0.880351	0.949133	0.0458558	0.304641
WBGene00000904	daf-8	protein_coding	I	8584424	8587507	189.214	-0.441387	0.239756	0.00709455	0.0429197	-0.658273	0.244495		Down
WBGene00000905	daf-9	protein_coding	X	6196927	6200823	32.0092	2.26016	0.633425	4.73327e-06	9.18681e-05	2.67955	0.585532	Up
WBGene00000906	daf-10	protein_coding	IV	9136933	9146211	41.8206	-0.413544	0.419145	0.0453048	0.164744	-0.971852	0.485486
WBGene00000907	daf-11	protein_coding	V	11718102	11726071	63.5891	-0.939848	0.437279	0.00074303	0.00714353	-1.25353	0.371615		Down
WBGene00000908	daf-12	protein_coding	X	10635908	10666875	617.457	0.973296	0.277234	9.72732e-06	0.000174359	1.09563	0.247705	Up
WBGene00000910	daf-14	protein_coding	IV	10250627	10255852	168.48	-0.389487	0.233819	0.015031	0.0750367	-0.610048	0.25088
WBGene00000911	daf-15	protein_coding	IV	9386208	9394979	2824.91	0.0186512	0.143392	0.878188	0.948122	0.0258903	0.168924
WBGene00000912	daf-16	protein_coding	I	10750498	10776703	2329.96	-0.256809	0.140137	0.0317481	0.128836	-0.335668	0.156301
WBGene00000913	daf-18	protein_coding	IV	420011	425177	5438.74	0.207015	0.121429	0.0554696	0.18971	0.256023	0.133681
WBGene00000914	daf-19	protein_coding	II	10157520	10169346	505.507	-0.223067	0.180982	0.108299	0.295986	-0.351201	0.218696
WBGene00000915	hsp-90	protein_coding	V	14684918	14688545	28360	0.385745	0.12918	0.00056657	0.00572829	0.463809	0.134549
WBGene00000917	daf-25	protein_coding	I	332604	337845	359.617	-0.0392649	0.156699	0.759662	0.889704	-0.0584469	0.19105
WBGene00000920	daf-28	protein_coding	V	19815133	19816454	47.1708	0.949059	0.49372	0.00135704	0.0117734	1.34536	0.419947	Up
WBGene00000923	daf-31	protein_coding	IV	8290273	8291496	681.309	0.0538843	0.144262	0.659158	0.830808	0.0749928	0.170022
WBGene00000928	dao-2	protein_coding	II	4562950	4563461	528.073	0.733048	0.638804	0.0119977	0.0634721	1.55811	0.620215
WBGene00000929	dao-3	protein_coding	X	8084210	8086550	286.64	0.430086	0.22462	0.00651465	0.0402135	0.628361	0.230957	Up
WBGene00000930	dao-4	protein_coding	X	10075288	10076357	3.74434	0.221184	0.61404	0.210443	NA	1.91301	1.52754
WBGene00000931	dao-5	protein_coding	I	10187546	10190896	3614.52	0.301248	0.153699	0.0175022	0.0840551	0.404843	0.17039
WBGene00000932	dao-6	protein_coding	III	9735263	9736201	12.1755	0.279933	0.482649	0.144915	0.354586	1.1559	0.792945
WBGene00000933	dap-3	protein_coding	II	10581133	10582512	573.212	0.348717	0.160691	0.00736669	0.0441516	0.465525	0.173717
WBGene00000934	dat-1	protein_coding	III	9242975	9246802	52.6701	-0.267441	0.306947	0.116394	0.309634	-0.643334	0.409743
WBGene00000935	daz-1	protein_coding	II	5456305	5458609	2706.58	0.125133	0.138441	0.292643	0.541572	0.167974	0.15962
WBGene00000936	dbl-1	protein_coding	V	6758135	6760418	132.26	0.200143	0.211465	0.175686	0.399836	0.372074	0.274764
WBGene00000937	dbr-1	protein_coding	I	6490716	6492727	436.029	0.0875682	0.157811	0.496942	0.721813	0.130307	0.191822
WBGene00000938	dcp-66	protein_coding	I	7536104	7542159	1212.04	-0.169918	0.13499	0.145818	0.356244	-0.222934	0.153276
WBGene00000939	dcr-1	protein_coding	III	8071967	8080281	2079.54	0.163057	0.132345	0.157061	0.373264	0.21187	0.149729
WBGene00000940	dcs-1	protein_coding	V	20087848	20090743	417.294	0.0993972	0.157157	0.439665	0.675658	0.147037	0.190276
WBGene00000941	ddp-1	protein_coding	III	1859888	1860381	393.247	0.151756	0.179471	0.270602	0.516522	0.248932	0.225957
WBGene00000942	deb-1	protein_coding	IV	7085215	7094266	2913.99	-0.258046	0.157305	0.045066	0.16403	-0.359668	0.179472
WBGene00000950	deg-1	protein_coding	X	7753070	7774817	56.1379	-0.00271192	0.253588	0.985205	0.993361	-0.00815372	0.439702
WBGene00000951	deg-3	protein_coding	V	11412870	11415159	44.0727	0.012137	0.256862	0.93393	0.971485	0.0373281	0.45027
WBGene00000952	del-1	protein_coding	X	14268081	14277082	19.8643	0.0320862	0.314228	0.829405	0.926411	0.141564	0.657014
WBGene00000953	del-2	protein_coding	IV	9636905	9642025	32.8362	-0.134407	0.308625	0.390672	0.632211	-0.462159	0.538396
WBGene00000955	des-2	protein_coding	V	11415272	11421705	62.0731	0.0241002	0.239397	0.868794	0.943617	0.0647179	0.391776
WBGene00000958	dgk-1	protein_coding	X	983903	991456	392.617	-0.381259	0.196726	0.00920428	0.0520398	-0.547909	0.210381
WBGene00000959	dgk-2	protein_coding	X	4494876	4504388	440.267	-0.0396345	0.162196	0.761804	0.89073	-0.0608873	0.200874
WBGene00000960	dgk-3	protein_coding	III	9163068	9168196	30.6221	-0.309702	0.394624	0.100429	0.281898	-0.879699	0.535496
WBGene00000961	dgn-1	protein_coding	X	10920515	10928998	590.603	-0.0501957	0.178736	0.713746	0.863373	-0.0853294	0.232613
WBGene00000962	dhc-1	protein_coding	I	4386785	4401907	13091.8	0.33505	0.164444	0.0111626	0.0603759	0.456528	0.179908
WBGene00000963	dhp-1	protein_coding	I	7238993	7243967	276.598	-0.291802	0.197026	0.0448385	0.163401	-0.459933	0.229259
WBGene00000964	dhp-2	protein_coding	IV	9978122	9980775	183.483	-0.201212	0.193239	0.158848	0.375951	-0.341791	0.242584
WBGene00000965	dhs-1	protein_coding	I	5278803	5281519	467.39	-0.0986097	0.173043	0.465581	0.697872	-0.159658	0.218803
WBGene00000966	dhs-2	protein_coding	I	5354181	5357029	99.6368	-0.08852	0.212119	0.540887	0.754873	-0.185948	0.304099
WBGene00000967	dhs-3	protein_coding	I	8212362	8218324	506.632	0.315875	0.167629	0.0180581	0.0857927	0.440657	0.18637
WBGene00000968	dhs-4	protein_coding	I	9647603	9649238	34.8725	-0.00157699	0.268393	0.991423	0.996577	-0.0052788	0.491044
WBGene00000969	dhs-5	protein_coding	II	5453847	5455977	137.113	0.280078	0.227078	0.0698039	0.221225	0.498848	0.275123
WBGene00000970	dhs-6	protein_coding	II	5617128	5619319	780.632	-0.200257	0.161973	0.126315	0.325212	-0.293165	0.191762
WBGene00000971	dhs-7	protein_coding	II	7206990	7208460	28.056	-0.0596608	0.293156	0.689516	0.849214	-0.22374	0.560033
WBGene00000972	dhs-8	protein_coding	II	14498026	14499755	17.7098	0.348101	0.484223	0.0894592	0.260997	1.15199	0.678337
WBGene00000973	dhs-9	protein_coding	III	5364512	5368045	242.525	0.244293	0.180267	0.0783991	0.239959	0.377089	0.214249
WBGene00000974	dhs-11	protein_coding	III	10640836	10642865	192.627	-0.00822438	0.197228	0.953603	0.980543	-0.0160089	0.275148
WBGene00000975	dhs-12	protein_coding	IV	10142455	10146225	470.275	-0.0582824	0.15303	0.645357	0.822273	-0.0848667	0.184404
WBGene00000976	dhs-13	protein_coding	V	1765311	1771734	948.82	0.352372	0.143701	0.00358498	0.0257696	0.446939	0.153453
WBGene00000977	dhs-14	protein_coding	V	2763981	2765200	145.147	-0.00724747	0.192236	0.958806	0.983418	-0.0136024	0.263347
WBGene00000978	dhs-15	protein_coding	V	2768361	2769854	21.1805	-0.200788	0.37487	0.239044	0.481294	-0.746905	0.63438
WBGene00000979	dhs-16	protein_coding	V	5983745	5985509	25.6252	0.196327	0.363785	0.245153	0.488293	0.709886	0.61081
WBGene00000980	dhs-17	protein_coding	V	6026329	6034814	154.536	-0.448013	0.269655	0.0101502	0.056036	-0.706638	0.274885
WBGene00000981	dhs-18	protein_coding	V	11045705	11046833	341.585	-0.484033	0.273945	0.00641899	0.0398137	-0.736191	0.270105		Down
WBGene00000982	dhs-19	protein_coding	V	11489048	11490482	199.619	-0.188872	0.19253	0.184711	0.412248	-0.32326	0.243715
WBGene00000983	dhs-20	protein_coding	V	11602294	11604563	114.483	-0.512997	0.349197	0.0112337	0.0606544	-0.869284	0.342867
WBGene00000984	dhs-21	protein_coding	V	12731767	12733645	168.093	-0.726231	0.320339	0.000630475	0.00625983	-0.949555	0.277798		Down
WBGene00000985	dhs-22	protein_coding	V	14420071	14421440	1056.41	0.00777831	0.141672	0.948638	0.97822	0.010707	0.166213
WBGene00000986	dhs-23	protein_coding	V	15381219	15382271	10.546	-0.214564	0.460727	0.228504	0.468437	-1.05375	0.875051
WBGene00000987	dhs-24	protein_coding	V	19934767	19946629	581.906	0.280937	0.162522	0.0323118	0.13047	0.394115	0.18412
WBGene00000988	dhs-25	protein_coding	X	1486532	1489326	1200.11	1.00761	0.292638	1.33127e-05	0.000229581	1.14002	0.261778	Up
WBGene00000989	dhs-26	protein_coding	X	3360722	3362493	10.3563	0.146724	0.416331	0.372492	0.616612	0.788481	0.884131
WBGene00000990	dhs-27	protein_coding	X	3412876	3414710	97.7658	0.285501	0.261986	0.0802537	0.243995	0.568826	0.325189
WBGene00000991	dhs-28	protein_coding	X	6818438	6820080	1457.64	0.243056	0.138343	0.0404243	0.152027	0.317082	0.15472
WBGene00000992	dhs-29	protein_coding	X	7661891	7664919	99.4117	0.25486	0.255185	0.110929	0.300361	0.524382	0.328966
WBGene00000993	dhs-30	protein_coding	X	17230725	17235838	248.993	-0.077617	0.178964	0.571128	0.774573	-0.131214	0.231667
WBGene00000994	ints-6	protein_coding	IV	8691745	8696564	546.28	-0.0202924	0.15086	0.871613	0.944481	-0.029283	0.181195
WBGene00000995	die-1	protein_coding	II	10061302	10067917	688.404	0.0889691	0.157201	0.489151	0.715307	0.131917	0.190726
WBGene00000996	dif-1	protein_coding	IV	7551560	7553008	769.839	0.171268	0.151026	0.173078	0.396556	0.241068	0.176946
WBGene00000998	dig-1	protein_coding	III	6746308	6794764	12360.3	-0.0094631	0.163381	0.942513	0.976082	-0.0146669	0.203393
WBGene00001000	dim-1	protein_coding	X	8050466	8058220	2506.12	0.171863	0.152682	0.174432	0.398106	0.243731	0.179465
WBGene00001001	dis-3	protein_coding	IV	10097202	10106523	1218.55	0.119075	0.136778	0.312696	0.561931	0.158792	0.157285
WBGene00001002	div-1	protein_coding	III	10245056	10248559	684.958	0.195621	0.153891	0.123913	0.321611	0.276613	0.179787
WBGene00001005	dlc-1	protein_coding	III	6462963	6463779	2071.83	0.0518657	0.139888	0.664938	0.835431	0.0706574	0.163141
WBGene00001006	dlg-1	protein_coding	X	5479700	5484941	1766.44	-0.319218	0.191428	0.0263251	0.112617	-0.480114	0.216133
WBGene00001007	dli-1	protein_coding	IV	13096982	13098792	888.171	0.478553	0.16744	0.000326962	0.00364919	0.594784	0.165542	Up
WBGene00001008	dlk-1	protein_coding	I	12565800	12572801	842.404	-0.000176298	0.137821	0.998814	0.999363	-0.000238181	0.160194
WBGene00001016	dna-2	protein_coding	II	11778430	11782396	1189.68	0.104871	0.140543	0.382625	0.624551	0.142563	0.163289
WBGene00001017	dnc-1	protein_coding	IV	10926720	10933203	1894.36	0.194057	0.130594	0.0889302	0.260099	0.248929	0.146337
WBGene00001018	dnc-2	protein_coding	III	5924394	5925756	593.711	0.058393	0.172469	0.66482	0.835431	0.0952129	0.219755
WBGene00001019	dnj-1	protein_coding	IV	11299036	11304788	645.846	-0.0631039	0.142251	0.602219	0.796399	-0.0868886	0.166705
WBGene00001020	dnj-2	protein_coding	IV	11312476	11313980	374.876	0.289396	0.189075	0.0423046	0.156763	0.444378	0.21885
WBGene00001021	dnj-3	protein_coding	V	15068678	15069507	76.8595	-0.133198	0.242405	0.375832	0.619374	-0.322088	0.363693
WBGene00001022	dnj-4	protein_coding	I	5282083	5283944	164.639	0.0490486	0.199061	0.729642	0.873391	0.0959789	0.277715
WBGene00001023	dnj-5	protein_coding	II	6853461	6858301	3775.21	0.138896	0.130159	0.222725	0.46184	0.179519	0.14723
WBGene00001025	dnj-7	protein_coding	X	7194564	7198291	499.405	0.435973	0.174093	0.00140662	0.0121047	0.566004	0.177248
WBGene00001026	dnj-8	protein_coding	II	6594382	6598080	1011.77	-0.109862	0.134579	0.346276	0.593438	-0.14525	0.15422
WBGene00001027	dnj-9	protein_coding	II	4852056	4857820	792.17	0.240464	0.146328	0.0508134	0.178465	0.323723	0.165752
WBGene00001028	dnj-10	protein_coding	III	8631165	8633565	533.691	0.210332	0.15308	0.0969764	0.275101	0.294638	0.177526
WBGene00001029	dnj-11	protein_coding	IV	6585871	6588186	1847.83	0.117169	0.130523	0.304739	0.554002	0.152078	0.148177
WBGene00001030	dnj-12	protein_coding	I	14756904	14758790	2497.65	0.0709958	0.122865	0.515836	0.737407	0.0895873	0.137874
WBGene00001031	dnj-13	protein_coding	II	11545701	11547360	2256.94	0.0998058	0.124619	0.365988	0.611342	0.126607	0.140049
WBGene00001032	dnj-14	protein_coding	X	4709741	4711748	250.056	0.0241211	0.174525	0.858611	0.938116	0.0400427	0.224778
WBGene00001033	dnj-15	protein_coding	IV	4176388	4178364	219.611	-0.164693	0.196613	0.249942	0.494102	-0.294232	0.255745
WBGene00001034	dnj-16	protein_coding	III	4191141	4193429	622.219	-0.077156	0.162091	0.55519	0.76401	-0.117823	0.199699
WBGene00001035	dnj-17	protein_coding	III	13390850	13393339	469.498	0.0439872	0.155283	0.730498	0.873874	0.0649355	0.188512
WBGene00001036	dnj-18	protein_coding	III	4698119	4699380	228.335	-0.0751297	0.178225	0.582839	0.78345	-0.12651	0.230336
WBGene00001037	dnj-19	protein_coding	V	5503033	5504857	2535.04	0.220549	0.124916	0.0456696	0.165519	0.275489	0.137852
WBGene00001038	dnj-20	protein_coding	II	9617469	9624176	2465.64	-0.023161	0.137292	0.844738	0.932377	-0.0312025	0.15933
WBGene00001039	dnj-21	protein_coding	I	5676827	5677646	134.398	0.0423641	0.213266	0.768721	0.894624	0.0923404	0.314031
WBGene00001040	dnj-22	protein_coding	V	8461113	8462120	423.615	-0.208978	0.170467	0.120792	0.316862	-0.316646	0.204096
WBGene00001041	dnj-23	protein_coding	II	9107382	9108600	522.447	-0.0505859	0.165108	0.701489	0.856189	-0.0789611	0.205997
WBGene00001042	dnj-24	protein_coding	III	5415583	5424083	244.884	0.209409	0.197348	0.146431	0.35666	0.35999	0.247884
WBGene00001043	dnj-25	protein_coding	V	20729948	20744346	900.612	0.131676	0.145835	0.284436	0.532423	0.18271	0.170692
WBGene00001044	dnj-26	protein_coding	IV	12251093	12252679	214.49	-0.266932	0.222737	0.0807197	0.244978	-0.4767	0.272942
WBGene00001045	dnj-27	protein_coding	I	11877803	11887278	359.162	0.489142	0.252389	0.00408318	0.0283877	0.709298	0.246999	Up
WBGene00001046	dnj-28	protein_coding	I	2996488	3001382	289.232	0.103878	0.171955	0.440829	0.676425	0.166816	0.216421
WBGene00001047	dnj-29	protein_coding	I	14104515	14113108	1867.45	0.536686	0.146855	1.03896e-05	0.000185157	0.622475	0.141186	Up
WBGene00001048	dnj-30	protein_coding	I	2718027	2721475	315.837	-0.139709	0.177608	0.307866	0.557085	-0.228298	0.223885
WBGene00001049	dog-1	protein_coding	I	15017283	15022990	723.72	0.18959	0.143982	0.120067	0.315602	0.257185	0.165446
WBGene00001050	dom-3	protein_coding	I	5003450	5004933	257.775	-0.0630234	0.171664	0.639373	0.818703	-0.102157	0.218016
WBGene00001051	cks-1	protein_coding	IV	8513919	8514725	983.182	-0.135806	0.148996	0.276025	0.523008	-0.191148	0.175479
WBGene00001052	dop-1	protein_coding	X	4411301	4418851	66.6612	-0.0394014	0.230041	0.786702	0.903816	-0.0977412	0.361207
WBGene00001053	dop-2	protein_coding	V	9608556	9614940	82.656	-0.178221	0.230438	0.237777	0.479867	-0.375494	0.318064
WBGene00001054	dpf-1	protein_coding	V	15471329	15476124	124.352	0.0730264	0.212818	0.61337	0.802696	0.155942	0.308631
WBGene00001055	dpf-2	protein_coding	X	14831831	14838191	403.783	-0.34224	0.180667	0.014117	0.0716454	-0.48729	0.198548
WBGene00001056	dpf-3	protein_coding	I	6838354	6843343	2551.26	0.0997626	0.12341	0.362722	0.607748	0.125935	0.138361
WBGene00001057	dpf-4	protein_coding	III	5859308	5861908	859.393	0.0843915	0.138867	0.478846	0.708004	0.114102	0.161124
WBGene00001058	dpf-5	protein_coding	IV	4802702	4806586	2179.55	0.158808	0.134786	0.173649	0.397194	0.208616	0.153329
WBGene00001059	dpf-6	protein_coding	III	8038241	8041329	212.166	1.02733	0.256139	1.71204e-06	3.68852e-05	1.12622	0.235377	Up
WBGene00001060	dpf-7	protein_coding	IV	4799384	4802594	634.836	0.0939494	0.147189	0.447652	0.68298	0.1321	0.173968
WBGene00001061	dpl-1	protein_coding	II	9169910	9172565	1036.72	0.210908	0.135569	0.0716255	0.225427	0.274792	0.152536
WBGene00001063	dpy-1	protein_coding	III	2034988	2048007	361.032	0.308274	0.498919	0.12061	0.316546	1.21369	0.781908
WBGene00001064	dpy-2	protein_coding	II	6714292	6715971	458.42	1.20532	0.685186	0.00144704	0.012415	1.85353	0.581939
WBGene00001065	dpy-3	protein_coding	X	2144605	2145647	386.778	0.678564	0.70932	0.0190291	0.0891193	1.77882	0.758573
WBGene00001066	dpy-4	protein_coding	IV	14985543	14986784	2430.05	5.55147	0.218905	1.28913e-143	9.97076e-140	5.594	0.21923	Up
WBGene00001067	dpy-5	protein_coding	I	5432197	5433051	1713.69	5.24395	0.25047	6.79323e-99	1.75141e-95	5.29843	0.251022	Up
WBGene00001068	dpy-6	protein_coding	X	8450381	8455640	378.216	1.38372	0.728204	0.000845087	0.00795173	2.05463	0.615604	Up
WBGene00001069	dpy-7	protein_coding	X	7536467	7537792	451.922	1.25888	0.659719	0.000981653	0.00904419	1.84504	0.559828	Up
WBGene00001070	dpy-8	protein_coding	X	5148804	5150476	390.576	3.46292	0.629074	5.52366e-10	2.26046e-08	3.78117	0.609527	Up
WBGene00001071	dpy-9	protein_coding	IV	257403	259204	235.511	3.78763	0.32886	4.34523e-32	1.01612e-29	3.87188	0.328377	Up
WBGene00001072	dpy-10	protein_coding	II	6710149	6712227	336.011	0.437202	0.483824	0.0469561	0.168335	1.14142	0.574533
WBGene00001073	dpy-11	protein_coding	V	6511583	6515240	1195.01	0.940581	0.158896	1.00533e-10	4.52079e-09	0.980229	0.151594	Up
WBGene00001074	dpy-13	protein_coding	IV	4235614	4236710	2257.5	5.00621	0.492137	8.25844e-26	1.34473e-23	5.21471	0.496439	Up
WBGene00001075	dpy-14	protein_coding	I	6843589	6845142	1497.64	-2.81734	0.9044	1.22562e-05	0.000213819	-3.499	0.800141		Down
WBGene00001076	dpy-17	protein_coding	III	5107330	5108492	1953.02	-2.0494	0.887801	0.000161574	0.00199632	-2.82032	0.747586		Down
WBGene00001077	dpy-18	protein_coding	III	11372886	11377980	541.676	1.26932	0.228756	3.18938e-09	1.16086e-07	1.34134	0.226519	Up
WBGene00001078	dpy-19	protein_coding	III	8659872	8667482	117.699	-0.0836857	0.204847	0.559653	0.767012	-0.167736	0.287535
WBGene00001079	dpy-20	protein_coding	IV	11696430	11700852	42.1738	2.79456	0.52244	1.00781e-09	3.93683e-08	3.04664	0.498782	Up
WBGene00001080	dpy-21	protein_coding	V	17936282	17949193	2609.09	0.0688295	0.154787	0.589267	0.788325	0.101053	0.18717
WBGene00001081	dpy-22	protein_coding	X	9810202	9822273	2124	0.0253019	0.164761	0.847763	0.932853	0.0395134	0.205828
WBGene00001082	dpy-23	protein_coding	X	4389359	4393803	535.522	0.188065	0.159475	0.147455	0.357873	0.273652	0.18891
WBGene00001085	dpy-26	protein_coding	IV	12445801	12451335	1713.42	0.142915	0.127004	0.201568	0.435491	0.18225	0.142707
WBGene00001086	dpy-27	protein_coding	III	3813018	3819679	1082.69	-0.0360144	0.158957	0.780701	0.901379	-0.0543137	0.195089
WBGene00001087	dpy-28	protein_coding	III	10763131	10777076	1935.24	0.00191773	0.126712	0.986313	0.993794	0.00246376	0.143622
WBGene00001088	dpy-30	protein_coding	V	12191519	12192385	805.254	0.0334039	0.137337	0.77765	0.900265	0.0449967	0.159346
WBGene00001089	dre-1	protein_coding	V	6533614	6546500	966.98	0.377038	0.178254	0.00646386	0.0399903	0.517834	0.190151
WBGene00001090	drh-1	protein_coding	IV	6607376	6613353	680.704	0.168404	0.154482	0.186337	0.414621	0.241134	0.182471
WBGene00001091	drh-2	pseudogene	IV	6613918	6618498	290.702	0.196183	0.228382	0.195014	0.426869	0.398082	0.307188
WBGene00001092	dro-1	protein_coding	III	13342684	13343712	455.398	0.0821232	0.162014	0.529943	0.747347	0.125232	0.199384
WBGene00001093	drp-1	protein_coding	IV	5538488	5541365	1548.13	0.327008	0.143534	0.00692364	0.0422326	0.419737	0.15543
WBGene00001094	dars-1	protein_coding	III	9489176	9491215	2173.41	0.24875	0.133673	0.0316768	0.128645	0.318435	0.148215
WBGene00001095	dars-2	protein_coding	V	12048745	12052181	299.997	0.0181681	0.177737	0.894069	0.955255	0.0308157	0.231424
WBGene00001096	dsc-1	protein_coding	X	15031180	15034832	4.31064	-0.123724	0.501747	0.436125	NA	-1.07659	1.38245
WBGene00001099	dsc-4	protein_coding	IV	315056	320544	1046.99	0.339994	0.176051	0.0133572	0.0685772	0.478261	0.193307
WBGene00001101	dsh-1	protein_coding	II	5214400	5225384	535.672	-0.260323	0.173477	0.0558602	0.190583	-0.386099	0.201921
WBGene00001102	dsh-2	protein_coding	II	5078233	5081174	944.444	0.0768808	0.145139	0.530735	0.74784	0.107236	0.171062
WBGene00001103	dsl-1	protein_coding	IV	1207218	1208080	12.0331	0.0575971	0.374661	0.705438	0.857962	0.337089	0.891795
WBGene00001104	dsl-2	protein_coding	IV	1202651	1204970	64.3216	-0.0102722	0.27184	0.944233	0.976436	-0.035175	0.502853
WBGene00001105	dsl-3	protein_coding	IV	1610273	1612924	30.4638	-2.15653	0.670796	1.57275e-05	0.000264731	-2.6298	0.608998		Down
WBGene00001106	dsl-4	protein_coding	X	14090389	14092054	1.2242	-0.0648457	0.590228	0.628975	NA	-1.2004	2.48443
WBGene00001107	dsl-5	protein_coding	IV	11619363	11621009	3.27185	0.0976626	0.511824	0.522702	NA	1.00072	1.56561
WBGene00001108	dsl-6	protein_coding	IV	11396765	11398317	26.9937	-3.37115	0.934348	2.31564e-06	4.80815e-05	-4.05921	0.859325		Down
WBGene00001109	dsl-7	protein_coding	V	12993150	12994824	14.9134	-0.253218	0.464349	0.172972	0.39646	-1.08384	0.795351
WBGene00001110	duo-1	protein_coding	V	11554630	11558127	557.278	0.0150941	0.157125	0.906514	0.960075	0.022553	0.192043
WBGene00001111	duo-2	pseudogene	IV	112408	118629	6.7089	0.0109395	0.410525	0.941824	0.975789	0.0819434	1.12286
WBGene00001112	duo-3	protein_coding	I	10464289	10471056	884.562	-0.0130246	0.145977	0.915718	0.963098	-0.0183216	0.173125
WBGene00001113	dur-1	protein_coding	IV	9921938	9928230	666.245	0.754249	0.216036	7.23339e-06	0.000133844	0.859346	0.191532	Up
WBGene00001115	dyb-1	protein_coding	I	1483083	1490498	184.019	-0.275352	0.257287	0.088335	0.259044	-0.549907	0.322669
WBGene00001116	dyc-1	protein_coding	X	14049535	14063930	347.599	-0.211618	0.202189	0.146238	0.356364	-0.371361	0.255592
WBGene00001117	dyf-1	protein_coding	I	4989548	4994675	47.0294	-0.459715	0.406935	0.0287712	0.120222	-0.95691	0.437623
WBGene00001118	dyf-2	protein_coding	III	13674879	13686445	118.557	-0.594519	0.336998	0.00391712	0.0275052	-0.892179	0.309273		Down
WBGene00001119	dyf-3	protein_coding	IV	3396581	3399231	51.624	-0.0831313	0.246757	0.574764	0.777596	-0.223121	0.397685
WBGene00001121	dyf-5	protein_coding	I	9359067	9364238	37.2487	-0.365166	0.412951	0.066429	0.213681	-0.944976	0.514828
WBGene00001122	dyf-6	protein_coding	X	10379693	10386508	34.3799	-0.198572	0.317007	0.227218	0.467111	-0.592101	0.490329
WBGene00001123	dyf-7	protein_coding	X	9698659	9701732	53.6714	-1.75103	0.593175	5.15093e-05	0.000741701	-2.17133	0.536308		Down
WBGene00001127	dyf-11	protein_coding	X	763752	766739	24.1073	-0.480879	0.556693	0.0420214	0.156145	-1.35332	0.665575
WBGene00001129	dyf-13	protein_coding	II	7168793	7171355	18.1402	-0.448528	0.538003	0.0497459	0.175843	-1.30331	0.664227
WBGene00001130	dyn-1	protein_coding	X	15568890	15573021	1432.04	-0.030051	0.149725	0.810015	0.916531	-0.0430851	0.179218
WBGene00001131	dys-1	protein_coding	I	11526918	11557851	2751.63	0.147322	0.175197	0.279411	0.527361	0.236615	0.218755
WBGene00001132	alp-1	protein_coding	IV	8852494	8862246	914.954	0.361707	0.201771	0.0146253	0.0736456	0.537518	0.220157
WBGene00001133	eat-2	protein_coding	II	14166878	14171658	16.4799	-0.0739712	0.34098	0.627911	0.812136	-0.351484	0.725203
WBGene00001134	eat-3	protein_coding	II	9324874	9329665	1433.32	0.147284	0.13198	0.200414	0.434107	0.191578	0.149627
WBGene00001135	eat-4	protein_coding	III	9136887	9141827	119.359	-0.592469	0.304598	0.00239342	0.0187367	-0.845087	0.278309		Down
WBGene00001136	eat-5	protein_coding	I	7308643	7311915	19.8073	-0.0689932	0.323373	0.648621	0.824582	-0.302023	0.662798
WBGene00001137	eat-6	protein_coding	V	13126414	13129995	12680	0.192612	0.146421	0.118209	0.31247	0.26381	0.168856
WBGene00001145	eat-16	protein_coding	I	9722716	9726284	469.408	-0.41743	0.186973	0.00339893	0.024673	-0.566413	0.193371
WBGene00001147	eat-18	protein_coding	I	14391860	14400222	22.6176	-0.0153123	0.291429	0.917363	0.963786	-0.059599	0.574412
WBGene00001148	eat-20	protein_coding	X	15510011	15524030	527.437	0.806253	0.262452	3.75556e-05	0.000566226	0.943315	0.228847	Up
WBGene00001149	bcat-1	protein_coding	X	12877480	12880328	1941.86	0.0010975	0.124328	0.992057	0.996763	0.00139584	0.140211
WBGene00001150	ech-1.1	protein_coding	V	15357664	15361512	142.395	-0.619639	0.353279	0.00371326	0.0264215	-0.930109	0.320556		Down
WBGene00001151	ech-2	protein_coding	IV	11854993	11856351	259.906	0.273228	0.201627	0.0625688	0.205975	0.446886	0.239972
WBGene00001152	ech-3	protein_coding	V	8022217	8023317	73.396	-0.390802	0.319756	0.0337808	0.134232	-0.754897	0.355634
WBGene00001153	ech-4	protein_coding	II	10821031	10822391	889.016	0.132994	0.146823	0.281691	0.529557	0.185359	0.172182
WBGene00001154	ech-5	protein_coding	IV	797023	799920	438.602	0.307	0.171513	0.0233422	0.10355	0.436693	0.192563
WBGene00001155	ech-6	protein_coding	III	9751552	9752883	3997.27	1.12809	0.14606	1.80024e-15	1.37861e-13	1.15658	0.145401	Up
WBGene00001156	ech-7	protein_coding	I	14367616	14369773	855.57	-0.0760502	0.187797	0.585905	0.785454	-0.13624	0.250083
WBGene00001157	ech-8	protein_coding	IV	10236626	10239176	130.845	-0.311789	0.244014	0.0517401	0.180751	-0.560512	0.288138
WBGene00001158	ech-9	protein_coding	IV	10233310	10235329	53.9798	-1.58656	0.52968	5.54157e-05	0.000790798	-1.94154	0.48159		Down
WBGene00001159	eff-1	protein_coding	II	8346684	8350563	113.19	0.182148	0.227864	0.226693	0.466441	0.376513	0.311445
WBGene00001160	efk-1	protein_coding	III	6164906	6168547	1446.24	-0.386765	0.150098	0.00185993	0.0153038	-0.489958	0.157455
WBGene00001161	efl-1	protein_coding	V	16958590	16965675	519.21	0.162015	0.157213	0.208221	0.443866	0.235573	0.18719
WBGene00001162	efl-2	protein_coding	II	13406140	13411895	274.102	0.0556277	0.167962	0.675996	0.841405	0.0882677	0.211201
WBGene00001163	efn-2	protein_coding	IV	10576350	10578288	131.705	0.0205991	0.194538	0.883718	0.950882	0.039267	0.268477
WBGene00001164	efn-3	protein_coding	X	13475876	13477456	14.0867	-0.104552	0.384184	0.506742	0.730005	-0.564314	0.849974
WBGene00001165	efn-4	protein_coding	IV	559234	568147	122.975	-0.287336	0.267644	0.080801	0.24506	-0.581386	0.332971
WBGene00001166	eftu-2	protein_coding	III	6009560	6012840	2214.25	0.502048	0.148402	4.24424e-05	0.000628871	0.594206	0.145149	Up
WBGene00001167	eef-2	protein_coding	I	9163531	9166952	49618.6	0.393794	0.136439	0.00071094	0.00692104	0.480327	0.141885
WBGene00001168	eef-1A.1	protein_coding	III	6970026	6971712	79071.6	0.361227	0.148921	0.00353637	0.0255388	0.462769	0.158656
WBGene00001169	eef-1A.2	protein_coding	X	7823654	7825769	8998.48	1.26596	0.182602	6.97411e-13	3.86676e-11	1.31141	0.182649	Up
WBGene00001170	egl-1	protein_coding	V	14431308	14432359	7.85851	-0.367304	0.608431	0.0891435	0.260569	-1.64401	0.9671
WBGene00001171	egl-2	protein_coding	V	1289373	1299332	207.819	-0.340965	0.226539	0.0291611	0.121365	-0.557434	0.255551
WBGene00001172	egl-3	protein_coding	V	10169177	10173753	1990.62	-0.294823	0.161427	0.0240795	0.10576	-0.408427	0.181052
WBGene00001173	egl-4	protein_coding	IV	1848071	1880596	4149.31	0.0726058	0.128803	0.520942	0.740789	0.093912	0.146305
WBGene00001174	egl-5	protein_coding	III	7814374	7817141	45.5682	-0.0585396	0.250175	0.691082	0.850013	-0.165872	0.417406
WBGene00001175	egl-6	protein_coding	X	5931122	5934532	41.2465	-0.121205	0.281482	0.42886	0.665573	-0.374538	0.473414
WBGene00001177	egl-8	protein_coding	V	20818	43704	2042.95	-0.229337	0.153714	0.0710035	0.224062	-0.319532	0.176982
WBGene00001178	egl-9	protein_coding	V	10468517	10476915	471.102	-0.290999	0.174519	0.0332396	0.132797	-0.423421	0.198866
WBGene00001179	egl-10	protein_coding	V	12453290	12463008	544.63	-0.181992	0.163224	0.166424	0.386619	-0.270293	0.195329
WBGene00001182	egl-13	protein_coding	X	5663837	5674067	253.404	0.00908237	0.195411	0.948638	0.97822	0.0174432	0.270785
WBGene00001184	egl-15	protein_coding	X	11016400	11023421	294.966	-0.271792	0.199757	0.0628006	0.206387	-0.442084	0.237603
WBGene00001185	egl-17	protein_coding	X	489685	492318	5.24816	0.0599022	0.439155	0.69352	0.851227	0.482307	1.22387
WBGene00001186	egl-18	protein_coding	IV	1902322	1917840	465.538	-0.0264587	0.175121	0.845303	0.932377	-0.0440837	0.225937
WBGene00001187	egl-19	protein_coding	IV	7405582	7418740	1147.11	-0.0779728	0.167812	0.558002	0.76598	-0.123077	0.210096
WBGene00001188	egl-20	protein_coding	IV	9812357	9815532	156.747	-0.201509	0.207568	0.170022	0.392371	-0.366975	0.267448
WBGene00001189	egl-21	protein_coding	IV	10478442	10481844	1300.87	-0.297668	0.152118	0.0181358	0.0860562	-0.398659	0.168721
WBGene00001190	egl-23	protein_coding	IV	13989081	14012074	77.318	-0.170115	0.246078	0.266333	0.51182	-0.393625	0.354124
WBGene00001193	egl-26	protein_coding	II	69654	71279	211.17	-0.266716	0.203692	0.0701149	0.221892	-0.442936	0.244559
WBGene00001194	egl-27	protein_coding	II	6835008	6847908	2607.71	-0.206114	0.132037	0.0729396	0.228415	-0.265188	0.147885
WBGene00001196	egl-30	protein_coding	I	1835661	1841965	2851.15	0.147201	0.163665	0.263406	0.508503	0.222296	0.198767
WBGene00001202	egl-36	protein_coding	X	10734326	10744355	33.3208	-0.0947723	0.288034	0.531585	0.748327	-0.322286	0.515173
WBGene00001204	egl-38	protein_coding	IV	10106599	10110517	31.5328	-0.194573	0.344	0.243479	0.48636	-0.654247	0.560942
WBGene00001207	egl-43	protein_coding	II	9955185	9963020	176.931	-0.426892	0.272681	0.0142047	0.0720199	-0.697332	0.284388
WBGene00001208	egl-44	protein_coding	II	5928802	5940830	401.817	-0.227802	0.169266	0.0897449	0.261542	-0.339381	0.200019
WBGene00001209	egl-45	protein_coding	III	7824377	7828626	4871.8	0.362613	0.136427	0.00187495	0.015411	0.448598	0.144274
WBGene00001210	egl-46	protein_coding	V	6679123	6681573	125.741	-0.370931	0.5784	0.0858556	0.254506	-1.50235	0.87464
WBGene00001211	egl-47	protein_coding	V	9899578	9907647	24.4259	-0.183047	0.340437	0.267278	0.51266	-0.628768	0.566788
WBGene00001214	ego-1	protein_coding	I	7650341	7656338	1970.17	0.123645	0.133666	0.286827	0.535214	0.162537	0.152601
WBGene00001215	ego-2	protein_coding	I	11400143	11416433	1471.17	0.371565	0.15007	0.00281761	0.0211992	0.474759	0.158944
WBGene00001223	ehn-3	protein_coding	IV	5416699	5419222	3.41615	-0.232888	0.68594	0.179911	NA	-2.52472	1.88267
WBGene00001224	ehs-1	protein_coding	II	5820712	5823862	1050.85	0.0195626	0.143158	0.872154	0.944497	0.0271227	0.168544
WBGene00001225	eif-3.B	protein_coding	II	14795404	14798235	3158.86	0.44212	0.133569	0.000106515	0.00139397	0.524008	0.135219
WBGene00001226	eif-3.C	protein_coding	I	9976426	9979662	4084.62	0.426628	0.131924	0.000164297	0.00202349	0.507385	0.134642
WBGene00001227	eif-3.D	protein_coding	III	8969635	8971578	2124.31	0.378265	0.138939	0.00134445	0.0116905	0.467693	0.145866
WBGene00001228	eif-3.E	protein_coding	I	10640465	10642281	1522.72	0.300706	0.146947	0.0146395	0.0736929	0.395161	0.161873
WBGene00001229	eif-3.F	protein_coding	II	9331643	9333970	1242.09	0.0794377	0.144329	0.51567	0.737407	0.110326	0.169723
WBGene00001230	eif-3.G	protein_coding	II	8442767	8444175	998.831	0.187149	0.134507	0.108178	0.295759	0.24418	0.152001
WBGene00001231	eif-3.H	protein_coding	I	4444719	4446613	1172.05	0.339344	0.142879	0.0049036	0.0324161	0.432151	0.15361
WBGene00001232	eif-3.I	protein_coding	I	2485861	2489787	1356.42	0.421164	0.149979	0.00067999	0.00664483	0.522969	0.153927
WBGene00001233	eif-3.K	protein_coding	V	12954002	12955229	720.293	0.305223	0.16376	0.0205588	0.0942397	0.423408	0.182819
WBGene00001234	eif-6	protein_coding	I	12968946	12970272	873.581	0.614104	0.177976	1.25844e-05	0.000218728	0.715369	0.163805	Up
WBGene00001235	elb-1	protein_coding	III	11718834	11719450	351.008	0.300339	0.179849	0.0306587	0.125399	0.441979	0.20448
WBGene00001236	elc-1	protein_coding	III	1414238	1417190	641.889	-0.0200789	0.145483	0.870131	0.943969	-0.0281684	0.172291
WBGene00001237	elc-2	protein_coding	X	1777288	1778088	2.90731	-0.214281	0.622464	0.217676	NA	-1.99111	1.61521
WBGene00001239	elo-1	protein_coding	IV	9526366	9528336	2862.35	0.128494	0.163951	0.329193	0.576734	0.195633	0.200497
WBGene00001240	elo-2	protein_coding	IV	17466062	17467408	1466.93	0.341214	0.206771	0.0226335	0.101249	0.526008	0.230749
WBGene00001241	elo-3	protein_coding	IV	7237718	7240488	1060.18	0.184075	0.141046	0.126083	0.325016	0.246959	0.161439
WBGene00001242	elo-4	protein_coding	III	9332269	9334274	46.981	0.323775	0.388519	0.0877246	0.257742	0.869708	0.509339
WBGene00001243	elo-5	protein_coding	IV	5374616	5377117	1184.11	0.3945	0.231992	0.0135113	0.0692076	0.611263	0.247475
WBGene00001244	elo-6	protein_coding	IV	5386629	5388559	2240.54	0.584462	0.266358	0.00119785	0.0106737	0.790326	0.243974	Up
WBGene00001245	elo-7	protein_coding	IV	9529947	9531400	5.369	0.0276775	0.440069	0.853014	0.936034	0.238276	1.28607
WBGene00001246	elo-8	protein_coding	III	11230377	11232069	7.26552	0.0732681	0.434235	0.633545	0.815675	0.554922	1.16398
WBGene00001247	elo-9	protein_coding	II	14959526	14964108	105.231	0.636191	0.336456	0.00241382	0.0188392	0.914898	0.301554
WBGene00001248	elp-1	protein_coding	V	20764971	20770161	128.466	-0.275222	0.237092	0.0793497	0.241912	-0.511866	0.291749
WBGene00001249	elt-1	protein_coding	IV	9614995	9620280	164.061	-0.16162	0.196864	0.258923	0.503873	-0.289924	0.256811
WBGene00001250	elt-2	protein_coding	X	10481240	10483441	149.189	-0.0763826	0.195184	0.589076	0.788271	-0.143812	0.266232
WBGene00001251	elt-3	protein_coding	X	13934874	13941216	213.853	-0.076259	0.181337	0.579896	0.781599	-0.130946	0.236563
WBGene00001252	elt-4	protein_coding	X	10475527	10475959	5.21901	-0.216128	0.554327	0.225855	0.465214	-1.5146	1.25059
WBGene00001253	elt-6	protein_coding	IV	1917977	1921643	113.435	-0.138994	0.234235	0.353089	0.59941	-0.317484	0.34189
WBGene00001258	emb-4	protein_coding	V	18860285	18894974	2459.51	0.304646	0.130747	0.00733881	0.0440046	0.379316	0.14148
WBGene00001259	emb-5	protein_coding	III	4715293	4720670	3730.47	0.171709	0.133588	0.138724	0.345171	0.223902	0.151228
WBGene00001262	emb-8	protein_coding	III	5196680	5199677	1796.02	0.132832	0.143621	0.275532	0.5224	0.18236	0.16724
WBGene00001263	emb-9	protein_coding	III	9336881	9344447	7302.37	0.244853	0.142188	0.0426819	0.157803	0.323885	0.159801
WBGene00001281	emb-27	protein_coding	II	8159865	8162170	876.079	0.122649	0.145025	0.317047	0.565415	0.169826	0.169733
WBGene00001284	emb-30	protein_coding	III	9435507	9441460	976.743	0.195798	0.135702	0.0947819	0.271113	0.256195	0.153346
WBGene00001303	sec-61.G	protein_coding	V	10896658	10897143	1561.46	0.174075	0.130928	0.127885	0.328122	0.22445	0.147422
WBGene00001309	emr-1	protein_coding	I	1842445	1843227	502.393	0.108504	0.152885	0.391452	0.632613	0.156644	0.182785
WBGene00001310	end-1	protein_coding	V	13985128	13987074	4.97474	-0.316214	0.651526	0.118589	NA	-1.9727	1.26397
WBGene00001311	end-3	protein_coding	V	14014695	14015980	3.57505	0.0320793	0.47666	0.827323	NA	0.333404	1.52842
WBGene00001320	ent-1	protein_coding	IV	11653417	11655470	1497.44	0.376684	0.150636	0.00251498	0.0194911	0.480623	0.159066
WBGene00001324	eor-1	protein_coding	IV	4793194	4799178	667.392	-0.0632481	0.141988	0.600955	0.795362	-0.0869743	0.16629
WBGene00001325	eor-2	protein_coding	X	14603017	14608660	434.956	-0.300834	0.173422	0.0272074	0.115592	-0.432752	0.195946
WBGene00001328	epi-1	protein_coding	IV	10666823	10679291	3815.57	0.485863	0.168203	0.000276341	0.00317351	0.601846	0.1655	Up
WBGene00001329	epn-1	protein_coding	X	14815798	14818514	1517.47	-0.03672	0.146762	0.766191	0.893427	-0.0518176	0.174258
WBGene00001330	eps-8	protein_coding	IV	14879484	14900653	1594.51	0.0291967	0.160697	0.822449	0.923122	0.0444994	0.198308
WBGene00001331	erd-2.1	protein_coding	X	10156858	10158829	497.911	0.52219	0.190655	0.000324218	0.00362118	0.656649	0.182649	Up
WBGene00001332	eri-1	protein_coding	IV	415635	419958	542.265	0.112506	0.154327	0.37686	0.620124	0.163498	0.185016
WBGene00001333	erm-1	protein_coding	I	5284026	5291604	3057.44	0.148326	0.121855	0.171662	0.394451	0.18525	0.135527
WBGene00001334	ero-1	protein_coding	I	14664449	14674841	757.831	0.275721	0.143651	0.0232378	0.103304	0.362296	0.159637
WBGene00001335	F35A5.8	protein_coding	X	3800033	3803464	156.675	-0.0438715	0.191453	0.754457	0.887236	-0.0814324	0.260361
WBGene00001336	qars-1	protein_coding	IV	15008503	15013183	2222.97	0.395108	0.139864	0.000843497	0.0079416	0.485687	0.145497
WBGene00001337	ears-1	protein_coding	I	10336395	10341178	3436.07	0.321815	0.13833	0.00643718	0.0398945	0.407499	0.149561
WBGene00001338	ears-2	protein_coding	IV	388686	390468	226.79	0.0642447	0.178826	0.638929	0.818245	0.108924	0.23215
WBGene00001340	etr-1	protein_coding	II	162374	170631	1246.21	0.114756	0.132495	0.319945	0.568812	0.150253	0.151073
WBGene00001345	fos-1	protein_coding	V	6003601	6016087	341.243	-0.184332	0.179235	0.181454	0.407625	-0.295946	0.221468
WBGene00001352	evl-14	protein_coding	III	4303096	4313128	1732.62	0.0019718	0.132118	0.986342	0.993794	0.00259421	0.151542
WBGene00001358	evl-20	protein_coding	II	8444307	8445177	160.552	-0.12081	0.191627	0.391912	0.633158	-0.216776	0.253197
WBGene00001362	exc-1	protein_coding	X	15470663	15477409	33.5755	0.0553296	0.275719	0.709123	0.860752	0.187261	0.501993
WBGene00001365	exc-4	protein_coding	I	14511431	14518719	523.657	-0.0632545	0.14863	0.611286	0.801354	-0.0899412	0.176966
WBGene00001366	exc-5	protein_coding	IV	8799081	8813670	335.448	-0.456381	0.205859	0.00253223	0.0195757	-0.623517	0.206499		Down
WBGene00001368	exc-7	protein_coding	II	9575970	9581560	315.612	-0.253897	0.200855	0.0822667	0.247874	-0.422957	0.243403
WBGene00001371	exl-1	protein_coding	II	14412202	14413475	231.421	0.122106	0.176956	0.371573	0.615997	0.200479	0.224367
WBGene00001372	exo-3	protein_coding	I	11907525	11909280	484.951	-0.0459403	0.155259	0.719007	0.866209	-0.0677979	0.18844
WBGene00001373	exp-1	protein_coding	II	6157144	6161094	18.4113	0.160087	0.360999	0.328048	0.575936	0.645838	0.660329
WBGene00001374	exp-2	protein_coding	V	6131400	6143970	193.098	-0.0720045	0.198435	0.612222	0.801885	-0.138938	0.274092
WBGene00001377	eya-1	protein_coding	I	14220693	14231360	79.3083	-0.255979	0.323365	0.136004	0.340372	-0.669689	0.449203
WBGene00001385	far-1	protein_coding	III	9080371	9081179	6569.73	0.243553	0.135412	0.0371435	0.143236	0.314249	0.150778
WBGene00001386	far-2	protein_coding	III	9081828	9082511	11900.6	-0.448905	0.127774	4.74673e-05	0.000695333	-0.524235	0.128876
WBGene00001387	far-3	protein_coding	V	12996787	12997522	53.3331	0.237476	0.304523	0.155001	0.370297	0.608951	0.428209
WBGene00001388	far-4	protein_coding	V	12998427	12999659	1.1126	0.0953381	0.631238	0.472829	NA	1.96824	2.74173
WBGene00001389	far-5	protein_coding	V	12995569	12996836	30.4822	-0.00211246	0.275987	0.988529	0.99498	-0.00745277	0.518378
WBGene00001390	far-6	protein_coding	IV	13328359	13329314	374.586	-0.00823079	0.170282	0.950986	0.979211	-0.0133097	0.216529
WBGene00001391	far-7	protein_coding	II	319789	321110	149.702	-1.64651	0.279302	3.06203e-10	1.29417e-08	-1.75481	0.278736		Down
WBGene00001392	far-8	protein_coding	III	842930	843802	364.604	-0.241669	0.173308	0.0755818	0.234163	-0.362986	0.204279
WBGene00001393	fat-1	protein_coding	IV	13315644	13318811	3669.96	-0.0857763	0.134703	0.462455	0.695312	-0.113756	0.15481
WBGene00001394	fat-2	protein_coding	IV	13323873	13326395	6216.98	-0.270866	0.167519	0.0425651	0.157409	-0.389665	0.192147
WBGene00001395	fat-3	protein_coding	IV	9803023	9806119	2210.96	-1.35586	0.183032	2.22259e-14	1.54176e-12	-1.40216	0.183599		Down
WBGene00001396	fat-4	protein_coding	IV	9799429	9802226	2935.47	-0.589782	0.194269	7.16783e-05	0.000987348	-0.712507	0.179444		Down
WBGene00001397	fat-5	protein_coding	V	17725004	17726818	206.056	1.48493	0.341916	8.2551e-07	1.91165e-05	1.64534	0.333792	Up
WBGene00001398	fat-6	protein_coding	IV	11913692	11915687	4132	-0.316439	0.343233	0.0813451	0.246007	-0.759124	0.435544
WBGene00001399	fat-7	protein_coding	V	7151353	7153146	567.138	0.685555	0.217845	3.11011e-05	0.000479664	0.808055	0.193999	Up
WBGene00001400	fax-1	protein_coding	X	3196064	3199349	20.737	-0.372187	0.478034	0.0743476	0.231867	-1.12886	0.632605
WBGene00001401	fbf-1	protein_coding	II	6078263	6080843	384.093	0.16234	0.177517	0.236542	0.478747	0.261883	0.221246
WBGene00001402	fbf-2	protein_coding	II	6088863	6091480	361.565	0.0895166	0.185096	0.51948	0.739608	0.156703	0.243272
WBGene00001403	fbl-1	protein_coding	IV	9540806	9546252	265.885	-0.22316	0.195868	0.121179	0.317554	-0.375809	0.242482
WBGene00001404	fbp-1	protein_coding	I	2581015	2586124	1308.28	0.451713	0.143905	0.000172354	0.00211096	0.544374	0.144918
WBGene00001405	fce-1	protein_coding	I	9711066	9712719	787.658	-0.0195744	0.143384	0.872205	0.944497	-0.0271699	0.168906
WBGene00001406	fce-2	protein_coding	V	20425301	20431297	218.666	0.193742	0.186632	0.168193	0.389221	0.3206	0.23265
WBGene00001410	feh-1	protein_coding	III	2549920	2560684	258.375	-0.291672	0.222919	0.0577373	0.194828	-0.50368	0.265418
WBGene00001411	fem-1	protein_coding	IV	5533140	5537962	740.671	0.00830253	0.138655	0.944402	0.976469	0.0112613	0.161479
WBGene00001412	fem-2	protein_coding	III	632019	634626	973.704	0.265765	0.149939	0.0334516	0.133264	0.358834	0.168734
WBGene00001413	fem-3	protein_coding	IV	9104966	9107607	390.302	-0.221738	0.179447	0.108918	0.296946	-0.347051	0.21649
WBGene00001414	fer-1	protein_coding	I	8623012	8631202	30.3261	0.676978	0.637538	0.016225	0.0794638	1.55594	0.647277
WBGene00001423	fib-1	protein_coding	V	15000651	15002223	4481.45	0.441816	0.134011	0.000111905	0.0014559	0.524202	0.135691
WBGene00001424	fis-1	protein_coding	II	6755174	6755965	1.13167	0.0370205	0.605586	0.767497	NA	0.853112	2.88554
WBGene00001425	fis-2	protein_coding	X	8283275	8285219	127.907	0.0323069	0.204869	0.821009	0.922279	0.0663267	0.29316
WBGene00001426	fkb-1	protein_coding	IV	11036582	11037174	1009.88	0.0962204	0.137164	0.415548	0.654777	0.128908	0.15833
WBGene00001427	fkb-2	protein_coding	I	12918722	12919280	2093.07	0.268186	0.130011	0.0180399	0.0857775	0.337017	0.142514
WBGene00001428	fkb-3	protein_coding	V	7225223	7226320	312.163	1.23836	0.252948	7.49916e-08	2.15622e-06	1.32691	0.246694	Up
WBGene00001429	fkb-4	protein_coding	V	12785153	12787126	70.3572	0.930219	0.413867	0.000565961	0.00572587	1.21395	0.352132	Up
WBGene00001430	fkb-5	protein_coding	I	3898045	3899802	344.375	1.64362	0.235796	2.83091e-13	1.64012e-11	1.72148	0.235748	Up
WBGene00001431	fkb-6	protein_coding	V	20846158	20847727	2414.5	0.240402	0.124798	0.0291489	0.121365	0.298893	0.137015
WBGene00001432	fkb-7	protein_coding	I	10667808	10671357	48.0553	-1.05151	0.608186	0.00191729	0.0156675	-1.61101	0.519219		Down
WBGene00001433	fkb-8	protein_coding	I	12915166	12918131	49.4936	0.273359	0.329506	0.117315	0.310957	0.698399	0.445936
WBGene00001434	fkh-2	protein_coding	X	3740207	3742323	21.0339	-0.722236	0.668279	0.0138973	0.0707626	-1.6406	0.666934
WBGene00001435	fkh-3	protein_coding	X	13421822	13423440	31.6973	-0.0364395	0.285854	0.805424	0.913465	-0.134711	0.546861
WBGene00001436	fkh-4	protein_coding	X	13427114	13428855	28.4688	-0.0896345	0.297069	0.554415	0.763622	-0.324475	0.548881
WBGene00001437	fkh-5	protein_coding	III	4844662	4846608	5.05266	-0.0247279	0.441957	0.868311	NA	-0.215771	1.30136
WBGene00001438	fkh-6	protein_coding	II	4379585	4383406	17.1787	-0.0904808	0.335047	0.556406	0.764757	-0.400313	0.680587
WBGene00001439	fkh-7	protein_coding	IV	5584684	5610378	599.033	-0.893049	0.221207	9.67664e-07	2.21432e-05	-0.978521	0.199775		Down
WBGene00001440	fkh-8	protein_coding	II	6189623	6191393	40.0063	-0.1311	0.280721	0.394552	0.635581	-0.394352	0.463186
WBGene00001441	fkh-9	protein_coding	X	3816847	3826963	875.829	-0.261775	0.186265	0.0637682	0.208327	-0.408013	0.220096
WBGene00001442	fkh-10	protein_coding	I	10163475	10165132	7.296	-0.0304018	0.395325	0.840202	0.9303	-0.207027	1.02674
WBGene00001443	fli-1	protein_coding	III	8675297	8683736	1237.71	0.10346	0.141667	0.391539	0.632687	0.14142	0.16505
WBGene00001444	flp-1	protein_coding	IV	9144705	9146128	173.652	-0.0742996	0.181941	0.590127	0.7892	-0.128162	0.237931
WBGene00001445	flp-2	protein_coding	X	10094430	10095245	40.5596	-0.182322	0.297437	0.255908	0.50065	-0.523175	0.460494
WBGene00001446	flp-3	protein_coding	X	10091946	10092964	103.671	-0.218437	0.228889	0.151945	0.365201	-0.429496	0.299782
WBGene00001447	flp-4	protein_coding	II	10048868	10055594	53.3039	-0.156879	0.260615	0.308492	0.557614	-0.401298	0.394051
WBGene00001448	flp-5	protein_coding	X	8528250	8531076	110.794	-0.210016	0.230019	0.168007	0.388941	-0.420451	0.304976
WBGene00001449	flp-6	protein_coding	V	9471975	9473792	126.658	-0.365615	0.241759	0.0239076	0.105181	-0.603297	0.26711
WBGene00001450	flp-7	protein_coding	X	5885865	5886833	59.1937	-0.0673416	0.245445	0.647759	0.824136	-0.182717	0.399924
WBGene00001451	flp-8	protein_coding	X	14881419	14882267	77.5539	-0.426621	0.311474	0.0210852	0.0958752	-0.760594	0.329768
WBGene00001452	flp-9	protein_coding	IV	12754558	12757570	256.164	-0.570785	0.23565	0.000638522	0.00632055	-0.744024	0.217889		Down
WBGene00001453	flp-10	protein_coding	IV	7868907	7870081	88.449	-1.06237	0.389634	0.000140609	0.00177124	-1.28985	0.338801		Down
WBGene00001454	flp-11	protein_coding	X	4677334	4678129	164.647	-0.179795	0.204363	0.216541	0.454132	-0.330018	0.267053
WBGene00001455	flp-12	protein_coding	X	4591281	4592350	106.77	-0.850231	0.35678	0.000389918	0.00418283	-1.08101	0.304783		Down
WBGene00001456	flp-13	protein_coding	IV	7696932	7698420	78.6669	-0.020032	0.228367	0.890286	0.953839	-0.0494606	0.35856
WBGene00001457	flp-14	protein_coding	III	12910510	12914783	164.341	-0.0243531	0.192933	0.862399	0.94066	-0.0458625	0.264609
WBGene00001458	flp-15	protein_coding	III	13663400	13667839	101.671	-0.376485	0.272478	0.0278932	0.117442	-0.66234	0.30123
WBGene00001459	flp-16	protein_coding	II	13235306	13237417	109.734	-0.863986	0.367076	0.000424578	0.00449234	-1.10392	0.31323
WBGene00001460	flp-17	protein_coding	IV	17190204	17191891	146.693	-0.527004	0.311827	0.00621508	0.0388449	-0.817422	0.298742		Down
WBGene00001461	flp-18	protein_coding	X	3012182	3018555	215.36	-0.27209	0.188449	0.0555548	0.189876	-0.423695	0.221307
WBGene00001462	flp-19	protein_coding	X	10604686	10605831	84.9509	-0.304547	0.265057	0.065068	0.210926	-0.592139	0.320979
WBGene00001463	flp-20	protein_coding	X	9349276	9349894	34.7509	-0.221701	0.331648	0.189204	0.418591	-0.655596	0.499335
WBGene00001464	flp-21	protein_coding	V	7793367	7794025	45.4888	-0.0890092	0.264157	0.551921	0.761205	-0.265216	0.445829
WBGene00001465	flr-1	protein_coding	X	13452667	13456542	72.185	-0.0593046	0.227454	0.684297	0.847035	-0.142352	0.350099
WBGene00001466	flr-2	protein_coding	V	11936505	11937810	26.9478	-0.241796	0.385089	0.173238	0.396778	-0.81578	0.599013
WBGene00001468	flr-4	protein_coding	X	15089397	15093585	60.3018	-0.177209	0.25652	0.252861	0.497469	-0.426163	0.372707
WBGene00001470	baz-2	protein_coding	III	7650553	7656032	684.514	0.0592394	0.143196	0.62611	0.811299	0.0819744	0.168253
WBGene00001475	fmi-1	protein_coding	V	13019061	13033401	860.219	-0.334318	0.404779	0.08388	0.250781	-0.915211	0.529451
WBGene00001476	fmo-1	protein_coding	IV	10661857	10664404	227.274	-0.121508	0.183703	0.381518	0.6237	-0.207682	0.237323
WBGene00001477	fmo-2	protein_coding	IV	10682524	10684367	257.191	-0.85404	0.863516	0.011233	0.0606544	-2.22131	0.876128
WBGene00001478	fmo-3	protein_coding	III	10694681	10698864	100.006	-0.174571	0.227413	0.2453	0.488485	-0.364075	0.313361
WBGene00001479	fmo-4	protein_coding	V	13603276	13606701	337.369	0.916037	0.230067	1.32398e-06	2.93e-05	1.00551	0.207917	Up
WBGene00001480	fmo-5	protein_coding	V	899304	903665	139.02	-0.219191	0.219668	0.145001	0.354627	-0.413094	0.283442
WBGene00001481	fog-1	protein_coding	I	3211046	3217267	214.758	0.364749	0.223567	0.0193933	0.0903872	0.573663	0.245377
WBGene00001482	fog-2	protein_coding	V	20199254	20200648	269.6	-0.037543	0.183621	0.785938	0.903715	-0.0660927	0.243355
WBGene00001483	fog-3	protein_coding	I	10016765	10018121	12.6258	0.715856	0.819688	0.0187243	0.0880114	2.15142	0.915119
WBGene00001484	fox-1	protein_coding	X	2445117	2459893	266.836	-0.211543	0.196527	0.141787	0.349754	-0.361479	0.246043
WBGene00001485	fre-1	protein_coding	V	20075916	20087735	493.855	0.160307	0.154213	0.207923	0.443575	0.229855	0.182526
WBGene00001486	frh-1	protein_coding	II	5917422	5918564	117.496	-0.138926	0.227129	0.350043	0.597134	-0.304359	0.325689
WBGene00001487	frk-1	protein_coding	IV	10043181	10045739	14.2435	-0.286818	0.506003	0.140566	0.347852	-1.24838	0.847117
WBGene00001488	frm-1	protein_coding	I	14875823	14900322	5866.76	0.0509947	0.158114	0.692612	0.850756	0.0764291	0.193338
WBGene00001489	frm-2	protein_coding	III	5976781	5982126	273.232	-0.255842	0.21584	0.0893516	0.260986	-0.451591	0.265825
WBGene00001490	frm-3	protein_coding	X	11572505	11585126	383.809	0.0193352	0.19018	0.890049	0.953824	0.0357242	0.258417
WBGene00001491	frm-4	protein_coding	I	5402882	5412400	1041.66	-0.0858125	0.144775	0.483417	0.711443	-0.119352	0.170303
WBGene00001492	frm-5.1	protein_coding	IV	32463	48880	152.532	0.245244	0.230496	0.111215	0.300977	0.465997	0.292573
WBGene00001493	frm-7	protein_coding	V	12302484	12306974	1546.59	-0.747786	0.205599	3.94573e-06	7.77535e-05	-0.845122	0.183156		Down
WBGene00001494	frm-8	protein_coding	III	3200795	3219150	289.388	-0.138753	0.180753	0.314919	0.563829	-0.230932	0.229794
WBGene00001495	F31B12.3	protein_coding	X	10819442	10820611	14.4135	-0.60553	0.69518	0.0267252	0.113982	-1.76845	0.798216
WBGene00001496	frm-10	protein_coding	V	13463207	13467131	762.408	-0.461186	0.181591	0.0010071	0.00925659	-0.596863	0.181498		Down
WBGene00001497	fars-1	protein_coding	I	6211981	6214685	1371.01	0.423069	0.149204	0.000614096	0.0061129	0.523838	0.152932
WBGene00001498	fars-3	protein_coding	II	8464848	8467072	1390.3	0.210052	0.133866	0.070293	0.222365	0.271922	0.150232
WBGene00001499	fsn-1	protein_coding	III	4937322	4939453	912.209	0.0298284	0.138149	0.801689	0.911279	0.0403411	0.160618
WBGene00001500	ftn-1	protein_coding	V	7546468	7547579	77.7832	-1.11382	0.387128	9.22413e-05	0.00123969	-1.33208	0.340673		Down
WBGene00001501	ftn-2	protein_coding	I	3680180	3680927	1521.59	-0.110659	0.128496	0.326989	0.575305	-0.142504	0.145383
WBGene00001502	ftt-2	protein_coding	X	11603708	11605419	4632.4	0.011655	0.143917	0.923876	0.966709	0.0162238	0.16979
WBGene00001503	fum-1	protein_coding	III	7465605	7467640	2418.64	0.2669	0.136997	0.0233393	0.10355	0.343724	0.151565
WBGene00001505	fut-1	protein_coding	II	8754070	8759593	139.565	-0.0806748	0.216076	0.578342	0.780457	-0.175319	0.315431
WBGene00001506	fut-2	protein_coding	V	6573939	6575890	18.1379	-0.178258	0.364427	0.284191	0.532158	-0.686298	0.64083
WBGene00001507	fut-4	protein_coding	II	2819435	2822535	5.11926	-0.0583735	0.451285	0.699591	NA	-0.50193	1.30077
WBGene00001508	fut-8	protein_coding	V	5986990	5990483	191.212	0.105236	0.193967	0.457011	0.690583	0.193502	0.26016
WBGene00001509	fzo-1	protein_coding	II	5833328	5836203	961.813	0.148933	0.138542	0.210537	0.44681	0.1992	0.159094
WBGene00001510	fzr-1	protein_coding	II	9640156	9644466	1758.23	-0.0902718	0.138304	0.447509	0.682828	-0.121656	0.160163
WBGene00001511	fzy-1	protein_coding	II	5500770	5503912	1404.21	0.207204	0.1355	0.0766746	0.236554	0.270147	0.152598
WBGene00001512	gab-1	protein_coding	III	12771868	12779726	44.5664	-0.43123	0.40463	0.0365576	0.141838	-0.943346	0.451217
WBGene00001513	gad-1	protein_coding	V	6431333	6433496	1208.19	0.14519	0.130452	0.203153	0.437563	0.187717	0.147505
WBGene00001514	xnd-1	protein_coding	III	5604460	5607556	1475.75	0.304264	0.151324	0.015354	0.0760205	0.404989	0.16708
WBGene00001515	gap-1	protein_coding	X	2192504	2195348	135.483	-0.174644	0.205053	0.230139	0.470839	-0.323497	0.26958
WBGene00001516	gap-2	protein_coding	X	9472470	9516454	1012.07	0.0583931	0.158174	0.650878	0.825755	0.0874702	0.193286
WBGene00001517	gar-1	protein_coding	X	6479443	6484880	60.6119	-0.184864	0.268454	0.239509	0.48179	-0.462948	0.393591
WBGene00001518	gar-2	protein_coding	III	6309366	6320873	161.082	-0.298559	0.234549	0.057514	0.194212	-0.531109	0.279622
WBGene00001519	gar-3	protein_coding	V	14564819	14579719	157.551	-0.235669	0.20739	0.110538	0.299564	-0.411965	0.258159
WBGene00001520	gas-1	protein_coding	X	15586786	15590397	1213.1	0.526559	0.160809	4.9445e-05	0.000716837	0.627929	0.15473	Up
WBGene00001522	gbh-1	protein_coding	II	10690452	10693803	103.349	0.0098345	0.216857	0.945625	0.97695	0.0222358	0.32603
WBGene00001523	gbh-2	protein_coding	II	8485879	8487571	113.53	-0.685973	0.330082	0.00122367	0.0108537	-0.936103	0.289519
WBGene00001526	gck-1	protein_coding	V	8947799	8956296	1137.04	-0.108082	0.135446	0.35628	0.601933	-0.143479	0.155537
WBGene00001527	gcs-1	protein_coding	II	9035562	9038301	1030.5	0.205072	0.136447	0.0812302	0.245756	0.268519	0.154003
WBGene00001528	gcy-1	protein_coding	II	9512490	9516936	1.21242	-0.0652844	0.58971	0.62719	NA	-1.202	2.47485
WBGene00001530	gcy-3	protein_coding	II	9502757	9507281	11.8943	-0.191229	0.419101	0.26651	0.512002	-0.875518	0.787948
WBGene00001531	gcy-4	protein_coding	II	10304139	10308826	6.87335	0.048827	0.403508	0.747817	0.883187	0.336522	1.04666
WBGene00001532	gcy-5	protein_coding	II	10310400	10316219	6.32385	-0.0456625	0.405904	0.763264	0.891627	-0.320486	1.06404
WBGene00001533	gcy-6	protein_coding	V	10308291	10314053	8.57018	0.0321833	0.370956	0.830918	0.926559	0.192923	0.903517
WBGene00001534	gcy-7	protein_coding	V	8387356	8392324	13.0018	-0.817572	0.826159	0.0123474	0.0646368	-2.11154	0.843923
WBGene00001535	gcy-8	protein_coding	IV	7928152	7933782	33.8075	-0.476449	0.466985	0.0330537	0.13252	-1.09852	0.51539
WBGene00001536	gcy-9	protein_coding	X	11332110	11337883	26.6197	-0.0942065	0.303994	0.53651	0.751632	-0.350691	0.56737
WBGene00001537	gcy-11	protein_coding	X	17046241	17055581	119.716	-0.481092	0.307272	0.010435	0.0572407	-0.78457	0.306344
WBGene00001538	gcy-12	protein_coding	II	5312046	5319617	922.273	-0.0161337	0.162109	0.90176	0.958288	-0.0248119	0.201008
WBGene00001539	gcy-13	protein_coding	V	12363754	12369537	3.51895	-0.0677404	0.485039	0.651809	NA	-0.675397	1.49672
WBGene00001540	gcy-14	protein_coding	V	14863134	14868281	6.71643	-0.0633554	0.410758	0.678935	0.843047	-0.438476	1.05933
WBGene00001541	gcy-15	protein_coding	II	3192349	3197066	36.4883	-0.0978781	0.281204	0.517705	0.738611	-0.317885	0.491407
WBGene00001542	gcy-17	protein_coding	I	2223353	2233099	11.2472	-0.172896	0.415889	0.305833	0.555305	-0.838328	0.818675
WBGene00001543	gcy-18	protein_coding	IV	12860097	12865956	67.6979	-0.0464041	0.241577	0.751382	0.885436	-0.124967	0.394444
WBGene00001544	gcy-19	protein_coding	II	3250975	3259354	47.6541	-0.524801	0.432431	0.0189452	0.088834	-1.0297	0.438802
WBGene00001545	gcy-20	protein_coding	V	16248583	16253787	7.29419	-0.100477	0.430554	0.523269	0.742144	-0.684563	1.07245
WBGene00001546	gcy-21	protein_coding	II	2659664	2664686	50.5842	-0.025847	0.242592	0.859543	0.938804	-0.0710665	0.401607
WBGene00001547	gcy-22	protein_coding	V	20820118	20825062	53.9042	-0.263064	0.314987	0.124367	0.322251	-0.657071	0.427586
WBGene00001548	gcy-23	protein_coding	IV	3282885	3289337	41.044	-0.243874	0.314205	0.149153	0.360824	-0.637338	0.44182
WBGene00001549	gcy-25	protein_coding	IV	15872933	15882377	6.06745	0.0150611	0.407328	0.920054	0.965107	0.110709	1.10305
WBGene00001550	gcy-27	protein_coding	IV	17432977	17436652	6.40964	-0.122449	0.448625	0.446012	0.681553	-0.83621	1.09727
WBGene00001551	gcy-31	protein_coding	X	2419955	2427504	17.9919	-0.240532	0.419757	0.182708	0.409729	-0.920954	0.691167
WBGene00001552	gcy-32	protein_coding	V	13912080	13915490	18.0009	-0.111748	0.336794	0.474093	0.70449	-0.470298	0.656991
WBGene00001553	gcy-33	protein_coding	V	11995805	12001797	23.7916	-0.189396	0.352826	0.256701	0.501596	-0.670605	0.591246
WBGene00001554	gcy-34	protein_coding	V	13383019	13385898	13.9427	-0.193632	0.416292	0.26126	0.506002	-0.868744	0.773305
WBGene00001555	gcy-35	protein_coding	I	13325230	13333513	56.6686	-0.275514	0.300552	0.105108	0.290153	-0.636834	0.392967
WBGene00001556	gcy-36	protein_coding	X	15479017	15485711	22.9605	-0.034545	0.301784	0.816046	0.919739	-0.141259	0.607217
WBGene00001557	gcy-37	protein_coding	IV	2150647	2159169	28.4353	0.0483183	0.284135	0.744642	0.882217	0.174244	0.534963
WBGene00001558	gdi-1	protein_coding	IV	14790818	14792887	3449.24	0.253439	0.123169	0.0201398	0.0930531	0.312434	0.134454
WBGene00001559	gei-1	protein_coding	III	3344873	3363427	642.49	0.156679	0.180412	0.256623	0.501541	0.257588	0.227068
WBGene00001560	gei-3	protein_coding	X	12795201	12813639	824.186	-0.0256339	0.170982	0.848483	0.933275	-0.0415959	0.217718
WBGene00001561	gei-4	protein_coding	III	344306	354800	1824.83	-0.192566	0.158506	0.136646	0.341208	-0.278411	0.187054
WBGene00001562	lin-66	protein_coding	IV	13888079	13893986	1622.7	0.00677671	0.158123	0.958097	0.983307	0.0101853	0.193849
WBGene00001563	gei-6	protein_coding	V	7226376	7230848	1335.37	0.106107	0.148055	0.392848	0.634141	0.149548	0.17502
WBGene00001564	icl-1	protein_coding	V	724332	728004	8422.87	-0.0129984	0.255392	0.929234	0.969077	-0.0395376	0.445199
WBGene00001565	gei-8	protein_coding	III	8111168	8121232	1076.97	0.0521051	0.149863	0.676984	0.842432	0.0746461	0.179187
WBGene00001566	acdh-13	protein_coding	IV	8496485	8498823	540.107	0.233155	0.15182	0.0643613	0.209601	0.321798	0.173976
WBGene00001568	snpc-4	protein_coding	I	8962322	8966129	1249.57	0.107176	0.132727	0.353567	0.599576	0.14059	0.151548
WBGene00001569	meg-3	protein_coding	X	1986469	1989607	726.596	0.348634	0.166135	0.00866456	0.0499003	0.472955	0.180173
WBGene00001570	gei-13	protein_coding	III	9631994	9637116	719.96	-0.000349455	0.289898	0.998108	0.999326	-0.00135171	0.570151
WBGene00001571	gei-14	protein_coding	II	8273543	8276231	667.826	0.0943028	0.146304	0.444233	0.679976	0.132006	0.172542
WBGene00001572	gei-15	protein_coding	X	6820005	6823268	378.436	-0.197951	0.176948	0.149089	0.360824	-0.311415	0.215848
WBGene00001574	gei-17	protein_coding	I	9100843	9108140	1644.93	-0.0648924	0.1375	0.583591	0.783847	-0.0873268	0.159313
WBGene00001575	gei-18	protein_coding	IV	13981062	13982525	7.82514	-0.211204	0.499727	0.235925	0.478381	-1.22293	1.0318
WBGene00001577	gem-4	protein_coding	IV	11745640	11748689	109.776	-0.777828	0.360747	0.000828689	0.00783557	-1.03564	0.30979		Down
WBGene00001578	ges-1	protein_coding	V	1427653	1432137	385.681	-0.0596702	0.15575	0.640904	0.819266	-0.0881713	0.189032
WBGene00001579	gex-2	protein_coding	IV	572769	583577	800.749	0.308629	0.150122	0.0134429	0.0689024	0.408231	0.165154
WBGene00001580	gex-3	protein_coding	IV	12404431	12408690	1269.81	0.0127576	0.13577	0.913449	0.962085	0.0170677	0.157032
WBGene00001581	gfi-1	protein_coding	V	6392537	6399931	3779.58	0.340122	0.167612	0.0108674	0.0592135	0.46628	0.183075
WBGene00001582	gfi-2	protein_coding	I	9737816	9744146	1360.86	0.0684198	0.138381	0.564971	0.770411	0.0924303	0.160616
WBGene00001583	gfi-3	protein_coding	X	14480572	14484702	280.468	0.368474	0.199306	0.0123541	0.0646501	0.540064	0.215865
WBGene00001584	nrde-4	protein_coding	IV	7646320	7654262	985.627	0.0699506	0.134634	0.54889	0.75919	0.0928602	0.154916
WBGene00001585	gfl-1	protein_coding	IV	11521290	11522214	240.293	-0.0421203	0.182583	0.760128	0.889994	-0.0735703	0.240967
WBGene00001586	lgc-57	protein_coding	II	10695013	10702555	33.9633	-0.109767	0.288246	0.472333	0.70309	-0.361397	0.502856
WBGene00001587	lgc-58	protein_coding	X	6075509	6081881	29.3332	-0.247245	0.357665	0.158264	0.375288	-0.745601	0.528445
WBGene00001588	lgc-56	protein_coding	II	5130381	5133472	31.4658	-0.0673932	0.273604	0.65074	0.825755	-0.22104	0.488232
WBGene00001589	gip-1	protein_coding	III	2347591	2362056	759.655	0.194836	0.146582	0.114265	0.306177	0.266854	0.168969
WBGene00001590	lipt-1	protein_coding	I	9226905	9228184	143.921	-0.0972452	0.207244	0.499919	0.724223	-0.196244	0.290897
WBGene00001591	glc-1	protein_coding	V	16219634	16221917	170.375	-1.26145	0.270247	2.10895e-07	5.47371e-06	-1.36264	0.262577		Down
WBGene00001592	glc-2	protein_coding	I	4885041	4888002	99.1138	-0.386095	0.293153	0.0294026	0.121938	-0.704355	0.323388
WBGene00001593	glc-3	protein_coding	V	5449275	5453715	28.7236	-0.253314	0.357862	0.150204	0.362085	-0.751017	0.52197
WBGene00001594	glc-4	protein_coding	II	7172204	7174943	104.329	-0.463293	0.312162	0.0136985	0.0700502	-0.782381	0.317386
WBGene00001595	gld-1	protein_coding	I	7695681	7698222	7096	0.118849	0.146337	0.335028	0.582243	0.165722	0.171904
WBGene00001596	gld-2	protein_coding	I	6369748	6386194	2907.67	0.0424836	0.133102	0.713668	0.863373	0.0560945	0.152873
WBGene00001597	gld-3	protein_coding	II	7132643	7137522	2687.6	0.175419	0.136183	0.135545	0.339609	0.231038	0.15479
WBGene00001598	glh-1	protein_coding	I	6854478	6857536	3416.01	0.27398	0.143986	0.0243521	0.106685	0.360699	0.160202
WBGene00001599	glh-2	protein_coding	I	6513928	6517507	1629.27	0.13652	0.137283	0.248204	0.491736	0.181984	0.1576
WBGene00001600	glh-3	protein_coding	I	5792321	5795114	552.613	-0.00584133	0.149973	0.962764	0.984811	-0.008392	0.179756
WBGene00001601	glh-4	protein_coding	I	3727027	3731179	1451.06	0.513189	0.151725	3.78842e-05	0.000570624	0.607263	0.147393	Up
WBGene00001602	gln-1	protein_coding	X	6058255	6060242	221.94	-0.174868	0.184694	0.210772	0.44712	-0.290645	0.232248
WBGene00001603	gln-2	protein_coding	III	9943243	9944823	38.8719	1.07098	0.781149	0.00386559	0.0272796	1.98752	0.687979	Up
WBGene00001604	gln-3	protein_coding	IV	16167781	16170678	1746.58	0.2294	0.186025	0.103247	0.286994	0.367505	0.225558
WBGene00001605	gln-4	pseudogene	III	13601760	13603156	5.43584	0.108231	0.489083	0.489402	0.715418	0.94777	1.37108
WBGene00001606	gln-5	protein_coding	IV	17272231	17273652	1897.03	0.208535	0.133417	0.0716848	0.225568	0.269588	0.149678
WBGene00001607	gln-6	protein_coding	IV	9739261	9740901	4434.52	0.286664	0.123475	0.00858539	0.0495782	0.350825	0.133488
WBGene00001608	R07B1.8	protein_coding	X	9870632	9872654	30.0237	-0.0701215	0.299587	0.640843	0.819266	-0.268129	0.574743
WBGene00001609	glp-1	protein_coding	III	9092241	9099698	2795.32	0.100225	0.144869	0.413257	0.652997	0.139189	0.170121
WBGene00001612	glr-1	protein_coding	III	8584163	8588642	71.4892	-0.383099	0.3721	0.0486596	0.172721	-0.855472	0.433906
WBGene00001613	glr-2	protein_coding	III	7138640	7144959	35.6508	-0.110184	0.301435	0.473373	0.703962	-0.389178	0.542786
WBGene00001614	glr-3	protein_coding	I	7117808	7121545	8.72115	-0.0726971	0.400157	0.636989	0.81725	-0.46601	0.987491
WBGene00001615	glr-4	protein_coding	II	7785100	7794322	127.063	-0.33256	0.262822	0.0453862	0.164931	-0.611963	0.30582
WBGene00001616	glr-5	protein_coding	V	8716495	8720516	132.758	-0.212779	0.213529	0.152421	0.366061	-0.393224	0.274783
WBGene00001617	glr-6	protein_coding	X	6836210	6840720	81.1117	-0.0578148	0.222826	0.690888	0.850013	-0.134242	0.337587
WBGene00001618	glr-7	protein_coding	X	2413909	2419877	10.6016	-0.277255	0.499056	0.149436	0.361248	-1.222	0.84771
WBGene00001619	glr-8	protein_coding	X	6505980	6509957	13.2798	-0.277648	0.478118	0.146721	0.356799	-1.13858	0.784574
WBGene00001620	glt-1	protein_coding	X	3496026	3499169	885.563	-0.0469678	0.157581	0.715271	0.864012	-0.0702118	0.192474
WBGene00001621	glt-3	protein_coding	IV	10130257	10133283	92.0162	-0.0813012	0.228336	0.579134	0.781185	-0.19255	0.347157
WBGene00001622	glt-4	protein_coding	X	6403422	6408411	262.416	-0.459629	0.236773	0.00492935	0.0324899	-0.667311	0.237341		Down
WBGene00001623	glt-5	protein_coding	II	9706481	9708885	54.0904	-0.19739	0.280938	0.216988	0.454699	-0.507958	0.411443
WBGene00001624	glt-6	protein_coding	IV	7503622	7506447	46.4243	0.183827	0.290076	0.249934	0.494102	0.508741	0.442188
WBGene00001625	glt-7	protein_coding	IV	532135	535688	23.2803	-0.00828007	0.292517	0.955243	0.981484	-0.0325332	0.579665
WBGene00001626	gly-1	protein_coding	II	10899985	10902204	4.25917	-0.0450583	0.451293	0.763846	NA	-0.399567	1.32997
WBGene00001627	gly-2	protein_coding	I	6507894	6511619	105.851	-0.0238604	0.204518	0.867192	0.942565	-0.048953	0.292735
WBGene00001628	gly-3	protein_coding	III	7914306	7917767	931.163	0.28501	0.139263	0.0165457	0.0804861	0.367469	0.153326
WBGene00001629	gly-4	protein_coding	V	19881372	19895350	754.566	0.232921	0.165218	0.0787621	0.24069	0.339968	0.193393
WBGene00001630	gly-5	protein_coding	III	13187390	13204903	1053.25	0.321805	0.146325	0.00872345	0.0501647	0.417697	0.159262
WBGene00001631	gly-6	protein_coding	III	4324280	4331228	379.702	0.0266077	0.165376	0.840305	0.9303	0.0417032	0.20696
WBGene00001632	gly-7	protein_coding	V	1815851	1821323	1208.39	0.502843	0.161953	0.000113763	0.00147511	0.609258	0.157872	Up
WBGene00001633	gly-8	protein_coding	III	11625242	11628235	303.902	1.55949	0.250579	5.06147e-11	2.33719e-09	1.64739	0.250777	Up
WBGene00001635	gly-10	protein_coding	IV	13779096	13782396	913.723	0.353316	0.148732	0.00431834	0.0294867	0.454363	0.159207
WBGene00001636	gly-11	protein_coding	III	12171354	12177245	121.797	0.238451	0.235705	0.123619	0.32128	0.467746	0.303778
WBGene00001637	gly-12	protein_coding	X	7485864	7490707	114.304	0.254621	0.233438	0.100606	0.282089	0.48244	0.293826
WBGene00001638	gly-13	protein_coding	X	9293666	9296622	254.219	0.0149991	0.172465	0.911328	0.961488	0.0245867	0.220778
WBGene00001639	gly-14	protein_coding	III	3490337	3493238	22.7002	-0.00716972	0.304056	0.961351	0.984217	-0.0302661	0.624575
WBGene00001640	gly-15	protein_coding	I	12462176	12465816	1.71125	0.101413	0.60067	0.473167	NA	1.65673	2.30956
WBGene00001643	gly-18	protein_coding	I	7110234	7112443	18.4487	-0.287446	0.43582	0.129923	0.330936	-0.991847	0.654941
WBGene00001644	gly-19	protein_coding	I	7112867	7115055	61.6915	0.0168924	0.233143	0.907566	0.960168	0.0433278	0.373164
WBGene00001645	gly-20	protein_coding	V	11282572	11286039	989.808	0.194769	0.143564	0.109575	0.298105	0.263343	0.164579
WBGene00001646	gna-1	protein_coding	V	10319654	10320151	34.7195	0.204551	0.321356	0.216817	0.454463	0.610324	0.494174
WBGene00001647	gna-2	protein_coding	I	7699682	7700958	882.57	-0.0273722	0.152082	0.828243	0.926074	-0.0397493	0.183214
WBGene00001648	goa-1	protein_coding	I	7522116	7526716	2249.9	-0.0864262	0.128809	0.44481	0.680389	-0.111683	0.146163
WBGene00001649	gob-1	protein_coding	X	15493602	15497504	550.863	0.199652	0.150714	0.111743	0.301757	0.277952	0.174768
WBGene00001650	gon-1	protein_coding	IV	9934206	9953433	1273.25	0.677904	0.22441	5.12721e-05	0.000739169	0.808755	0.199705	Up
WBGene00001651	gon-2	protein_coding	I	8549513	8570998	1111.46	0.107198	0.172441	0.427031	0.664501	0.172441	0.217103
WBGene00001653	gon-4	protein_coding	IV	10197817	10202993	1337.47	0.0086113	0.140812	0.942921	0.976313	0.0118033	0.164854
WBGene00001660	gop-1	protein_coding	III	5254438	5258886	492.793	0.0128721	0.153218	0.919084	0.964725	0.0188187	0.185247
WBGene00001661	gop-2	protein_coding	III	5259023	5260512	393.769	-0.246756	0.174586	0.0707567	0.223463	-0.371265	0.205455
WBGene00001662	gop-3	protein_coding	III	5260694	5263837	708.161	0.0542886	0.140951	0.651926	0.826272	0.0743279	0.164775
WBGene00001663	gpa-1	protein_coding	V	11174433	11177677	19.1199	-0.144137	0.356238	0.371314	0.615875	-0.600544	0.671738
WBGene00001664	gpa-2	protein_coding	V	8371005	8374034	34.7043	-0.220986	0.327085	0.188954	0.418235	-0.643679	0.489982
WBGene00001665	gpa-3	protein_coding	V	9356581	9359774	45.5806	-0.330727	0.343422	0.0709683	0.223997	-0.767967	0.425306
WBGene00001666	gpa-4	protein_coding	IV	401695	405273	33.5863	-0.198322	0.333113	0.232713	0.474287	-0.631309	0.529001
WBGene00001667	gpa-5	protein_coding	X	2118894	2121061	2.36156	-0.00611285	0.506933	0.965791	NA	-0.0772928	1.80223
WBGene00001668	gpa-6	protein_coding	X	13191212	13194390	6.57887	-0.197819	0.495248	0.259001	0.503961	-1.19382	1.05764
WBGene00001669	gpa-7	protein_coding	IV	10404008	10408747	174.147	-0.253871	0.207245	0.0864458	0.255733	-0.434019	0.253153
WBGene00001670	gpa-8	protein_coding	V	12638666	12640484	9.11246	-0.445771	0.663906	0.0591225	0.197658	-1.79996	0.953734
WBGene00001671	gpa-9	protein_coding	V	12645477	12649313	19.1364	-0.449461	0.529611	0.0485371	0.172483	-1.27612	0.646913
WBGene00001672	gpa-10	protein_coding	V	6852521	6854811	9.27335	-0.373099	0.603138	0.0859962	0.254721	-1.6117	0.938723
WBGene00001673	gpa-11	protein_coding	II	4247197	4255577	14.8449	-0.334786	0.493257	0.0996342	0.280124	-1.18585	0.720167
WBGene00001674	gpa-12	protein_coding	X	9243557	9249107	66.5679	0.0709831	0.232094	0.628208	0.812249	0.174451	0.36025
WBGene00001675	gpa-13	protein_coding	V	12752603	12754939	9.9221	-0.281872	0.520117	0.146481	0.356668	-1.31086	0.902747
WBGene00001676	gpa-14	protein_coding	I	5942390	5945651	21.8854	-0.387569	0.472253	0.0655724	0.212132	-1.11018	0.602924
WBGene00001677	gpa-15	protein_coding	I	8531684	8534527	15.3969	0.0181586	0.327303	0.903012	0.958664	0.0873324	0.716675
WBGene00001678	gpa-16	protein_coding	I	897286	907370	787.572	0.0590524	0.141871	0.625129	0.810892	0.0811856	0.166162
WBGene00001679	gpb-1	protein_coding	II	11742811	11748611	4092.96	0.132106	0.159645	0.308842	0.557803	0.196366	0.19296
WBGene00001680	gpb-2	protein_coding	I	7318290	7321085	264.339	-0.488259	0.22698	0.00236217	0.0185202	-0.674962	0.221994		Down
WBGene00001681	gpc-1	protein_coding	X	12881109	12884989	36.4489	-0.392769	0.394702	0.0491106	0.174002	-0.909177	0.462067
WBGene00001682	gpc-2	protein_coding	I	6757763	6758178	411.137	-0.283112	0.167336	0.0339283	0.134567	-0.403658	0.190322
WBGene00001683	gpd-1	protein_coding	II	10394129	10395349	1706.02	0.535199	0.1618	4.03056e-05	0.000601242	0.636121	0.154935
WBGene00001684	gpd-2	protein_coding	X	3113443	3114689	1846.9	0.499925	0.214246	0.00131453	0.0114819	0.66748	0.207757	Up
WBGene00001685	gpd-3	protein_coding	X	3112091	3113341	2366.54	0.0386625	0.161476	0.766948	0.893771	0.0591497	0.199581
WBGene00001686	gpd-4	protein_coding	II	10171268	10172498	1009.78	0.346937	0.151603	0.00566744	0.0360929	0.451471	0.163196
WBGene00001687	gpn-1	protein_coding	X	15681693	15687477	19.5214	0.172969	0.363429	0.296349	0.545221	0.675105	0.646469
WBGene00001688	gpr-1	protein_coding	III	8628932	8630776	209.602	0.306213	0.202563	0.0380354	0.145726	0.484398	0.233504
WBGene00001689	gpr-2	protein_coding	III	9391330	9393164	236.724	0.238216	0.19125	0.0950776	0.271672	0.387357	0.232061
WBGene00001690	grd-1	protein_coding	X	11109440	11115887	123.181	1.98641	0.354946	7.45145e-10	2.97079e-08	2.14739	0.348817	Up
WBGene00001691	grd-2	protein_coding	V	20609794	20613929	32.8384	0.771067	0.600725	0.0083726	0.0485805	1.46758	0.556606	Up
WBGene00001692	grd-3	protein_coding	IV	3439655	3440453	339.417	-0.461787	0.221536	0.00340681	0.024707	-0.64828	0.221375		Down
WBGene00001693	grd-4	protein_coding	X	8501222	8502288	4.16841	0.0444995	0.467351	0.764971	NA	0.429821	1.43772
WBGene00001694	grd-5	protein_coding	V	8619032	8619870	275.53	1.11905	0.254027	4.68274e-07	1.12655e-05	1.21092	0.240315	Up
WBGene00001695	grd-6	protein_coding	V	9221866	9224354	157.116	2.39484	0.3674	1.05316e-12	5.75665e-11	2.54419	0.357161	Up
WBGene00001696	grd-7	protein_coding	X	7267870	7269479	2.83651	0.170513	0.605582	0.29197	NA	1.89126	1.79468
WBGene00001697	grd-8	protein_coding	V	7842528	7844353	3.43305	-0.152403	0.631023	0.317278	NA	-2.14296	2.14281
WBGene00001698	grd-9	protein_coding	V	5895321	5898602	3.20692	-0.0480382	0.479172	0.745871	NA	-0.490228	1.51264
WBGene00001699	grd-10	protein_coding	IV	3441055	3441841	264.436	-0.406341	0.201482	0.00625117	0.0389917	-0.576637	0.21089
WBGene00001700	grd-11	protein_coding	V	20356772	20365773	16.0093	0.189042	0.405847	0.268925	0.514788	0.827888	0.748853
WBGene00001701	grd-12	protein_coding	V	14978505	14980250	24.5102	0.461292	0.536292	0.0455617	0.165234	1.29408	0.647222
WBGene00001702	grd-13	protein_coding	IV	3438312	3439507	254.456	-0.0534253	0.172333	0.691668	0.850128	-0.0871199	0.219671
WBGene00001703	grd-14	protein_coding	X	8500021	8501037	120.91	2.69278	0.349339	1.42786e-16	1.1625e-14	2.81331	0.340496	Up
WBGene00001704	grd-15	protein_coding	I	13564567	13566362	8.00205	0.130603	0.429706	0.42047	0.659059	0.792548	0.983791
WBGene00001705	grd-16	protein_coding	IV	2476686	2480316	22.4188	-0.187818	0.378999	0.266319	0.51182	-0.742353	0.667837
WBGene00001707	grh-1	protein_coding	I	1258201	1268155	535.556	0.0256103	0.199168	0.856652	0.937366	0.0504671	0.279382
WBGene00001708	grk-1	protein_coding	X	9991248	9999208	525.021	0.0943728	0.1645	0.474045	0.70449	0.145557	0.203317
WBGene00001709	grk-2	protein_coding	III	676122	680658	345.791	-0.386837	0.194354	0.00783364	0.0461808	-0.549528	0.206655
WBGene00001710	grl-1	protein_coding	V	5530725	5533855	43.9077	0.0776124	0.27539	0.603793	0.796866	0.253111	0.487733
WBGene00001711	grl-2	protein_coding	V	12945075	12946858	12.7043	0.0319512	0.350902	0.831602	0.926872	0.172525	0.811323
WBGene00001712	grl-3	protein_coding	V	11411511	11412894	1.13313	0.06598	0.612346	0.609524	NA	1.41654	2.77344
WBGene00001713	grl-4	protein_coding	IV	7309838	7310760	411.894	1.26453	0.235696	8.21173e-09	2.85455e-07	1.34108	0.232663	Up
WBGene00001714	grl-5	protein_coding	V	4412748	4414663	176.195	0.568067	0.719992	0.03313	0.132687	1.8957	0.88979
WBGene00001715	grl-6	protein_coding	X	6449959	6450939	13.6039	0.216495	0.429474	0.221444	0.460462	0.937353	0.766627
WBGene00001716	grl-7	protein_coding	V	11344828	11347012	440.98	0.779686	0.748891	0.0127229	0.0660658	1.87405	0.752198
WBGene00001717	grl-8	protein_coding	V	6731831	6733095	9.5127	-0.0581571	0.40238	0.703197	0.856321	-0.390768	1.02561
WBGene00001718	grl-9	protein_coding	V	6730216	6731694	3.53401	0.053445	0.479268	0.719466	NA	0.538475	1.49921
WBGene00001719	grl-10	protein_coding	V	7774545	7775759	101.167	0.31089	0.287679	0.0682462	0.217625	0.640449	0.351243
WBGene00001720	grl-11	protein_coding	III	9117349	9118364	6.66122	-2.36355	2.06061	0.000548039	0.00557005	-6.17349	1.78626		Down
WBGene00001721	grl-12	protein_coding	V	8635820	8637007	8.60544	0.195713	0.461228	0.262038	0.506974	1.04048	0.927689
WBGene00001722	grl-13	protein_coding	V	4362668	4364617	3.37264	0.0229007	0.484716	0.875119	NA	0.252003	1.60348
WBGene00001723	grl-14	protein_coding	V	20825559	20827743	11.4996	-0.0244511	0.353122	0.870544	0.944116	-0.134643	0.826191
WBGene00001724	grl-15	protein_coding	III	12232632	12236014	148.017	0.948097	0.445748	0.000786088	0.00746928	1.27167	0.378738	Up
WBGene00001725	grl-16	protein_coding	I	572173	575120	1216.11	2.11651	0.516402	8.4132e-07	1.94244e-05	2.42357	0.492043	Up
WBGene00001726	grl-17	protein_coding	V	13561973	13563941	5.10655	-0.0595913	0.451773	0.693844	NA	-0.512073	1.30085
WBGene00001727	grl-18	protein_coding	V	5485631	5488866	16.3356	-0.164047	0.36728	0.319154	0.568123	-0.670711	0.673271
WBGene00001728	grl-19	protein_coding	IV	251908	252554	0.953444	0.162652	0.731183	0.226116	NA	3.85309	3.18325
WBGene00001729	grl-20	protein_coding	IV	2126136	2128861	14.0234	0.907937	0.872009	0.00920776	0.0520405	2.22927	0.856017
WBGene00001730	grl-21	protein_coding	IV	10737474	10738191	92.9501	0.543968	0.342267	0.00742727	0.0444115	0.87341	0.326258	Up
WBGene00001731	grl-22	protein_coding	III	5413137	5414011	7.96097	0.0739494	0.394666	0.631414	0.814191	0.459843	0.958531
WBGene00001732	grl-23	protein_coding	V	12575191	12576897	9.67088	0.588132	0.807398	0.0319079	0.129268	2.2533	1.05021
WBGene00001734	grl-25	protein_coding	III	8962293	8965707	29.7101	3.3103	0.746821	1.02438e-07	2.86032e-06	3.7629	0.707001	Up
WBGene00001735	grl-26	protein_coding	IV	321514	322814	1.69936	-0.152079	0.632161	0.317363	NA	-2.15579	2.15603
WBGene00001736	grl-27	protein_coding	V	3575055	3575859	7.10594	0.433347	0.760763	0.0630817	0.207003	2.34441	1.26138
WBGene00001739	grl-30	protein_coding	V	3556286	3556804	0.501251	0.0417616	0.666464	0.688935	NA	1.67231	4.17763
WBGene00001740	gro-1	protein_coding	III	5265113	5267204	197.564	-0.117494	0.190431	0.403826	0.644268	-0.209708	0.251205
WBGene00001743	grp-1	protein_coding	III	8085705	8088449	670.044	-0.0453729	0.144183	0.710237	0.861428	-0.0631598	0.169996
WBGene00001744	gars-1	protein_coding	III	5159729	5163627	1735.76	0.517877	0.150207	2.82393e-05	0.000441246	0.609726	0.145616	Up
WBGene00001745	gsa-1	protein_coding	I	1068484	1074343	902.596	0.323169	0.194444	0.0257242	0.110874	0.48889	0.219199
[truncated: 19,892 more rows]

## Sheet: WRM92 aux v ct
Gene	Name	Type	Chr	Start	End	baseMean	log2FoldChange_shrunken	lfcSE_shrunken	pvalue	padj	log2FoldChange_raw	lfcSE_raw	UP_WrM92 aux vs ct	DOWN_WrM92 aux vs ct
[truncated: 21,232 more rows]

[truncated: 8 more sheets: WRM92 v WRM66, WRM92aux v WRM66aux, Upset Values, UP Aux Dependence, DOWN Aux Dependence, UP Genotype, Down Genotype, Tsukomoto Comparison]
